# Supplementary material for: Insight into ortho -boronoaldehyde conjugation via a FRET-based reporter assay
Source: Royal Society of Chemistry journal article supplement (doi:10.1039/d2sc04574e), 2022-01-01

## Insight into *ortho*-boronoaldehyde conjugation via a FRET-based reporter assay

N. C. Rose,<sup>a,b</sup> A. V. Sanchez,<sup>a,b</sup> E. F. Tipple,<sup>a,b</sup> J. M. Lynam,<sup>a</sup> and C. D. Spicer<sup>\*a,b</sup>

<sup>a</sup>Department of Chemistry, University of York, Heslington, YO10 5DD, UK.

<sup>b</sup>York Biomedical Research Institute, University of York, Heslington, YO10 5DD, UK.

### Table of contents

|            |                                                                        |
|------------|------------------------------------------------------------------------|
| <b>S2</b>  | Supplementary figures                                                  |
| <b>S7</b>  | General considerations                                                 |
| <b>S8</b>  | Core dye synthesis                                                     |
| <b>S14</b> | Synthesis of reactive handles                                          |
| <b>S22</b> | Reactive dye synthesis                                                 |
| <b>S35</b> | Synthesis of Cy3 negative controls                                     |
| <b>S41</b> | Synthesis of control substrates for FRET studies                       |
| <b>S48</b> | Synthesis of OBA substrates for NMR and LC-MS studies                  |
| <b>S55</b> | Synthesis of nucleophiles for NMR and LC-MS studies, and FRET controls |
| <b>S63</b> | Determination of substrate concentration via UV-Vis absorbance         |
| <b>S63</b> | Initial screening of Cy3 quenching                                     |
| <b>S64</b> | FRET studies                                                           |
| <b>S65</b> | LC-MS reversibility studies                                            |
| <b>S66</b> | NMR studies of pH dependent DAB-hydrazone exchange                     |
| <b>S67</b> | NMR studies of sugar binding                                           |
| <b>S67</b> | NMR studies of analogue reaction equilibria                            |
| <b>S68</b> | DFT                                                                    |
| <b>S85</b> | References                                                             |
| <b>S87</b> | NMR spectra of novel compounds                                         |

## Supplementary figures and tables

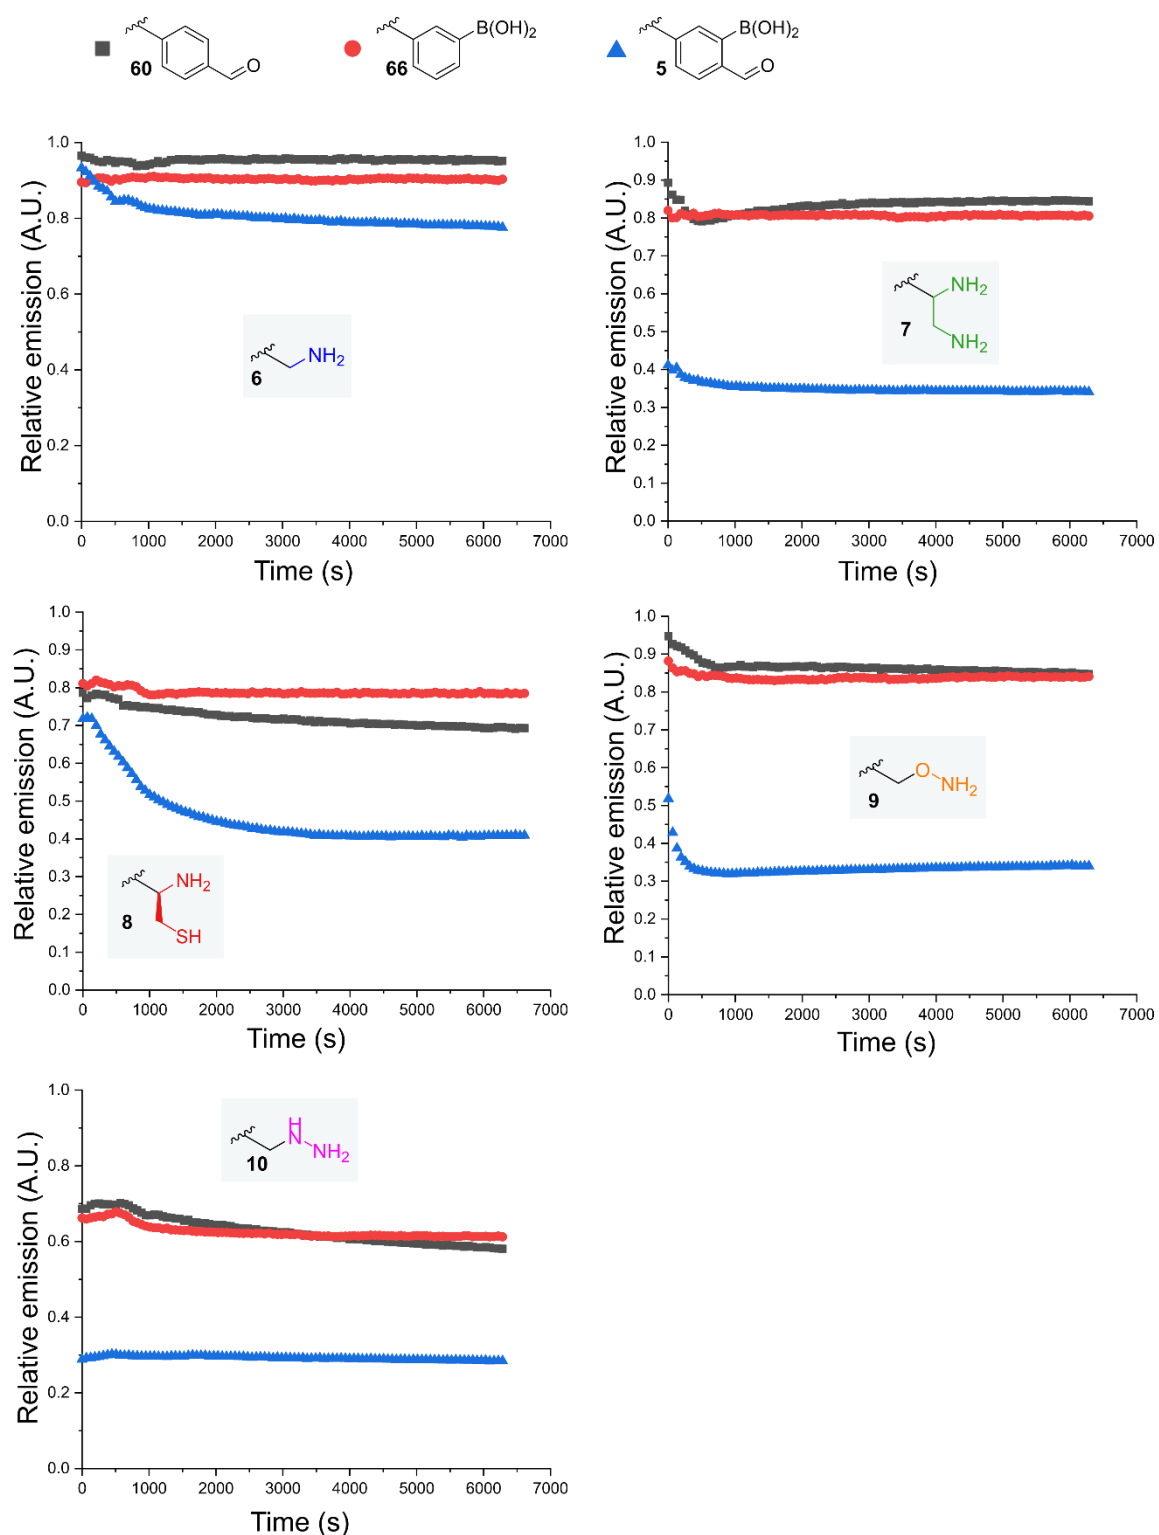

**Figure S1:** Plots of emission at 580 nm over time following the addition of Cy5-nucleophiles **6-10** (50  $\mu$ M) to Cy3-substrates **5** (oBA) and controls **60** (benzaldehyde) and **66** (phenylboronic acid), relative to the emissions of controls containing either Cy3 or Cy5 substrate alone.

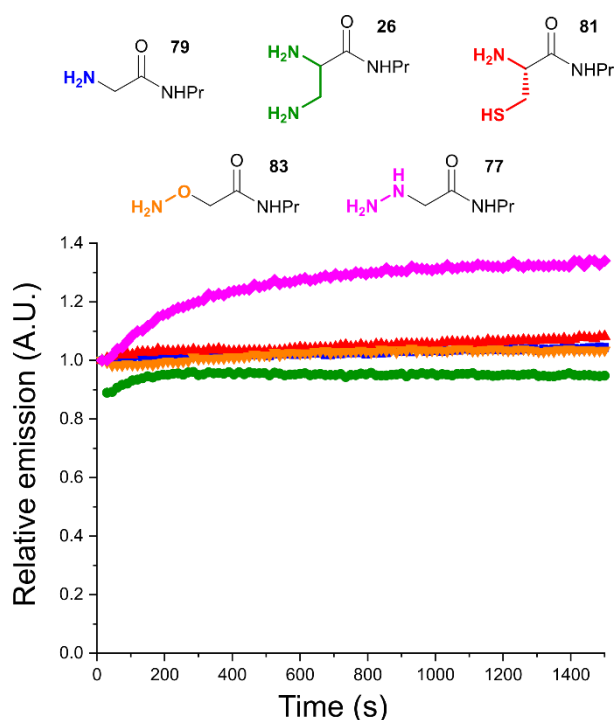

**Figure S2:** Plots of emission at 560 nm over time following the addition of propylamide-capped nucleophiles **26**, **76**, **78**, **80**, or **82** (50  $\mu$ M) to Cy3-oBA **5** (5  $\mu$ M), normalised to the emission at  $t = 3$  seconds (first measurement). In this experiment, the absence of a Cy5-acceptor should mean that no drop in Cy3 emission is observed upon oBID formation. Although an *increase* in emission is observed for the addition of hydrazine **76**, the kinetics of this process are negligible relative to the rate of hydrazone/DAB formation.

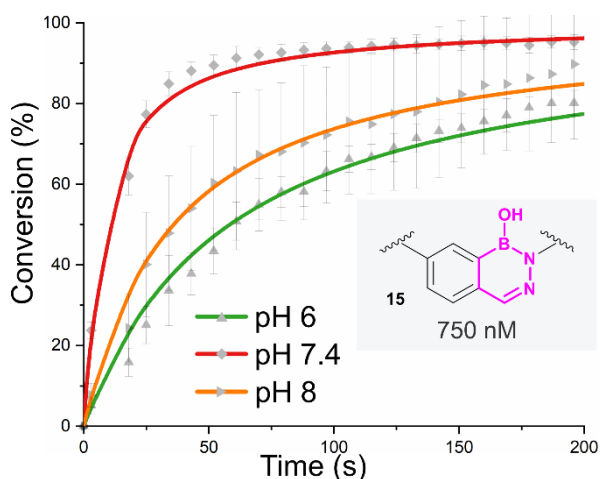

**Figure S3:** Plot of reaction conversion against time for the formation of oBID **15** and from Cy3-oBA **5** and Cy5-hydrazine **10**, at a reduced concentration of 750 nM under second-order conditions. Fits are based on second-order irreversible model, with errors based on the standard deviation of experiments run in triplicate.

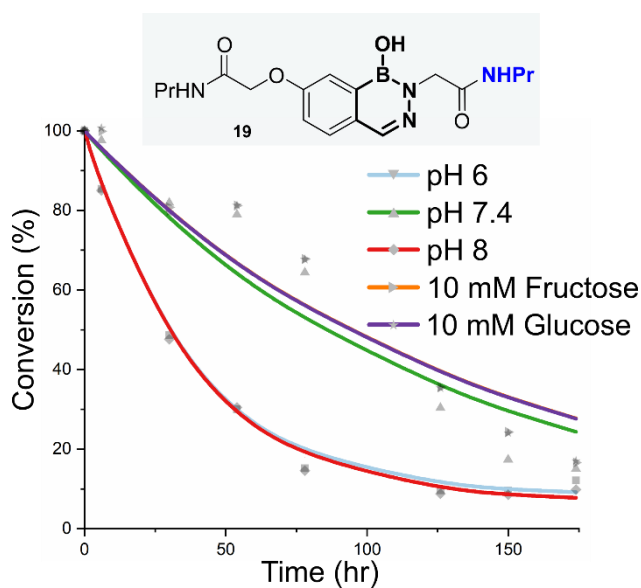

**Figure S4:** Plot of cleavage against time for propyl amide-DAB **19** (370  $\mu$ M) following addition of methyl amide-hydrazine **21** (3700  $\mu$ M) in the stated buffer. Fits are based on the model described in SI Section 10. Nb. Data in the presence of 10 mM glucose and fructose are very similar, leading to overlap of the fits.

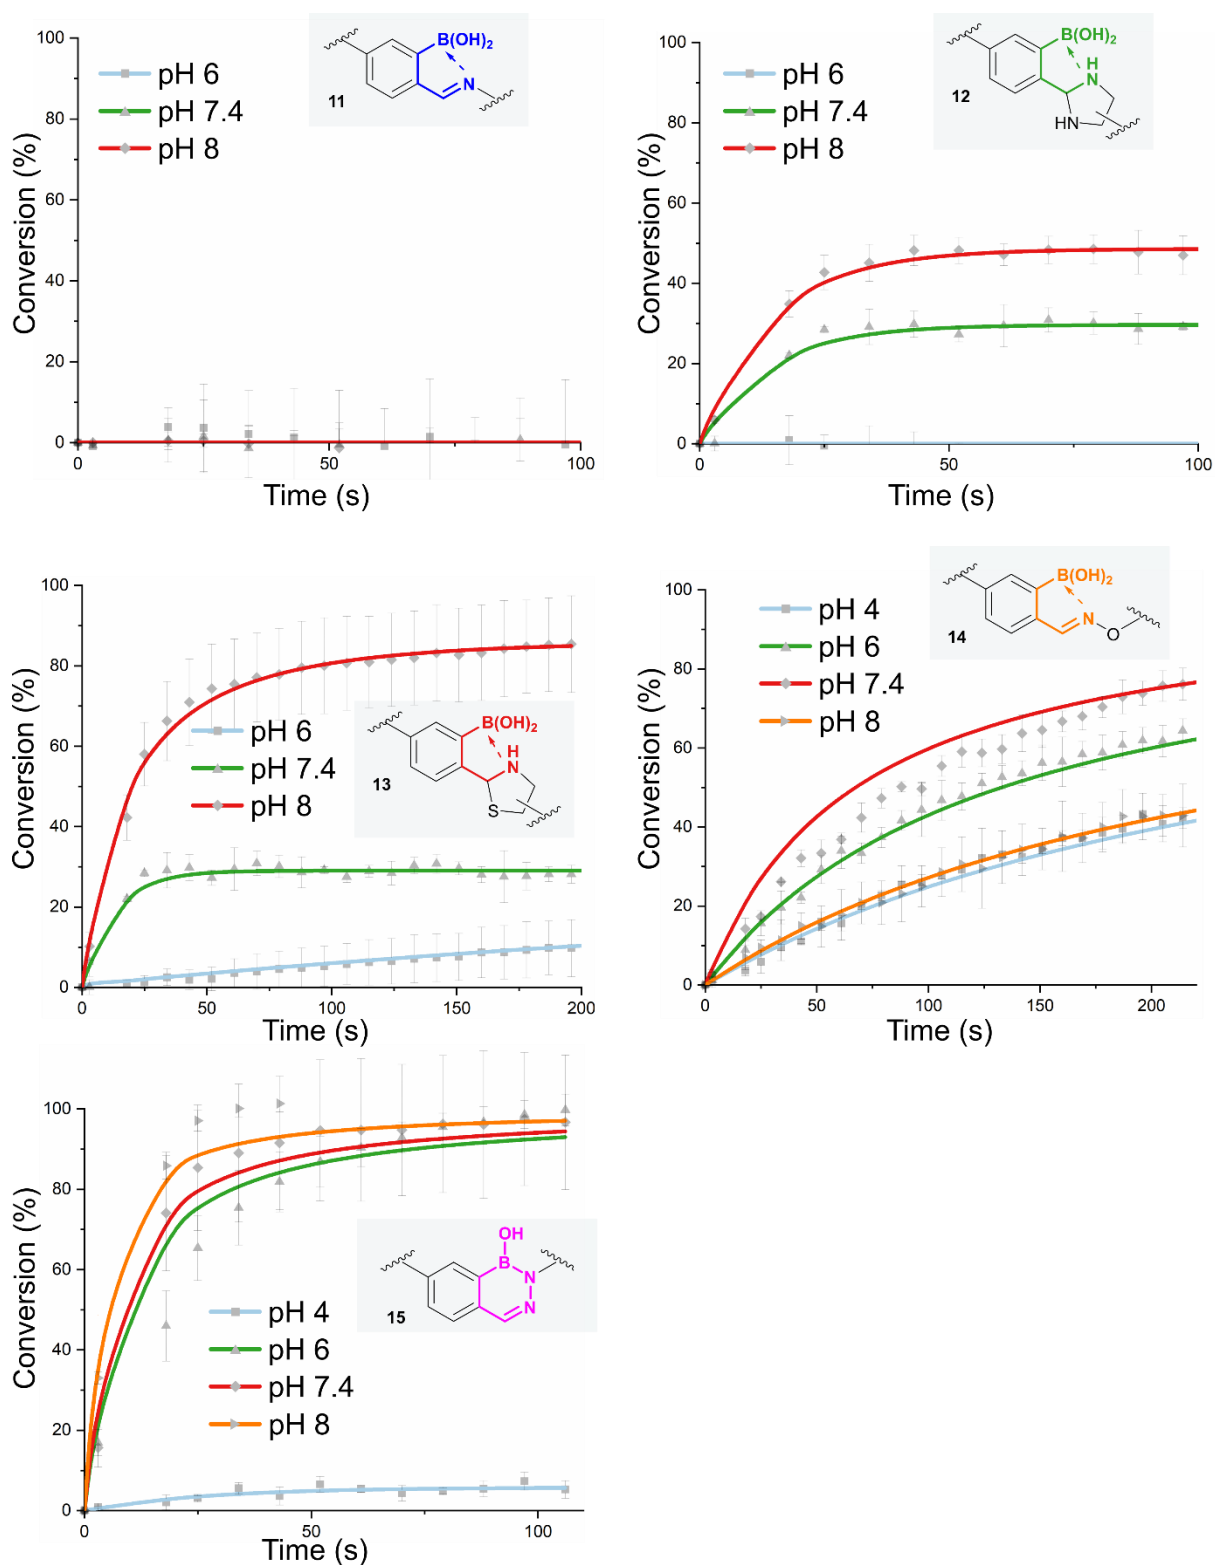

**Figure S5:** Conversion data grouped by nucleophile/structure formed, across range of pHs.

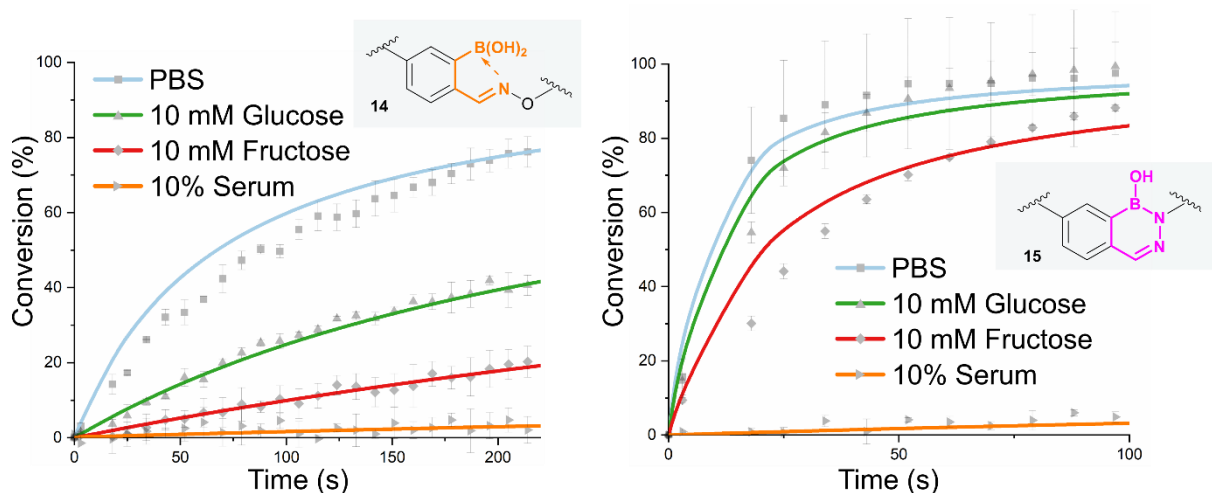

**Figure S6:** Plot of reaction conversion against time for the formation of oBIDs **14** and **15** from Cy3-oBA **5** and the relevant Cy5-nucleophile, in pH 7.4 PBS containing the stated additive. Reactions were run at a concentration of 2.5  $\mu\text{M}$  under second-order conditions. Fits are based on second-order irreversible, or reversible models, with errors based on the standard deviation of experiments run in triplicate.

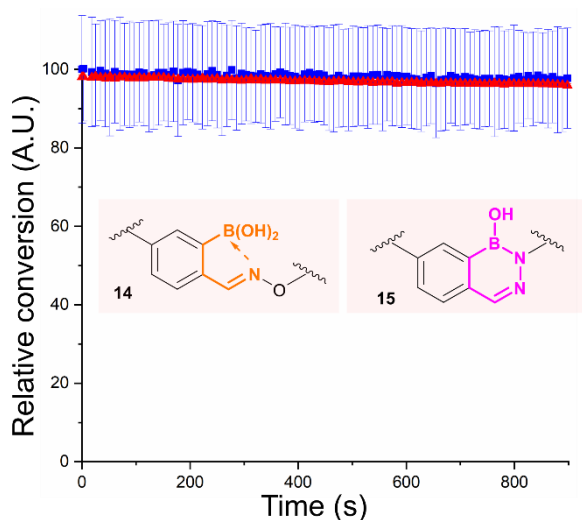

**Figure S7:** Plot of relative stability of **14** and **15** (2.5  $\mu\text{M}$ ), pre-formed in PBS, over time following the addition of 10% bovine serum. The absence of suitable references means it is not possible to calculate absolute conversions, and data is therefore based on changes in FRET ratio over time relative to oBA **5**.

## General considerations

Proton and carbon nuclear magnetic resonance ( $^1\text{H}$  and  $^{13}\text{C}$  NMR respectively) spectra were recorded on a Jeol ECX-400 (400 MHz) or Bruker AVIIIHD (500 MHz) spectrometer. NMR shifts were assigned using COSY, HSQC and HMBC spectra. All chemical shifts are quoted on the  $\delta$  scale in ppm using residual solvent as the internal standard ( $^1\text{H}$  NMR:  $\text{CDCl}_3 = 7.26$ ;  $\text{MeOD} = 3.31$ ;  $\text{D}_2\text{O} = 4.69$ ;  $\text{DMSO}-d_6 = 2.50$  and  $^{13}\text{C}$  NMR:  $\text{CDCl}_3 = 77.16$ ,  $\text{MeOD} = 49.00$ ,  $\text{DMSO}-d_6 = 39.52$ ). Coupling constants ( $J$ ) are reported in Hz with the following splitting abbreviations: s = singlet, d = doublet, t = triplet, q = quartet, m = multiplet, app = apparent, br = broad. Melting points (m.p.) were recorded on a Gallenkamp melting point apparatus. Infrared (IR) spectra were recorded on a Perkin Elmer UATR Two FT-IR spectrometer. Absorption maxima ( $\lambda_{\text{max}}$ ) are reported in wavenumbers ( $\text{cm}^{-1}$ ). UV-Vis spectra were recorded on a Shimadzu UV-1800 UV spectrophotometer in a glass cuvette, using a 480/30 nm excitation filter and a 580/10 nm emission filter, a pathlength of 1 cm, and a sampling interval of 1 nm. 96-well plate fluorescence measurements were recorded on a PerkinElmer VICTOR Nivo Multimode Plate Reader. Fluorescence spectra were recorded on a Shimadzu RF-5301PC spectrofluorophotometer in a glass fluorescence cuvette with a pathlength of 1 cm, a sampling interval of 1 nm, and excitation and emission slit widths of 5 nm. High resolution electrospray ionisation (ESI) mass spectra (HRMS) were recorded on a Bruker Compact TOF-MS or a Jeol AccuTOF GCx-plus spectrometer. Nominal and exact  $m/z$  values are reported in Daltons.

Thin layer chromatography (TLC) was carried out using aluminium backed sheets coated with 60 F<sub>254</sub> silica gel (Merck). Visualization of the silica plates was achieved using a UV lamp ( $\lambda_{\text{max}} = 254, 302, \text{ or } 366 \text{ nm}$ ), and/or ammonium molybdate (5% in 2M  $\text{H}_2\text{SO}_4$ ), and/or potassium permanganate (5%  $\text{KMnO}_4$  in 1M  $\text{NaOH}$  with 5% potassium carbonate), and/or ninhydrin (1.5% ninhydrin, 3%  $\text{AcOH}$  in *n*-butanol), and/or bromocresol green (0.4% bromocresol green in ethanol, basified till blue with 0.1 M  $\text{NaOH}$ ). Flash column chromatography was carried out using Geduran Si 60 (40-63  $\mu\text{m}$ ) (Merck). Mobile phases are reported as ratios of more polar solvent to less polar solvent. Anhydrous solvents were dried over a PureSolv MD 7 Solvent Purification System. Deionized water was used for chemical reactions. All other solvents were used as supplied (Analytical or HPLC grade), without prior purification. Reagents were purchased from Sigma-Aldrich and used as supplied, unless otherwise

indicated. Brine refers to a saturated solution of sodium chloride. Petrol refers to the fraction of petroleum ether boiling in the range 40-60 °C. Anhydrous magnesium sulfate ( $\text{MgSO}_4$ ) was used as the drying agent after reaction workup unless otherwise stated.

Liquid chromatography-mass spectrometry (LC-MS) was performed on a HCTultra ETD II ion trap spectrometer, coupled to an Ultimate300 HPLC using an Accucore C18 column (150 × 2.1 mm, 2.6  $\mu\text{m}$  particle size). Water (solvent A) and acetonitrile (solvent B), both containing 0.1% formic acid, were used as the mobile phase at a flow rate of 0.3 mL min<sup>-1</sup>. LC traces were measured via UV absorption at 220, 270, and 280. The gradient was programmed as shown below:

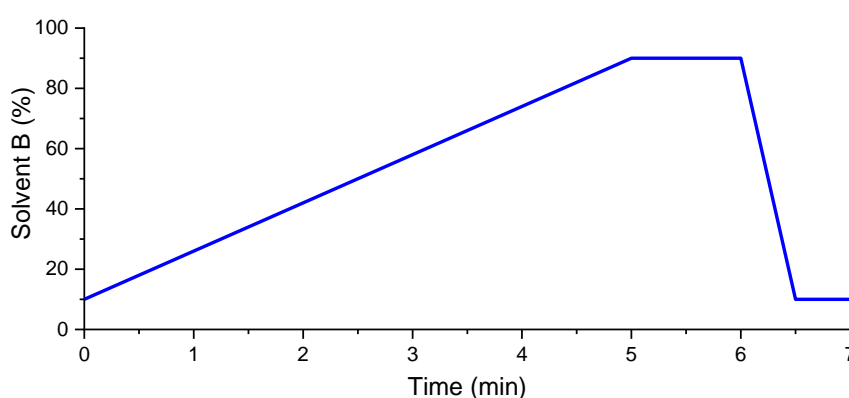

## 1. Core dye synthesis

### Numbering system for Cy3/5 NMR assignments

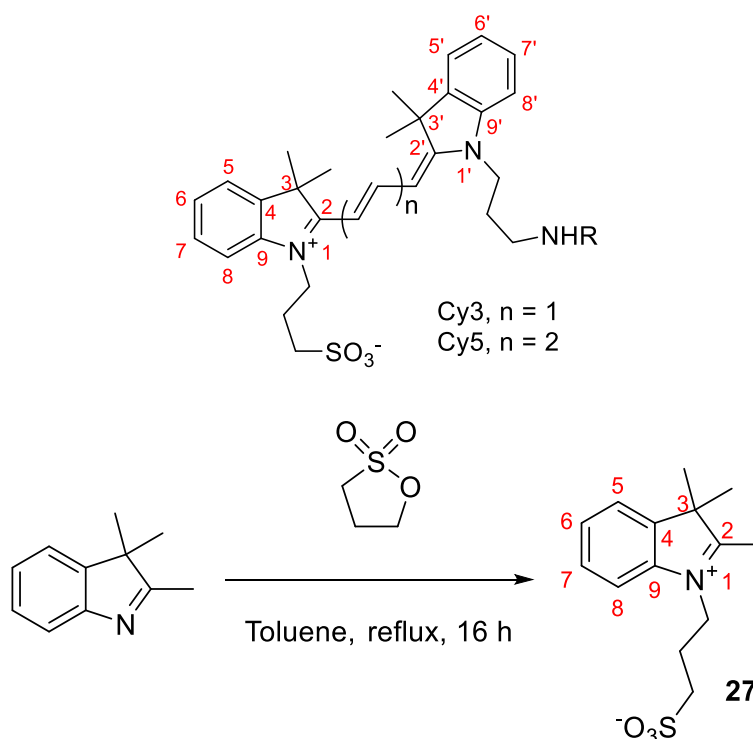

A mixture of 2,3,3-trimethylindolenine (2.00 mL, 12.7 mmol) and 1,3-propanesultone (1.55 g, 12.7 mmol) in toluene (50 mL) was refluxed for 20 h, during which time a dark red precipitate formed. After cooling to r.t., the reaction mixture was concentrated under reduced pressure. The residue was redissolved in dichloromethane (5 mL) and the solution added dropwise to diethyl ether (200 mL). The resultant precipitate was collected by filtration, washed with diethyl ether (50 mL), and dried in air to yield a red oil (3.10 g, 11.0 mmol, 87%). Data were consistent with those previously reported.<sup>1</sup>

**<sup>1</sup>H NMR** (400 MHz, CD<sub>3</sub>OD)  $\delta$  = 8.01-7.93 (m, 1H, H<sub>5</sub>), 7.78-7.70 (m, 1H, H<sub>7</sub>), 7.68-7.59 (m, 2H, H<sub>6</sub>, H<sub>8</sub>), 4.78-4.67 (m, 2H, PhCHH<sub>2</sub>), 3.03-2.93 (m, 2H, CH2SO<sub>3</sub><sup>-</sup>), 2.43-2.26 (m, 2H, CH2CH<sub>2</sub>SO<sub>3</sub><sup>-</sup>), 1.58 (s, 6H, 2 × CH<sub>3</sub>); **HRMS**: *m/z* (ESI<sup>+</sup>) calc. for C<sub>14</sub>H<sub>19</sub>NO<sub>3</sub>S [M+H]<sup>+</sup>: 282.1158; Obs.: 282.1162;  **$\nu_{\text{max}}$** : (FT-ATR)/cm<sup>-1</sup>: 3426, 2989, 1641, 1460, 1212, 1160, 1035, 758, 522.

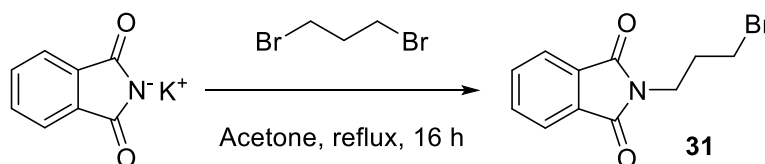

Potassium phthalimide (1.85 g, 10.0 mmol) was added in portions over 5 min to a stirred solution of 1,3-dibromopropane (1.00 mL, 10.0 mmol) in acetone (50 mL). The solution was then refluxed for 18 h. After cooling to r.t., the reaction mixture was filtered under vacuum, and the filtrate concentrated under reduced pressure. The residue was purified via flash column chromatography on silica gel, eluting with EtOAc:petrol (3:8). Fractions containing the product were concentrated under reduced pressure to provide a white solid (1.17 g, 4.38 mmol, 44%). Data were consistent with those previously reported.<sup>2</sup>

**R<sub>f</sub>**: 0.21 (2:8, EtOAc:petrol, UV active); **<sup>1</sup>H NMR** (400 MHz, CD<sub>3</sub>OD)  $\delta$  = 7.91-7.79 (m, 2H, PhthH<sub>2</sub>), 7.78-7.66 (m, 2H, PhthH<sub>3</sub>), 3.83 (t, *J* = 6.8 Hz, 2H, CH2N), 3.41 (t, *J* = 6.8 Hz, 2H, CH2Br), 2.25 (tt, *J*<sub>1</sub> = *J*<sub>2</sub> = 6.8 Hz, 2H, CH2CH<sub>2</sub>Br); **HRMS**: *m/z* (ESI<sup>+</sup>) calc. for C<sub>11</sub>H<sub>10</sub><sup>79</sup>BrNO<sub>2</sub> [<sup>79</sup>M+Na]<sup>+</sup>: 289.9787; Obs.: 289.9774;  **$\nu_{\text{max}}$** : (FT-ATR)/cm<sup>-1</sup>: 3454, 2985, 1765, 1705, 1442, 1406, 1375, 1230, 1055, 966, 870, 723; **m.p.**: 71-74 °C.

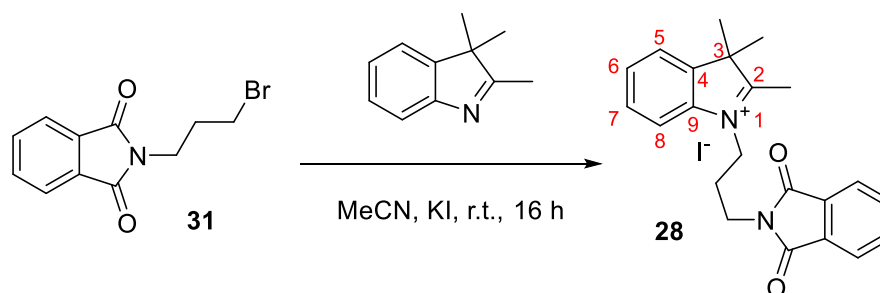

Potassium iodide (744 mg, 4.48 mmol) was added to a stirred solution of 2,3,3-trimethylindolenine (710  $\mu$ L, 4.48 mmol), and **31** (1.00 g, 3.73 mmol) in anhydrous acetonitrile (20 mL) under an argon atmosphere. The resulting mixture was refluxed for 5 h. After cooling to r.t., the reaction was filtered under vacuum and the filtrate concentrated under reduced pressure. The residue was then redissolved in acetone (10 mL) and the solution added dropwise to diethyl ether (200 mL). The resultant brown precipitate was collected by filtration, washed with diethyl ether (30 mL) and dried in air. The solid was then redissolved in acetone (10 mL) and concentrated under reduced pressure to afford the product as a brown solid (878 mg, 2.53 mmol, 68%).

**R<sub>f</sub>**: 0.29 (1:9, MeOH:CH<sub>2</sub>Cl<sub>2</sub>, UV active); **<sup>1</sup>H NMR** (400 MHz, CD<sub>3</sub>OD)  $\delta$  = 7.89-7.85 (m, 1H, H5), 7.84-7.80 (m, 2H, PhthH2), 7.79-7.73 (m, 3H, PhthH3, H7), 7.64-7.55 (m, 2H, H8, H6), 4.64 (t,  $J$  = 7.0 Hz, 2H, CH<sub>2</sub>N<sup>+</sup>), 3.88 (t,  $J$  = 7.0 Hz, 2H, CH<sub>2</sub>NPhth), 2.37 (tt,  $J_1 = J_2 = 7.0$  Hz, 2H, CH<sub>2</sub>CH<sub>2</sub>N), 1.61 (s, 6H, 2  $\times$  CH<sub>3</sub>); **<sup>13</sup>C NMR** (400 MHz, CD<sub>3</sub>OD)  $\delta$  = 168.5 (PhthCON), 142.0 (C9), 141.2 (C4), 134.2 (PhthC2), 132.0 (PhthC1), 129.9 (C7), 129.2 (C6), 123.4 (PhthC3), 123.0 (C5), 115.1 (C8), 46.1 (CH<sub>2</sub>NPhth), 34.8 (CH<sub>2</sub>CH<sub>2</sub>CH<sub>2</sub>NPhth), 26.5 (CH<sub>2</sub>CH<sub>2</sub>NPhth), 21.5 (CyCH<sub>3</sub>); **HRMS**:  $m/z$  (ESI<sup>+</sup>) calc. for C<sub>22</sub>H<sub>22</sub>N<sub>2</sub>O<sub>2</sub> [M]<sup>+</sup>: 347.1754; Obs.: 347.1761;  **$\nu_{\text{max}}$** : (FT-ATR)/cm<sup>-1</sup>: 3441, 2976, 1769, 1707, 1608, 1463, 1398, 765, 721, 530; **m.p.**: 176-179 °C.

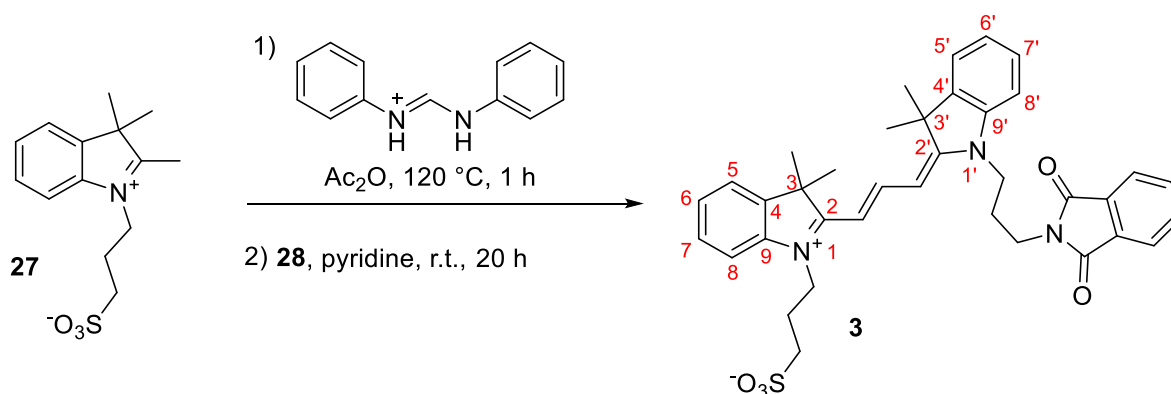

A mixture of **27** (3.10 g, 11.0 mmol) and *N,N*-diphenylformamidine (2.17 g, 11.0 mmol) in acetic anhydride (10 mL) was heated to 120 °C for 1 h. After the reaction mixture was cooled to r.t., a solution of **28** (3.44 g, 9.91 mmol) in pyridine (10 mL) was added and the mixture stirred at r.t. for a further 20 h. After this time, the mixture was added dropwise to diethyl ether (500 mL). The resultant precipitate was collected by filtration, washed with diethyl ether (30 mL), and dried in air. The solid was then redissolved in methanol (20 mL) and concentrated under reduced pressure. The residue was purified via flash column chromatography on silica gel, eluting with MeOH:CH<sub>2</sub>Cl<sub>2</sub> (5:95). Fractions containing the product were concentrated under reduced pressure to provide a pink powder (2.65 g, 4.16 mmol, 42%).

**R<sub>f</sub>**: 0.16 (1:9, MeOH:CH<sub>2</sub>Cl<sub>2</sub>, visible light active); **<sup>1</sup>H NMR** (400 MHz, DMSO-*d*<sub>6</sub>) δ = 8.32 (dd, *J*<sub>1</sub> = *J*<sub>2</sub> = 13.4 Hz, 1H, CHCHCN), 7.84-7.75 (m, 4H, PhthH<sub>2</sub>, PhthH<sub>3</sub>), 7.62-7.54 (m, 3H, H<sub>5</sub>, H<sub>5'</sub>, H<sub>8</sub>/H<sub>8'</sub>), 7.45-7.35 (m, 3H, H<sub>7</sub>, H<sub>7'</sub>, H<sub>8</sub>/H<sub>8'</sub>), 7.25 (ddd, *J*<sub>1</sub> = *J*<sub>2</sub> = 7.5 Hz, *J*<sub>3</sub> = 2.8 Hz, 2H, H<sub>6</sub>, H<sub>6'</sub>), 6.50 (d, *J* = 13.4 Hz, 2H, CHCN), 4.26-4.18 (m, 4H, CH<sub>2</sub>CH<sub>2</sub>CH<sub>2</sub>SO<sub>3</sub><sup>-</sup>, CH<sub>2</sub>CH<sub>2</sub>CH<sub>2</sub>NPhth), 3.69 (t, *J* = 7.1 Hz, 2H, CH<sub>2</sub>NPhth), 2.52 (t, *J* = 7.4 Hz, 2H, CH<sub>2</sub>SO<sub>3</sub><sup>-</sup>), 2.08 (tt, *J*<sub>1</sub> = *J*<sub>2</sub> = 7.1 Hz, 2H, CH<sub>2</sub>CH<sub>2</sub>NPhth), 2.00 (tt, *J*<sub>1</sub> = *J*<sub>2</sub> = 7.4 Hz, 2H, CH<sub>2</sub>CH<sub>2</sub>SO<sub>3</sub><sup>-</sup>), 1.67 (s, 12H, CyCH<sub>3</sub>); **<sup>13</sup>C NMR** (101 MHz, DMSO-*d*<sub>6</sub>) δ = 174.9 (CHCHCN), 174.6 (C<sub>2</sub>, C<sub>2'</sub>), 168.4 (PhthCON), 151.1 (C<sub>3</sub>, C<sub>3'</sub>), 141.9 (C<sub>9</sub>, C<sub>9'</sub>), 140.9 (C<sub>4</sub>, C<sub>4'</sub>), 134.1 (PhthC<sub>2</sub>), 132.1 (PhthC<sub>1</sub>), 128.7 (C<sub>7</sub>, C<sub>7'</sub>), 125.6 (C<sub>6</sub>, C<sub>6'</sub>), 123.9 (PhthC<sub>3</sub>), 122.2 (C<sub>5</sub>, C<sub>5'</sub>), 111.3 (C<sub>8</sub>/C<sub>8'</sub>), 111.0 (C<sub>8</sub>/C<sub>8'</sub>), 103.8 (CHCN), 103.7 (CHCN), 49.4 (CH<sub>2</sub>SO<sub>3</sub><sup>-</sup>), 42.7 (CH<sub>2</sub>CH<sub>2</sub>CH<sub>2</sub>SO<sub>3</sub><sup>-</sup>), 41.6 (CH<sub>2</sub>NPhth), 35.1 (CH<sub>2</sub>CH<sub>2</sub>CH<sub>2</sub>NPhth), 27.6 (CH<sub>2</sub>CH<sub>2</sub>NPhth), 26.1 (CyCH<sub>3</sub>), 22.8 (CH<sub>2</sub>CH<sub>2</sub>SO<sub>3</sub><sup>-</sup>); **HRMS**: *m/z* (ESI<sup>+</sup>) calc. for C<sub>37</sub>H<sub>39</sub>N<sub>3</sub>O<sub>5</sub>S [M+H]<sup>+</sup>: 638.2683; Obs.: 638.2695; **ν<sub>max</sub>**: (FT-ATR)/cm<sup>-1</sup>: 3443, 2975, 2930, 1709, 1555, 1428, 1373, 1152, 1037, 929, 759, 723; **m.p.**: 272-276 °C.

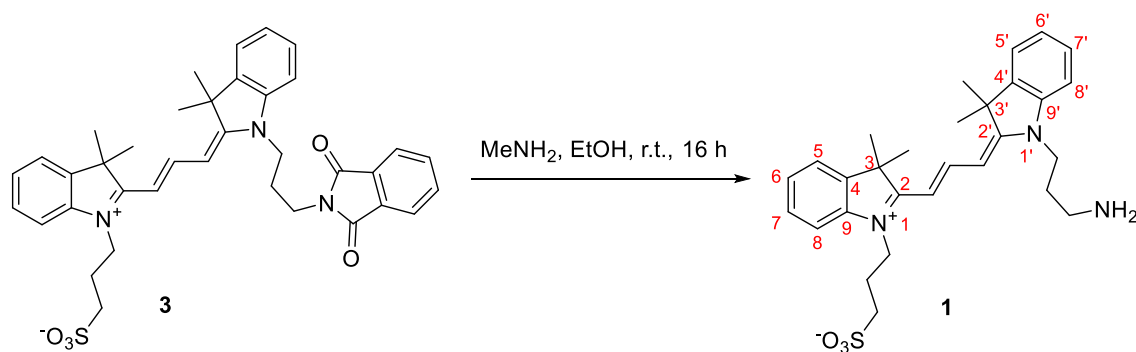

A mixture of methylamine (40% in methanol, 30 mL) and **3** (500 mg, 0.78 mmol) in methanol (5 mL) was stirred at r.t. for 16 h. The reaction mixture was then concentrated under reduced pressure to ~5 mL, and the solution added dropwise to diethyl ether (400 mL). The resultant precipitate was collected by filtration, washed with diethyl ether (30 mL) and dried in air. The solid was then redissolved in methanol (20 mL) and concentrated under reduced pressure to give a pink solid (498 mg, 0.78 mmol, quantitative yield).

**R<sub>f</sub>**: 0.18 (1:9, MeOH:CH<sub>2</sub>Cl<sub>2</sub>, visible light active); **<sup>1</sup>H NMR** (400 MHz, CD<sub>3</sub>OD) δ = 8.52 (dd, *J*<sub>1</sub> = *J*<sub>2</sub> = 13.5 Hz, 1H, CHCHCN), 7.53 (d, *J* = 7.5 Hz, 2H, H5, H5'), 7.45-7.30 (m, 4H, H7, H7', H8, H8'), 7.34-7.22 (m, 2H, H6, H6'), 6.82 (d, *J* = 13.5 Hz, 1H, CHCN), 6.60 (d, *J* = 13.5 Hz, 1H, CHCN), 4.41 (t, *J* = 7.7 Hz, 2H, CH<sub>2</sub>CH<sub>2</sub>CH<sub>2</sub>SO<sub>3</sub><sup>-</sup>), 4.27 (t, *J* = 7.7 Hz, 2H, CH<sub>2</sub>CH<sub>2</sub>CH<sub>2</sub>NH<sub>2</sub>), 3.21 (t, *J* = 7.7 Hz, 2H, CH<sub>2</sub>NH<sub>2</sub>), 3.02 (t, *J* = 7.7 Hz, 2H, CH<sub>2</sub>SO<sub>3</sub><sup>-</sup>), 2.29-2.23 (m, 2H, CH<sub>2</sub>CH<sub>2</sub>NH<sub>2</sub>), 2.20-2.16 (m, 2H, CH<sub>2</sub>CH<sub>2</sub>SO<sub>3</sub><sup>-</sup>), 1.73 (s, 12H, CyCH<sub>3</sub>); **<sup>13</sup>C NMR** (101 MHz, CD<sub>3</sub>OD) δ = 174.8 (CHCHCN), 174.5 (C2, C2'), 151.0 (C3, C3'), 141.9 (C9, C9'), 140.9 (C4, C4'), 128.8 (C7, C7'), 125.5 (C6, C6'), 122.3 (C5, C5'), 111.3 (C8/C8'), 111.1, (C8/C8'), 103.1 (CHCN<sup>+</sup>), 102.8 (CHCN), 49.3 (CH<sub>2</sub>SO<sub>3</sub><sup>-</sup>), 42.6 (CH<sub>2</sub>CH<sub>2</sub>CH<sub>2</sub>SO<sub>3</sub><sup>-</sup>), 41.5 (CH<sub>2</sub>NH<sub>2</sub>), 37.9 (CH<sub>2</sub>CH<sub>2</sub>CH<sub>2</sub>NH<sub>2</sub>), 28.1 (CH<sub>2</sub>CH<sub>2</sub>NH<sub>2</sub>), 27.0 (CyCH3), 23.0 (CH<sub>2</sub>CH<sub>2</sub>SO<sub>3</sub><sup>-</sup>); **HRMS**: *m/z* (ESI<sup>+</sup>) calc. for C<sub>29</sub>H<sub>36</sub>N<sub>3</sub>O<sub>3</sub>S [M+H]<sup>+</sup>: 508.2636; Obs.: 508.2636; **ν<sub>max</sub>**: (FT-ATR)/cm<sup>-1</sup>: 3437, 2975, 1711, 1556, 1429, 1207, 1147, 1037, 971, 930, 758; **m.p.**: >325 °C.

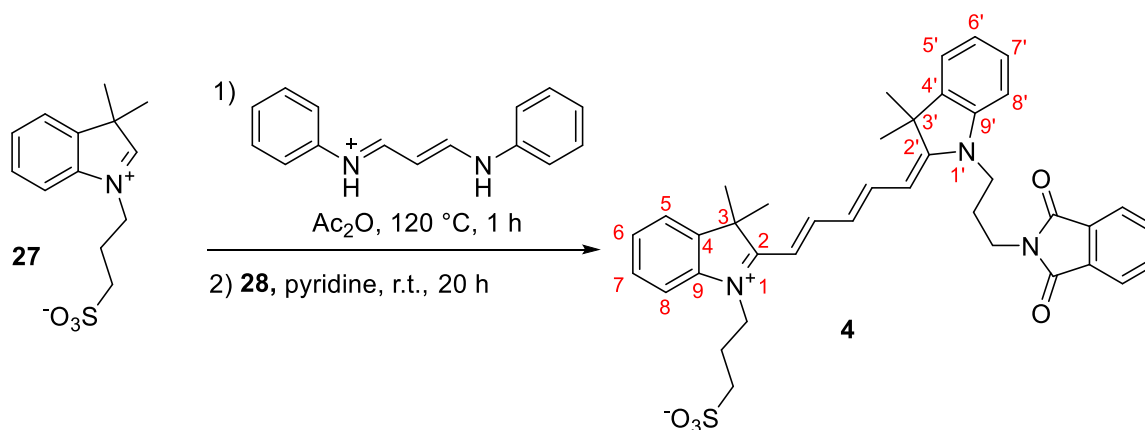

A mixture of **27** (2.00 g, 7.12 mmol) and malonaldehyde bis(phenylimine) monohydrochloride (1.75 g, 7.83 mmol) in acetic anhydride (10 mL) was heated to 120 °C for 1.5 h. After cooling to r.t., a solution of **28** (2.25 g, 6.48 mmol) in pyridine (10 mL) was added and stirring was continued at r.t. for a further 16 h. The reaction mixture was then concentrated under reduced pressure to ~5 mL, and the remaining solution

added dropwise to diethyl ether (200 mL). The resultant precipitate was collected by filtration, washed with diethyl ether (30 mL), and dried in air. The solid was then redissolved in methanol (10 mL) and concentrated under reduced pressure. The residue was purified via flash column chromatography on silica gel eluting with MeOH:CH<sub>2</sub>Cl<sub>2</sub> (5:95). Fractions containing the product were concentrated under reduced pressure to provide a blue solid (1.35 g, 2.04 mmol, 29%).

**R<sub>f</sub>**: 0.29 (5:95, MeOH:CH<sub>2</sub>Cl<sub>2</sub>, visible light active); **<sup>1</sup>H NMR** (400 MHz, DMSO-*d*<sub>6</sub>) δ = 8.28 (dd, *J* = 13.2, 10.1 Hz, 2H, 2 × CHCHCN), 7.85-7.75 (m, 4H, PhthH<sub>2</sub>, PhthH<sub>3</sub>), 7.56 (d, *J* = 7.4 Hz, 1H, H<sub>5</sub>/H<sub>5'</sub>), 7.53 (d, *J* = 7.4 Hz, 1H, H<sub>5</sub>/H<sub>5'</sub>), 7.46 (d, *J* = 7.9 Hz, 1H, H<sub>8</sub>/H<sub>8'</sub>), 7.38-7.32 (m, 2H, H<sub>7</sub>, H<sub>7'</sub>), 7.29 (d, *J* = 7.9 Hz, 1H, H<sub>8</sub>/H<sub>8'</sub>), 7.20 (dd, *J* = 7.4 Hz, 1H, H<sub>6</sub>/H<sub>6'</sub>), 7.15 (dd, *J* = 7.4 Hz, 1H, H<sub>6</sub>/H<sub>6'</sub>), 6.45-6.33 (m, 2H, CHCHCHCN, CHCN), 6.20 (d, *J* = 13.2 Hz, 1H, CHCN), 4.34-4.22 (m, 2H, CH<sub>2</sub>CH<sub>2</sub>CH<sub>2</sub>SO<sub>3</sub><sup>-</sup>), 4.17 (t, *J* = 7.2 Hz, 2H, CH<sub>2</sub>CH<sub>2</sub>CH<sub>2</sub>NPhth), 3.67 (t, *J* = 7.2 Hz, 2H, CH<sub>2</sub>NPhth), 2.57 (t, *J* = 6.8 Hz, 2H, CH<sub>2</sub>SO<sub>3</sub><sup>-</sup>), 2.05-1.95 (m, 4H, CH<sub>2</sub>CH<sub>2</sub>NPhth, CH<sub>2</sub>CH<sub>2</sub>SO<sub>3</sub><sup>-</sup>), 1.62 (s, 12H, CyCH<sub>3</sub>); **<sup>13</sup>C NMR** (101 MHz, DMSO-*d*<sub>6</sub>) δ = 173.8 (C<sub>2</sub>, C<sub>2'</sub>), 172.5 (C<sub>3</sub>, C<sub>3'</sub>), 168.5 (CON), 155.1 (CHCHCN), 154.3 (CHCHCN), 142.6 (C<sub>9</sub>/C<sub>9'</sub>), 142.5 (C<sub>9</sub>/C<sub>9'</sub>), 141.7 (C<sub>4</sub>/C<sub>4'</sub>), 141.5 (C<sub>4</sub>/C<sub>4'</sub>), 134.9 (PhthC<sub>2</sub>), 132.3 (PhthC<sub>1</sub>), 129.0 (C<sub>7</sub>/C<sub>7'</sub>), 128.9 (C<sub>7</sub>/C<sub>7'</sub>), 126.1 (CHCHCHCN), 125.5 (C<sub>6</sub>/C<sub>6'</sub>), 125.0 (C<sub>6</sub>/C<sub>6'</sub>), 123.6 (PhthC<sub>3</sub>), 123.0 (C<sub>5</sub>, C<sub>5'</sub>), 111.9 (C<sub>8</sub>/C<sub>8'</sub>), 111.3 (C<sub>8</sub>/C<sub>8'</sub>), 104.3 (CHCN), 103.3 (CHCN), 48.4 (CH<sub>2</sub>SO<sub>3</sub><sup>-</sup>), 43.3 (CH<sub>2</sub>CH<sub>2</sub>CH<sub>2</sub>SO<sub>3</sub><sup>-</sup>), 41.5 (CH<sub>2</sub>CH<sub>2</sub>CH<sub>2</sub>NPhth), 35.6 (CH<sub>2</sub>NCO), 27.6 (CyCH<sub>3</sub>), 26.5 (CH<sub>2</sub>CH<sub>2</sub>NPhth), 24.0 (CH<sub>2</sub>CH<sub>2</sub>SO<sub>3</sub><sup>-</sup>); **HRMS**: *m/z* (ESI<sup>+</sup>) calc. for C<sub>39</sub>H<sub>41</sub>N<sub>3</sub>O<sub>5</sub>S [M+H]<sup>+</sup>: 664.2840; Obs.: 664.2858; **ν<sub>max</sub>**: (FT-ATR)/cm<sup>-1</sup>: 3442, 2973, 1770, 1709, 1492, 1455, 1381, 1337, 1132, 1108, 1034, 1017, 927, 795, 721, 530; **m.p.**: 264-269 °C.

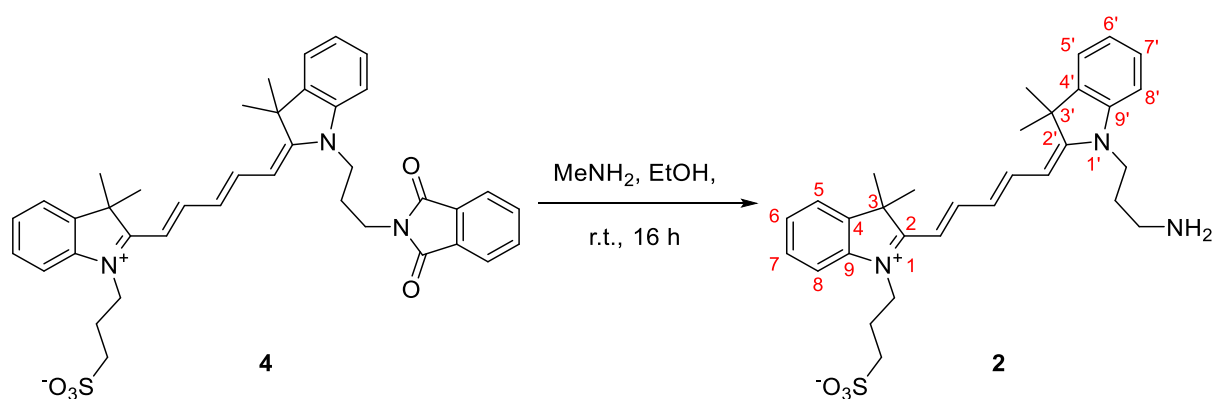

Methylamine (40% in water, 30 mL) was added to a solution of **4** (200 mg, 0.30 mmol) in ethanol (5 mL) and the solution stirred at r.t. for 16 h. The reaction mixture was then concentrated under reduced pressure to ~5 mL, and the remaining solution added dropwise to diethyl ether (400 mL). The resultant precipitate was collected by filtration, washed with diethyl ether (30 mL) and dried in air. The solid was then redissolved in methanol (20 mL) and concentrated under reduced pressure to give the product as a blue solid (159 mg, 0.298 mmol, 99%).

Nb. Attempts to cleave the phthalimide with traditional hydrazinolysis were unsuccessful, with a loss of colour over a period of 1 h indicating a loss of conjugation/dye structure.

**R<sub>f</sub>**: 0.17 (1:9, MeOH:CH<sub>2</sub>Cl<sub>2</sub>, visible light active). **<sup>1</sup>H NMR** (400 MHz, CD<sub>3</sub>OD) δ = 8.21 (d, *J* = 13.2 Hz 2H, CHCHCN), 7.49-7.43 (m, 2H, H<sub>5</sub>, H<sub>5'</sub>), 7.41-7.34 (m, 3H, H<sub>7</sub>, H<sub>7'</sub>, H<sub>8</sub>/H<sub>8'</sub>), 7.27-7.17 (m, 3H, H<sub>6</sub>, H<sub>6'</sub>, H<sub>8</sub>/H<sub>8'</sub>), 6.69-6.65 (m, 1H, CHCHCHCN), 6.62-6.58 (m, 1H, CHCN), 6.33-6.28 (m, 1H, CHCN), 4.35 (t, *J* = 8.0 Hz, 2H, CH<sub>2</sub>CH<sub>2</sub>CH<sub>2</sub>SO<sub>3</sub><sup>-</sup>), 4.22-4.10 (m, 2H, CH<sub>2</sub>CH<sub>2</sub>CH<sub>2</sub>NH<sub>2</sub>), 3.02-2.94 (m, 4H, CH<sub>2</sub>NH<sub>2</sub>, CH<sub>2</sub>SO<sub>3</sub><sup>-</sup>), 2.24-2.18 (m, 2H, CH<sub>2</sub>CH<sub>2</sub>SO<sub>3</sub><sup>-</sup>), 2.10-2.00 (m, 2H, CH<sub>2</sub>CH<sub>2</sub>NH<sub>2</sub>), 1.66 (s, 12H, CyCH<sub>3</sub>); **<sup>13</sup>C NMR** (101 MHz, CD<sub>3</sub>OD) δ = 174.7 (C<sub>2</sub>, C<sub>2'</sub>), 170.9 (C<sub>3</sub>/C<sub>3'</sub>), 170.3 (C<sub>3</sub>/C<sub>3'</sub>), 155.1 (CHCHCN), 154.1 (CHCHCN), 142.8 (C<sub>9</sub>/C<sub>9'</sub>), 142.1 (C<sub>9</sub>/C<sub>9'</sub>), 141.4, (C<sub>4</sub>, C<sub>4'</sub>), 128.5 (C<sub>7</sub>, C<sub>7'</sub>), 125.9 (CHCHCHCN), 125.0 (C<sub>6</sub>, C<sub>6'</sub>), 123.3 (C<sub>5</sub>, C<sub>5'</sub>), 122.1 (C<sub>7</sub>, C<sub>7'</sub>), 110.8 (C<sub>8</sub>, C<sub>8'</sub>), 103.4 (CHCN), 102.9 (CHCN), 49.1 (CH<sub>2</sub>SO<sub>3</sub><sup>-</sup>), 42.7 (CH<sub>2</sub>CH<sub>2</sub>CH<sub>2</sub>SO<sub>3</sub><sup>-</sup>), 41.7 (CH<sub>2</sub>CH<sub>2</sub>CH<sub>2</sub>NH<sub>2</sub>), 36.7 (CH<sub>2</sub>NH<sub>2</sub>), 28.8 (CyCH<sub>3</sub>), 26.6 (CH<sub>2</sub>CH<sub>2</sub>NH<sub>2</sub>), 22.9 (CH<sub>2</sub>CH<sub>2</sub>SO<sub>3</sub><sup>-</sup>); **HRMS**: *m/z* (ESI<sup>+</sup>) calc. for C<sub>31</sub>H<sub>39</sub>N<sub>3</sub>O<sub>3</sub>S [M+H]<sup>+</sup>: 534.2785; Obs.: 534.2803; **ν<sub>max</sub>**: (FT-ATR)/cm<sup>-1</sup>: 3438, 2968, 2937, 1573, 1482, 1454, 1381, 1338, 1136, 1105, 1035, 1017, 927, 800, 752, 709, 525; **m.p.**: 252-256 °C.

## 2. Synthesis of reactive handles

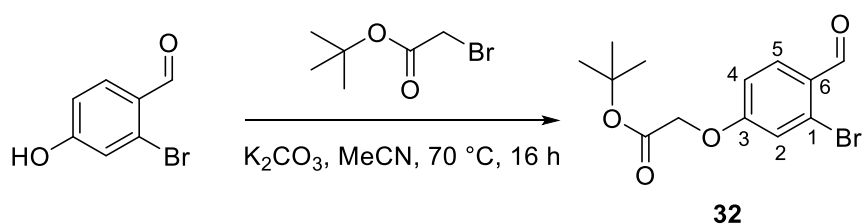

A mixture of 2-bromo-4-hydroxybenzaldehyde (2.07 g, 10.4 mmol), *tert*-butyl bromoacetate (1.53 mL, 10.4 mmol) and potassium carbonate (2.43 g, 17.6 mmol) in

acetonitrile (30 mL) was stirred for 16 h at 70 °C. The mixture was then cooled to r.t. and diluted with water (150 mL). The aqueous mixture was extracted with ethyl acetate (3 × 70 mL), and the combined organics washed with brine (2 × 200 mL), dried with MgSO<sub>4</sub>, filtered, and concentrated under reduced pressure. The residue was purified via flash column chromatography on silica gel eluting with EtOAc:Petrol (15:85). Fractions containing the product were concentrated under reduced pressure to provide a white solid (3.23 g, 10.3 mmol, 99%). Data were consistent with those previously reported.<sup>3</sup>

**R<sub>f</sub>**: 0.35 (2:8, EtOAc:Petrol, UV active); **<sup>1</sup>H NMR** (400 MHz, CDCl<sub>3</sub>) δ = 10.19 (s, 1H, CHO), 7.87 (d, *J* = 8.6 Hz, 1H, PhH<sub>5</sub>), 7.11 (d, *J* = 2.5 Hz, 1H, PhH<sub>2</sub>), 6.91 (dd, *J* = 8.6, 2.5 Hz, 1H, PhH<sub>4</sub>), 4.57 (s, 2H, CH<sub>2</sub>O), 1.47 (s, 9H, <sup>t</sup>Bu); **<sup>13</sup>C NMR** (101 MHz, CDCl<sub>3</sub>) δ = 190.6 (CHO), 166.8 (COO), 162.8 (PhC<sub>4</sub>), 131.5 (PhC<sub>5</sub>), 128.7 (PhC<sub>1</sub>), 127.7 (PhC<sub>3</sub>), 119.5 (PhC<sub>2</sub>), 114.5 (PhC<sub>6</sub>), 83.3 (CMe<sub>3</sub>), 65.8 (CH<sub>2</sub>O), 28.1 (<sup>t</sup>Bu); **HRMS**: *m/z* (ESI<sup>+</sup>) calc. for C<sub>13</sub>H<sub>15</sub><sup>79</sup>BrO<sub>4</sub> [<sup>79</sup>M+Na]<sup>+</sup>: 337.0053; Obs.: 337.0046; **v<sub>max</sub>**: (FT-ATR)/cm<sup>-1</sup>: 2979, 2863, 1746, 1685, 1590, 1486, 1368, 1310, 1218, 1152, 1071, 1028, 843, 613; **m.p.**: 87-89 °C.

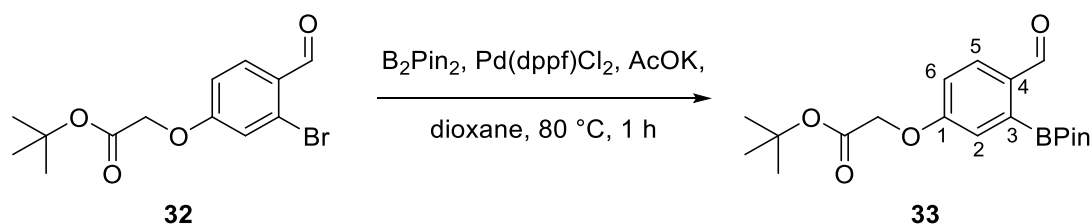

**32** (2.15 g, 6.85 mmol), bis(pinacolato)diboron (4.52 g, 17.8 mmol), 1,1'-[bis(diphenylphosphino)ferrocene]dichloropalladium(II) (500 mg, 0.685 mmol) and potassium acetate (3.62 g, 37.0 mmol) were placed under a nitrogen atmosphere, and anhydrous dioxane (25 mL) was added. Nitrogen was bubbled through the reaction mixture for 10 min, which was then stirred at 80 °C for 1 h. After cooling to r.t., the reaction was concentrated under reduced pressure. The residue was purified via flash column chromatography on silica gel, eluting with EtOAc:Petrol (15:85). Fractions containing the product were concentrated under reduced pressure to yield a white solid (1.87 g, 5.16 mmol, 75%). Data were consistent with those previously reported.<sup>3</sup>

**R<sub>f</sub>**: 0.38 (15:85, EtOAc:Petrol, UV active); **<sup>1</sup>H NMR** (400 MHz, CDCl<sub>3</sub>) δ = 10.39 (s, 1H, CHO), 7.93 (d, *J* = 8.8 Hz, 1H, PhH<sub>5</sub>), 7.26 (d, *J* = 2.5 Hz, 1H, PhH<sub>2</sub>), 7.03 (dd, *J* = 8.8, 2.5 Hz, 1H, PhH<sub>6</sub>), 4.59 (s, 2H, CH<sub>2</sub>O), 1.47 (s, 9H, <sup>t</sup>Bu), 1.36 (s, 12H, C(CH<sub>3</sub>)<sub>2</sub>);

**<sup>13</sup>C NMR** (101 MHz, CDCl<sub>3</sub>) δ = 193.2 (C=O), 167.4 (C=O), 161.5 (PhC1), 135.5 (PhC3), 132.0 (PhC4), 130.4 (PhC5), 120.5 (PhC2), 117.2 (PhC6), 84.6 (OC(CH<sub>3</sub>)<sub>2</sub>), 82.9 (CMe<sub>3</sub>), 65.6 (CH<sub>2</sub>O), 28.1 (tBu), 25.1 (C(CH<sub>3</sub>)<sub>2</sub>); **HRMS**: m/z (ESI<sup>+</sup>) calc. for C<sub>19</sub>H<sub>27</sub>BO<sub>6</sub> [M+H]<sup>+</sup>: 363.1977; Obs.: 363.1977; **v**<sub>max</sub>: (FT-ATR)/cm<sup>-1</sup>: 2979, 2933, 1752, 1686, 1589, 1420, 1340, 1323, 1211, 1147, 1123, 1077, 1052, 964, 849, 734; **m.p.**: 80-83 °C.

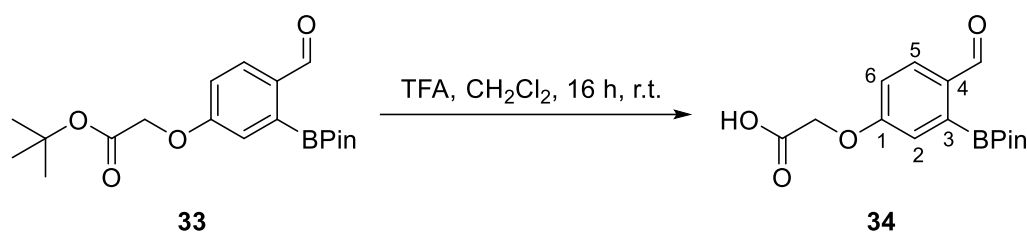

Trifluoroacetic acid (3.0 mL) was added dropwise to a solution of **33** (1.00 g, 2.76 mmol) in dichloromethane (15 mL), and the mixture was stirred at r.t. for 16 h. The reaction mixture was then concentrated under reduced pressure and azeotroped with dichloromethane (4 × 20 mL) to obtain a white powder. (810 mg, 2.65 mmol, 96%). Data were consistent with those previously reported.<sup>3</sup>

**R<sub>f</sub>**: 0.24 (4:6, EtOAc:Petrol, UV active); **<sup>1</sup>H NMR** (400 MHz, DMSO-*d*<sub>6</sub>) δ = 10.10 (s, 1H, CH=O), 7.85 (d, *J* = 8.5 Hz, 1H, PhH<sub>5</sub>), 7.12 (dd, *J* = 8.5, 2.8 Hz, 1H, PhH<sub>6</sub>), 7.09 (d, *J* = 2.8 Hz, 1H, PhH<sub>2</sub>), 4.80 (s, 2H, CH<sub>2</sub>O), 1.30 (s, 12H, C(CH<sub>3</sub>)<sub>2</sub>); **<sup>13</sup>C NMR** (101 MHz, DMSO-*d*<sub>6</sub>) δ = 194.4 (C=O), 168.4 (C=O), 161.4 (PhC1), 135.2 (PhC3), 131.3 (PhC4), 130.8 (PhC5), 121.0 (PhC2), 116.7 (PhC6), 85.0 (OC(CH<sub>3</sub>)<sub>2</sub>), 64.5 (CH<sub>2</sub>O), 25.0 (C(CH<sub>3</sub>)<sub>2</sub>); **HRMS**: m/z (ESI<sup>+</sup>) calc. for C<sub>15</sub>H<sub>18</sub>BO<sub>6</sub> [M+H]<sup>+</sup>: 307.1350; Obs.: 307.1350; **v**<sub>max</sub>: (FT-ATR)/cm<sup>-1</sup>: 2979, 2937, 1763, 1561, 1418, 1371, 1343, 1283, 1203, 1174, 1125, 1072, 960, 850, 691; **m.p.**: 169-172 °C.

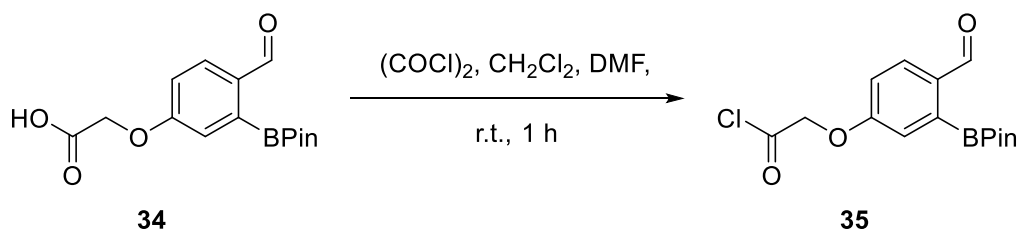

Oxalyl chloride (61 μL, 0.71 mmol) was added to a solution of **34** (72 mg, 0.24 mmol), dichloromethane (3 mL) and dimethylformamide (1 drop), and stirred at r.t. for 1 h. Excess oxalyl chloride and dichloromethane were removed under reduced pressure to

give the crude product as a brown oil, which was carried forward without further purification.

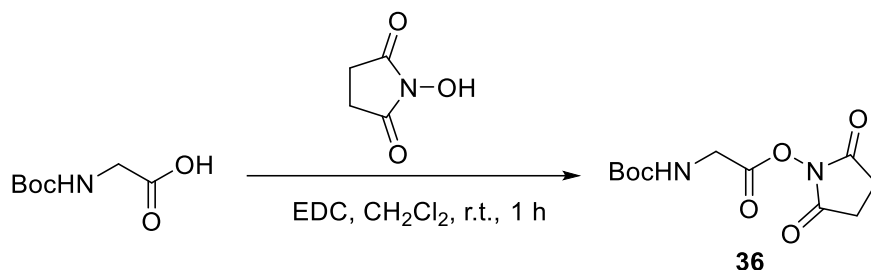

A mixture of *N*-(tert-butoxycarbonyl)glycine (100 mg, 0.571 mmol), *N*-hydroxy succinimide (99 mg, 0.857 mmol), and *N*-(3-dimethylaminopropyl)-*N'*-ethylcarbodiimide hydrochloride (164 mg, 0.86 mmol) in dichloromethane (5 mL) was stirred at r.t. for 1 h. Dichloromethane (30 mL) was then added and the organic layer was washed with water (2 × 20 mL) and brine (2 × 20 mL), dried with MgSO<sub>4</sub>, filtered and concentrated under reduced pressure to give a white solid (165 mg, 0.61 mmol, 75%). Data were consistent with those previously reported.<sup>4</sup>

**R<sub>f</sub>**: 0.27 (2:8, EtOAc:Petrol); **<sup>1</sup>H NMR** (400 MHz, CDCl<sub>3</sub>) δ = 4.97 (app br s, 1H, NH), 4.28 (d, *J* = 5.9 Hz, 2H, CH<sub>2</sub>N), 2.84 (s, 4H, OSu), 1.44 (s, 9H, Boc); **HRMS**: *m/z* (ESI<sup>+</sup>) calc. for C<sub>11</sub>H<sub>16</sub>N<sub>2</sub>O<sub>6</sub> [M+Na]<sup>+</sup>: 295.0901; Obs.: 295.0901; **m.p.**: 156-159 °C.

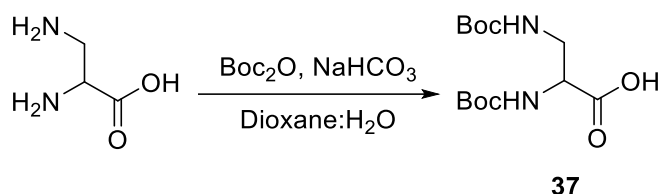

Di-*tert*-butyl dicarbonate (3.05 g, 14 mmol) was added to a solution of 2,3-diaminopropionic acid (500 mg, 3.5 mmol) and sodium bicarbonate (2.94 g, 10 mmol) in a mixture of dioxane (15 mL) and water (15 mL), and the reaction was stirred at r.t. for 18 h. The mixture was then diluted with water (50 mL) and washed with dichloromethane (2 × 15 mL). The aqueous layer was acidified with hydrochloric acid (1 M) to pH ~2, and then extracted with dichloromethane (3 × 30 mL). The combined organic extracts of the acidified aqueous fraction were combined, dried with MgSO<sub>4</sub>, filtered, and concentrated under reduced pressure. The residue was purified via flash column chromatography on silica gel, eluting with MeOH:CH<sub>2</sub>Cl<sub>2</sub> (5:95). Fractions containing the product were concentrated under reduced pressure to yield a colourless oil (210 g, 0.7 mmol, 20%). Data were consistent with those previously reported.<sup>5</sup>

**<sup>1</sup>H NMR** (400 MHz, CDCl<sub>3</sub>) δ = 6.71 (br s, 1H, NH), 5.19 (br s, 1H, NH), 4.22-4.31 (m, 1H, H<sub>α</sub>), 3.46-3.75 (m, 2H, H<sub>β</sub>), 1.43 (s, 18H, 2 × Boc).

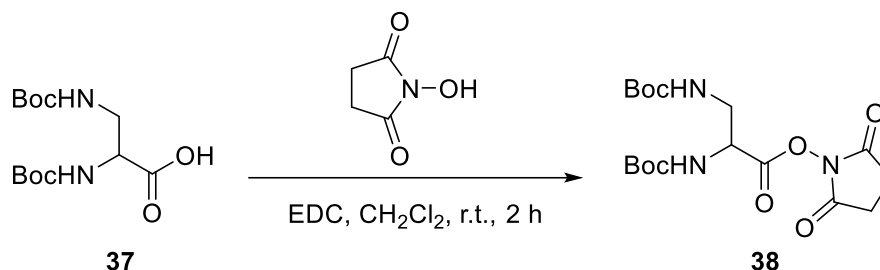

A mixture of **37** (29 mg, 95 μmol), *N*-hydroxysuccinimide (16 mg, 0.143 mmol), and *N*-(3-dimethylaminopropyl)-*N*'-ethylcarbodiimide hydrochloride (28 mg, 0.143 mmol) in dichloromethane (1.0 mL) was stirred at r.t. for 2 h. Dichloromethane (10 mL) was then added and the organics were washed with water (2 × 15 mL) and brine (15 mL), dried with MgSO<sub>4</sub>, filtered, and concentrated under reduced pressure to give a pink foam (28 mg, 70 μmol, 74%). The product was used immediately without any further purification or analysis.

**R<sub>f</sub>**: 0.28 (1:9, EtOAc:Petrol); **HRMS**: *m/z* (ESI<sup>+</sup>) calc. for C<sub>17</sub>H<sub>27</sub>N<sub>3</sub>O<sub>8</sub> [M+H]<sup>+</sup>: 402.1871; Obs.: 402.1874; **<sup>1</sup>H NMR** (400 MHz, CDCl<sub>3</sub>) δ = 2.82 (m, 4H, NHS-CH<sub>2</sub>), 1.42 (s, 18H, 2 × Boc).

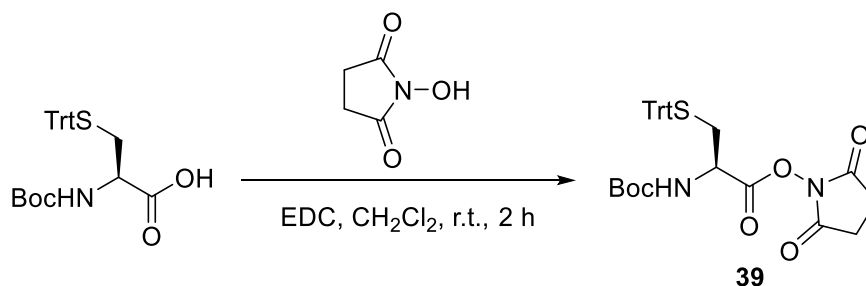

A mixture of Boc-Cys-(Trt)-OH (1.00 g, 2.16 mmol), *N*-hydroxysuccinimide (372 mg, 3.23 mmol), and *N*-(3-dimethylaminopropyl)-*N*'-ethylcarbodiimide hydrochloride (620 mg, 3.23 mmol) in dichloromethane (20 mL) was stirred at r.t. for 2 h. Dichloromethane (30 mL) was then added and the organics were washed with water (2 × 50 mL) and brine (50 mL), dried with MgSO<sub>4</sub>, filtered, and concentrated under reduced pressure to give a white foam. (1.16 g, 0.207 mmol, quantitative yield).

**R<sub>f</sub>**: 0.24 (2:8, EtOAc:Petrol, UV active); **<sup>1</sup>H NMR** (400 MHz, CDCl<sub>3</sub>) δ = 7.43 (dd, *J* = 7.5, 1.7 Hz, 6H, PhH<sub>2</sub>), 7.29 (t, *J* = 7.5 Hz, 6H, PhH<sub>3</sub>), 7.24-7.18 (t, *J* = 7.5, 1.7 Hz,

3H, PhH<sub>4</sub>), 4.86 (d,  $J = 8.3$  Hz, 1H, CHNH<sub>2</sub>Boc), 2.79 (s, 4H, OSu), 2.81-2.76 (m, 1H, CH<sub>2</sub>STrt), 2.71-2.66 (m, 1H, CH<sub>2</sub>STrt), 1.42 (s, 9H, Boc); **HRMS**:  $m/z$  (ESI<sup>+</sup>) calc. for C<sub>29</sub>H<sub>30</sub>N<sub>2</sub>O<sub>6</sub>S [M+H]<sup>+</sup>: 536.1658; Obs.: 536.1658;  $\nu_{\text{max}}$ : (FT-ATR)/cm<sup>-1</sup>: 3426, 2978, 1707, 1491, 1444, 1393, 1368, 1217, 1162, 1052, 852, 744, 700, 675, 620, 505; **m.p.**: 71-74 °C.

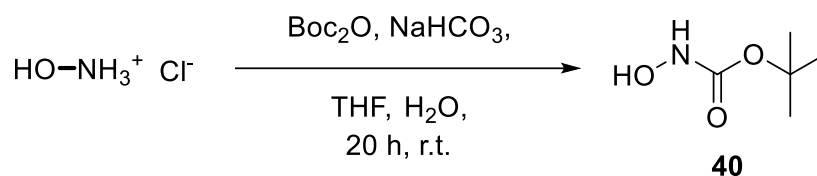

A solution of sodium hydrogen carbonate (2.44 g, 29.0 mmol) in water (30 mL) was added dropwise to a mixture of hydroxylamine hydrochloride (1.00 g, 14.5 mmol) and di-*tert*-butyl dicarbonate (3.16 g, 14.5 mmol) in tetrahydrofuran (20 mL), and the reaction stirred at r.t. for 20 h. Water (150 mL) was then added, and the aqueous was extracted with ethyl acetate (2 × 150 mL). The combined organics were washed with water (30 mL) and brine (2 × 30 mL), dried with MgSO<sub>4</sub>, filtered, and concentrated to afford a colourless oil (1.71 g, 12.9 mmol, 89%). Data were consistent with those previously reported.<sup>6,7</sup>

**R<sub>f</sub>**: 0.30 (1:9, EtOAc:Petrol); **<sup>1</sup>H NMR** (400 MHz, CDCl<sub>3</sub>)  $\delta$  = 7.02 (s, 1H, NH), 1.46 (s, 9H, Boc); **<sup>13</sup>C NMR** (101 MHz, CDCl<sub>3</sub>)  $\delta$  = 158.8 (C=O), 82.3 (CMe<sub>3</sub>), 28.3 (Boc); **HRMS**:  $m/z$  (ESI<sup>+</sup>) calc. for C<sub>5</sub>H<sub>10</sub>NO<sub>3</sub> [M+Na]<sup>+</sup>: 156.0633; Obs.: 156.0633.

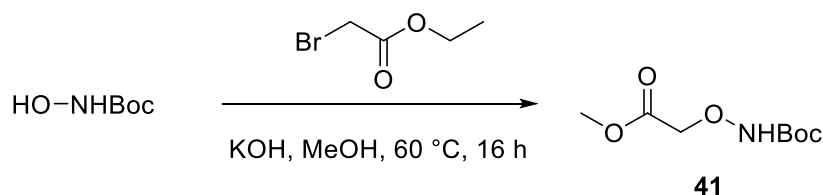

A mixture of ethyl bromoacetate (1.40 mL, 12.6 mmol), **UK/NR/037** (1.68 g, 12.6 mmol), and potassium hydroxide (0.71 g, 12.6 mmol) in methanol (15 mL) was stirred at 60 °C for 16 h. The reaction mixture was then concentrated under reduced pressure. Water (30 mL) was added to residue and the aqueous was extracted with dichloromethane (4 × 30 mL). The combined organics were washed with brine (50 mL), dried with MgSO<sub>4</sub>, filtered, and concentrated under reduced pressure. The residue was purified via flash column chromatography on silica gel, eluting with EtOAc:petrol (2:8). Pure fractions were concentrated under reduced pressure to provide a yellow solid (1.36 g, 6.63 mmol, 53%). Data were consistent with those previously reported.<sup>8</sup>

**R<sub>f</sub>**: 0.33 (2:8, EtOAc:Petrol); **<sup>1</sup>H NMR** (400 MHz, CDCl<sub>3</sub>) δ = 7.75 (s, 1H, NH), 4.43 (s, 2H, CH<sub>2</sub>O), 3.77 (s, 3H, OCH<sub>3</sub>), 1.48 (s, 9H, Boc); **<sup>13</sup>C NMR** (101 MHz, CDCl<sub>3</sub>) δ = 170.2 (C=O), 156.3 (C=OONH), 82.3 (CMe<sub>3</sub>), 72.6 (C=ONH), 52.2 (CH<sub>3</sub>O), 28.2 (Boc); **HRMS**: m/z (ESI<sup>+</sup>) calc. for C<sub>8</sub>H<sub>14</sub>NO<sub>5</sub> [M+Na]<sup>+</sup>: 228.0842; Obs.: 228.0841; **ν<sub>max</sub>**: (FT-ATR)/cm<sup>-1</sup>: 3305, 2979, 1737, 1439, 1368, 1216, 1165, 1117, 995, 848, 776, 713, 589; **m.p.**: 55-57 °C.

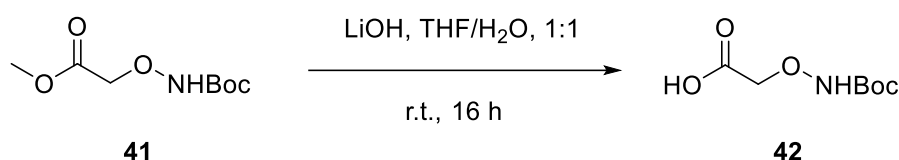

Lithium hydroxide (0.40 g, 16.6 mmol) was added to a solution of **41** (1.36 g, 6.63 mmol) in a mixture of tetrahydrofuran (5 mL) and water (5 mL), and the reaction was stirred at r.t. for 16 h. The tetrahydrofuran was then removed under reduced pressure and hydrochloric acid (1 M, 30 mL) was added. The aqueous was extracted with ethyl acetate (3 × 50 mL) and the combined organics dried with MgSO<sub>4</sub>, filtered, and concentrated under reduced pressure to afford a cream-white solid (972 mg, 5.09 mmol, 77%).

**R<sub>f</sub>**: 0.22 (1:1, EtOAc:Petrol); **<sup>1</sup>H NMR** (400 MHz, CDCl<sub>3</sub>) δ = 11.02 (s, 1H, OH), 8.21 (s, 1H, NH), 4.46 (s, 2H, CH<sub>2</sub>O), 1.47 (s, 9H, Boc); **HRMS**: m/z (ESI<sup>+</sup>) calc. for C<sub>7</sub>H<sub>11</sub>NO<sub>5</sub> [M+H]<sup>+</sup>: 190.0721; Obs.: 190.0716; **ν<sub>max</sub>**: (FT-ATR)/cm<sup>-1</sup>: 3266, 2981, 2936, 1721, 1479, 1395, 1370, 1251, 1163, 1122, 1054, 979, 847, 777, 675; **m.p.**: 102-105 °C.

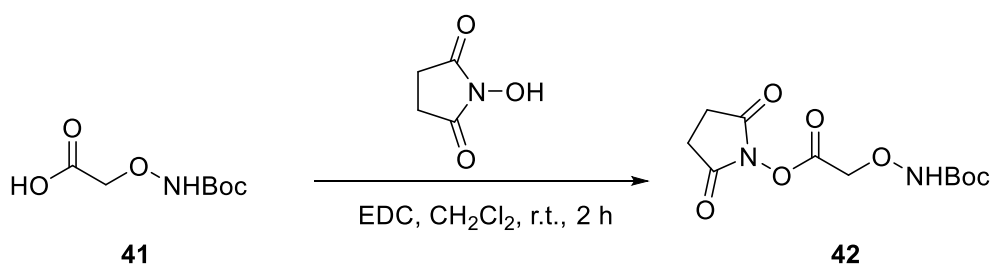

A mixture of **41** (920 mg, 4.82 mmol), *N*-hydroxysuccinimide (831 mg, 7.23 mmol), and *N*-(3-dimethylaminopropyl)-*N'*-ethylcarbodiimide hydrochloride (1.39 g, 7.23 mmol) in dichloromethane (20 mL) was stirred at r.t. for 2 h. Dichloromethane (30 mL) was then added and the organics were washed with water (2 × 30 mL) and brine (30 mL), dried with MgSO<sub>4</sub>, filtered, and concentrated under reduced pressure to give a colourless oil (1.12 g, 3.89 mmol, 81%).

**R<sub>f</sub>**: 0.35 (2:8, EtOAc:Petrol); **<sup>1</sup>H NMR** (400 MHz, CDCl<sub>3</sub>) δ = 7.99 (s, 1H, NH), 4.71 (s, 2H, CH<sub>2</sub>O), 2.81 (s, 4H, CH<sub>2</sub>CO), 1.41 (s, 9H, Boc); **HRMS**: m/z (ESI<sup>+</sup>) calc. for C<sub>11</sub>H<sub>15</sub>N<sub>2</sub>O<sub>7</sub> [M+Na]<sup>+</sup>: 311.0850; Obs.: 311.0840; **ν<sub>max</sub>**: (FT-ATR)/cm<sup>-1</sup>: 3230, 2981, 1702, 1395, 1370, 1215, 1162, 1120, 1080, 997, 815, 86, 716, 655; **m.p.**: 110-114 °C.

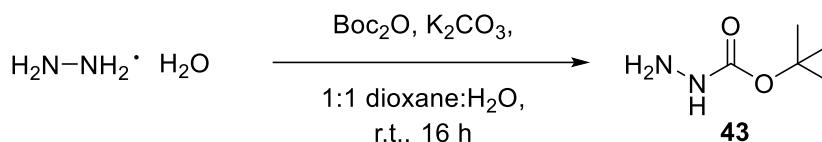

A solution of di-*tert*-butyl dicarbonate (3.52 g, 16.2 mmol) in dioxane (30 mL) was added dropwise to a stirred solution of hydrazine monohydrate (3.20 mL, 66.4 mmol) and potassium carbonate (9.28 g, 66.4 mmol) in water (30 mL), and the mixture stirred at r.t for 16 h. The reaction mixture was then extracted with diethyl ether (3 × 50 mL), and the combined organics dried with MgSO<sub>4</sub>, filtered, and concentrated under reduced pressure to give a white solid (2.08 g, 15.8 mmol, 97%).

**R<sub>f</sub>**: 0.18 (8:2, EtOAc:Petrol); **<sup>1</sup>H NMR** (400 MHz, CDCl<sub>3</sub>) δ = 3.79 (s, 1H, NH), 1.44 (s, 9H, Boc); **<sup>13</sup>C NMR** (101 MHz, CDCl<sub>3</sub>) δ = 135.9 (C=NH), 80.6 (CMe<sub>3</sub>), 28.4 (Boc); **HRMS**: m/z (ESI<sup>+</sup>) calc. for C<sub>5</sub>H<sub>12</sub>N<sub>2</sub>O<sub>2</sub> [M+Na]<sup>+</sup>: 155.0791; Obs.: 155.0792; **ν<sub>max</sub>**: (FT-ATR)/cm<sup>-1</sup>: 3333, 2978, 2933, 1701, 1489, 1366, 1287, 1161, 1061, 870, 768; **m.p.**: 40-43 °C.

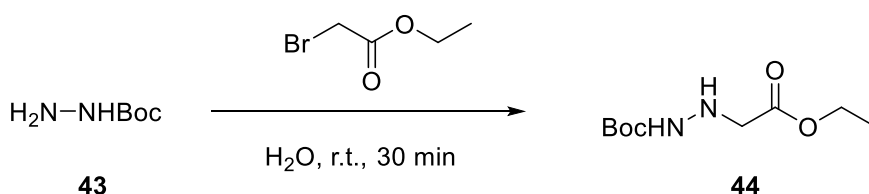

Ethyl bromoacetate (840 μL, 7.58 mmol) was added to a stirred solution of **43** (1.50 g, 11.3 mmol) in water (15 mL) and stirred at r.t. for 1 h. The reaction mixture was then extracted with diethyl ether (3 × 40 mL), and the combined organics were washed with brine (2 × 50 mL), dried with MgSO<sub>4</sub>, filtered, and concentrated under reduced pressure. The residue was purified via flash column chromatography on silica gel, eluting with EtOAc:Petrol (4:6). Fractions containing the product were concentrated under reduced pressure to provide a colourless oil (1.12 g, 5.14 mmol, 68%).

**R<sub>f</sub>**: 0.27 (4:6, EtOAc:Petrol); **<sup>1</sup>H NMR** (400 MHz, CDCl<sub>3</sub>) δ = 6.47 (s, 1H, NH), 4.23-4.13 (m, 2H, CH<sub>2</sub>CH<sub>3</sub>), 3.66-3.59 (m, 2H, CH<sub>2</sub>O), 1.42 (s, 9H, Boc), 1.25 (t, *J* = 7.1 Hz,

CCOC(=O)CNc1ccc(C(F)(F)F)cc1
 $\xrightarrow[40\text{ }^{\circ}\text{C, 1 h}]{\text{LiOH, dioxane/water, 2:1}}$ 
OC(=O)CNc1ccc(C(F)(F)F)cc1

**44** **45**

**Rf:** 0.11 (9:1, EtOAc:Petrol); **<sup>1</sup>H NMR** (400 MHz, CD<sub>3</sub>OD) δ = 3.34-3.23 (m, 2H, CH<sub>2</sub>O), 1.42 (s, 9H, Boc); **<sup>13</sup>C NMR** (101 MHz, CD<sub>3</sub>OD) δ = 172.9 (C=OCH<sub>2</sub>), 135.9 (CONH), 83.3 (CMe<sub>3</sub>), 51.9 (CH<sub>2</sub>), 27.3 (Boc); **HRMS:** m/z (ESI<sup>+</sup>) calc. for C<sub>7</sub>H<sub>14</sub>N<sub>2</sub>O<sub>4</sub> [M+Na]<sup>+</sup>: 213.0846; Obs.: 213.0846; **ν<sub>max</sub>:** (FT-ATR)/cm<sup>-1</sup>: 3252, 2978, 2964, 1701, 1536, 1368, 1247, 1148, 1058, 803, 736. **m.p:** 143-145 °C.

Chemical reaction scheme showing the synthesis of compound **46** from compound **1** and compound **35**.

Reaction conditions: DMAP,  $K_2CO_3$ , DMF, r.t., 3 h.

Structure **1** is a 3,3,4,4-tetramethyl-1,3-dihydro-2H-indole-2-ylidene derivative with a 3-sulfonatopropyl group on the nitrogen and a 3-aminopropyl group on the indole nitrogen.

Structure **35** is 4-(benzylideneoxy)benzoic acid chloride.

The product, compound **46**, is a complex molecule where the two indole systems are linked via a trans-vinyl bridge. The left indole system (labeled **1**) has a 3-sulfonatopropyl group. The right indole system (labeled **46**) has a 3-((benzylideneoxy)carbamoyl)propyl group. The product is shown with atom numbering: 1-9 for the left indole system and 1'-9' for the right indole system.

4-Dimethylaminopyridine (75 mg, 0.62 mmol) was added to a mixture of **1** (104 mg, 0.21 mmol), **35** (77 mg, 0.24 mmol), and potassium carbonate (85 mg, 0.62 mmol) in anhydrous dichloromethane (5 mL) and stirred at r.t. for 2 h. The reaction mixture was then precipitated in diethyl ether (400 mL). The solid was then collected by filtration, washed with diethyl ether (30 mL), and dried in air to give a pink powder. The residue was purified via flash column chromatography on silica gel eluting with MeOH:CH<sub>2</sub>Cl<sub>2</sub> (5:95). Fractions containing the product were concentrated under reduced pressure to provide a pink oil, which was redissolved in dichloromethane (30 mL). The organics were washed with hydrochloric acid (0.1 M, 2 × 10 mL), dried with MgSO<sub>4</sub>, filtered, and concentrated under reduced pressure, to give a pink oil (30 mg, 38 μmol, 18%).

**R<sub>f</sub>**: 0.16 (5:95, MeOH:CH<sub>2</sub>Cl<sub>2</sub>, visible light active); **<sup>1</sup>H NMR** (400 MHz, CD<sub>3</sub>OD, NMR data is provided for the acetal) δ = 8.48 (dd, *J*<sub>1</sub> = *J*<sub>2</sub> = 13.4 Hz, 1H, CHCHCN), 7.53-7.48 (m, 2H, H<sub>5</sub>, H<sub>5'</sub>), 7.43-7.36 (m, 3H, H<sub>7</sub>, H<sub>7'</sub>, H<sub>8</sub>/H<sub>8'</sub>), 7.35-7.22 (m, 4H, PhH<sub>5</sub>, H<sub>6</sub>, H<sub>6'</sub>, H<sub>8</sub>/H<sub>8'</sub>), 7.00 (dd, *J* = 8.1, 2.6 Hz, 1H, PhH<sub>6</sub>), 6.85 (d, *J* = 2.6 Hz, 1H, PhH<sub>2</sub>), 6.66 (dd, *J* = 13.4, 5.2 Hz, 1H, CHCN), 6.41 (dd, *J* = 13.4, 5.2 Hz, 1H, CHCN), 5.47 (s, 1H, CH(OR)<sub>2</sub>), 4.52 (s, 2H, CH<sub>2</sub>O), 4.26 (t, *J* = 7.6 Hz, 2H, CH<sub>2</sub>CH<sub>2</sub>CH<sub>2</sub>SO<sub>3</sub>), 4.12 (t, *J* = 7.6 Hz, 2H, CH<sub>2</sub>CH<sub>2</sub>CH<sub>2</sub>NH), 3.45 (t, *J* = 7.6 Hz, 2H, CH<sub>2</sub>NH), 2.97 (t, *J* = 7.6 Hz, 2H, CH<sub>2</sub>SO<sub>3</sub>), 2.25-2.20 (m, 2H, CH<sub>2</sub>CH<sub>2</sub>SO<sub>3</sub>), 2.11-2.01 (m, 2H, CH<sub>2</sub>CH<sub>2</sub>NH), 1.72 (s, 12H, CyCH<sub>3</sub>), 1.21 (s, 12H, C(CH<sub>3</sub>)<sub>2</sub>); **<sup>13</sup>C NMR** (101 MHz, CD<sub>3</sub>OD, NMR data is provided for the acetal) δ = 174.7 (CHCHCN), 174.6 (C<sub>2</sub>, C<sub>2'</sub>), 170.2 (CONH), 157.4 (PhC<sub>1</sub>), 150.9 (C<sub>3</sub>, C<sub>3'</sub>), 141.9 (C<sub>9</sub>, C<sub>9'</sub>), 140.8 (C<sub>4</sub>, C<sub>4'</sub>), 134.1 (PhC<sub>4</sub>), 130.7 (PhC<sub>5</sub>), 128.8 (C<sub>7</sub>/C<sub>7'</sub>), 128.7 (C<sub>7</sub>/C<sub>7'</sub>), 125.5 (C<sub>6</sub>, C<sub>6'</sub>), 125.4 (PhC<sub>3</sub>), 122.2 (C<sub>5</sub>, C<sub>5'</sub>), 115.9 (PhC<sub>2</sub>), 114.4 (PhC<sub>6</sub>), 111.2 (C<sub>8</sub>/C<sub>8'</sub>), 111.0 (C<sub>8</sub>/C<sub>8'</sub>), 102.9 (CHCN), 102.8 (CHCN), 74.5 ((CH<sub>3</sub>)<sub>2</sub>O), 66.9 (CH<sub>2</sub>CO), 49.3 (CH<sub>2</sub>SO<sub>3</sub>), 42.6 (CH<sub>2</sub>CH<sub>2</sub>CH<sub>2</sub>SO<sub>3</sub>), 41.6 (CH<sub>2</sub>CH<sub>2</sub>CH<sub>2</sub>NH), 36.1 (CH<sub>2</sub>NH), 27.0 (CyCH<sub>3</sub>), 23.9 (CH<sub>2</sub>CH<sub>2</sub>NH<sub>2</sub>), 23.7 (C(CH<sub>3</sub>)<sub>2</sub>), 22.9 (CH<sub>2</sub>CH<sub>2</sub>SO<sub>3</sub>); **HRMS**: *m/z* (ESI<sup>+</sup>) calc. for C<sub>44</sub>H<sub>54</sub>BN<sub>3</sub>O<sub>8</sub>S [M+Na]<sup>+</sup>: 818.3636; Obs.: 818.3636; **ν<sub>max</sub>**: (FT-ATR)/cm<sup>-1</sup>: 3415, 3076, 2915, 1645, 1556, 1454, 1427, 1217, 1149, 1113, 1036, 926, 795, 756, 731, 680, 527.

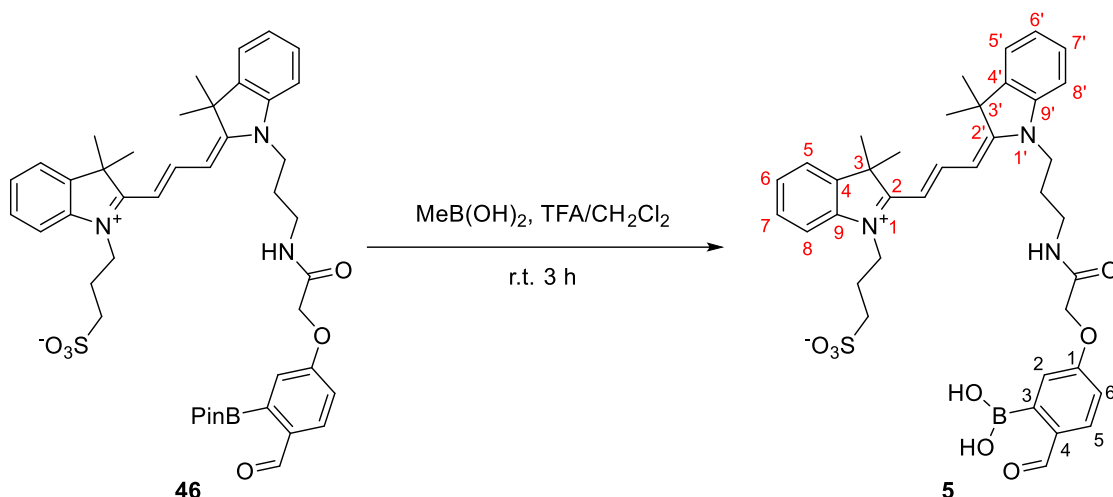

Trifluoroacetic acid (0.5 mL) was added to a solution of **46** (30 mg, 38  $\mu$ mol) and methylboronic acid (23 mg, 377  $\mu$ mol) in dichloromethane (5 mL), and the mixture stirred at r.t for 3 h. The reaction was azeotroped with dichloromethane (3  $\times$  20 mL), and hydrochloric acid (0.1 M, 2  $\times$  10 mL) was added, and concentrated under reduced pressure. The residue was then suspended in water (10 mL) and lyophilised to yield a pink solid. (26 mg, 38  $\mu$ mol, quantitative yield).

**R<sub>f</sub>**: 0.12 (5:95, MeOH:CH<sub>2</sub>Cl<sub>2</sub>, visible light active); **<sup>1</sup>H NMR** (400 MHz, CD<sub>3</sub>OD, NMR data is provided for the acetal)  $\delta$  = 8.53 (dd,  $J_1 = J_2 = 13.4$  Hz, 1H, CHCHCN), 7.55 (dd,  $J = 7.4, 2.8$  Hz, 2H, H<sub>5</sub>, H<sub>5'</sub>), 7.47-7.39 (m, 3H, H<sub>7</sub>, H<sub>7'</sub>, H<sub>8</sub>/H<sub>8'</sub>), 7.37-7.27 (m, 4H, PhH<sub>5</sub>, H<sub>6</sub>, H<sub>6'</sub>, H<sub>8</sub>/H<sub>8'</sub>), 7.04 (dd,  $J = 8.1, 2.7$  Hz, 1H, PhH<sub>6</sub>), 6.90 (d,  $J = 2.7$  Hz, 1H, PhH<sub>2</sub>), 6.62 (d,  $J = 13.4$  Hz, 1H, CHCN), 6.46 (d,  $J = 13.4$  Hz, 1H, CHCN), 5.41 (s, 1H, CH(OR)<sub>2</sub>), 4.57 (s, 2H, CH<sub>2</sub>O), 4.39-4.27 (m, 2H, CH<sub>2</sub>CH<sub>2</sub>CH<sub>2</sub>SO<sub>3</sub>), 4.16 (t,  $J = 7.2$  Hz, 2H, CH<sub>2</sub>CH<sub>2</sub>CH<sub>2</sub>NH), 3.49 (t,  $J = 7.2$  Hz, 2H, CH<sub>2</sub>NH), 3.02 (t,  $J = 6.9$  Hz, 2H, CH<sub>2</sub>SO<sub>3</sub>), 2.29-2.25 (m, 2H, CH<sub>2</sub>CH<sub>2</sub>SO<sub>3</sub>), 2.10 (tt,  $J_1 = J_2 = 7.2$  Hz, 2H, CH<sub>2</sub>CH<sub>2</sub>NH), 1.77 (s, 12H, CyCH<sub>3</sub>); **<sup>13</sup>C NMR** (101 MHz, CD<sub>3</sub>OD, NMR data is provided for the acetal)  $\delta$  = 174.7 (CHCHCN), 174.5 (C<sub>2</sub>, C<sub>2'</sub>), 170.2 (CONH), 157.4 (PhC<sub>1</sub>), 150.8 (C<sub>3</sub>, C<sub>3'</sub>), 141.8 (C<sub>9</sub>, C<sub>9'</sub>), 140.8 (C<sub>4</sub>, C<sub>4'</sub>), 134.1 (PhC<sub>4</sub>), 130.7 (PhC<sub>5</sub>), 128.7 (C<sub>7</sub>, C<sub>7'</sub>), 125.4 (C<sub>6</sub>, C<sub>6'</sub>), 125.3 (PhC<sub>3</sub>), 122.1 (C<sub>5</sub>, C<sub>5'</sub>), 115.9 (PhC<sub>2</sub>), 114.4 (PhC<sub>6</sub>), 111.2 (C<sub>8</sub>/C<sub>8'</sub>), 111.0 (C<sub>8</sub>/C<sub>8'</sub>), 102.9 (CHCN<sup>+</sup>), 102.7 (CHCN), 66.9 ((CH<sub>3</sub>)<sub>2</sub>O), 49.2 (CH<sub>2</sub>CO), 46.8 (CH<sub>2</sub>SO<sub>3</sub>), 42.6 (CH<sub>2</sub>CH<sub>2</sub>CH<sub>2</sub>SO<sub>3</sub>), 41.5 (CH<sub>2</sub>CH<sub>2</sub>CH<sub>2</sub>NH), 36.1 (CH<sub>2</sub>NH), 26.9 (CyCH<sub>3</sub>), 26.6 (CH<sub>2</sub>CH<sub>2</sub>NH<sub>2</sub>), 22.8 (CH<sub>2</sub>CH<sub>2</sub>SO<sub>3</sub>); **HRMS**:  $m/z$  (ESI<sup>+</sup>) calc. for C<sub>38</sub>H<sub>44</sub>BN<sub>3</sub>O<sub>8</sub>S [M+Na]<sup>+</sup>: 736.2834; Obs.: 736.2834;  $\nu_{\text{max}}$ : (FT-ATR)/cm<sup>-1</sup>:

3289, 2926, 1676, 1558, 1456, 1429, 1373, 1232, 1151, 1115, 1037, 927, 756, 681;  
**m.p:** 315-320 °C;

Evidence for the formation of **5** was further provided by incubating 5 mg with 1.5 equiv. of *n*-butylamine in MeOD for 30 min. After this time, exclusive formation of boronoimine **47** was observed.

**<sup>1</sup>H NMR** (400 MHz, CD<sub>3</sub>OD, NMR data is provided for the acetal)  $\delta$  = 8.62 (s, 1H, -CHNCH<sub>2</sub>), 8.57 (dd,  $J_1 = J_2$  = 13.4 Hz, 1H, CHCHCN), 7.63 (d,  $J$  = 8.3 Hz, 1H, PhH<sub>5</sub>), 7.58-7.54 (m, 2H, H<sub>5</sub>, H<sub>5'</sub>), 7.48-7.41 (m, 3H, H<sub>7</sub>, H<sub>7'</sub>, H<sub>8</sub>/H<sub>8'</sub>), 7.35-7.30 (m, 3H, PhH<sub>5</sub>, H<sub>6</sub>, H<sub>6'</sub>, H<sub>8</sub>/H<sub>8'</sub>), 7.15 (d,  $J$  = 2.4 Hz, 1H, PhH<sub>2</sub>), 6.99 (dd,  $J$  = 8.3, 2.4 Hz, 1H, PhH<sub>6</sub>), 6.63 (d,  $J$  = 13.4 Hz, 1H, CHCN), 6.50 (d,  $J$  = 13.4 Hz, 1H, CHCN), 4.64 (s, 2H, CH<sub>2</sub>O), 4.39-4.33 (m, 2H, CH<sub>2</sub>CH<sub>2</sub>CH<sub>2</sub>SO<sub>3</sub>), 4.22 (t,  $J$  = 7.5 Hz, 2H, CH<sub>2</sub>CH<sub>2</sub>CH<sub>2</sub>NH), 3.57 (t,  $J$  = 7.7 Hz, 2H, CH<sub>2</sub>NH), 3.48 (t,  $J$  = 7.0 Hz, 2H, -CHNCH<sub>2</sub>), 3.00 (t,  $J$  = 6.7 Hz, 2H, CH<sub>2</sub>SO<sub>3</sub>), 2.29-2.23 (m, 2H, CH<sub>2</sub>CH<sub>2</sub>SO<sub>3</sub>), 2.15-2.10 (m, 2H, CH<sub>2</sub>CH<sub>2</sub>NH), 1.79 (s, 12H, CyCH<sub>3</sub>), 1.52-1.38 (m, 2H, -CHNCH<sub>2</sub>CH<sub>2</sub>CH<sub>2</sub>), 1.01 (t, 3H, -CH<sub>3</sub>).

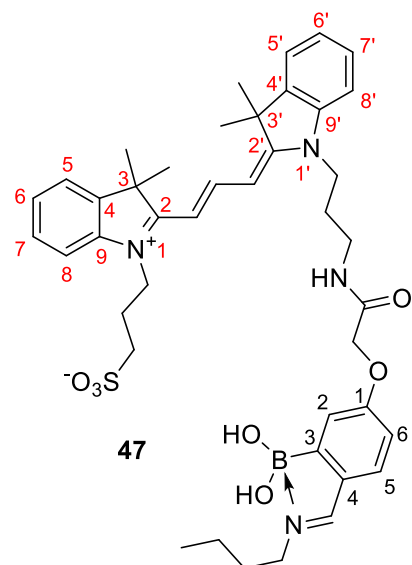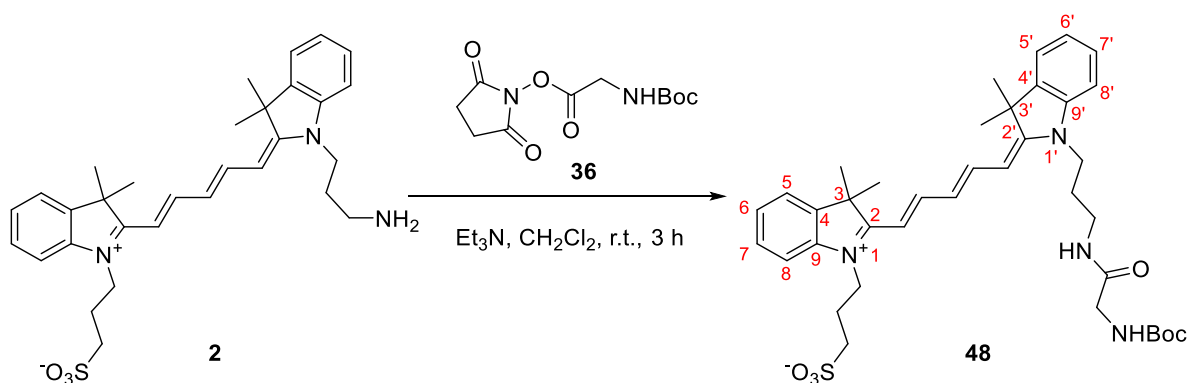

A mixture of **2** (30 mg, 56  $\mu$ mol), **36** (31 mg, 0.112 mmol), and triethylamine (39  $\mu$ L, 0.280 mmol) in dichloromethane (3 mL) was stirred at r.t. for 3 h. The reaction was then concentrated under reduced pressure and the residue was purified via flash column chromatography on silica gel, eluting with MeOH:CH<sub>2</sub>Cl<sub>2</sub> (5:95). Fractions containing the product were concentrated under reduced pressure to provide a blue oil (30 mg, 44  $\mu$ mol, 77%).

**R<sub>f</sub>**: 0.38 (5:95, MeOH:CH<sub>2</sub>Cl<sub>2</sub>, visible light active); **<sup>1</sup>H NMR** (400 MHz, CD<sub>3</sub>OD) δ = 8.20 (dd, *J*<sub>1</sub> = *J*<sub>2</sub> = 13.5 Hz, 2H, CHCHCN), 7.43 (dd, *J* = 7.9, 2.6 Hz, 2H, H<sub>5</sub>, H<sub>5'</sub>), 7.37-7.30 (m, 3H, H<sub>7</sub>, H<sub>7'</sub>, H<sub>8</sub>/H<sub>8'</sub>), 7.30-7.27 (m, 1H, H<sub>8</sub>/H<sub>8'</sub>), 7.19 (dd, *J* = 7.9, 2.8 Hz, 2H, H<sub>6</sub>, H<sub>6'</sub>), 6.67 (dd, *J*<sub>1</sub> = *J*<sub>2</sub> = 13.5 Hz, 1H, CHCHCHCN), 6.38 (d, *J* = 13.5 Hz, 1H, CHCN), 6.27 (d, *J* = 13.5 Hz, 1H, CHCN), 4.34-4.26 (m, 2H, CH<sub>2</sub>CH<sub>2</sub>CH<sub>2</sub>SO<sub>3</sub>), 4.08 (t, *J* = 7.6 Hz, 2H, CH<sub>2</sub>CH<sub>2</sub>CH<sub>2</sub>NH), 3.70 (s, 2H, CH<sub>2</sub>NHBoc), 3.36 (t, *J* = 7.6 Hz, 2H, CH<sub>2</sub>NH), 2.97 (t, *J* = 7.5 Hz, 2H, CH<sub>2</sub>SO<sub>3</sub>), 2.22 (tt, *J*<sub>1</sub> = *J*<sub>2</sub> = 7.5 Hz, 2H, CH<sub>2</sub>CH<sub>2</sub>SO<sub>3</sub>), 1.95 (tt, *J*<sub>1</sub> = *J*<sub>2</sub> = 7.6 Hz, 2H, CH<sub>2</sub>CH<sub>2</sub>NH), 1.65 (s, 12H, CyCH<sub>3</sub>), 1.42 (s, 9H, Boc); **<sup>13</sup>C NMR** (101 MHz, CD<sub>3</sub>OD) δ = 173.1 (C<sub>2</sub>, C<sub>2'</sub>), 171.8 (C<sub>3</sub>, C<sub>3'</sub>), 169.9 (CON), 157.2 (CHCHCN), 154.4 (CHCHCN), 142.2 (C<sub>9</sub>/C<sub>9'</sub>), 142.0 (C<sub>9</sub>/C<sub>9'</sub>), 141.3 (C<sub>4</sub>/C<sub>4'</sub>), 141.2 (C<sub>4</sub>/C<sub>4'</sub>), 130.1 (C<sub>7</sub>, C<sub>7'</sub>), 129.9 (C<sub>7</sub>, C<sub>7'</sub>), 126.0 (CHCHCHCN), 124.9 (C<sub>6</sub>/C<sub>6'</sub>), 124.8 (C<sub>6</sub>/C<sub>6'</sub>), 122.1 (C<sub>5</sub>, C<sub>5'</sub>), 110.8 (C<sub>8</sub>/C<sub>8'</sub>), 110.7 (C<sub>8</sub>/C<sub>8'</sub>), 103.3 (CHCN), 103.1 (CHCN), 79.4 (CH<sub>2</sub>NHBoc), 79.1, (CMe<sub>3</sub>), 49.2 (CH<sub>2</sub>SO<sub>3</sub>), 42.4 (CH<sub>2</sub>CH<sub>2</sub>CH<sub>2</sub>SO<sub>3</sub>), 41.5 (CH<sub>2</sub>CH<sub>2</sub>CH<sub>2</sub>NH), 36.4 (CH<sub>2</sub>NH), 27.4 (Boc), 26.9 (CH<sub>2</sub>CH<sub>2</sub>NH), 26.6 (CyCH<sub>3</sub>), 22.8 (CH<sub>2</sub>CH<sub>2</sub>SO<sub>3</sub>); **HRMS**: *m/z* (ESI<sup>+</sup>) calc. for C<sub>38</sub>H<sub>50</sub>N<sub>4</sub>O<sub>6</sub> [M+Na]<sup>+</sup>: 713.3343; Obs.: 713.3351; **v<sub>max</sub>**: (FT-ATR)/cm<sup>-1</sup>: 3300, 2968, 2924, 2852, 1702, 1659, 1492, 1482, 1453, 1378, 1338, 1216, 1138, 1102, 1035, 925, 709, 522.

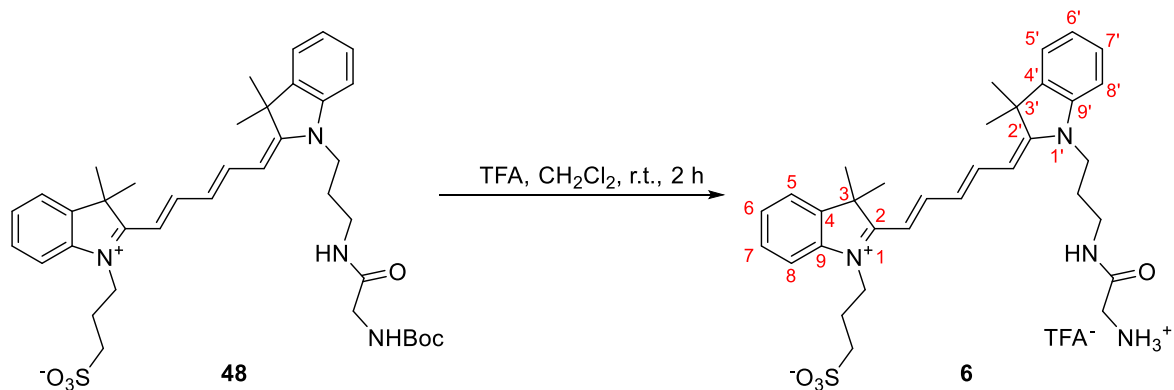

Trifluoroacetic acid (1.0 mL) was added to a solution of **48** (30 mg, 44 μmol) in dichloromethane (5 mL) and stirred at r.t. for 2 h. The reaction mixture was then concentrated under reduced pressure to ~5 mL, and the remaining solution added dropwise to diethyl ether (200 mL). The resultant precipitate was collected by filtration, washed with diethyl ether (30 mL), and dried in air. The solid was then dissolved in methanol (30 mL) and concentrated under reduced pressure to give a blue oil (19 mg, 32 μmol, 73%).

**R<sub>f</sub>**: 0.21 (5:95, CH<sub>2</sub>Cl<sub>2</sub>:MeOH, visible light active); **<sup>1</sup>H NMR** (400 MHz, CD<sub>3</sub>OD) δ = 8.10 (d, *J* = 13.6 Hz, 2H, CHCHCN), 7.40 (dd, *J*<sub>1</sub> = *J*<sub>2</sub> = 7.5 Hz, 2H, H<sub>5</sub>, H<sub>5'</sub>), 7.34 (t, *J* = 7.5 Hz, 2H, H<sub>7</sub>, H<sub>7'</sub>), 7.29 (dd, *J* = 7.9, 2.5 Hz, 2H, H<sub>8</sub>, H<sub>8'</sub>), 7.15 (dd, *J*<sub>1</sub> = *J*<sub>2</sub> = 7.5 Hz, 2H, H<sub>6</sub>, H<sub>6'</sub>), 6.61 (dd, *J*<sub>1</sub> = *J*<sub>2</sub> = 13.6 Hz, 1H, CHCHCHCN), 6.48 (d, *J* = 13.6 Hz, 1H, CHCN), 6.17 (d, *J* = 13.6 Hz, 1H, CHCN), 4.32 (t, *J* = 7.5 Hz, 2H, CH<sub>2</sub>CH<sub>2</sub>CH<sub>2</sub>SO<sub>3</sub>), 4.13 (t, *J* = 7.4 Hz, 2H, CH<sub>2</sub>CH<sub>2</sub>CH<sub>2</sub>NH), 3.81 (s, 2H, CH<sub>2</sub>NH<sub>3</sub><sup>+</sup>), 3.42 (t, *J* = 7.4 Hz, 2H, CH<sub>2</sub>NH), 3.03 (t, *J* = 7.5 Hz, 2H, CH<sub>2</sub>SO<sub>3</sub>), 2.23 (tt, *J*<sub>1</sub> = *J*<sub>2</sub> = 7.5 Hz, 2H, CH<sub>2</sub>CH<sub>2</sub>SO<sub>3</sub>), 1.96 (tt, *J*<sub>1</sub> = *J*<sub>2</sub> = 7.4 Hz, 2H, CH<sub>2</sub>CH<sub>2</sub>NH), 1.59 (s, 12H, CyCH<sub>3</sub>); **<sup>13</sup>C NMR** (101 MHz, CD<sub>3</sub>OD) δ = 173.5 (C<sub>2</sub>, C<sub>2'</sub>), 172.7 (C<sub>3</sub>, C<sub>3'</sub>), 166.4 (CO), 154.2 (CHCHCN), 153.7 (CHCHCN), 142.0 (C<sub>9</sub>, C<sub>9'</sub>), 141.3 (C<sub>4</sub>, C<sub>4'</sub>), 128.4 (C<sub>7</sub>, C<sub>7'</sub>), 126.1 (CHCHCHCN), 125.0 (C<sub>6</sub>, C<sub>6'</sub>), 122.1 (C<sub>5</sub>, C<sub>5'</sub>), 110.7 (C<sub>8</sub>, C<sub>8'</sub>), 103.9 (CHCN), 49.1 (CH<sub>2</sub>NH<sub>3</sub>), 47.5 (CH<sub>2</sub>SO<sub>3</sub>), 45.3, 41.4 (CH<sub>2</sub>CH<sub>2</sub>CH<sub>2</sub>SO<sub>3</sub>), 40.4 (CH<sub>2</sub>CH<sub>2</sub>CH<sub>2</sub>NH), 36.5 (CH<sub>2</sub>NH), 26.9 (CH<sub>2</sub>CH<sub>2</sub>NH), 26.6 (CyCH<sub>3</sub>), 22.8 (CH<sub>2</sub>CH<sub>2</sub>SO<sub>3</sub>); **HRMS**: *m/z* (ESI<sup>+</sup>) calc. for C<sub>33</sub>H<sub>42</sub>N<sub>4</sub>O<sub>4</sub>S [M+H]<sup>+</sup>: 591.3014; Obs.: 591.3000; **ν<sub>max</sub>**: (FT-ATR)/cm<sup>-1</sup>: 2918, 2856, 1683, 1495, 1461, 1388, 1145, 1106, 1034, 928, 799, 752, 710.

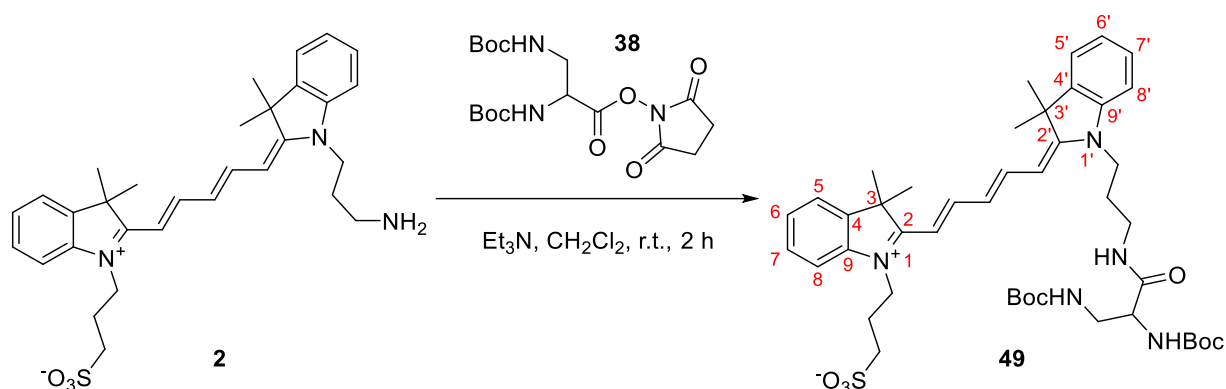

A mixture of **2** (19 mg, 36 μmol), **38** (28 mg, 70 μmol), and triethylamine (24 μL, 0.18 mmol) in dichloromethane (1 mL) was stirred at r.t. for 2 h. The reaction mixture was then concentrated under reduced pressure, and the residue was purified via flash column chromatography on silica gel, eluting with MeOH:CH<sub>2</sub>Cl<sub>2</sub> (5:95). Fractions containing the product were concentrated under reduced pressure to provide a blue oil. (11 mg, 13 μmol, 38%).

**R<sub>f</sub>**: 0.32 (5:95, MeOH:CH<sub>2</sub>Cl<sub>2</sub>, visible light active); **<sup>1</sup>H NMR** (400 MHz, CD<sub>3</sub>OD) δ = 8.22 (dd, *J* = 13.0 Hz, 2H, 2 × CHCHCN), 7.44 (d, *J* = 7.3 Hz, 2H, H<sub>5</sub>, H<sub>5'</sub>), 7.40-7.36 (m, 2H, H<sub>7</sub>, H<sub>7'</sub>), 7.36-7.28 (m, 2H, H<sub>8</sub>, H<sub>8'</sub>), 7.20 (dd, *J*<sub>1</sub> = *J*<sub>2</sub> = 7.3 Hz, 2H, H<sub>6</sub>, H<sub>6'</sub>), 6.67 (dd, *J*<sub>1</sub> = *J*<sub>2</sub> = 13.0 Hz, 1H, CHCHCHCN), 6.38 (d, *J* = 13.0 Hz, 1H, CHCN), 6.29 (t, *J*

= 13.0 Hz, 1H,  $\text{CHCN}$ ), 4.40-4.24 (m, 2H,  $\text{CH}_2\text{CH}_2\text{CH}_2\text{SO}_3$ ), 4.13-4.07 (m, 3H,  $\text{CH}_2\text{CH}_2\text{CH}_2\text{NH}$ ,  $\text{CHCO}$ ), 3.40-3.33 (m, 2H,  $\text{CH}_2\text{NH}$ ), 3.30-3.23 (m, 2H,  $\text{CH}_2\text{NHBoc}$ ), 2.98 (t,  $J = 6.9$  Hz, 2H,  $\text{CH}_2\text{SO}_3$ ), 2.23 (tt,  $J_1 = J_2 = 6.9$  Hz, 2H,  $\text{CH}_2\text{CH}_2\text{SO}_3$ ), 1.97 (tt,  $J_1 = J_2 = 7.0$  Hz, 2H,  $\text{CH}_2\text{CH}_2\text{NH}$ ), 1.66 (s, 12H,  $\text{CyCH}_3$ ), 1.40 (s, 18H, 2  $\times$  Boc);  $^{13}\text{C}$  NMR (101 MHz,  $\text{CD}_3\text{OD}$ )  $\delta = 173.1$  ( $\text{C}_2$ ,  $\text{C}_2'$ ), 172.2 ( $\text{C}_3$ ,  $\text{C}_3'$ ), 167.8 ( $\text{CON}$ ), 157.4 ( $\text{CHCHCN}$ ), 156.5 ( $\text{CHCHCN}$ ), 142.2 ( $\text{C}_9/\text{C}_9'$ ), 142.1 ( $\text{C}_9/\text{C}_9'$ ), 141.3 ( $\text{C}_4/\text{C}_4'$ ), 141.2 ( $\text{C}_4/\text{C}_4'$ ), 128.5 ( $\text{C}_7$ ,  $\text{C}_7'$ ), 126.1 ( $\text{CHCHCHCN}$ ), 124.8 ( $\text{C}_6$ ,  $\text{C}_6'$ ), 122.1 ( $\text{C}_5$ ,  $\text{C}_5'$ ), 110.8 ( $\text{C}_8$ ,  $\text{C}_8'$ ), 103.1 ( $\text{CHCN}$ ), 103.4 ( $\text{CHCN}$ ), 80.9 ( $\text{CMe}_3$ ), 80.6 ( $\text{CMe}_3$ ), 56.0 ( $\text{CH}_2\text{NHBoc}$ ), 49.3 ( $\text{CHCO}$ ), 48.3 ( $\text{CH}_2\text{SO}_3$ ), 42.7 ( $\text{CH}_2\text{CH}_2\text{CH}_2\text{SO}_3$ ), 41.5 ( $\text{CH}_2\text{CH}_2\text{CH}_2\text{NH}$ ), 36.6 ( $\text{CH}_2\text{NH}$ ), 27.4 ( $\text{CyCH}_3$ ), 26.6 (Boc), 26.6 ( $\text{CH}_2\text{CH}_2\text{NH}$ ), 22.8 ( $\text{CH}_2\text{CH}_2\text{SO}_3$ ); HRMS:  $m/z$  (ESI $^+$ ) calc. for  $\text{C}_{44}\text{H}_{61}\text{N}_5\text{O}_8\text{S}$   $[\text{M}+\text{H}]^+$ : 820.4314; Obs.: 820.4341;  $\nu_{\text{max}}$ : (FT-ATR)/ $\text{cm}^{-1}$ : 3655, 2981, 2927, 1707, 1481, 1453, 1381, 1138, 1101, 1035, 926, 803, 753, 709, 552; m.p.: 168-171  $^\circ\text{C}$ .

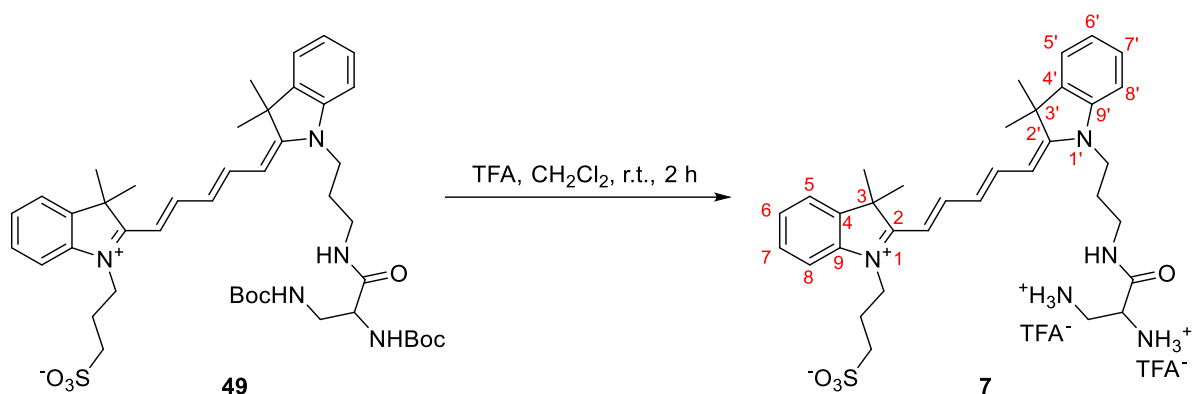

Trifluoroacetic acid (1 mL) was added dropwise to a stirred solution of **49** (11 mg, 13  $\mu\text{mol}$ ) in dichloromethane (9 mL) and the mixture was stirred at r.t. for 2 h. The reaction was then concentrated under reduced pressure to  $\sim 5$  mL, and the remaining solution added dropwise to diethyl ether (200 mL). The resultant precipitate was collected by filtration, washed with diethyl ether (30 mL), and dried in air. The solid was then dissolved in methanol (10 mL) and concentrated under reduced pressure to afford a blue oil. (10 mg, 13  $\mu\text{mol}$ , quantitative yield).

**R<sub>f</sub>**: 0.15 (1:9,  $\text{MeOH}:\text{CH}_2\text{Cl}_2$ , visible light active);  $^1\text{H}$  NMR (400 MHz,  $\text{CD}_3\text{OD}$ )  $\delta = 8.13$  (dd,  $J_1 = J_2 = 13.6$  Hz, 2H, 2  $\times$   $\text{CHCHCN}$ ), 7.48-7.40 (m, 2H,  $\text{H}_5$ ,  $\text{H}_5'$ ), 7.38-7.34 (m, 2H,  $\text{H}_7$ ,  $\text{H}_7'$ ), 7.32-7.25 (m, 2H,  $\text{H}_8$ ,  $\text{H}_8'$ ), 7.25-7.12 (m, 2H,  $\text{H}_6$ ,  $\text{H}_6'$ ), 6.66 (dd,  $J_1 = J_2 = 13.6$  Hz, 1H,  $\text{CHCHCHCN}$ ), 6.52 (d,  $J = 13.6$  Hz, 1H,  $\text{CHCN}$ ), 6.21 (d,  $J = 13.6$  Hz, 1H,  $\text{CHCN}$ ), 4.36-4.32 (m, 3H,  $\text{CH}_2\text{CH}_2\text{CH}_2\text{SO}_3/\text{CHCO}$ ), 4.19-4.15 (m, 2H,

CH<sub>2</sub>CH<sub>2</sub>CH<sub>2</sub>NH), 3.60-3.54 (m, 2H, CH<sub>2</sub>NH), 3.44-3.38 (m, 2H, CH<sub>2</sub>SO<sub>3</sub>), 3.08 (t, *J* = 7.0 Hz, 2H, CH<sub>2</sub>NH<sub>3</sub><sup>+</sup>), 2.24 (tt, *J*<sub>1</sub> = *J*<sub>2</sub> = 7.5 Hz, 2H, CH<sub>2</sub>CH<sub>2</sub>SO<sub>3</sub>), 2.02 (tt, *J*<sub>1</sub> = *J*<sub>2</sub> = 7.0 Hz, 2H, CH<sub>2</sub>CH<sub>2</sub>NH), 1.62 (s, 12H, CyCH<sub>3</sub>); <sup>13</sup>C NMR (101 MHz, CD<sub>3</sub>OD) δ = 174.9 (C2, C2'), 174.2 (C3, C3'), 168.5 (CON), 155.5 (CHCHCN), 154.9 (CHCHCN), 143.4 (C9, C9'), 142.7 (C4, C4'), 129.3 (C7, C7'), 126.9 (CHCHCHCN), 126.3 (C6, C6'), 123.6, (C5, C5'), 111.9 (C8, C8'), 105.5 (CHCN), 104.4 (CHCN), 57.4 (CH<sub>2</sub>NH<sub>3</sub><sup>+</sup>), 50.6 (CHCO), 50.5 (CH<sub>2</sub>SO<sub>3</sub>), 44.3 (CH<sub>2</sub>CH<sub>2</sub>CH<sub>2</sub>SO<sub>3</sub>), 42.8 (CH<sub>2</sub>CH<sub>2</sub>CH<sub>2</sub>NH), 38.4 (CH<sub>2</sub>NH), 28.4 (CyCH<sub>3</sub>), 24.5, (CH<sub>2</sub>CH<sub>2</sub>NH), 24.2 (CH<sub>2</sub>CH<sub>2</sub>SO<sub>3</sub>); **HRMS**: *m/z* (ESI<sup>+</sup>) calc. for C<sub>34</sub>H<sub>45</sub>N<sub>5</sub>O<sub>4</sub>S [M+H]<sup>+</sup>: 620.3265; Obs.: 620.3265; *ν*<sub>max</sub>: (FT-ATR)/cm<sup>-1</sup>: 2978, 2929, 1680, 1488, 1456, 1384, 1145, 1038 1018, 995, 926, 800; **m.p.**: 178-181 °C.

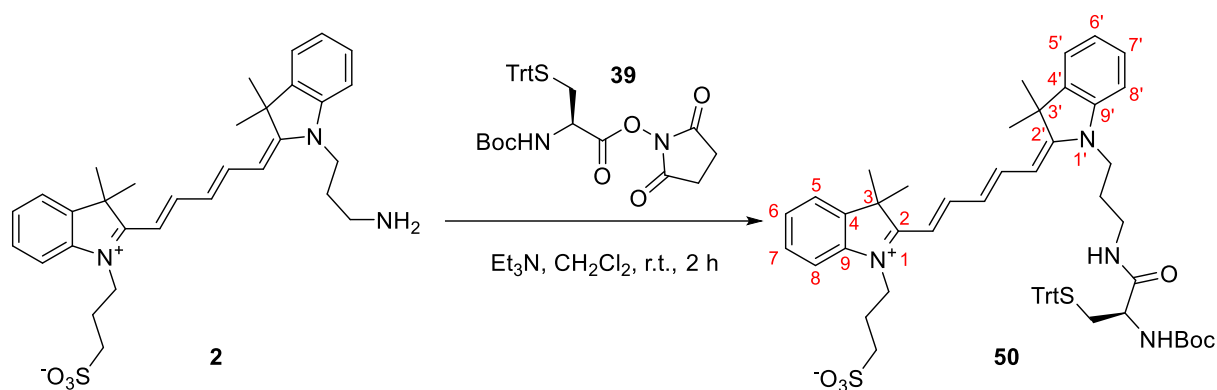

A mixture of **2** (30 mg, 56 μmol), **39** (90 mg, 0.169 mmol), and triethylamine (29 μL, 0.280 mmol) in dichloromethane (2 mL) was stirred at r.t. for 2 h. The reaction mixture was then concentrated under reduced pressure and the residue was purified via flash column chromatography on silica gel, eluting with MeOH:CH<sub>2</sub>Cl<sub>2</sub> (5:95). Fractions containing the product were concentrated under reduced pressure to provide a blue solid (45 mg, 46 μmol, 84%). The product was carried into the next step without further characterisation.

**R<sub>f</sub>**: 0.32 (5:95, MeOH:CH<sub>2</sub>Cl<sub>2</sub>, visible light active); <sup>1</sup>H NMR (400 MHz, CD<sub>3</sub>OD) δ = 8.24 (dd, *J* = 13.5, 13.0 Hz, 2H, 2 × CHCHCN), 7.45 (dd, *J* = 7.3, 2.2 Hz, 2H, H<sub>5</sub>, H<sub>5'</sub>), 7.42-7.38 (m, 2H, H<sub>7</sub>, H<sub>7'</sub>), 7.34 (d, *J* = 7.7 Hz, 6H, TrtPhH<sub>2</sub>), 7.31-7.26 (m, 2H, H<sub>8</sub>, H<sub>8'</sub>), 7.26-7.20 (m, 8H, TrtPhH<sub>3</sub> / H<sub>6</sub>, H<sub>6'</sub>), 7.17 (t, *J* = 7.7 Hz, 3H, TrtPhH<sub>4</sub>), 6.63 (dd, *J*<sub>1</sub> = *J*<sub>2</sub> = 13.0 Hz, 1H, CHCHCHCN), 6.34 (d, *J* = 13.5 Hz, 1H, CHCN), 6.25 (d, *J* = 13.5 Hz, 1H, CHCN), 4.30 (t, *J* = 8.3 Hz, 2H, CH<sub>2</sub>CH<sub>2</sub>CH<sub>2</sub>SO<sub>3</sub>), 4.04 (t, *J* = 6.9 Hz, 2H, CH<sub>2</sub>CH<sub>2</sub>CH<sub>2</sub>NH), 3.96 (t, *J* = 6.9 Hz, 1H, CHCO), 3.33 (d, *J* = 6.9 Hz, 2H, CH<sub>2</sub>NH), 2.95 (t, *J* = 7.0 Hz, 2H, CH<sub>2</sub>STrt), 2.57-2.42 (m, 2H, CH<sub>2</sub>SO<sub>3</sub>), 2.24-2.17 (m, 2H,

CH<sub>2</sub>CH<sub>2</sub>SO<sub>3</sub>), 1.99-1.92 (m, 2H, CH<sub>2</sub>CH<sub>2</sub>NH), 1.68 (s, 12H, CyCH<sub>3</sub>), 1.40 (s, 9H, Boc); **HRMS**: m/z (ESI<sup>+</sup>) calc. for C<sub>58</sub>H<sub>66</sub>N<sub>4</sub>O<sub>6</sub>S<sub>2</sub> [M+H]<sup>+</sup>: 979.4497; Obs.: 979.4542; **v**<sub>max</sub>: (FT-ATR)/cm<sup>-1</sup>: 3419, 2925, 2859, 1711, 1489, 1455, 1382, 1338, 1216, 1140, 1104, 1036, 1018, 926, 750, 707; **m.p.**: 167-154 °C.

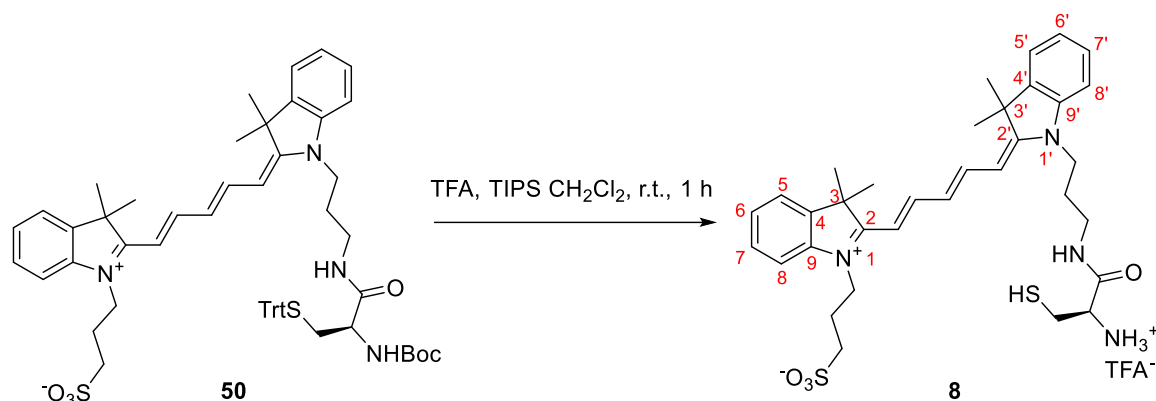

Trifluoroacetic acid (2 mL) was added dropwise to a stirred solution of **50** (40 mg, 41 μmol) and triisopropylsilane (43 μL, 0.210 mmol) in dichloromethane (10 mL), and the mixture stirred at r.t. for 1 h. The reaction was then concentrated under reduced pressure to ~5 mL, and the remaining solution added dropwise to diethyl ether (200 mL). The resultant precipitate was collected by filtration, washed with diethyl ether (30 mL), and dried in air. The solid was then dissolved in methanol (10 mL) and concentrated under reduced pressure to afford a blue oil. (22 mg, 35 μmol, 86%).

**R<sub>f</sub>**: 0.29 (1:9, MeOH:CH<sub>2</sub>Cl<sub>2</sub>, visible light active); **<sup>1</sup>H NMR** (400 MHz, CD<sub>3</sub>OD) δ = 8.13 (dd, *J* = 13.5, 13.0 Hz, 2H, 2 × CHCHCN), 7.41 (dd, *J* = 7.4, 1.1 Hz, 2H, H<sub>5</sub>, H<sub>5'</sub>), 7.38-7.33 (m, 2H, H<sub>7</sub>, H<sub>7'</sub>), 7.33-7.26 (m, 2H, H<sub>8</sub>, H<sub>8'</sub>), 7.17 (ddd, *J*<sub>1</sub> = *J*<sub>2</sub> = 7.5, *J*<sub>3</sub> = 1.0 Hz, 2H, H<sub>6</sub>, H<sub>6'</sub>), 6.64 (dd, *J*<sub>1</sub> = *J*<sub>2</sub> = 13.0 Hz, 1H, CHCHCHCN), 6.48 (d, *J* = 13.5 Hz, 1H, CHCN), 6.21 (d, *J* = 13.5 Hz, 1H, CHCN), 4.34 (t, *J* = 7.4 Hz, 2H, CH<sub>2</sub>CH<sub>2</sub>CH<sub>2</sub>SO<sub>3</sub>), 4.18-4.10 (m, 3H, CH<sub>2</sub>CH<sub>2</sub>CH<sub>2</sub>NH, CHCO), 3.53-3.40 (m, 2H, CH<sub>2</sub>NH), 3.17-3.11 (m, 1H, CH<sub>2</sub>SH), 3.09-3.00 (m, 3H, CH<sub>2</sub>SO<sub>3</sub>, CH<sub>2</sub>SH), 2.26-2.20 (m, 2H, CH<sub>2</sub>CH<sub>2</sub>SO<sub>3</sub>), 2.05-1.93 (m, 2H, CH<sub>2</sub>CH<sub>2</sub>NH), 1.61 (s, 12H, CyCH<sub>3</sub>); **<sup>13</sup>C NMR** (101 MHz, CD<sub>3</sub>OD) δ = 173.5 (C<sub>2</sub>, C<sub>2'</sub>), 172.7 (C<sub>3</sub>, C<sub>3'</sub>), 167.5 (CONH), 154.3 (CHCHCN), 153.7 (CHCHCN), 142.0 (C<sub>9</sub>/C<sub>9'</sub>), 141.3 (C<sub>9</sub>/C<sub>9'</sub>), 142.0 (C<sub>4</sub>/C<sub>4'</sub>), 141.3 (C<sub>4</sub>/C<sub>4'</sub>), 128.4 (C<sub>7</sub>, C<sub>7'</sub>), 126.2 (CHCHCHCN), 125.0 (C<sub>6</sub>/C<sub>6'</sub>), 124.8 (C<sub>6</sub>/C<sub>6'</sub>), 122.1 (C<sub>5</sub>, C<sub>5'</sub>), 110.7 (C<sub>8</sub>/C<sub>8'</sub>), 110.4 (C<sub>8</sub>/C<sub>8'</sub>), 103.9 (CHCN), 102.9 (CHCN), 54.9 (CH<sub>2</sub>SH), 49.1 (CHCO), 48.3 (CH<sub>2</sub>SO<sub>3</sub>), 42.6 (CH<sub>2</sub>CH<sub>2</sub>CH<sub>2</sub>SO<sub>3</sub>), 41.5 (CH<sub>2</sub>CH<sub>2</sub>CH<sub>2</sub>NH), 36.8 (CH<sub>2</sub>NH), 26.9

(CyCH<sub>3</sub>), 26.6 (CH<sub>2</sub>CH<sub>2</sub>NH), 22.8 (CH<sub>2</sub>CH<sub>2</sub>SO<sub>3</sub>); **HRMS**: m/z (ESI<sup>+</sup>) calc. for C<sub>34</sub>H<sub>44</sub>N<sub>4</sub>O<sub>4</sub>S<sub>2</sub> [M+H]<sup>+</sup>: 637.2877; Obs.: 637.2873; **v**<sub>max</sub>: (FT-ATR)/cm<sup>-1</sup>: 3412, 2966, 1677, 1490, 1455, 1381, 1338, 1202, 1139, 1101, 1035, 1016, 925, 798, 751, 709; **m.p.**: 194-197 °C.

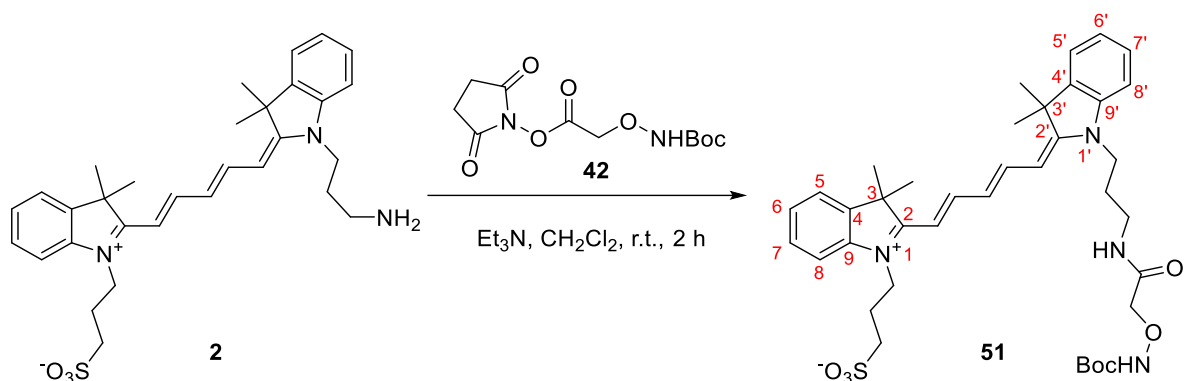

A mixture of **2** (30 mg, 56 μmol), **42** (49 mg, 0.170 mmol), and triethylamine (29 μL, 0.28 mmol) in dichloromethane (2 mL) was stirred for at r.t. for 2 h. The reaction mixture was then concentrated under reduced pressure and the residue was purified via flash column chromatography on silica gel, eluting with MeOH:CH<sub>2</sub>Cl<sub>2</sub> (5:95). Fractions containing the product were concentrated under reduced pressure to provide a blue oil (15 mg, 21 μmol, 38%).

**R<sub>f</sub>**: 0.24 (1:9, MeOH:CH<sub>2</sub>Cl<sub>2</sub>, visible light active); **<sup>1</sup>H NMR** (400 MHz, CDCl<sub>3</sub>) δ = 9.00 (s, 1H, NHBoc), 7.86-7.78 (m, 2H, 2 × CHCHCN) 7.39-7.32 (m, 2H, H<sub>5</sub>, H<sub>5'</sub>), 7.31 (d, *J* = 7.8 Hz, 2H, H<sub>7</sub>, H<sub>7'</sub>), 7.24-7.18 (m, 1H, H<sub>8</sub>/H<sub>8'</sub>), 7.20-7.12 (m, 2H, H<sub>8</sub>/H<sub>8'</sub>, H<sub>6</sub>/H<sub>6'</sub>), 7.10 (d, *J* = 7.8 Hz, 1H, H<sub>6</sub>/H<sub>6'</sub>), 7.08-7.03 (m, 1H, CHCN), 6.92-6.66 (m, 1H, 2 × CHCN), 6.05 (dd, *J*<sub>1</sub> = *J*<sub>2</sub> = 13.4 Hz, 1H, CHCHCHCN), 4.48 (s, 2H, CH<sub>2</sub>O), 4.46-4.40 (m, 2H, CH<sub>2</sub>CH<sub>2</sub>CH<sub>2</sub>SO<sub>3</sub>), 4.07 (t, *J* = 7.8 Hz, 2H, CH<sub>2</sub>CH<sub>2</sub>CH<sub>2</sub>NH), 3.45 (t, *J* = 7.8 Hz, 2H, CH<sub>2</sub>NH), 3.03 (t, *J* = 7.5 Hz, 2H, CH<sub>2</sub>SO<sub>3</sub>), 2.32-2.21 (m, 2H, CH<sub>2</sub>CH<sub>2</sub>SO<sub>3</sub>), 2.09-1.98 (m, 2H, CH<sub>2</sub>CH<sub>2</sub>NH), 1.64 (s, 12H, CyCH<sub>3</sub>), 1.37 (s, 9H, Boc); **<sup>13</sup>C NMR** (101 MHz, CDCl<sub>3</sub>) δ = 174.7 (C2/C2'), 174.3 (C2/C2'), 172.3 (C3/C3'), 172.1 (C3/C3'), 160.6 (CON), 155.3 (CHCHCN), 155.0 (CHCHCN), 143.5 (C9, C9'), 142.2 (C4, C4'), 130.4 (C7/C7'), 130.3 (C7/C7'), 128.9 (CHCHCHCN), 126.8 (C6/C6'), 126.4 (C6/C6'), 123.7 (C5/C5'), 123.6 (C5/C5'), 112.3 (C8/C8'), 111.9 (C8/C8'), 104.6 (CHCN), 104.5 (CHCN), 80.8 (CMe<sub>3</sub>), 77.5 (CH<sub>2</sub>O), 48.9 (CH<sub>2</sub>SO<sub>3</sub><sup>-</sup>), 47.6 (CH<sub>2</sub>CH<sub>2</sub>CH<sub>2</sub>SO<sub>3</sub><sup>-</sup>), 43.3 (CH<sub>2</sub>CH<sub>2</sub>CH<sub>2</sub>NH), 37.2 (CH<sub>2</sub>NH), 29.7 (Boc), 29.0 (CH<sub>2</sub>CH<sub>2</sub>NH), 26.8 (CyCH<sub>3</sub>), 24.9

( $\text{CH}_2\text{CH}_2\text{SO}_3^-$ ); **HRMS**:  $m/z$  (ESI<sup>+</sup>) calc. for  $\text{C}_{38}\text{H}_{50}\text{N}_4\text{O}_7\text{S}$   $[\text{M}+\text{H}]^+$ : 707.3473; Obs.: 707.3492.

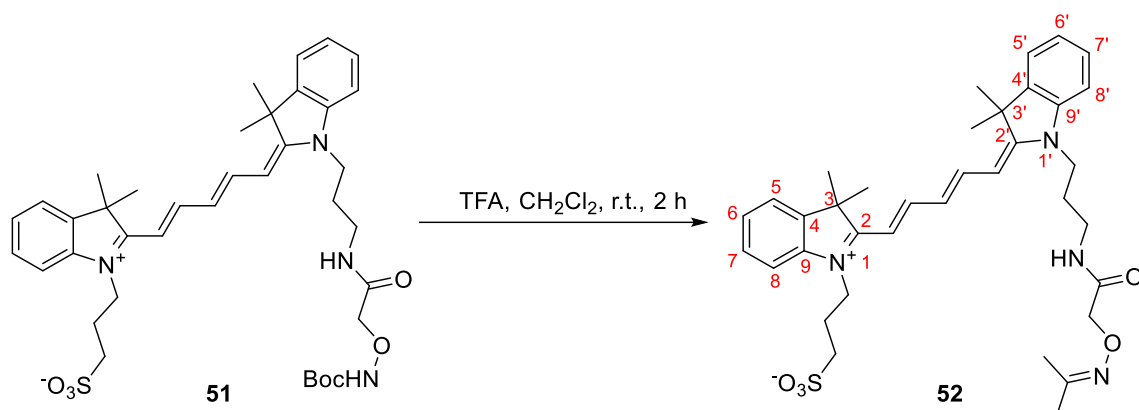

Trifluoroacetic acid (4 mL) was added dropwise to a stirred solution of **51** (30 mg, 42  $\mu\text{mol}$ ) in dichloromethane (4 mL) and the mixture was stirred at r.t. for 2 h. The reaction was then concentrated under reduced pressure to ~5 mL, and the remaining solution added dropwise to diethyl ether (400 mL). The resultant precipitate was collected by filtration, washed with diethyl ether (30 mL), and dried in air. The solid was dissolved in methanol (10 mL) and concentrated under reduced pressure to afford a blue oil (20 mg, 31  $\mu\text{mol}$ , 74%).

**R<sub>f</sub>**: 0.21 (1:9, MeOH: $\text{CH}_2\text{Cl}_2$ , visible light active); **<sup>1</sup>H NMR** (400 MHz,  $\text{CD}_3\text{OD}$ )  $\delta$  = 8.24 (dd,  $J_1 = J_2 = 13.5$  Hz, 2H, 2  $\times$   $\text{CHCHCN}$ ), 7.98 (t,  $J = 6.1$  Hz, 1H,  $\text{NHCO}$ ), 7.45 (d,  $J = 7.5$  Hz, 2H,  $\text{H}_5$ ,  $\text{H}_{5'}$ ), 7.41-7.33 (m, 3H,  $\text{H}_7$ ,  $\text{H}_{7'}$ ,  $\text{H}_8/\text{H}_{8'}$ ), 7.31-7.17 (m, 3H,  $\text{H}_6$ ,  $\text{H}_{6'}$ ,  $\text{H}_8/\text{H}_{8'}$ ), 6.64 (dd,  $J_1 = J_2 = 13.0$  Hz, 1H,  $\text{CHCHCHCN}$ ), 6.40 (d,  $J = 13.5$  Hz, 1H,  $\text{CHCN}$ ), 6.26 (d,  $J = 13.5$  Hz, 1H,  $\text{CHCN}$ ), 4.43 (s, 2H,  $\text{CH}_2\text{O}$ ), 4.32 (t,  $J = 7.2$  Hz, 2H,  $\text{CH}_2\text{CH}_2\text{CH}_2\text{SO}_3$ ), 4.09 (t,  $J = 7.6$  Hz, 2H,  $\text{CH}_2\text{CH}_2\text{CH}_2\text{NH}$ ), 3.43-3.36 (m, 2H,  $\text{CH}_2\text{NH}$ ), 2.97 (t,  $J = 7.2$  Hz, 2H,  $\text{CH}_2\text{SO}_3$ ), 2.22 (tt,  $J_1 = J_2 = 7.2$  Hz, 2H,  $\text{CH}_2\text{CH}_2\text{SO}_3$ ), 2.01 (tt,  $J_1 = J_2 = 7.6$  Hz, 2H,  $\text{CH}_2\text{CH}_2\text{NH}$ ), 1.94 (s, 3H,  $\text{CH}_3$ ), 1.83 (s, 3H,  $\text{CH}_3$ ), 1.68 (s, 12H,  $\text{CyCH}_3$ ). **<sup>13</sup>C NMR** (101 MHz,  $\text{CD}_3\text{OD}$ )  $\delta$  = 174.5 ( $\text{C}_2/\text{C}_2'$ ), 173.7 ( $\text{C}_2/\text{C}_2'$ ), 173.5 ( $\text{C}_3/\text{C}_3'$ ), 173.1 ( $\text{C}_3/\text{C}_3'$ ), 172.0 ( $\text{CON}$ ), 157.8 ( $\text{CHCHCN}$ ), 154.6 ( $\text{CHCHCN}$ ), 142.2 ( $\text{C}_9/\text{C}_9'$ ), 142.1 ( $\text{C}_9/\text{C}_9'$ ), 141.3 ( $\text{C}_4/\text{C}_4'$ ), 141.2 ( $\text{C}_4/\text{C}_4'$ ), 128.5 ( $\text{C}_7/\text{C}_7'$ ), 128.4 ( $\text{C}_7/\text{C}_7'$ ), 125.8 ( $\text{CHCHCHCN}$ ), 125.0 ( $\text{C}_6/\text{C}_6'$ ), 124.8 ( $\text{C}_6/\text{C}_6'$ ), 122.1 ( $\text{C}_5/\text{C}_5'$ ), 122.1 ( $\text{C}_5/\text{C}_5'$ ), 110.8 ( $\text{C}_8/\text{C}_8'$ ), 110.5 ( $\text{C}_8/\text{C}_8'$ ), 103.4 ( $\text{CHCN}$ ), 102.9 ( $\text{CHCN}$ ), 71.8 ( $\text{CH}_2\text{O}$ ), 49.3 ( $\text{C}=\text{N}$ ), 49.2 ( $\text{CH}_2\text{SO}_3$ ), 42.7 ( $\text{CH}_2\text{CH}_2\text{CH}_2\text{SO}_3$ ), 41.3 ( $\text{CH}_2\text{CH}_2\text{CH}_2\text{NH}$ ), 36.2 ( $\text{CH}_2\text{NH}$ ), 27.6 ( $\text{CyCH}_3$ ), 26.9 ( $\text{CH}_2\text{CH}_2\text{NH}$ ), 26.6 ( $\text{CH}_3$ ), 26.5 ( $\text{CH}_3$ ), 22.8

(CH<sub>2</sub>CH<sub>2</sub>SO<sub>3</sub>); **HRMS**: m/z (ESI<sup>+</sup>) calc. for C<sub>36</sub>H<sub>45</sub>N<sub>4</sub>O<sub>5</sub>S [M+H]<sup>+</sup>: 647.3261; Obs.: 647.3261;

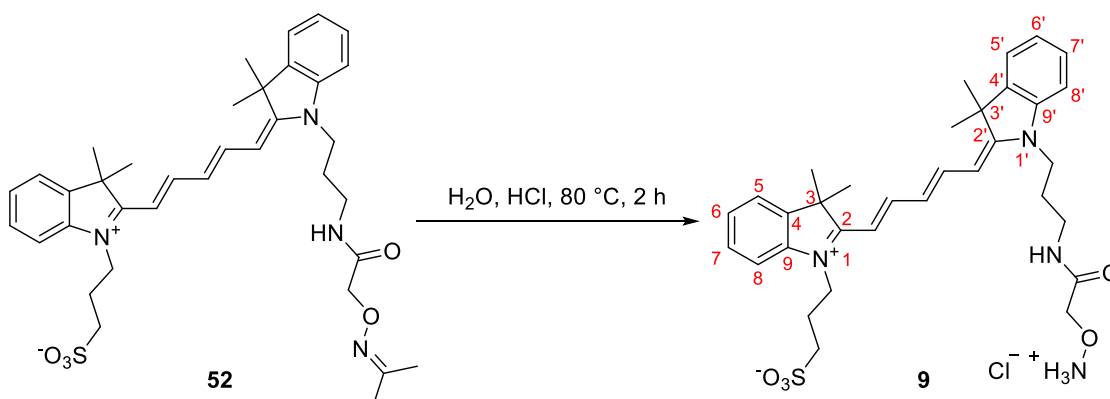

**52** (15 mg, 23 μmol) was dissolved in hydrochloric acid (0.1 M 3 mL) and stirred at 80 °C for 2 h. The reaction mixture was then lyophilised to give the product as a blue oil (14 mg, 23 μmol, 99%). Due to the reactivity of the oxime, the product was used directly in the next experiments without further analysis.

**R<sub>f</sub>**: 0.14 (1:9, MeOH:CH<sub>2</sub>Cl<sub>2</sub>, visible light active); **<sup>1</sup>H NMR** (400 MHz, CD<sub>3</sub>OD) δ = 8.30-8.24 (m, 2H, 2 × CHCHCN), 7.49-7.43 (m, 2H, H5, H5'), 7.46-7.39 (m, 3H, H7, H7', H8/H8'), 7.33-7.24 (m, 3H, H6, H6', H8/H8'), 6.68 (dd, *J*<sub>1</sub> = *J*<sub>2</sub> = 12.4 Hz, 1H, CHCHCHCN), 6.59 (d, *J* = 13.7 Hz, 1H, CHCN), 6.24 (d, *J* = 13.7 Hz, 1H, CHCN), 4.64 (s, 2H, CH<sub>2</sub>O), 4.41-4.35 (m, CH<sub>2</sub>CH<sub>2</sub>CH<sub>2</sub>SO<sub>3</sub>), 4.18-4.10 (m, 2H, CH<sub>2</sub>CH<sub>2</sub>CH<sub>2</sub>NH), 3.46-3.42 (m, 2H, CH<sub>2</sub>NH), 3.05-2.98 (m, 2H, CH<sub>2</sub>SO<sub>3</sub>), 2.24-2.30 (m, 2H, CH<sub>2</sub>CH<sub>2</sub>SO<sub>3</sub>), 2.10-2.02 (m, 2H, CH<sub>2</sub>CH<sub>2</sub>NH), 1.76 (s, 12H, CyCH<sub>3</sub>); **HRMS**: m/z (ESI<sup>+</sup>) calc. for C<sub>33</sub>H<sub>42</sub>N<sub>4</sub>O<sub>5</sub>S [M+H]<sup>+</sup>: 607.2949; Obs.: 607.2964.

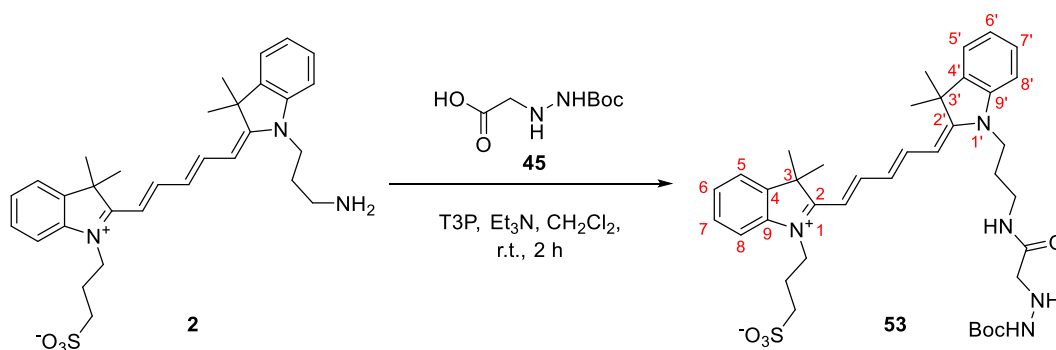

Propylphosphonic anhydride solution (50% w/w in EtOAc, 44 μL, 140 μmol) was added to a stirred solution of **2** (30 mg, 56 μmol), **45** (21 mg, 112 μmol), and triethylamine (39 μL, 281 μmol) in dichloromethane (3 mL) dropwise at 0 °C. The solution was then stirred at r.t. for 16 h. The reaction was concentrated under reduced pressure and the

residue purified via flash column chromatography on silica gel, eluting with MeOH:CH<sub>2</sub>Cl<sub>2</sub> (5:95). Fractions containing the product were concentrated under reduced pressure to provide a blue oil (18 mg, 18  $\mu$ mol, 45%).

**R<sub>f</sub>**: 0.28 (5:95, MeOH:CH<sub>2</sub>Cl<sub>2</sub>, visible light active); **<sup>1</sup>H NMR** (400 MHz, CD<sub>3</sub>OD)  $\delta$  = 8.18 (dd,  $J$  = 13.3, 12.5 Hz, 2H, 2  $\times$  CHCHCN), 7.43 (dd,  $J$  = 7.6, 2.3 Hz 2H, H<sub>5</sub>, H<sub>5'</sub>), 7.39-7.31 (m, 3H, H<sub>7</sub>, H<sub>7'</sub>, H<sub>8</sub>/H<sub>8'</sub>), 7.31-7.25 (m, 1H, H<sub>8</sub>/H<sub>8'</sub>), 7.25-7.16 (m, 2H, H<sub>6</sub>, H<sub>6'</sub>), 6.60 (dd,  $J_1$  =  $J_2$  = 12.5 Hz, 1H, CHCHCHCN), 6.52 (d,  $J$  = 13.3 Hz, 1H, CHCN), 6.16 (d,  $J$  = 13.3 Hz, 1H, CHCN), 5.47 (s, 1H, CH<sub>2</sub>NH), 4.34 (t,  $J$  = 7.6 Hz, 2H, CH<sub>2</sub>CH<sub>2</sub>CH<sub>2</sub>SO<sub>3</sub>), 4.14 (t,  $J$  = 7.8 Hz, 2H, CH<sub>2</sub>CH<sub>2</sub>CH<sub>2</sub>NH), 3.54 (s, 2H, CH<sub>2</sub>NHNHBoc), 3.38 (t,  $J$  = 7.8 Hz 2H, CH<sub>2</sub>NH), 2.98 (t,  $J$  = 7.6 Hz, 2H, CH<sub>2</sub>SO<sub>3</sub>), 2.22 (tt,  $J_1$  =  $J_2$  = 7.6 Hz, 2H, CH<sub>2</sub>CH<sub>2</sub>SO<sub>3</sub>), 2.00 (tt,  $J_1$  =  $J_2$  = 7.8 Hz, 2H, CH<sub>2</sub>CH<sub>2</sub>NH), 1.64 (s, 12H, CyCH<sub>3</sub>), 1.45 (s, 9H, Boc); **<sup>13</sup>C NMR** (101 MHz, CD<sub>3</sub>OD)  $\delta$  = 172.9 (C<sub>2</sub>, C<sub>2'</sub>), 172.8 (C<sub>3</sub>, C<sub>3'</sub>), 163.5 (CON), 154.3 (CHCHCN), 153.7 (CHCHCN), 142.0 (C<sub>9</sub>, C<sub>9'</sub>), 141.3 (C<sub>4</sub>/C<sub>4'</sub>), 141.2 (C<sub>4</sub>/C<sub>4'</sub>), 128.5 (C<sub>7</sub>/C<sub>7'</sub>), 128.4 (C<sub>7</sub>/C<sub>7'</sub>), 125.0 (CHCHCHCN), 124.8 (C<sub>6</sub>, C<sub>6'</sub>), 122.1 (C<sub>5</sub>, C<sub>5'</sub>), 110.8 (C<sub>8</sub>/C<sub>8'</sub>), 110.5 (C<sub>8</sub>/C<sub>8'</sub>), 103.8 (CHCN), 102.9 (CHCN), 79.3, (CMe<sub>3</sub>), 54.9 (CH<sub>2</sub>NHNHBoc), 46.5 (CH<sub>2</sub>SO<sub>3</sub>), 42.6 (CH<sub>2</sub>CH<sub>2</sub>CH<sub>2</sub>SO<sub>3</sub>), 41.2 (CH<sub>2</sub>CH<sub>2</sub>CH<sub>2</sub>NH), 36.2 (CH<sub>2</sub>NH), 27.3 (Boc), 26.9 (CyCH<sub>3</sub>), 26.6 (CH<sub>2</sub>CH<sub>2</sub>NH), 22.7 (CH<sub>2</sub>CH<sub>2</sub>SO<sub>3</sub>); **HRMS**:  $m/z$  (ESI<sup>+</sup>) calc. for C<sub>38</sub>H<sub>51</sub>N<sub>5</sub>O<sub>6</sub>S [M+Na]<sup>+</sup>: 728.3488,; Obs.: 728.3488;  **$\nu_{\max}$** : (FT-ATR)/cm<sup>-1</sup>: 3267, 2974, 2929, 1705, 1658, 1492, 1456, 1338, 1141, 1104, 1018, 926, 802, 756.

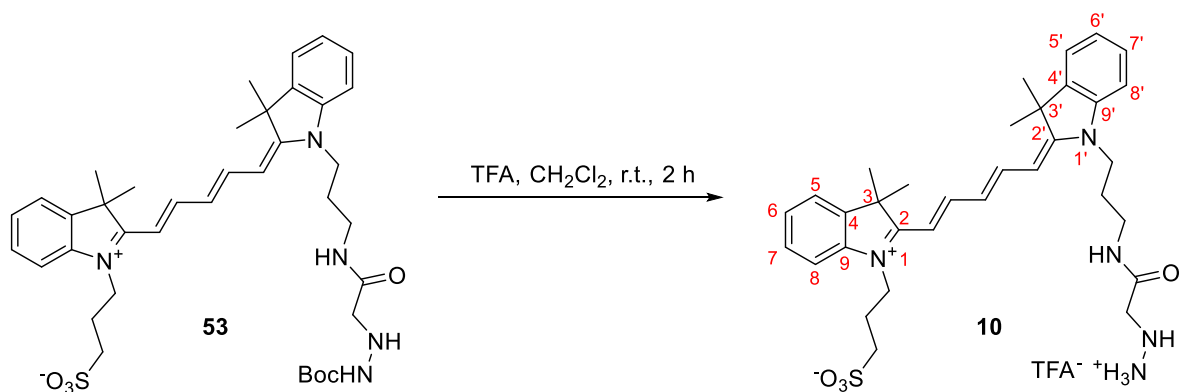

Trifluoroacetic acid (1 mL) was added to a solution of **53** (13 mg, 18  $\mu$ mol) in dichloromethane (5 mL) and stirred at r.t. for 2 h. The reaction mixture was then added dropwise into diethyl ether (400 mL). The resultant precipitate was collected by filtration, washed with diethyl ether (30 mL), and dried in air. The solid was then

dissolved in methanol (30 mL) and concentrated under reduced pressure to give a blue oil (11 mg, 18  $\mu$ mol, quantitative yield).

**R<sub>f</sub>**: 0.13 (5:95, MeOH:CH<sub>2</sub>Cl<sub>2</sub>, visible light active); **<sup>1</sup>H NMR** (400 MHz, CD<sub>3</sub>OD)  $\delta$  = 8.19 (dd,  $J$  = 13.3, 12.5 Hz, 2H, 2  $\times$  CHCHCN), 7.44 (dd,  $J$  = 7.3, 2.0 Hz, 2H, H<sub>5</sub>, H<sub>5'</sub>), 7.41-7.33 (m, 3H, H<sub>7</sub>, H<sub>7'</sub>, H<sub>8</sub>/H<sub>8'</sub>), 7.28 (d,  $J$  = 7.9 Hz, 1H, H<sub>8</sub>/H<sub>8'</sub>) 7.25-7.16 (m, 2H, H<sub>6</sub>, H<sub>6'</sub>), 6.63 (dd,  $J_1$  =  $J_2$  = 12.5 Hz, 1H, CHCHCHCN), 6.52 (d,  $J$  = 13.3 Hz, 1H, CHCN), 6.18 (d,  $J$  = 13.3 Hz, 1H, CHCN), 4.35 (t, 2H,  $J$  = 7.0 Hz, CH<sub>2</sub>CH<sub>2</sub>CH<sub>2</sub>SO<sub>3</sub>), 4.13 (t,  $J$  = 6.9 Hz, 2H, CH<sub>2</sub>CH<sub>2</sub>CH<sub>2</sub>NH), 3.75 (s, 2H, CH<sub>2</sub>NHNH<sub>2</sub>), 3.39 (t,  $J$  = 6.9 Hz, 2H, CH<sub>2</sub>NH), 3.01 (t,  $J$  = 7.0 Hz, 2H, CH<sub>2</sub>SO<sub>3</sub>), 2.23 (tt,  $J_1$  =  $J_2$  = 7.0 Hz, 2H, CH<sub>2</sub>CH<sub>2</sub>SO<sub>3</sub>), 1.99 (tt,  $J_1$  =  $J_2$  = 6.9 Hz, 2H, CH<sub>2</sub>CH<sub>2</sub>NH), 1.66 (s, 12H, CyCH<sub>3</sub>); **<sup>13</sup>C NMR** (101 MHz, CD<sub>3</sub>OD)  $\delta$  = 173.6 (C<sub>2</sub>, C<sub>2'</sub>), 172.8 (C<sub>3</sub>, C<sub>3'</sub>), 163.2 (CON), 154.4 (CHCHCN), 153.8 (CHCHCN), 142.0 (C<sub>9</sub>, C<sub>9'</sub>), 141.2 (C<sub>4</sub>, C<sub>4'</sub>), 128.5 (C<sub>7</sub>, C<sub>7'</sub>), 125.0 (CHCHCHCN), 124.8 (C<sub>6</sub>, C<sub>6'</sub>), 122.1 (C<sub>5</sub>, C<sub>5'</sub>), 110.7 (C<sub>8</sub>/C<sub>8'</sub>), 110.4 (C<sub>8</sub>/C<sub>8'</sub>), 104.0 (CHCN), 102.6 (CHCN), 49.2 (CH<sub>2</sub>NHNH<sub>2</sub>), 47.2 (CH<sub>2</sub>SO<sub>3</sub>), 42.4 (CH<sub>2</sub>CH<sub>2</sub>CH<sub>2</sub>SO<sub>3</sub>), 41.2 (CH<sub>2</sub>CH<sub>2</sub>CH<sub>2</sub>NH), 36.3 (CH<sub>2</sub>NH), 26.9 (CyCH<sub>3</sub>), 26.6 (CH<sub>2</sub>CH<sub>2</sub>NH), 22.7 (CH<sub>2</sub>CH<sub>2</sub>SO<sub>3</sub>); **HRMS**:  $m/z$  (ESI<sup>+</sup>) calc. for C<sub>33</sub>H<sub>43</sub>N<sub>5</sub>O<sub>4</sub>S [M+H]<sup>+</sup>: 606.3109; Obs.: 606.3122;  $\nu_{\text{max}}$ : (FT-ATR)/cm<sup>-1</sup>: 3294, 2923, 2853, 1678, 1495, 1458, 1385, 1338, 1144, 1105, 1038, 926, 751.

#### 4. Synthesis of control substrates for FRET studies

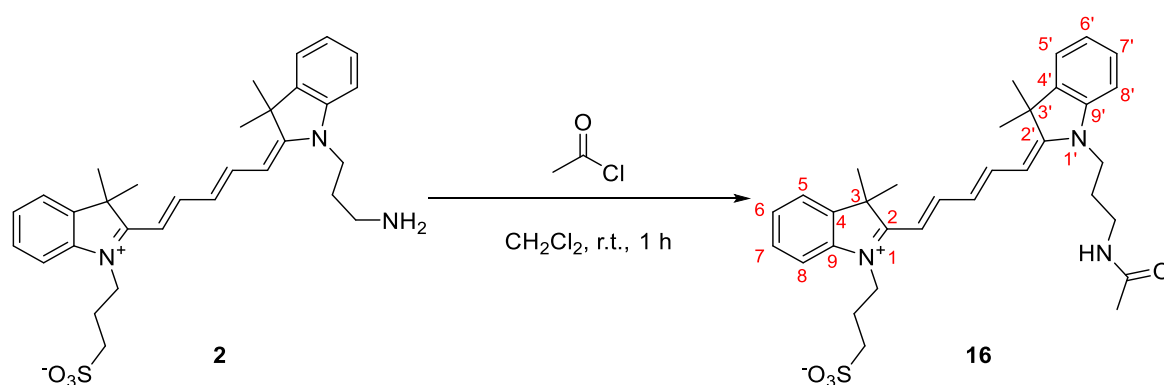

Acetyl chloride (7  $\mu$ L, 99  $\mu$ mol) was added to a solution of **2** (10 mg, 19  $\mu$ mol) in dichloromethane (3 mL) and stirred at r.t. for 1 h. The reaction mixture was then concentrated under reduced pressure and the residue was purified via flash column chromatography on silica gel, eluting with MeOH:CH<sub>2</sub>Cl<sub>2</sub> (5:95). Fractions containing

the product were concentrated under reduced pressure to provide a blue oil (7 mg, 12  $\mu$ mol, 64%).

**R<sub>f</sub>**: 0.29 (5:95, MeOH:CH<sub>2</sub>Cl<sub>2</sub>, visible light active); **<sup>1</sup>H NMR** (400 MHz, CD<sub>3</sub>OD)  $\delta$  = 8.30 (dd,  $J_1 = J_2 = 13.1$  Hz, 2H, CHCHCN), 7.53-7.47 (m, 2H, H<sub>5</sub>, H<sub>5'</sub>), 7.45-7.41 (m, 3H, H<sub>7</sub>, H<sub>7'</sub>, H<sub>8</sub>/H<sub>8'</sub>), 7.31-7.25 (m, 3H, H<sub>6</sub>, H<sub>6'</sub>, H<sub>8</sub>/H<sub>8'</sub>), 6.68 (dd,  $J_1 = J_2 = 13.1$  Hz, 1H, CHCHCHCN), 6.47 (d,  $J = 13.1$  Hz, 1H, CHCN), 6.30 (d,  $J = 13.1$  Hz, 1H, CHCN), 4.37 (t,  $J = 7.5$  Hz, 2H, CH<sub>2</sub>CH<sub>2</sub>CH<sub>2</sub>SO<sub>3</sub>), 4.15 (t,  $J = 7.5$  Hz, 2H, CH<sub>2</sub>CH<sub>2</sub>CH<sub>2</sub>NH<sub>2</sub>), 3.34-3.30 (m, 2H, CH<sub>2</sub>NH<sub>2</sub>), 3.01 (t,  $J = 7.5$  Hz, 2H, CH<sub>2</sub>SO<sub>3</sub>), 2.27 (tt,  $J_1 = J_2 = 7.5$  Hz, 2H, CH<sub>2</sub>CH<sub>2</sub>SO<sub>3</sub>), 2.03 (tt,  $J_1 = J_2 = 7.5$  Hz, 2H, CH<sub>2</sub>CH<sub>2</sub>NH<sub>2</sub>), 1.99 (s, 3H, COCH<sub>3</sub>), 1.74 (s, 12H, CyCH<sub>3</sub>); **<sup>13</sup>C NMR** (101 MHz, CD<sub>3</sub>OD)  $\delta$  = 173.5 (C<sub>2</sub>, C<sub>2'</sub>), 172.9 (C<sub>3</sub>/C<sub>3'</sub>), 172.2 (C<sub>3</sub>/C<sub>3'</sub>), 164.7 (CON), 154.6 (CHCHCN), 154.1 (CHCHCN), 142.1 (C<sub>9</sub>, C<sub>9'</sub>), 141.3 (C<sub>4</sub>, C<sub>4'</sub>), 128.4 (C<sub>7</sub>, C<sub>7'</sub>), 125.8 (CHCHCHCN), 125.0 (C<sub>6</sub>, C<sub>6'</sub>), 122.0 (C<sub>5</sub>, C<sub>5'</sub>), 110.6 (C<sub>8</sub>, C<sub>8'</sub>), 103.1 (CHCN), 102.8 (CHCN), 49.2 (CH<sub>2</sub>SO<sub>3</sub>), 46.5 (CH<sub>2</sub>CH<sub>2</sub>CH<sub>2</sub>SO<sub>3</sub>), 41.9 (CH<sub>2</sub>CH<sub>2</sub>CH<sub>2</sub>NH<sub>2</sub>), 36.5 (CH<sub>2</sub>NH), 26.7 (CyCH<sub>3</sub>), 26.4 (CH<sub>3</sub>), 26.5 (CH<sub>2</sub>CH<sub>2</sub>NH<sub>2</sub>), 22.7 (CH<sub>2</sub>CH<sub>2</sub>SO<sub>3</sub>); **HRMS**:  $m/z$  (ESI<sup>+</sup>) calc. for C<sub>33</sub>H<sub>41</sub>N<sub>3</sub>O<sub>4</sub>S [M+H]<sup>+</sup>: 576.2891; Obs.: 576,2905;  $\nu_{\text{max}}$ : (FT-ATR)/cm<sup>-1</sup>: 3288, 3054, 2921, 2850, 1657, 1492, 1452, 1377, 1337, 1217, 1137, 1099, 1016, 926, 796, 708, 593.

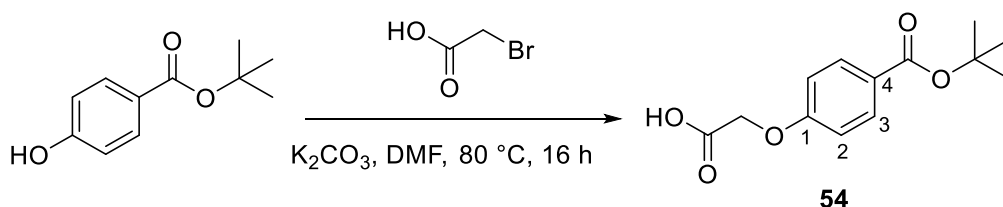

A mixture of *tert*-butyl 4-hydroxybenzoate (1.00 g, 5.15 mmol), bromoacetic acid (1.08 g, 7.73 mmol) and potassium carbonate (1.92 g, 13.9 mmol) in dimethylformamide (10 mL) was stirred for 16 h at 80 °C. The mixture was then cooled to r.t. and diluted with water (100 mL). The aqueous was extracted with ethyl acetate (3  $\times$  70 mL) and the combined organic layers washed with brine (2  $\times$  70 mL), dried with MgSO<sub>4</sub>, filtered and concentrated under reduced pressure. The residue was purified via flash column chromatography on silica gel eluting with EtOAc:Petrol (15:85). Fractions containing the product were concentrated under reduced pressure to provide a white foam (77 mg, 0.31 mmol, 6%).

**R<sub>f</sub>**: 0.22 (15:85, EtOAc:petrol, UV active); **<sup>1</sup>H NMR** (400 MHz, CD<sub>3</sub>OD)  $\delta$  = 7.82 (d,  $J = 8.4$  Hz, 2H, PhH<sub>3</sub>), 6.80 (d,  $J = 8.4$  Hz, 2H, PhH<sub>2</sub>), 4.45 (s, 2H, CH<sub>2</sub>), 1.52 (s, 9H, <sup>t</sup>Bu);

**<sup>13</sup>C NMR** (101 MHz, CD<sub>3</sub>OD)  $\delta$  = 166.1 (COOH) 165.5 (COOC), 160.8 (PhC<sub>4</sub>), 131.7 (PhC<sub>3</sub>), 131.5 (PhC<sub>3</sub>), 125.5 (PhC<sub>1</sub>), 115.2 (PhC<sub>2</sub>), 114.2 (PhC<sub>2</sub>), 81.0 (CCH<sub>3</sub>), 65.1 (CH<sub>2</sub>), 28.3 (<sup>t</sup>Bu); **HRMS**: *m/z* (ESI<sup>+</sup>) calc. for C<sub>13</sub>H<sub>16</sub>O<sub>5</sub> [M+H]<sup>+</sup>: 253.1080; Obs.: 253.1080;  **$\nu_{\text{max}}$** : (FT-ATR)/cm<sup>-1</sup>: 3296, 2979, 2932, 1674, 1605, 1589, 1514, 1442, 1317, 1280, 1226, 1154, 1102, 849, 774, 700, 618, 520, 499; **m.p.**: 185-204 °C.

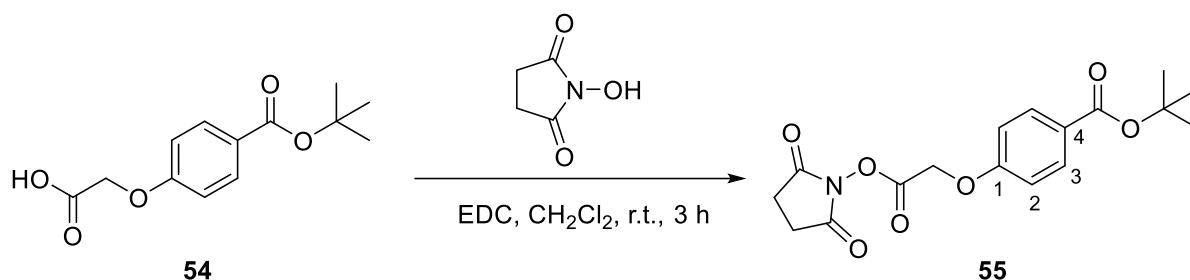

A mixture of **54** (77 mg, 0.31 mmol), *N*-hydroxysuccinimide (53 mg, 0.46 mmol) and *N*-(3-dimethylaminopropyl)-*N'*-ethylcarbodiimide hydrochloride (88 mg, 0.46 mmol) in dichloromethane (3 mL) was stirred at r.t. for 3 h. Dichloromethane (20 mL) was then added and the organics were washed with water (2 × 30 mL) and brine (30 mL), dried with MgSO<sub>4</sub>, filtered, and concentrated under reduced pressure to give a colourless oil (61 mg, 0.18 mmol, 56%).

**R<sub>f</sub>**: 0.31 (1:9, EtOAc:petrol, UV active); **<sup>1</sup>H NMR** (400 MHz, CD<sub>3</sub>OD)  $\delta$  = 7.95-7.91 (m, 2H, PhH<sub>3</sub>), 6.94-6.90 (m, 2H, PhH<sub>2</sub>), 4.99 (s, 2H, CH<sub>2</sub>O), 2.82 (s, 4H, OSu), 1.54 (s, 9H, <sup>t</sup>Bu); **<sup>13</sup>C NMR** (101 MHz, CD<sub>3</sub>OD)  $\delta$  = 169.3 (CON), 168.8 (CON), 165.3 (COO<sup>t</sup>Bu), 164.3 (COON), 160.4, (PhC<sub>4</sub>), 131.6 (PhC<sub>3</sub>), 131.4 (PhC<sub>3</sub>), 126.3 (PhC<sub>1</sub>), 114.2, (PhC<sub>2</sub>), 114.2 (PhC<sub>2</sub>), 80.8 (CCH<sub>3</sub>), 65.2 (CH<sub>2</sub>O), 28.3 (<sup>t</sup>Bu), 25.6 (OSu), 25.5 (OSu); **HRMS**: *m/z* (ESI<sup>+</sup>) calc. for C<sub>17</sub>H<sub>19</sub>NO<sub>7</sub> [M+Na]<sup>+</sup>: 372.1054; Obs.: 372.1054.

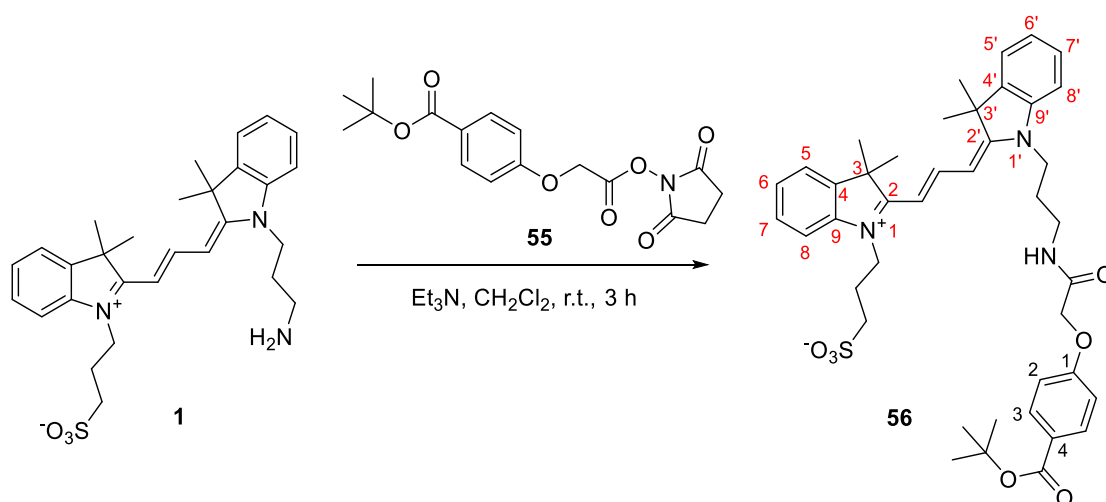

A mixture of **1** (67 mg, 0.13 mmol), **55** (60 mg, 0.17 mmol) and triethylamine (91  $\mu$ L, 0.66 mmol) in dichloromethane (3 mL) was stirred for 3 h. The reaction mixture was then concentrated under reduced pressure, and the residue purified via flash column chromatography on silica gel eluting with MeOH:CH<sub>2</sub>Cl<sub>2</sub> (5:95). Fractions containing the product were concentrated under reduced pressure to provide a pink oil (29 mg, 39  $\mu$ mol, 30%).

**R<sub>f</sub>**: 0.36 (5:95, MeOH:CH<sub>2</sub>Cl<sub>2</sub>, visible light active); **<sup>1</sup>H NMR** (400 MHz, CD<sub>3</sub>OD)  $\delta$  = 8.51 (dd,  $J_1 = J_2 = 13.5$  Hz, 1H, CHCHCN), 7.92-7.84 (m, 2H, PhH<sub>3</sub>), 7.53-7.49 (m, 2H, H<sub>5</sub>, H<sub>5'</sub>), 7.46-7.34 (m, 3H, H<sub>7</sub>, H<sub>7'</sub>, H<sub>8</sub>/H<sub>8'</sub>), 7.34-7.19 (m, 3H, H<sub>6</sub>, H<sub>6'</sub>, H<sub>8</sub>/H<sub>8'</sub>), 7.09-7.00 (m, 2H, PhH<sub>2</sub>), 6.60 (dd,  $J = 13.5, 3.6$  Hz, 1H, CHCN), 6.44 (dd,  $J = 13.5, 3.6$  Hz, 1H, CHCN), 4.61 (s, 2H, CH<sub>2</sub>O), 4.30 (t,  $J = 7.2$  Hz, 2H, CH<sub>2</sub>CH<sub>2</sub>CH<sub>2</sub>SO<sub>3</sub>), 4.14 (t,  $J = 7.4$  Hz, 2H, CH<sub>2</sub>CH<sub>2</sub>CH<sub>2</sub>NH), 3.45 (t,  $J = 7.0$  Hz, 2H, CH<sub>2</sub>NH), 2.96 (t,  $J = 7.2$  Hz, 2H, CH<sub>2</sub>SO<sub>3</sub>), 2.21 (tt,  $J_1 = J_2 = 7.2$  Hz, 2H, CH<sub>2</sub>CH<sub>2</sub>SO<sub>3</sub>), 2.06 (tt,  $J_1 = J_2 = 7.4$  Hz, 2H, CH<sub>2</sub>CH<sub>2</sub>NH), 1.74 (s, 12H, CyCH<sub>3</sub>), 1.52 (s, 9H, <sup>t</sup>Bu); **<sup>13</sup>C NMR** (101 MHz, CD<sub>3</sub>OD)  $\delta$  = 176.3 (CONH), 176.1 (CHCHCN), 171.0 (C<sub>2</sub>, C<sub>2'</sub>), 165.4 (COO<sup>t</sup>Bu), 162.2 (PhC<sub>4</sub>), 152.4 (C<sub>3</sub>, C<sub>3'</sub>), 143.4 (C<sub>9</sub>, C<sub>9'</sub>), 142.6 (C<sub>4</sub>, C<sub>4'</sub>), 132.6 (PhC<sub>3</sub>), 130.2 (C<sub>7</sub>/C<sub>7'</sub>), 130.1 (C<sub>7</sub>/C<sub>7'</sub>), 127.1 (C<sub>6</sub>/C<sub>6'</sub>), 126.9 (C<sub>6</sub>/C<sub>6'</sub>), 125.5 (PhC<sub>1</sub>), 123.8 (C<sub>5</sub>/C<sub>5'</sub>), 123.6 (C<sub>5</sub>/C<sub>5'</sub>), 115.4 (PhC<sub>2</sub>), 112.6 (C<sub>8</sub>/C<sub>8'</sub>), 112.4 (C<sub>8</sub>/C<sub>8'</sub>), 104.5 (CHCN), 104.2 (CHCN), 81.0 (CCH<sub>3</sub>), 68.4 (CH<sub>2</sub>CO), 50.8 (CH<sub>2</sub>SO<sub>3</sub>), 44.1 (CH<sub>2</sub>CH<sub>2</sub>CH<sub>2</sub>SO<sub>3</sub>), 43.1 (CH<sub>2</sub>CH<sub>2</sub>CH<sub>2</sub>NH), 37.7 (CH<sub>2</sub>NH), 28.5 (CyCH<sub>3</sub>), 28.3 (<sup>t</sup>Bu), 28.3 (CH<sub>2</sub>CH<sub>2</sub>NH<sub>2</sub>), 24.3 (CH<sub>2</sub>CH<sub>2</sub>SO<sub>3</sub>); **HRMS**:  $m/z$  (ESI<sup>+</sup>) calc. for C<sub>42</sub>H<sub>50</sub>N<sub>3</sub>O<sub>7</sub>S [M+H]<sup>+</sup>: 742.3530; Obs.: 742.3530;  **$\nu_{\text{max}}$** : (FT-ATR)/cm<sup>-1</sup>: 3410, 2979, 2934, 1752, 1686, 1589, 1450, 1339, 1211, 1145, 1076, 964, 850, 734, 674.

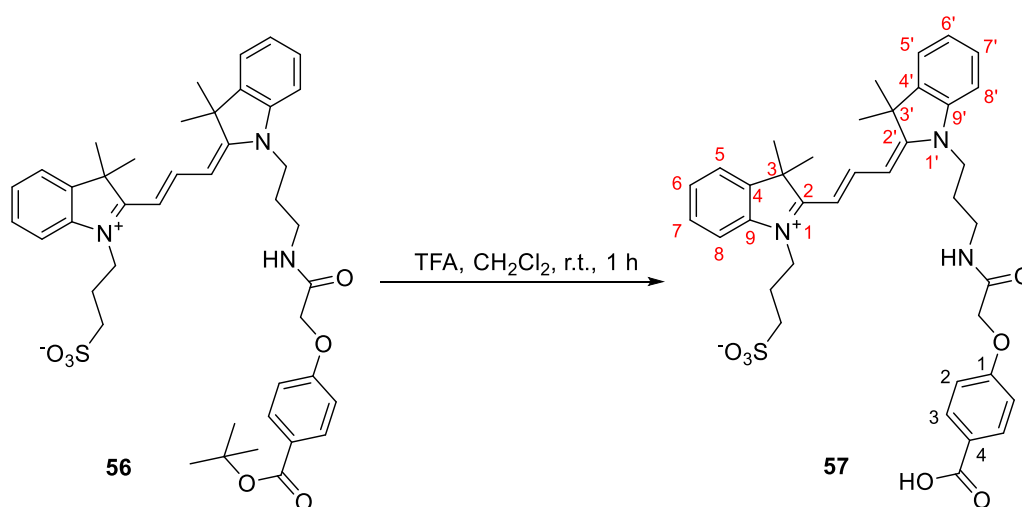

Trifluoroacetic acid (1 mL) was added dropwise to a stirred solution of **56** (15 mg, 20  $\mu$ mol) in dichloromethane (4 mL) and the mixture stirred at r.t. for 1 h. The reaction was then added dropwise to diethyl ether (200 mL). The precipitate was collected by filtration, washed with diethyl ether (30 mL), and dried in air. The solid was redissolved in methanol (10 mL) and concentrated under reduced pressure to afford a pink oil (10 mg, 15  $\mu$ mol, 73%).

**R<sub>f</sub>**: 0.23 (1:9, MeOH:CH<sub>2</sub>Cl<sub>2</sub>, visible light active); **<sup>1</sup>H NMR** (400 MHz, CD<sub>3</sub>OD)  $\delta$  = 8.51 (dd,  $J$  = 13.5, 4.3 Hz, 1H, CHCHCN), 7.95 (d,  $J$  = 8.4 Hz, 2H, PhH<sub>3</sub>), 7.54-7.48 (m, 2H, H<sub>5</sub>, H<sub>5'</sub>), 7.45-7.34 (m, 3H, H<sub>7</sub>, H<sub>7'</sub>, H<sub>8</sub>/H<sub>8'</sub>), 7.30-7.22 (m, 3H, H<sub>6</sub>, H<sub>6'</sub>, H<sub>8</sub>/H<sub>8'</sub>), 7.06 (d,  $J$  = 8.4 Hz, 2H, PhH<sub>2</sub>), 6.58 (dd,  $J$  = 13.5, 4.3 Hz 1H, CHCN), 6.41 (dd,  $J$  = 13.5, 4.3 Hz, 1H, CHCN), 4.62 (s, 2H, CH<sub>2</sub>O), 4.37-4.26 (m, 2H, CH<sub>2</sub>CH<sub>2</sub>CH<sub>2</sub>SO<sub>3</sub>), 4.15-4.11 (m, 2H, CH<sub>2</sub>CH<sub>2</sub>CH<sub>2</sub>NH), 3.52-3.39 (m, 2H, CH<sub>2</sub>NH), 3.01-2.94 (m, 2H, CH<sub>2</sub>SO<sub>3</sub>), 2.25-2.31 (m, 2H, CH<sub>2</sub>CH<sub>2</sub>SO<sub>3</sub>), 2.09-2.03 (m, 2H, CH<sub>2</sub>CH<sub>2</sub>NH), 1.73 (s, 12H, CyCH<sub>3</sub>); **<sup>13</sup>C NMR** (101 MHz, CD<sub>3</sub>OD)  $\delta$  = 176.4 (CONH), 176.1 (CHCHCN), 171.1 (C<sub>2</sub>, C<sub>2'</sub>), 169.5 (COOH), 163.1 (PhC<sub>4</sub>), 152.4 (C<sub>3</sub>, C<sub>3'</sub>), 143.4 (C<sub>9</sub>/C<sub>9'</sub>), 143.3 (C<sub>9</sub>/C<sub>9'</sub>), 142.4 (C<sub>4</sub>, C<sub>4'</sub>), 133.1 (PhC<sub>3</sub>), 130.2 (C<sub>7</sub>/C<sub>7'</sub>), 130.1 (C<sub>7</sub>/C<sub>7'</sub>), 127.0 (C<sub>6</sub>/C<sub>6'</sub>), 126.9 (C<sub>6</sub>/C<sub>6'</sub>), 125.4 (PhC<sub>1</sub>), 123.7 (C<sub>5</sub>/C<sub>5'</sub>), 123.6 (C<sub>5</sub>/C<sub>5'</sub>), 115.8 (PhC<sub>2</sub>), 112.7 (C<sub>8</sub>/C<sub>8'</sub>), 112.4 (C<sub>8</sub>/C<sub>8'</sub>), 104.5 (CHCN), 104.2 (CHCN), 68.4 (CH<sub>2</sub>CO), 50.8 (CH<sub>2</sub>SO<sub>3</sub>), 44.1 (CH<sub>2</sub>CH<sub>2</sub>CH<sub>2</sub>SO<sub>3</sub>), 43.1 (CH<sub>2</sub>CH<sub>2</sub>CH<sub>2</sub>NH), 37.7 (CH<sub>2</sub>NH), 28.5 (CyCH<sub>3</sub>), 28.3 (CH<sub>2</sub>CH<sub>2</sub>NH<sub>2</sub>), 24.3 (CH<sub>2</sub>CH<sub>2</sub>SO<sub>3</sub>); **HRMS**:  $m/z$  (ESI<sup>+</sup>) calc. for C<sub>38</sub>H<sub>42</sub>N<sub>3</sub>O<sub>7</sub>S [M+H]<sup>+</sup>: 686.2917; Obs.: 686.2917;  $\nu_{\text{max}}$ ; (FT-ATR)/cm<sup>-1</sup>: 2979, 2929, 1709, 1558, 1457, 1430, 1275, 1153, 1114, 928, 750.

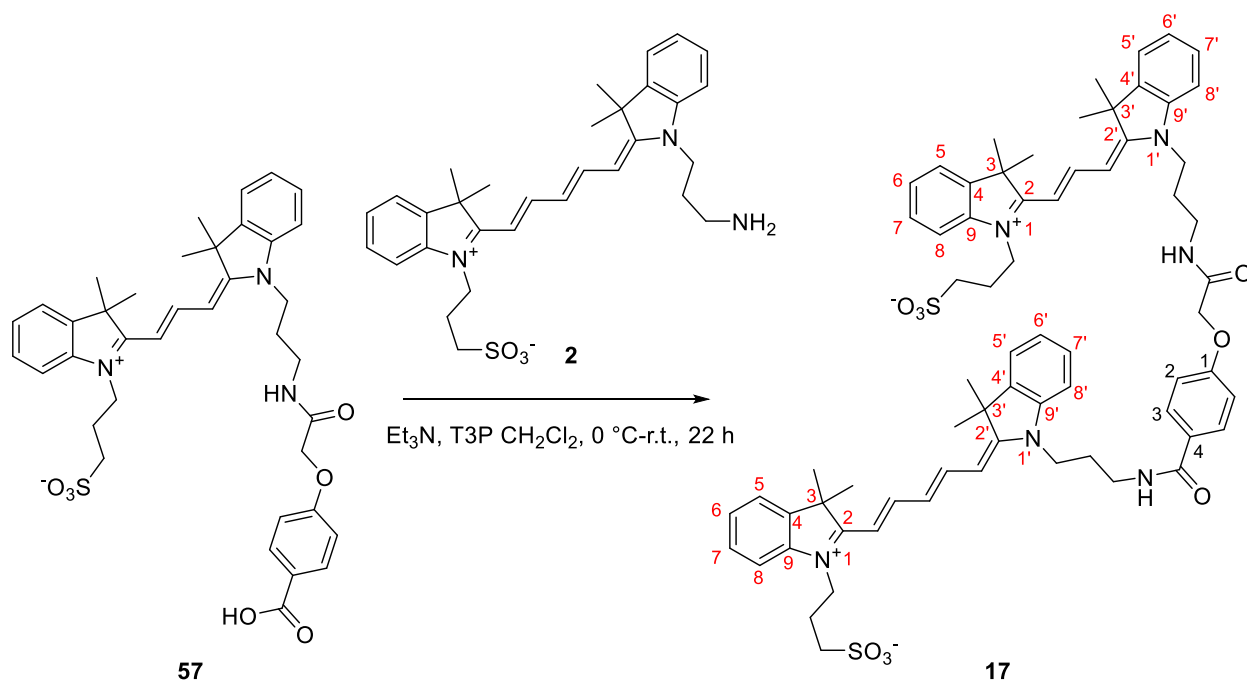

To a solution of **57** (10 mg, 15  $\mu\text{mol}$ ), **2** (12 mg, 22  $\mu\text{mol}$ ), and triethylamine (10  $\mu\text{L}$ , 73  $\mu\text{mol}$ ) in dichloromethane (5 mL), was added propylphosphonic anhydride solution (50% w/w in EtOAc, 13  $\mu\text{L}$ , 37  $\mu\text{mol}$ ) at 0 °C and the mixture stirred at r.t. for 16 h. The reaction was then concentrated under reduced pressure. The residue was purified via flash column chromatography on silica gel eluting with MeOH: $\text{CH}_2\text{Cl}_2$  (5:95). Fractions containing the product were concentrated under reduced pressure to provide a purple oil (12 mg, 10  $\mu\text{mol}$ , 10, 66%).

**R<sub>f</sub>**: 0.32 (5:95, MeOH: $\text{CH}_2\text{Cl}_2$ , visible light active); **<sup>1</sup>H NMR** (400 MHz,  $\text{CD}_3\text{OD}$ )  $\delta$  = 8.50 (dd,  $J_1 = J_2 = 13.5$  Hz, 1H, Cy3-CH<sub>2</sub>CHCN), 8.22-8.16 (m, 2H, CH<sub>2</sub>CHCN), 7.89-7.84 (m, 2H, PhH<sub>3</sub>), 7.52-7.48 (m, 2H, H<sub>7</sub>, H<sub>7'</sub>), 7.48-7.44 (m, 2H, H<sub>7</sub>, H<sub>7'</sub>), 7.42-7.35 (m, 6H, H<sub>5</sub>, H<sub>5'</sub>, H<sub>5</sub>, H<sub>5'</sub>, H<sub>8</sub>, H<sub>8'</sub>), 7.30-7.21 (m, 6H, H<sub>8</sub>, H<sub>8'</sub>, 2 × H<sub>6</sub>, 2 × H<sub>6'</sub>), 7.19-7.15 (m, 2H, PhH<sub>2</sub>), 6.57 (d,  $J = 13.5$  Hz, 1H, Cy3-CH<sub>2</sub>CN), 6.46 (d,  $J = 13.5$  Hz, 1H, Cy3-CH<sub>2</sub>CN), 6.40 (t,  $J = 12.5$  Hz, 1H, CH<sub>2</sub>CHCHCN), 6.31 (d,  $J = 13.5$  Hz, 1H, Cy5-CH<sub>2</sub>CN), 6.18 (d,  $J = 13.5$  Hz, 1H, Cy5-CH<sub>2</sub>CN), 4.65 (s, 2H, CH<sub>2</sub>O), 4.36-4.26 (m, 4H, CH<sub>2</sub>CH<sub>2</sub>CH<sub>2</sub>SO<sub>3</sub>), 4.21-4.11 (m, 4H, CH<sub>2</sub>CH<sub>2</sub>CH<sub>2</sub>NH), 3.44-3.50 (m, 4H, CH<sub>2</sub>NH), 3.01-2.95 (m, 4H, CH<sub>2</sub>SO<sub>3</sub>), 2.19-2.11 (m, 4H, CH<sub>2</sub>CH<sub>2</sub>SO<sub>3</sub>), 2.16-2.04 (m, 4H, CH<sub>2</sub>CH<sub>2</sub>NH), 1.80-1.56 (m, 24H, CyCH<sub>3</sub>); **<sup>13</sup>C NMR** (101 MHz,  $\text{CD}_3\text{OD}$ )  $\delta$  = 176.3 (Cy3-C<sub>2</sub>/C<sub>2'</sub>), 176.1 (Cy3-C<sub>2</sub>/C<sub>2'</sub>), 174.9 (Cy3-CHCHCN), 174.6 (Cy3-C<sub>3</sub>/C<sub>3'</sub>), 174.4 (Cy3-C<sub>3</sub>/C<sub>3'</sub>), 171.1 (Cy5-C<sub>2</sub>, C<sub>2'</sub>), 169.8 (Cy3-C<sub>2</sub>ON), 162.1, 155.8, 152.4, 143.6 (C<sub>9</sub>, C<sub>9'</sub>),

143.3 (C9/C9'), 142.8 (C9/C9'), 142.7 (C4/C4'), 142.4 (C4/C4'), 130.6 (PhC2), 130.2 (PhC1), 130.0 (PhthC3), 129.9 (C7/C7'), 128.8 (C7/C7'), 126.9 (C7/C7'), 126.9 (C7/C7'), 126.4 (C6, C6'), 126.4 (CHCHCHCN), 124.2 (C6/C6'), 123.7 (C6/C6'), 123.6 (PhthC3), 123.6 (C5, C5'), 116.1 (C5, C5'), 112.7 (C8/C8'), 112.5 (C8/C8'), 112.3 (C8/C8'), 112.1 (C8/C8'), 104.4 (CHCN), 104.2 (CHCN), 71.6 (CH2O), 50.1 (CH2SO<sub>3</sub><sup>-</sup>), 48.1 (CH2SO<sub>3</sub><sup>-</sup>), 44.1 (CH2CH2CH2SO<sub>3</sub><sup>-</sup>), 43.1 (CH2CH2CH2SO<sub>3</sub><sup>-</sup>), 42.8 (CH2CH2CH2NCO), 38.3 (CH2CH2CH2NCO), 37.7 (CH2NCO), 28.5 (CyCH3), 28.4 (CyCH3), 28.2 (CH2CH2NCO), 28.1 (CH2CH2NCO), 24.8 (CH2CH2SO<sub>3</sub><sup>-</sup>), 24.4 (CH2CH2SO<sub>3</sub><sup>-</sup>); **HRMS**: *m/z* (ESI<sup>+</sup>) calc. for C<sub>69</sub>H<sub>80</sub>N<sub>6</sub>O<sub>9</sub>S<sub>2</sub> [M+Na]<sup>+</sup>: 1223.5320; Obs.: 1223.5322; **v**<sub>max</sub>: (FT-ATR)/cm<sup>-1</sup>: 3358, 2922, 2852, 1659, 1633, 1556, 1487, 1429, 1454, 1377, 1140, 1035, 925, 797, 750, 708, 552.

## 5. Synthesis of Cy3 negative controls

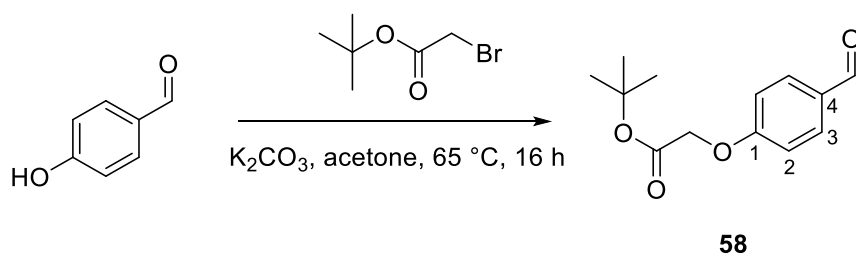

A mixture of *tert*-butyl bromoacetate (1.20 mL, 8.20 mmol), 4-hydroxybenzaldehyde (1.00 g, 8.20 mmol), and potassium carbonate (1.92 g, 14.0 mmol) in acetone (15 mL) was stirred at 65 °C for 16 h. The mixture was then cooled to r.t. and diluted with water (100 mL). The aqueous layer was extracted with ethyl acetate (3 × 70 mL), and the combined organics washed with brine (2 × 70 mL), dried with MgSO<sub>4</sub>, filtered, and concentrated under reduced pressure. The residue was purified via flash column chromatography on silica gel, eluting with EtOAc:petrol (15:85). Fractions containing the product were concentrated under reduced pressure to provide a colourless oil (1.43 g, 6.06 mmol, 74%). Data were consistent with those previously reported.<sup>9</sup>

**R**<sub>f</sub>: 0.26 (15:85, EtOAc:petrol, UV active); **<sup>1</sup>H NMR** (400 MHz, CDCl<sub>3</sub>) δ = 9.91 (s, 1H, CHO), 7.86 (d, *J* = 8.0 Hz, 2H, PhH3), 7.04 (d, *J* = 8.0 Hz, 2H, PhH2), 4.77 (s, 2H, CH2), 0.06 (s, 9H, <sup>*t*</sup>Bu); **HRMS**: *m/z* (ESI<sup>+</sup>) calc. for C<sub>13</sub>H<sub>16</sub>O<sub>4</sub> [M+H]<sup>+</sup>: 237.1121; Obs.: 237.1119; **v**<sub>max</sub>: (FT-ATR)/cm<sup>-1</sup>: 2980, 1748, 1691, 1598, 1509, 1368, 1308, 1216, 1148, 1071, 944, 831, 746, 608, 513; **m.p.**: 191-194 °C.

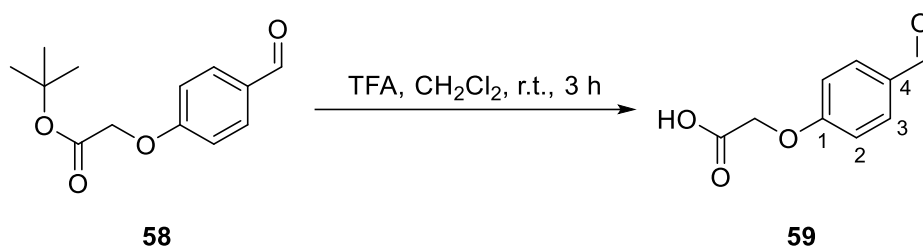

Trifluoroacetic acid (10 mL) was added dropwise to a stirred solution of **58** (1.43 g, 6.06 mmol) in dichloromethane (10 mL) and the mixture was stirred at r.t. for 1 h. The reaction mixture was then concentrated under reduced pressure and the residue was azeotroped with dichloromethane (3 × 10 mL) to afford a yellow powder (1.08 g, 6.00 mmol, 99%). Data were consistent with those previously reported.<sup>10</sup>

**R<sub>f</sub>**: 0.28 (2:8, EtOAc:petrol, UV active); **<sup>1</sup>H NMR** (400 MHz, DMSO-*d*<sub>6</sub>) δ = 13.13 (s, 1H, OH), 9.83 (s, 1H, CHO), 7.82 (d, *J* = 7.9 Hz, 2H, PhH<sub>3</sub>), 7.06 (d, *J* = 7.9 Hz, 2H, PhH<sub>2</sub>), 4.79 (s, 2H, CH<sub>2</sub>); **HRMS**: *m/z* (ESI<sup>+</sup>) calc. for C<sub>9</sub>H<sub>8</sub>O<sub>4</sub> [M-H]<sup>-</sup>: 179.0350; Obs.: 179.0351; **ν<sub>max</sub>**: (FT-ATR)/cm<sup>-1</sup>: 3660, 2982, 1598, 1385, 1259, 1166, 1074, 954, 750; **m.p.**: 191-194 °C;

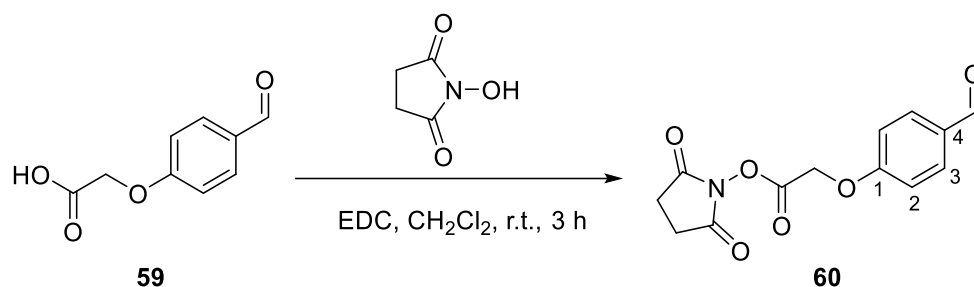

A reaction mixture of **59** (100 mg, 0.56 mmol), *N*-hydroxysuccinimide (96 mg, 0.83 mmol), and *N*-(3-dimethylaminopropyl)-*N'*-ethylcarbodiimide hydrochloride (150 mg, 0.83 mmol) in dichloromethane (2 mL) was stirred at r.t. for 2 h. Dichloromethane (20 mL) was then added and the organic layer was washed with water (2 × 30 mL) and brine (30 mL), dried with MgSO<sub>4</sub>, filtered, and concentrated under reduced pressure to give a pink foam which was used in the subsequent step without further analysis or purification (72 mg, 0.26 mmol, 46%).

**R<sub>f</sub>**: 0.29 (1:9, EtOAc:petrol, UV active); **<sup>1</sup>H NMR** (400 MHz, CD<sub>3</sub>OD for aldehyde) δ = 9.90 (s, 1H, CHO), 7.87 (d, *J* = 8.0 Hz, 2H, PhH<sub>3</sub>), 7.05 (d, *J* = 8.0 Hz, 2H, PhH<sub>2</sub>), 6.08 (s, CH<sub>2</sub>O), 2.87 (s, 4H, OSu); **HRMS**: *m/z* (ESI<sup>+</sup>) calc. C<sub>13</sub>H<sub>11</sub>NO<sub>6</sub> [M+H]<sup>+</sup>: 278.0652; Obs.: 278.0652; **ν<sub>max</sub>**: (FT-ATR)/cm<sup>-1</sup>: 2978, 1824, 1785, 1737, 1600, 1508, 1427, 1207, 1165, 1074, 834, 646; **m.p.**: 142-146 °C.

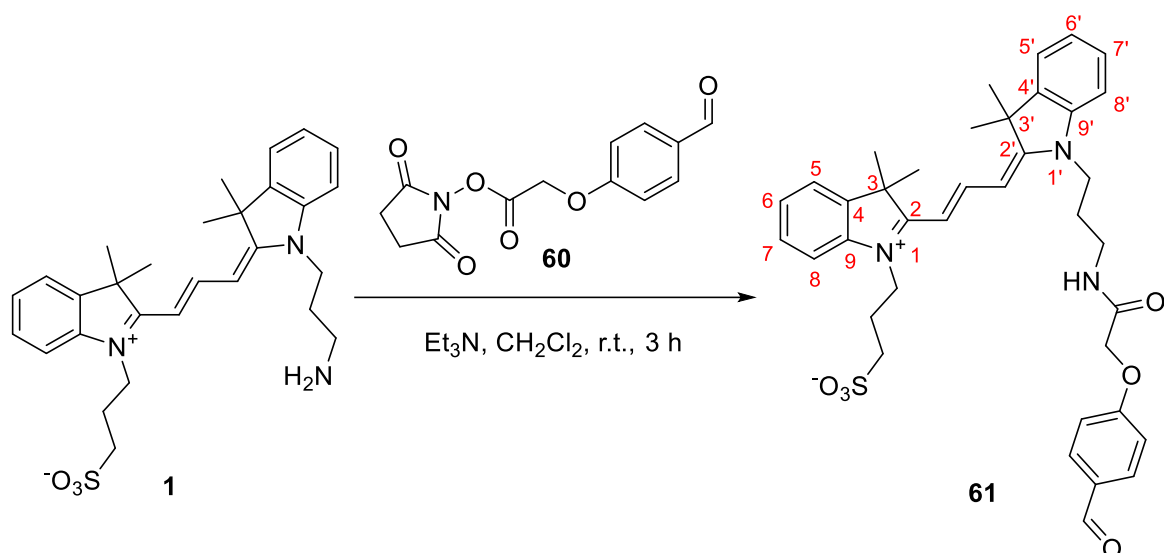

A reaction mixture of **1** (40 mg, 79  $\mu\text{mol}$ ), **60** (22 mg, 79  $\mu\text{mol}$ ), and triethylamine (42  $\mu\text{L}$ , 0.395  $\mu\text{mol}$ ) in dichloromethane (2 mL) was stirred at r.t. for 3 h. The reaction mixture was then concentrated under reduced pressure. The residue was purified via flash column chromatography on silica gel, eluting with MeOH:CH<sub>2</sub>Cl<sub>2</sub> (5:95). Fractions containing the product were concentrated under reduced pressure to provide a pink oil (18 mg, 27  $\mu\text{mol}$ , 45%).

**R<sub>f</sub>**: 0.17 (5:95, MeOH:CH<sub>2</sub>Cl<sub>2</sub>, visible light active); **<sup>1</sup>H NMR** (400 MHz, CD<sub>3</sub>OD; in this solvent, a mix of aldehyde and methanol hemi-acetal were formed. Data is provided for the aldehyde form)  $\delta$  = 9.82 (s, 1H, CHO), 8.53 (dd,  $J_1 = J_2 = 13.4$  Hz, 1H, CHCHCN), 7.86 (d,  $J = 8.5$  Hz, 2H, PhH<sub>3</sub>), 7.54-7.50 (m, 2H, H<sub>5</sub>, H<sub>5'</sub>), 7.45-7.33 (m, 3H, H<sub>7</sub>, H<sub>7'</sub>, H<sub>8</sub>/H<sub>8'</sub>), 7.31-7.25 (m, 3H, H<sub>8</sub>/H<sub>8'</sub>, H<sub>6</sub>, H<sub>6'</sub>), 7.17 (d,  $J = 8.5$  Hz, 2H, PhH<sub>2</sub>), 6.60 (d,  $J = 13.4$  Hz, 1H, CHCN), 6.44 (d,  $J = 13.4$  Hz, 1H, CHCN), 4.55 (s, 2H, CH<sub>2</sub>O), 4.32 (t,  $J = 7.1$  Hz, 2H, CH<sub>2</sub>CH<sub>2</sub>CH<sub>2</sub>SO<sub>3</sub>), 4.16 (t,  $J = 7.3$  Hz, 2H, CH<sub>2</sub>CH<sub>2</sub>CH<sub>2</sub>NH), 3.45 (t,  $J = 7.3$  Hz, 2H, CH<sub>2</sub>NH), 2.96 (t,  $J = 7.1$  Hz, 2H, CH<sub>2</sub>SO<sub>3</sub>), 2.27-2.21 (m, 2H, CH<sub>2</sub>CH<sub>2</sub>SO<sub>3</sub>), 2.11-2.07 (m, 2H, CH<sub>2</sub>CH<sub>2</sub>NH), 1.76 (s, 12H, CyCH<sub>3</sub>); **<sup>13</sup>C NMR** (101 MHz, CD<sub>3</sub>OD)  $\delta$  = 192.8 (CHO), 176.3 (CONH), 176.0 (PhC<sub>1</sub>), 175.9 (CHCHCN), 171.4 (C<sub>2</sub>, C<sub>2'</sub>), 159.3 (PhC<sub>4</sub>), 152.3 (C<sub>3</sub>, C<sub>3'</sub>), 143.2 (C<sub>9</sub>, C<sub>9'</sub>), 142.2 (C<sub>4</sub>, C<sub>4'</sub>), 133.1 (PhC<sub>3</sub>), 130.1 (PhC<sub>3</sub>), 129.3 (C<sub>7</sub>, C<sub>7'</sub>), 126.8 (C<sub>6</sub>, C<sub>6'</sub>), 123.5 (C<sub>5</sub>, C<sub>5'</sub>), 116.4 (PhC<sub>2</sub>), 115.5 (PhC<sub>2</sub>), 112.6 (C<sub>8</sub>/C<sub>8'</sub>), 112.3 (C<sub>8</sub>/C<sub>8'</sub>), 104.3 (CHCN), 104.1 (CHCN), 68.3 (CH<sub>2</sub>CO), 48.0 (CH<sub>2</sub>SO<sub>3</sub>), 44.0 (CH<sub>2</sub>CH<sub>2</sub>CH<sub>2</sub>SO<sub>3</sub>), 42.9 (CH<sub>2</sub>CH<sub>2</sub>CH<sub>2</sub>NH), 37.5 (CH<sub>2</sub>NH), 28.1 (CH<sub>2</sub>CH<sub>2</sub>NH<sub>2</sub>), 26.3 (CyCH<sub>3</sub>), 24.2 (CH<sub>2</sub>CH<sub>2</sub>SO<sub>3</sub>); **HRMS**:  $m/z$  (ESI<sup>+</sup>) calc. for C<sub>38</sub>H<sub>43</sub>N<sub>3</sub>O<sub>6</sub>S [M+H]<sup>+</sup> requires 670.2945,

found 670.2928;  $\nu_{\text{max}}$ : (FT-ATR)/ $\text{cm}^{-1}$ : 3378, 2925, 2854, 1713, 1600, 1557, 1457, 1430, 1373, 1218, 1153, 1115, 1037, 928, 795.

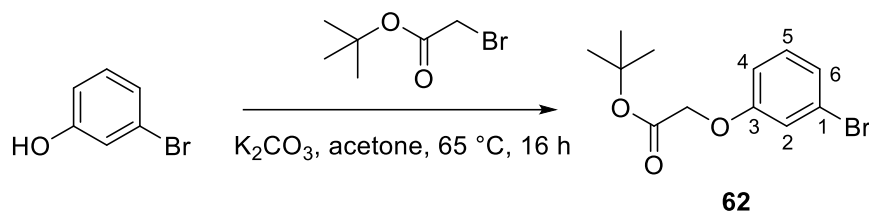

A mixture of 3-bromophenol (2.00 g, 11.6 mmol), *tert*-butyl bromoacetate (1.71 mL, 11.6 mmol), and potassium carbonate (2.71 g, 19.7 mmol) in acetone (20 mL) was stirred at 65 °C for 16 h. After cooling to r.t., water (100 mL) was added, and the aqueous was extracted with ethyl acetate (3 × 70 mL). The combined organics were washed with brine (2 × 70 mL), dried with  $\text{MgSO}_4$ , filtered and concentrated under reduced pressure. The residue was purified via flash column chromatography on silica gel eluting with EtOAc:petrol (1:9). Fractions containing the product were concentrated under reduced pressure to provide a red oil. (3.32 g, 11.5 mmol, 99%).

**R<sub>f</sub>**: 0.23 (1:9, EtOAc:petrol, UV active); **<sup>1</sup>H NMR** (400 MHz,  $\text{CDCl}_3$ )  $\delta$  = 7.14-7.10 (m, 1H, PhH<sub>5</sub>), 7.11-7.08 (m, 1H, PhH<sub>4</sub>), 7.03 (d,  $J$  = 2.1 Hz, 1H, PhH<sub>2</sub>), 6.81 (dd,  $J$  = 7.8, 2.1, 1H, PhH<sub>6</sub>), 4.48 (s, 2H, CH<sub>2</sub>O), 1.47 (s, 9H, *t*Bu); **<sup>13</sup>C NMR** (101 MHz,  $\text{CDCl}_3$ )  $\delta$  = 167.6 (C=O), 158.7 (PhC<sub>1</sub>), 130.7 (PhC<sub>5</sub>), 124.8 (PhC<sub>4</sub>), 122.9 (PhC<sub>3</sub>), 118.1 (PhC<sub>2</sub>), 113.7 (PhC<sub>6</sub>), 82.8 (CMe<sub>3</sub>), 65.8 (CH<sub>2</sub>O), 28.1 *t*Bu); **HRMS**:  $m/z$  (ESI<sup>+</sup>) calc. for  $\text{C}_{12}\text{H}_{15}^{79}\text{BrO}_3$  [M+Na]<sup>+</sup>: 309.0097; Obs.: 309.0096;  $\nu_{\text{max}}$ : (FT-ATR)/ $\text{cm}^{-1}$ : 2979, 2933, 1750, 1575, 1474, 1368, 1304, 1215, 1150, 1078, 834, 767.

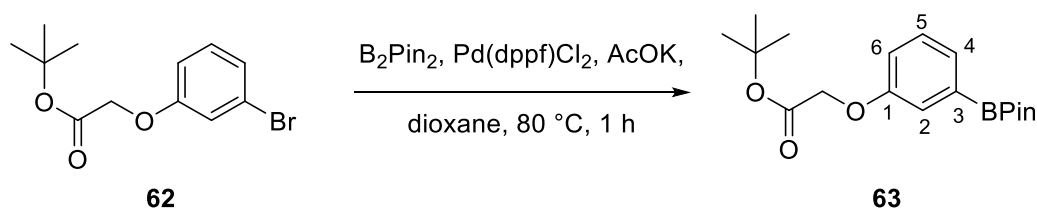

**62** (1.77 g, 6.17 mmol), bis(pinacolato)diboron (2.35 g, 9.25 mmol), 1,1'-bis(diphenylphosphino)ferrocene]dichloropalladium (II) (452 mg, 0.617 mmol) and potassium acetate (3.26 g, 33.3 mmol) were placed under a nitrogen atmosphere, and anhydrous dioxane (5 mL) was added. Nitrogen was bubbled through the reaction mixture for 10 min, which was then stirred at 80 °C for 1 h. After cooling to r.t., water (70 mL) was added, and the aqueous was extracted with ethyl acetate (3 × 50 mL).

The combined organics were washed with brine (2 × 50 mL), dried with MgSO<sub>4</sub>, filtered, and concentrated under reduced pressure. The residue was purified via flash column chromatography on silica gel eluting with EtOAc:petrol (15:85). Fractions containing the product were concentrated under reduced pressure to provide a white solid (1.76 g, 5.27 mmol, 88%).

**R<sub>f</sub>**: 0.22 (15:85, EtOAc:petrol, UV active); **<sup>1</sup>H NMR** (400 MHz, CDCl<sub>3</sub>) δ = 7.41 (dd, *J*<sub>1</sub> = *J*<sub>2</sub> = 8.2 Hz, 1H, PhH<sub>5</sub>), 7.29 (d, *J* = 8.2 Hz, 1H, PhH<sub>4</sub>), 7.27 (d, *J* = 2.8 Hz, 1H, PhH<sub>2</sub>), 7.03 (dd, *J* = 8.2, 2.8 Hz, 1H, PhH<sub>6</sub>), 4.53 (s, 2H, CH<sub>2</sub>O), 1.47 (s, 9H, <sup>*t*</sup>Bu), 1.31 (s, 12H, C(CH<sub>3</sub>)<sub>2</sub>); **<sup>13</sup>C NMR** (101 MHz, CDCl<sub>3</sub>) δ = 168.2 (C=O), 157.4 (PhC<sub>1</sub>), 129.1 (PhC<sub>4</sub>), 128.1 (PhC<sub>5</sub>), 120.0 (PhC<sub>3</sub>), 119.4 (PhC<sub>2</sub>), 118.9 (PhC<sub>6</sub>), 83.9 (C(CH<sub>3</sub>)<sub>2</sub>), 82.3 (CMe<sub>3</sub>), 65.8 (CH<sub>2</sub>O), 28.1 (<sup>*t*</sup>Bu), 24.9 (C(CH<sub>3</sub>)<sub>2</sub>); **HRMS**: *m/z* (ESI<sup>+</sup>) calc. for C<sub>18</sub>H<sub>27</sub>BO<sub>5</sub> [M+Na]<sup>+</sup>: 357.1855; Obs.: 357.1844; **ν<sub>max</sub>**: (FT-ATR)/cm<sup>-1</sup>: 2979, 2993, 1754, 1576, 1428, 1355, 1317, 1213, 1147, 1085, 065, 852, 775, 705, 673, 599; **m.p.**: 65-69 °C.

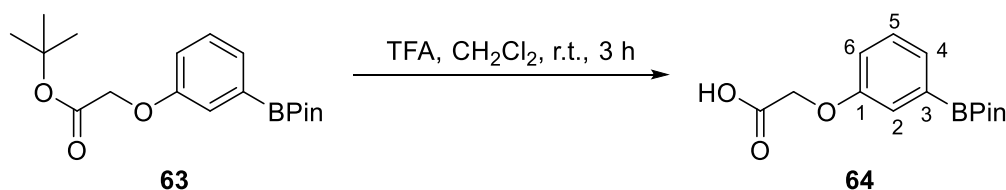

Trifluoroacetic acid (5 mL) was added dropwise to a solution of **63** (500 mg, 1.50 mmol) in dichloromethane (15 mL) and the mixture was stirred at r.t. for 3 h. The reaction mixture was then concentrated under reduced pressure and azeotroped with dichloromethane (3 × 20 mL) to afford a white powder. (344 mg, 1.24 mmol, 83%).

**R<sub>f</sub>**: 0.22 (1:9, EtOAc:petrol, UV active); **<sup>1</sup>H NMR** (600 MHz, DMSO-*d*<sub>6</sub>) δ = 7.32 (dd, *J* = 8.1, 7.2 Hz, 1H, PhH<sub>5</sub>), 7.27 (ddd, *J* = 7.2, 2.8, 1.2 Hz, 1H, PhH<sub>4</sub>), 7.11 (dd, *J* = 2.8, 1.2 Hz, 1H, PhH<sub>2</sub>), 7.05 (ddd, *J* = 8.1, 2.8, 1.2 Hz, 1H, PhH<sub>6</sub>), 4.69 (s, 2H, CH<sub>2</sub>O), 1.30 (s, 12H, C(CH<sub>3</sub>)<sub>2</sub>); **<sup>13</sup>C NMR** (101 MHz, DMSO-*d*<sub>6</sub>) δ = 170.7 (C=O), 157.8 (PhC<sub>1</sub>), 129.7 (PhC<sub>5</sub>), 127.7 (PhC<sub>4</sub>), 120.0 (PhC<sub>3</sub>), 119.6 (PhC<sub>2</sub>), 118.6 (PhC<sub>6</sub>), 84.2 (C(CH<sub>3</sub>)<sub>2</sub>), 64.8 (CH<sub>2</sub>O), 25.1 (C(CH<sub>3</sub>)<sub>2</sub>); **HRMS**: *m/z* (ESI<sup>-</sup>) calc. for C<sub>14</sub>H<sub>18</sub>BO<sub>5</sub> [M-H]<sup>-</sup>: 277.1263; Obs.: 277.1263; **ν<sub>max</sub>**: (FT-ATR)/cm<sup>-1</sup>: 3059, 2979, 2932, 1737, 1575, 1428, 1356, 1143, 1064, 964, 705; **m.p.**: 155-158 °C.

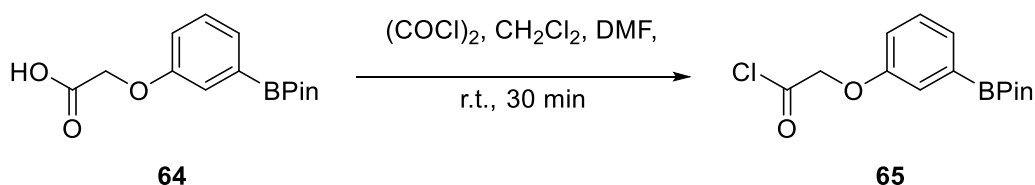

Oxalyl chloride (46  $\mu\text{L}$ , 0.540 mmol) was added to a solution of **64** (50 mg, 0.180 mmol), and dimethylformamide (1 drop) in dichloromethane (3 mL), and the mixture was stirred at r.t. for 30 min. Excess oxalyl chloride and dichloromethane were removed under reduced pressure to give the crude product as an orange oil, which was carried forward without further purification.

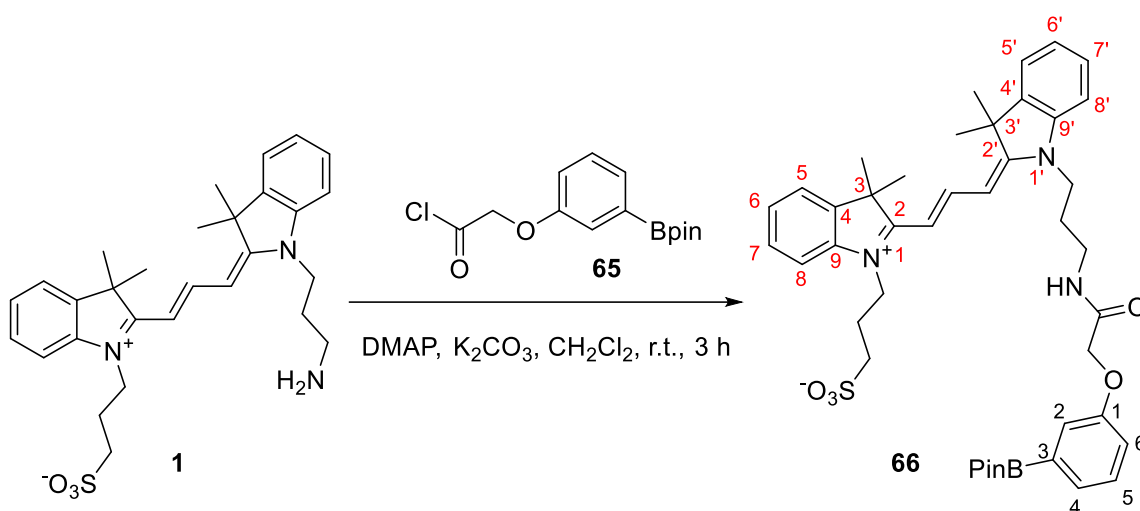

4-Dimethylaminopyridine (75 mg, 0.62 mmol) was added to a mixture of **1** (77 mg, 0.15 mmol), **65** (77 mg, 0.24 mmol), and potassium carbonate (62 mg, 0.44 mmol) in anhydrous dichloromethane (5 mL) and the reaction stirred at r.t. for 3 h. The reaction mixture was then added dropwise to diethyl ether (400 mL), and the resultant precipitate was collected by filtration, washed with diethyl ether (30 mL), and dried in air to give a pink powder. The precipitate was then purified via flash column chromatography on silica gel eluting with MeOH:CH<sub>2</sub>Cl<sub>2</sub> (5:95). Fractions containing the product were concentrated under reduced pressure to provide a pink oil. The residue was then redissolved in dichloromethane (30 mL), and the organics were washed with hydrochloric acid (0.1 M, 2  $\times$  10 mL) to remove co-ordinating 4-dimethylaminopyridine, dried with MgSO<sub>4</sub>, filtered, and concentrated under reduced pressure, to give a pink oil (5 mg, 6  $\mu\text{mol}$ , 4%).

**R<sub>f</sub>**: 0.34 (5:95, MeOH:CH<sub>2</sub>Cl<sub>2</sub>, visible light active); **<sup>1</sup>H NMR** (400 MHz, CD<sub>3</sub>OD)  $\delta$  = 8.54 (d,  $J_1 = J_2 = 13.5$  Hz, 1H, CHCHCN), 7.57-7.53 (m, 2H, H5, H5'), 7.49-7.37 (m, 4H, H7,

$\underline{\text{H}}7'$ ,  $\underline{\text{H}}8$ ,  $\underline{\text{H}}8'$ ), 7.34-7.31 (m, 2H,  $\underline{\text{H}}6$ ,  $\underline{\text{H}}6'$ ), 7.31-7.25 (m, 2H,  $\text{Ph}\underline{\text{H}}5$ ,  $\text{Ph}\underline{\text{H}}4$ ), 7.25-7.21 (m, 1H,  $\text{Ph}\underline{\text{H}}6$ ), 7.11-7.07 (m, 1H,  $\text{Ph}\underline{\text{H}}2$ ), 6.57 (d,  $J = 13.5$  Hz, 1H,  $\underline{\text{CH}}\underline{\text{CN}}$ ), 6.46 (d,  $J = 13.5$  Hz, 1H,  $\underline{\text{CH}}\underline{\text{CN}}$ ), 4.56 (s, 2H,  $\underline{\text{CH}}_2\text{O}$ ), 4.33-4.26 (m, 2H,  $\underline{\text{CH}}_2\text{CH}_2\text{CH}_2\text{SO}_3$ ), 4.18 (t,  $J = 7.5$  Hz, 2H,  $\underline{\text{CH}}_2\text{CH}_2\text{CH}_2\text{NH}$ ), 3.47 (t,  $J = 7.5$  Hz, 2H,  $\underline{\text{CH}}_2\text{NH}$ ), 3.00 (t,  $J = 7.8$  Hz, 2H,  $\underline{\text{CH}}_2\text{SO}_3$ ), 2.25 (tt,  $J_1 = J_2 = 7.8$  Hz, 2H,  $\underline{\text{CH}}_2\text{CH}_2\text{SO}_3$ ), 2.11 (tt,  $J_1 = J_2 = 7.5$  Hz, 2H,  $\underline{\text{CH}}_2\text{CH}_2\text{NH}$ ), 1.79 (s, 12H,  $\text{CyCH}_3$ );  $^{13}\text{C}$  NMR (151 MHz,  $\text{CD}_3\text{OD}$ )  $\delta = 176.3$  ( $\underline{\text{CONH}}$ ), 174.7 ( $\underline{\text{CHCHCN}}$ ), 170.2 ( $\underline{\text{C}}2$ ,  $\underline{\text{C}}2'$ ), 157.2 ( $\text{Ph}\underline{\text{C}}1$ ), 150.8 ( $\underline{\text{C}}3$ ,  $\underline{\text{C}}3'$ ), 141.8 ( $\underline{\text{C}}9$ ,  $\underline{\text{C}}9'$ ), 140.8 ( $\underline{\text{C}}4$ ,  $\underline{\text{C}}4'$ ), 129.8 ( $\text{Ph}\underline{\text{C}}5$ ), 128.7 ( $\underline{\text{C}}7$ ,  $\underline{\text{C}}7'$ ), 127.1 ( $\text{Ph}\underline{\text{C}}4$ ), 126.5 ( $\text{Ph}\underline{\text{C}}3$ ), 125.4 ( $\underline{\text{C}}6$ ,  $\underline{\text{C}}6'$ ), 122.1 ( $\underline{\text{C}}5$ ,  $\underline{\text{C}}5'$ ), 119.1 ( $\text{Ph}\underline{\text{C}}2$ ), 116.0 ( $\text{Ph}\underline{\text{C}}6$ ), 111.2 ( $\underline{\text{C}}8/\underline{\text{C}}8'$ ), 110.9 ( $\underline{\text{C}}8/\underline{\text{C}}8'$ ), 102.7 ( $\underline{\text{CHCN}}$ ), 102.6 ( $\underline{\text{CHCN}}$ ), 66.9 ( $\underline{\text{CH}}_2\text{CO}$ ), 46.8 ( $\underline{\text{CH}}_2\text{SO}_3$ ), 42.5 ( $\underline{\text{CH}}_2\text{CH}_2\text{CH}_2\text{SO}_3$ ), 41.4 ( $\underline{\text{CH}}_2\text{CH}_2\text{CH}_2\text{NH}$ ), 36.0 ( $\underline{\text{CH}}_2\text{NH}$ ), 26.9 ( $\text{CyCH}_3$ ), 26.6 ( $\underline{\text{CH}}_2\text{CH}_2\text{NH}_2$ ), 22.8 ( $\underline{\text{CH}}_2\text{CH}_2\text{SO}_3$ ); **HRMS**:  $m/z$  ( $\text{ESI}^+$ ) calc. for  $\text{C}_{43}\text{H}_{54}\text{BN}_3\text{O}_7\text{S}$   $[\text{M}+\text{Na}]^+$ : 790.3668; Obs.: 790.3712;  $\nu_{\text{max}}$ : (FT-ATR)/ $\text{cm}^{-1}$ : 3378, 2921, 2850, 1558, 1457, 1430, 1372, 1152, 1114, 749.

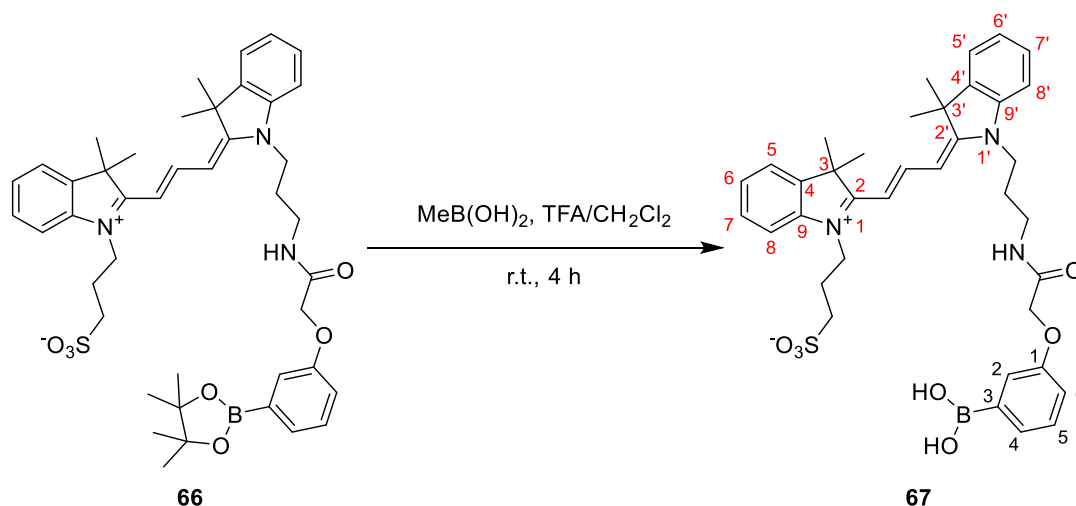

A solution of **66** (5 mg, 6.5  $\mu\text{mol}$ ) and methylboronic acid (4 mg, 65.3  $\mu\text{mol}$ ) in a mixture of dichloromethane (5 mL) and trifluoroacetic acid (0.5 mL) was stirred at r.t. for 4 h. The reaction mixture was then concentrated under reduced pressure. The residue was azeotroped with hydrochloric acid (0.1 M, 2  $\times$  10 mL) to give a pink oil (4 mg, 6.5  $\mu\text{mol}$ , quantitative yield).

**R<sub>f</sub>**: 0.29 (5:95,  $\text{MeOH}:\text{CH}_2\text{Cl}_2$ , visible light active);  $^1\text{H}$  NMR (600 MHz,  $\text{CD}_3\text{OD}$ )  $\delta = 8.54$  (dd,  $J_1 = J_2 = 13.4$  Hz, 1H,  $\underline{\text{CHCHCN}}$ ), 7.57-7.53 (m, 2H,  $\underline{\text{H}}5$ ,  $\underline{\text{H}}5'$ ), 7.49-7.40 (m, 3H,  $\underline{\text{H}}7$ ,  $\underline{\text{H}}7'$ ,  $\underline{\text{H}}8/\underline{\text{H}}8'$ ), 7.34 – 7.27 (m, 3H  $\underline{\text{H}}6$ ,  $\underline{\text{H}}6'$ ,  $\underline{\text{H}}8/\underline{\text{H}}8'$ ), 6.62-6.52 (m, 1H,  $\underline{\text{CHCN}}$ ), 6.48-6.42 (m, 1H,  $\underline{\text{CHCN}}$ ), 4.56 (s, 2H,  $\underline{\text{CH}}_2\text{O}$ ), 4.29 (d,  $J = 7.2$  Hz, 2H,  $\underline{\text{CH}}_2\text{CH}_2\text{CH}_2\text{SO}_3$ ),

4.18 (t,  $J = 7.5$  Hz, 2H,  $\text{CH}_2\text{CH}_2\text{CH}_2\text{NH}$ ), 3.48 (t,  $J = 7.5$  Hz, 2H,  $\text{CH}_2\text{NH}$ ), 2.99 (t,  $J = 7.2$  Hz, 2H,  $\text{CH}_2\text{SO}_3$ ), 2.25 (tt,  $J_1 = J_2 = 7.2$  Hz, 2H,  $\text{CH}_2\text{CH}_2\text{SO}_3$ ), 2.11 (tt,  $J_1 = J_2 = 7.5$  Hz, 2H,  $\text{CH}_2\text{CH}_2\text{CH}_2\text{NH}$ ), 1.78 (s, 12H,  $\text{CyCH}_3$ );  $^{13}\text{C}$  NMR (151 MHz,  $\text{CD}_3\text{OD}$ )  $\delta = 174.6$  ( $\text{CONH}$ ), 174.5 ( $\text{CHCHCN}$ ), 157.3 ( $\text{C}_2$ ,  $\text{C}_2'$ ), 150.8 ( $\text{C}_3$ ,  $\text{C}_3'$ ), 141.8 ( $\text{C}_9$ ,  $\text{C}_9'$ ), 140.8 ( $\text{C}_4$ ,  $\text{C}_4'$ ), 128.7 (Ph $\text{C}_5$ ), 128.6 ( $\text{C}_7$ ,  $\text{C}_7'$ ), 125.4 (Ph $\text{C}_4$ ), 125.3 (Ph $\text{C}_3$ ), 122.1 ( $\text{C}_6$ ,  $\text{C}_6'$ ), 122.1 ( $\text{C}_5$ ,  $\text{C}_5'$ ), 119.1 (Ph $\text{C}_2$ ), 116.7 (Ph $\text{C}_6$ ), 111.2 ( $\text{C}_8/\text{C}_8'$ ), 110.9 ( $\text{C}_8/\text{C}_8'$ ), 102.9 ( $\text{CHCN}$ ), 102.7 ( $\text{CHCN}$ ), 66.9 ( $\text{CH}_2\text{CO}$ ), 49.2 ( $\text{CH}_2\text{SO}_3$ ), 42.5 ( $\text{CH}_2\text{CH}_2\text{CH}_2\text{SO}_3$ ), 41.4 ( $\text{CH}_2\text{CH}_2\text{CH}_2\text{NH}$ ), 36.0 ( $\text{CH}_2\text{NH}$ ), 27.0 ( $\text{CyCH}_3$ ), 26.9 ( $\text{CH}_2\text{CH}_2\text{NH}_2$ ), 22.7 ( $\text{CH}_2\text{CH}_2\text{SO}_3$ ); **HRMS**:  $m/z$  (ESI $^+$ ) calc. for  $\text{C}_{37}\text{H}_{44}\text{BN}_3\text{O}_7\text{S}$   $[\text{M}+\text{Na}]^+$ : 708.2882; Obs.: 708.2885;  $\nu_{\text{max}}$ : (FT-ATR)/ $\text{cm}^{-1}$ : 3321, 2923, 1663, 1559, 1429, 1373, 1229, 1151, 1113, 1039, 756;

## 5. Synthesis of OBA substrates for NMR and LC-MS studies

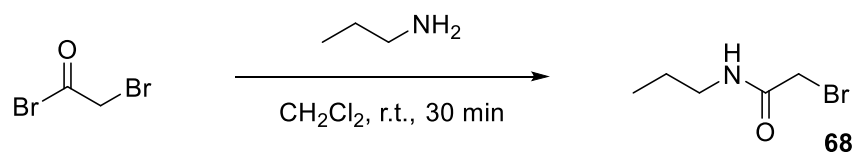

Propylamine (3.78 mL, 45.4 mmol) was added to a solution of bromoacetyl bromide (2.00 mL, 22.6 mmol) in dichloromethane (40 mL) and stirred at r.t. for 30 min. The mixture was then diluted with water (150 mL) and the aqueous extracted with dichloromethane (3  $\times$  70 mL). The combined organics were washed with brine (2  $\times$  200 mL), dried with  $\text{MgSO}_4$ , filtered, and concentrated under reduced pressure to provide a colourless oil (3.40 g, 19.0 mmol, 84%).

**R<sub>f</sub>**: 0.32 (2:8, EtOAc:Petrol);  $^1\text{H}$  NMR (400 MHz,  $\text{CDCl}_3$ )  $\delta = 6.67$  (s, 1H,  $\text{NH}$ ), 3.88 (s, 2H,  $\text{CH}_2\text{Br}$ ), 3.28-3.15 (m, 2H,  $\text{CH}_2\text{N}$ ), 2.00-1.91 (m, 2H,  $\text{CH}_2\text{CH}_3$ ), 0.92 (t,  $J = 7.4$  Hz, 3H,  $\text{CH}_3$ );  $^{13}\text{C}$  NMR (101 MHz,  $\text{CDCl}_3$ )  $\delta = 165.8$  ( $\text{CON}$ ), 42.0 ( $\text{CH}_2\text{NH}$ ), 29.4 ( $\text{CH}_2\text{Br}$ ), 22.6 ( $\text{CH}_2\text{CH}_3$ ), 11.3 ( $\text{CH}_3$ ); **HRMS**:  $m/z$  (ESI $^+$ ) calc. for  $\text{C}_5\text{H}_{10}^{79}\text{BrNO}$   $[\text{M}+\text{H}]^+$ : 181.0019; Obs.: 181.0020;  $\nu_{\text{max}}$ : (FT-ATR)/ $\text{cm}^{-1}$ : 3265, 3073, 2965, 2934, 2876, 1738, 1650, 1550, 1460, 1437, 1313, 1211, 1150, 953, 651, 550.

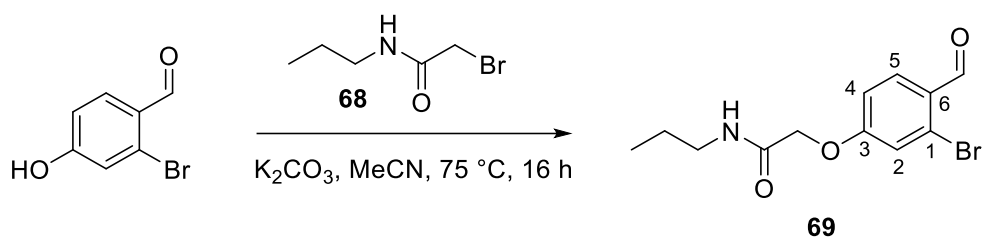

A mixture of 2-bromo-4-hydroxybenzaldehyde (1.56 g, 8.57 mmol), **68** (1.72 g, 8.57 mmol) and potassium carbonate (2.01 g, 14.6 mmol) in acetonitrile (30 mL) was stirred at 75 °C for 16 h. The mixture was then cooled to r.t. and diluted with water (150 mL). The aqueous was extracted with ethyl acetate (3 × 70 mL), and the combined organics washed with brine (2 × 200 mL), dried with MgSO<sub>4</sub>, filtered, and concentrated under reduced pressure to provide an orange oil (2.50 g, 8.32 mmol, 97%). Data were consistent with those previously reported.<sup>3</sup>

**R<sub>f</sub>**: 0.30 (2:8, EtOAc:Petrol, UV active); **<sup>1</sup>H NMR** (400 MHz, CDCl<sub>3</sub>); δ = 10.20 (s, 1H, PhCOH), 7.89 (d, *J* = 8.7 Hz, 1H, PhH5), 7.17 (d, *J* = 2.5 Hz, 1H, PhH2), 6.96 (dt, *J* = 8.7, 2.5 Hz, 1H, PhH4), 6.49 (s, 1H, NH), 4.54 (s, 2H, CH2O), 3.30 (t, *J* = 7.4 Hz, 2H, CH2N), 1.60-1.52 (m, 2H, CH2CH<sub>3</sub>), 0.91 (t, *J* = 7.4 Hz, 3H, CH3); **<sup>13</sup>C NMR** (101 MHz, CDCl<sub>3</sub>) δ = 190.5 (PhCOH), 166.6 (CON), 161.8 (PhC3), 131.8 (PhC5), 128.8 (PhC6), 128.3 (PhC1), 119.6 (PhC2), 114.5 (PhC4), 67.6 (CH2O), 41.0 (CH2N), 22.9 (CH2CH<sub>3</sub>), 11.4 (CH<sub>3</sub>); **HRMS**: *m/z* (ESI<sup>+</sup>) calc. for C<sub>12</sub>H<sub>14</sub>NO<sub>3</sub> [M+Na]<sup>+</sup>: 324.0028; Obs.: 324.0028; **ν<sub>max</sub>**: (FT-ATR)/cm<sup>-1</sup>: 3319, 2974, 2934, 2876, 1679, 1590, 1540, 1412, 1336, 1215, 1142, 965, 852, 831, 675, 578.

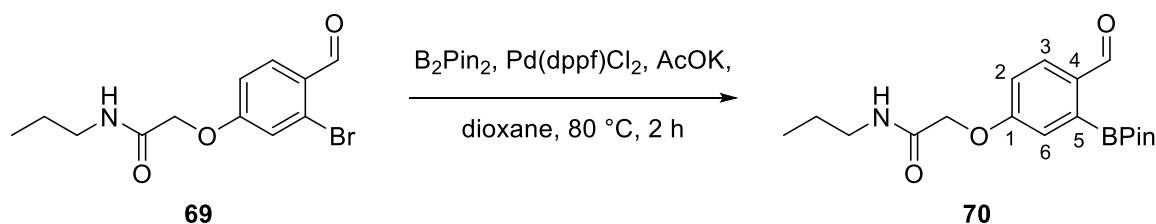

**69** (300 mg, 1.00 mmol), bis(pinacolato)diboron (660 mg, 2.60 mmol), 1,1'-[bis(diphenylphosphino)ferrocene]dichloropalladium(II) (146 mg, 0.20 mmol), and potassium acetate (530 mg, 5.40 mmol) were placed under a nitrogen atmosphere, and anhydrous dioxane (20 mL) was added. The reaction was degassed under a constant flow of nitrogen for 10 min, and then stirred at 80 °C for 16 h. After cooling to r.t., the reaction was concentrated under reduced pressure. The residue was purified via flash column chromatography on silica gel, eluting with EtOAc:Petrol (2:8).

Fractions containing the product were concentrated under reduced pressure to yield a colourless oil (34 mg, 95  $\mu$ mol, 9%).

**R<sub>f</sub>**: 0.25 (2:8, EtOAc:Petrol, UV active); **<sup>1</sup>H NMR** (400 MHz, CDCl<sub>3</sub>)  $\delta$  = 10.29 (s, 1H, PhCOH), 7.86 (d,  $J$  = 8.6 Hz, 1H, PhH<sub>3</sub>), 7.00 (dd,  $J$  = 8.6, 2.8 Hz, 1H, PhH<sub>2</sub>), 6.80 (t,  $J$  = 2.8 Hz, 1H, PhH<sub>6</sub>), 6.51 (s, 1H, NH), 4.51 (s, 2H, CH<sub>2</sub>O), 3.22 (dt,  $J_1$  =  $J_2$  = 6.6 Hz, 2H, CH<sub>2</sub>N), 1.51-1.45 (m, 2H, CH<sub>2</sub>CH<sub>3</sub>), 1.30 (s, 12H, Pin), 0.84-0.79 (m, 3H, CH<sub>3</sub>); **<sup>13</sup>C NMR** (101 MHz, CDCl<sub>3</sub>)  $\delta$  = 193.0 (C=O), 167.8 (CON), 160.7 (PhC<sub>1</sub>), 135.6 (PhC<sub>4</sub>), 130.7 (PhC<sub>5</sub>), 122.3 (PhC<sub>2</sub>), 121.0 (PhC<sub>3</sub>), 116.6 (PhH<sub>6</sub>), 84.6 (C(CH<sub>3</sub>)<sub>2</sub>), 82.8 (C(CH<sub>3</sub>)<sub>2</sub>), 67.1 (CH<sub>2</sub>O), 40.9 (CH<sub>2</sub>N), 24.8 (Pin), 22.7 (CH<sub>2</sub>CH<sub>3</sub>), 11.3 (CH<sub>3</sub>); **HRMS**:  $m/z$  (ESI<sup>+</sup>) calc. for C<sub>18</sub>H<sub>26</sub>BNO<sub>5</sub> [M+Na]<sup>+</sup>: 370.1796; Obs.: 370.1802; **v<sub>max</sub>**: (FT-ATR)/cm<sup>-1</sup>: 3315, 2966, 2933, 2875, 1657, 1542, 1422, 1336, 1213, 1141, 1060, 964, 812, 675, 578.

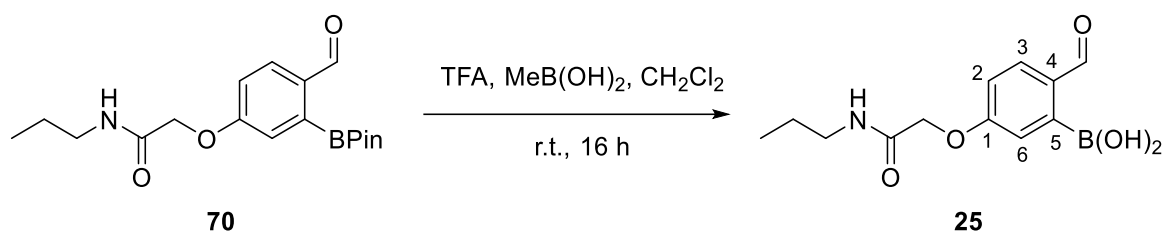

Trifluoroacetic acid (2 mL) was added to a solution of **70** (34 mg, 95  $\mu$ mol) and methylboronic acid (57 mg, 0.95 mmol) in dichloromethane (10 mL), and the mixture stirred at r.t for 16 h. The reaction was concentrated under reduced pressure and the residue azeotroped with dichloromethane (3  $\times$  20 mL), then hydrochloric acid (0.1 M, 2  $\times$  10 mL), to give a brown oil (25 mg, 95  $\mu$ mol, quantitative yield).

**R<sub>f</sub>**: 0.18 (3:7, EtOAc:Petrol, UV active); **<sup>1</sup>H NMR** (400 MHz, 100 mM deuterated PBS + 10% DMSO-*d*<sub>6</sub>)  $\delta$  = 9.84 (s, 1H, -CHO), 7.97-8.01 (m, 1H, PhH<sub>3</sub>), 7.21-7.14 (m, 2H, PhH<sub>6</sub> and PhH<sub>2</sub>), 4.75 (s, 2H, CH<sub>2</sub>O), 3.25 (t,  $J$  = 6.9 Hz, 2H, CH<sub>2</sub>N), 1.54 (tt,  $J_1$  =  $J_2$  = 6.9 Hz, 2H, CH<sub>2</sub>CH<sub>3</sub>), 0.88 (t,  $J$  = 6.9 Hz, 3H, CH<sub>3</sub>); **<sup>13</sup>C NMR** (101 MHz, 100 mM deuterated PBS + 10% DMSO-*d*<sub>6</sub>)  $\delta$  = 195.2 (-CHO), 170.3 (CON), 161.9 (PhC<sub>1</sub>), 136.1 (PhC<sub>4</sub>), 132.4 (PhC<sub>5</sub>), 118.2 (PhC<sub>2</sub>), 115.3 (PhC<sub>3</sub>), 114.56 (PhH<sub>6</sub>), 66.6 (CH<sub>2</sub>O), 40.9 (CH<sub>2</sub>N), 21.9 (CH<sub>2</sub>CH<sub>3</sub>), 10.6 (CH<sub>3</sub>); **HRMS**:  $m/z$  (ESI<sup>+</sup>) calc. for C<sub>12</sub>H<sub>16</sub>BNO<sub>5</sub> [M-H]<sup>+</sup>: 288.1014; Obs.: 288.1018; **v<sub>max</sub>**: (FT-ATR)/cm<sup>-1</sup>: 3329, 3010, 2996, 2980, 1690, 1592, 1555, 1456, 1320, 1286, 1130, 911, 750, 512.

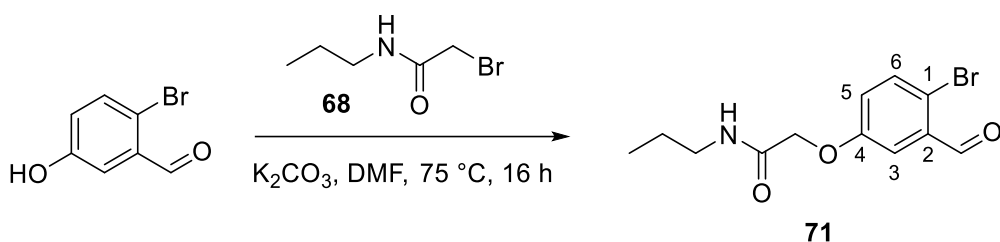

A mixture of 2-bromo-4-hydroxybenzaldehyde (800 mg, 4.00 mmol), bromoacetate **68** (864 mg, 4.80 mmol) and potassium carbonate (1.10 g, 8.00 mmol) in dimethylformamide (30 mL) was stirred at 75 °C for 16 h. The mixture was then cooled to r.t. and diluted with water (150 mL). The aqueous mixture was extracted with ethyl acetate (3 × 70 mL), and the combined organics washed with brine (2 × 200 mL), dried with  $\text{MgSO}_4$ , filtered and concentrated under reduced pressure. The residue was purified via flash column chromatography on silica gel eluting with EtOAc:Petrol (2:8). Fractions containing the product were concentrated under reduced pressure to provide a white solid (700 mg, 2.34 mmol, 59%).

**R<sub>f</sub>**: 0.32 (2:8, EtOAc:Petrol, UV active); **<sup>1</sup>H NMR** (400 MHz,  $\text{CDCl}_3$ )  $\delta$  = 10.29 (s, 1H,  $\text{CHO}$ ), 7.59 (d,  $J$  = 8.6 Hz, 1H,  $\text{PhH}_6$ ), 7.45 (d,  $J$  = 1.6 Hz, 1H,  $\text{PhH}_3$ ), 7.07 (dd,  $J$  = 8.6, 1.6 Hz, 1H,  $\text{PhH}_5$ ), 6.50 (s, 1H,  $\text{NH}$ ), 4.50 (s, 2H,  $\text{CH}_2\text{O}$ ), 3.36-3.27 (m, 2H,  $\text{CH}_2\text{N}$ ), 1.59-1.53 (m, 2H,  $\text{CH}_2\text{CH}_3$ ), 0.94 (t,  $J$  = 7.6 Hz, 3H,  $\text{CH}_3$ ); **<sup>13</sup>C NMR** (101 MHz,  $\text{CDCl}_3$ )  $\delta$  = 191.4 ( $\text{CHO}$ ), 167.1 ( $\text{CON}$ ), 156.9 ( $\text{PhC}_4$ ), 135.1 ( $\text{PhC}_6$ ), 134.4 ( $\text{PhC}_1$ ), 122.4 ( $\text{PhC}_5$ ), 119.2 ( $\text{PhC}_2$ ), 114.9 ( $\text{PhC}_3$ ), 67.7 ( $\text{CH}_2\text{O}$ ), 40.9 ( $\text{CH}_2\text{N}$ ), 22.9 ( $\text{CH}_2\text{CH}_3$ ), 11.4 ( $\text{CH}_3$ ); **HRMS**:  $m/z$  (ESI<sup>+</sup>) calc. for  $\text{C}_{12}\text{H}_{14}^{79}\text{BrNO}_3$   $[\text{M}+\text{H}]^+$ : 300.0231; Obs.: 300.0231;  **$\nu_{\text{max}}$** : (FT-ATR)/ $\text{cm}^{-1}$ : 3350, 3075, 2963, 2870, 1667, 1540, 1285, 1227, 1068, 959, 824, 695, 597.

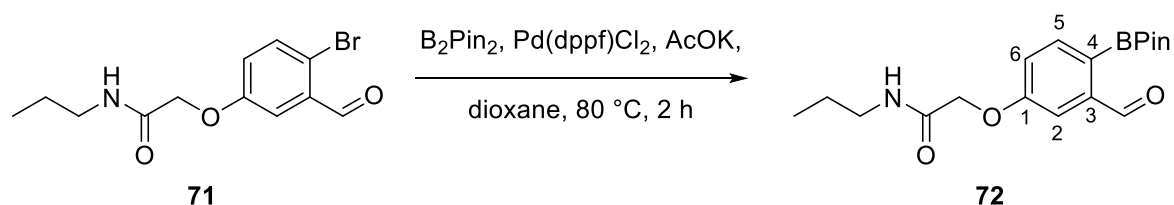

**71** (200 mg, 0.66 mmol), bis(pinacolato)diboron (205 mg, 0.80 mmol), 1,1'-[bis(diphenylphosphino)ferrocene]dichloropalladium(II) (24 mg, 0.03 mmol) and potassium acetate (194 mg, 2.00 mmol) were placed under a nitrogen atmosphere, and anhydrous dioxane (5 mL) was added. Nitrogen was bubbled through the reaction mixture for 10 min, which was then stirred at 80 °C for 2 h. After cooling to r.t., the

reaction was concentrated under reduced pressure. The residue was then dissolved in ethyl acetate (100 mL), and washed with water (2 × 70 mL) and brine (2 × 70 mL), and dried with MgSO<sub>4</sub>, filtered and concentrated under reduced pressure. The residue was purified via flash column chromatography on silica gel, eluting with EtOAc:Petrol (2:8). Fractions containing the product were concentrated under reduced pressure to yield a colourless oil (190 mg, 0.548 mmol, 83%).

**R<sub>f</sub>**: 0.34 (2:8, EtOAc:Petrol, UV active); **<sup>1</sup>H NMR** (400 MHz, CDCl<sub>3</sub>) δ = 10.64 (s, 1H, CHO), 7.90 (d, *J* = 8.4 Hz, 1H, PhH<sub>5</sub>), 7.51 (d, *J* = 2.2 Hz, 1H, PhH<sub>2</sub>), 7.13 (dd, *J* = 8.4, 2.2 Hz, 1H, PhH<sub>6</sub>), 6.55 (s, 1H, NH), 4.54 (s, 2H, CH<sub>2</sub>O), 3.30 (t, *J* = 7.4 Hz, 2H, CH<sub>2</sub>N), 1.62-1.51 (m, 2H, CH<sub>2</sub>CH<sub>3</sub>), 1.36 (s, 12H, Pin), 0.92 (t, *J* = 7.6 Hz, 3H, CH<sub>3</sub>); **<sup>13</sup>C NMR** (101 MHz, CDCl<sub>3</sub>) δ = 194.4 (CHO), 167.4 (CON), 159.5 (PhC<sub>1</sub>), 143.8 (PhC<sub>4</sub>), 138.5 (PhC<sub>5</sub>), 119.3 (PhC<sub>6</sub>), 119.2 (PhC<sub>3</sub>), 112.4 (PhC<sub>2</sub>), 84.5 (C(CH<sub>3</sub>)<sub>2</sub>), 67.3 (CH<sub>2</sub>O), 40.9 (CH<sub>2</sub>N), 25.0 (Pin), 22.9 (CH<sub>2</sub>CH<sub>3</sub>), 11.4 (CH<sub>3</sub>); **HRMS**: *m/z* (ESI<sup>+</sup>) calc. for C<sub>18</sub>H<sub>26</sub>BN<sub>2</sub>O<sub>5</sub> [M+H]<sup>+</sup>: 348.1977; Obs.: 348.1981; **v<sub>max</sub>**: (FT-ATR)/cm<sup>-1</sup>: 3323, 2975, 1685, 1663, 1596, 1538, 1378, 1344, 1269, 1243, 1112, 1042, 962, 857, 652, 579.

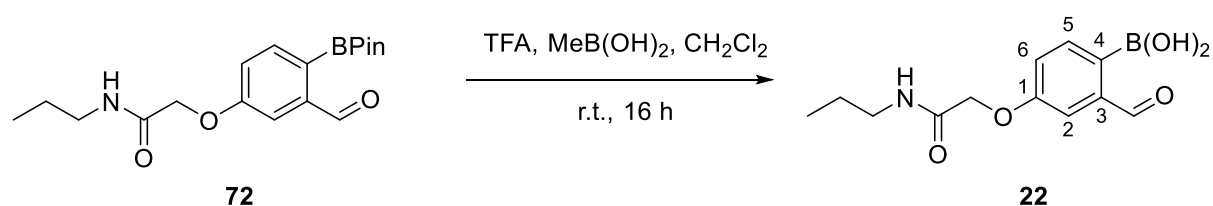

Trifluoroacetic acid (2.0 mL) was added to a solution of **72** (132 mg, 0.42 mmol) and methylboronic acid (216 mg, 3.60 mmol) in dichloromethane (10 mL), and the mixture stirred at r.t for 16 h. The reaction was azeotroped with dichloromethane (3 × 20 mL), and hydrochloric acid (0.1 M, 2 × 10 mL) was added, and concentrated under reduced pressure to give a colourless oil (98 mg, 0.42 mmol, quantitative yield).

**R<sub>f</sub>**: 0.21 (2:8, EtOAc:Petrol, UV active); **<sup>1</sup>H NMR** (400 MHz, 100 mM deuterated PBS + 10% DMSO-*d*<sub>6</sub>) δ = 9.97 (s, 1H, -CHO), 7.69-7.59 (m, 1H, PhH<sub>6</sub>), 7.54 (d, *J* = 2.4 Hz, 1H, PhH<sub>2</sub>), 7.32 (d, *J* = 8.3 Hz, 1H, PhH<sub>5</sub>), 4.70 (s, 2H, CH<sub>2</sub>O), 3.24 (t, *J* = 6.9 Hz, 2H, CH<sub>2</sub>N), 1.57-1.47 (m, 2H, CH<sub>2</sub>CH<sub>3</sub>), 0.85 (t, *J* = 7.1 Hz, 3H, CH<sub>3</sub>); **<sup>13</sup>C NMR** (101 MHz, CD<sub>3</sub>OD, for acetal) δ = 169.6 (CON), 158.1 (PhC<sub>1</sub>), 143.5 (PhC<sub>4</sub>), 131.8 (PhC<sub>5</sub>), 114.2 (PhC<sub>6</sub>), 111.9 (PhC<sub>3</sub>), 102.3 (PhC<sub>2</sub>), 66.9 (CH<sub>2</sub>O), 40.6 (CH<sub>2</sub>N), 22.4 (CH<sub>2</sub>CH<sub>3</sub>), 10.4 (CH<sub>3</sub>); **HRMS**: *m/z* (ESI<sup>+</sup>) calc. for C<sub>12</sub>H<sub>16</sub>BN<sub>2</sub>O<sub>5</sub> [M+Na]<sup>+</sup>: 288.1014; Obs.:

288.1016;  $\nu_{\text{max}}$ : (FT-ATR)/ $\text{cm}^{-1}$ : 3395, 2968, 2938, 2875, 1661, 1548, 1426, 1348, 1274, 1230, 1148, 807.

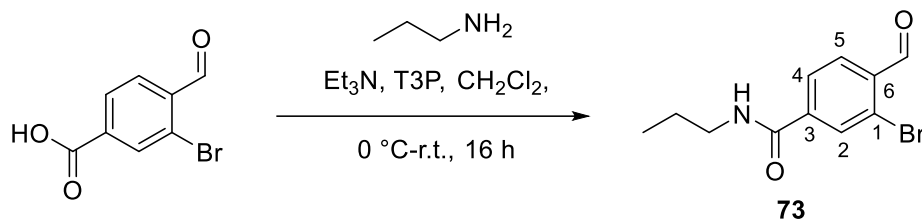

To a solution of 3-bromo-4-formylbenzoic acid (1.00 g, 4.37 mmol), propylamine (430  $\mu\text{L}$ , 5.24 mmol) and triethylamine (2.79 mL, 21.8 mmol) in dichloromethane (5 mL), was added propylphosphonic anhydride solution (50% w/w in EtOAc, 3.47 mL, 10.9 mmol) at 0 °C and the mixture was warmed to r.t. and stirred for 16 h. The reaction was then concentrated under reduced pressure. The residue was purified via flash column chromatography on silica gel eluting with EtOAc:Petrol (1:9). Fractions containing the product were concentrated under reduced pressure to provide a colourless oil (547 mg, 2.03 mmol, 46%).

**R<sub>f</sub>**: 0.28 (1:9, EtOAc:Petrol, UV active); **<sup>1</sup>H NMR** (400 MHz,  $\text{CDCl}_3$ )  $\delta$  = 10.36 (s, 1H,  $\text{CH}_\text{O}$ ), 8.04 (d,  $J$  = 1.6 Hz, 1H,  $\text{PhH}_2$ ), 7.93 (d,  $J$  = 8.0 Hz, 1H,  $\text{PhH}_5$ ), 7.74 (dd,  $J$  = 8.0, 1.6 Hz, 1H,  $\text{PhH}_4$ ), 6.25 (s, 1H,  $\text{NH}$ ), 3.44-3.38 (m, 2H,  $\text{CH}_2\text{N}$ ), 1.67-1.61 (m, 2H,  $\text{CH}_2\text{CH}_3$ ), 0.98 (t,  $J$  = 7.4 Hz, 3H,  $\text{CH}_3$ ); **<sup>13</sup>C NMR** (101 MHz,  $\text{CDCl}_3$ )  $\delta$  = 191.3 ( $\text{CHO}$ ), 165.2 ( $\text{CON}$ ), 141.0 ( $\text{PhC}_4$ ), 135.2 ( $\text{PhC}_3$ ), 132.8 ( $\text{PhC}_2$ ), 130.1 ( $\text{PhC}_1$ ), 127.2 ( $\text{PhC}_4$ ), 126.1 ( $\text{PhC}_5$ ), 42.2 ( $\text{CH}_2\text{N}$ ), 22.9 ( $\text{CH}_2\text{CH}_3$ ), 11.5 ( $\text{CH}_3$ ); **HRMS**:  $m/z$  ( $\text{ESI}^+$ ) calc. for  $\text{C}_{11}\text{H}_{12}^{79}\text{BrNO}_2$  [ $\text{M}+\text{H}$ ] $^+$ : 270.1260; Obs.: 270.0124;  $\nu_{\text{max}}$ : (FT-ATR)/ $\text{cm}^{-1}$ : 3313, 3075, 2965, 2934, 2875, 1698, 1642, 1545, 1467, 1441, 1313, 1288, 1202, 1039, 891, 846, 758, 653.

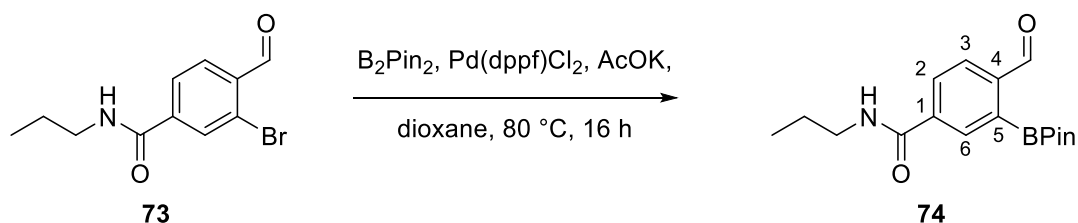

**73** (265 mg, 0.981 mmol), bis(pinacolato)diboron (648 mg, 2.55 mmol), 1,1'-[bis(diphenylphosphino)ferrocene]dichloropalladium(II) (144 mg, 0.196 mmol) and potassium acetate (520 mg, 5.30 mmol) were placed under a nitrogen atmosphere, and anhydrous dioxane (15 mL) was added. Nitrogen was bubbled through the reaction mixture for 10 min, which was then stirred at 80 °C for 16 h. After cooling to

r.t., the reaction was concentrated under reduced pressure. The residue was purified via flash column chromatography on silica gel, eluting with EtOAc:Petrol (2:8). Fractions containing the product were concentrated under reduced pressure to yield a colourless oil (206 mg, 0.619 mmol, 24%).

**R<sub>f</sub>**: 0.37 (2:8, EtOAc:Petrol, UV active); **<sup>1</sup>H NMR** (400 MHz, CDCl<sub>3</sub>)  $\delta$  = 10.52 (s, 1H, CHO), 8.15 (d,  $J$  = 1.4 Hz, 1H, PhH<sub>6</sub>), 7.94-7.88 (m, 2H, PhH<sub>2</sub>, PhH<sub>3</sub>), 6.70 (t,  $J$  = 5.9 Hz, 1H, NH), 3.38-3.31 (m, 2H, CH<sub>2</sub>N), 1.58 (dt,  $J_1 = J_2$  = 7.5 Hz, 2H, CH<sub>2</sub>CH<sub>3</sub>), 1.32 (s, 12H, Pin), 0.91 (t,  $J$  = 7.5 Hz, 3H, CH<sub>3</sub>); **<sup>13</sup>C NMR** (101 MHz, CDCl<sub>3</sub>)  $\delta$  = 194.2 (CHO), 166.8 (CON), 143.1 (PhC<sub>4</sub>), 138.6 (PhC<sub>1</sub>), 134.0 (PhC<sub>6</sub>), 133.9 (PhC<sub>5</sub>), 129.7 (PhC<sub>2</sub>), 128.0 (PhC<sub>3</sub>), 83.2 (C(CH<sub>3</sub>)<sub>2</sub>), 83.0 (C(CH<sub>3</sub>)<sub>2</sub>), 42.0 (CH<sub>2</sub>N), 24.6 (Pin), 22.9 (CH<sub>2</sub>CH<sub>3</sub>), 11.5 (CH<sub>3</sub>); **HRMS**:  $m/z$  (ESI<sup>-</sup>) calc. for C<sub>11</sub>H<sub>13</sub>BNO<sub>4</sub> [M-Pin]<sup>-</sup>: 234.0943; Obs.: 234.0948;  **$\nu_{\text{max}}$** : (FT-ATR)/cm<sup>-1</sup>: 3358, 2977, 1643, 1535, 1452, 1371, 1341, 1141, 982, 851, 673, 578,.

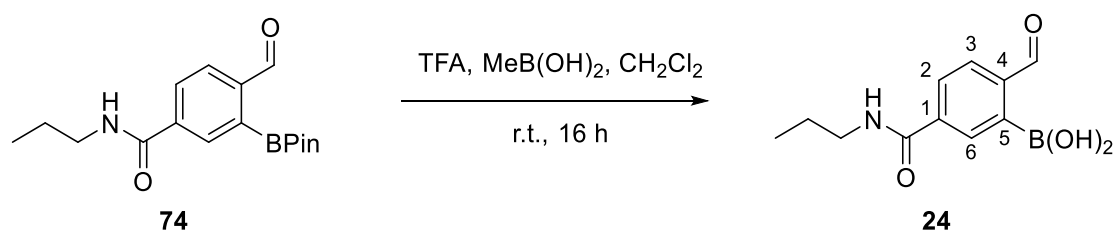

Trifluoroacetic acid (1.0 mL) was added to a solution of **74** (70 mg, 0.22 mmol) and methylboronic acid (132 mg, 2.21 mmol) in dichloromethane (5 mL), and the mixture stirred at r.t for 16 h. The reaction was azeotroped with dichloromethane (3 × 20 mL), and hydrochloric acid (0.1 M, 2 × 10 mL) was added, and concentrated under reduced pressure to give a yellow oil (52 mg, 0.22 mmol, quantitative yield).

**R<sub>f</sub>**: 0.29 (2:8, EtOAc:Petrol, UV active); **<sup>1</sup>H NMR** (400 MHz, CD<sub>3</sub>OD, for acetal)  $\delta$  = 7.76-7.66 (m, 2H, PhH<sub>6</sub>, PhH<sub>2</sub>), 7.37 (d,  $J$  = 8.0 Hz, 1H, PhH<sub>3</sub>), 5.45 (s, 1H, CH(OMe)<sub>2</sub>), 3.27-3.19 (m, 2H, CH<sub>2</sub>N), 1.53 (dt,  $J$  = 7.4 Hz, 2H, CH<sub>2</sub>CH<sub>3</sub>), 0.86 (t,  $J$  = 7.4 Hz, 3H, CH<sub>3</sub>); **<sup>13</sup>C NMR** (101 MHz, CD<sub>3</sub>OD, for acetal)  $\delta$  = 168.8 (CON), 144.3 (PhC<sub>4</sub>), 133.7 (PhC<sub>1</sub>), 133.0 (PhC<sub>6</sub>), 128.6 (PhC<sub>5</sub>), 126.9 (PhC<sub>2</sub>), 125.6 (PhC<sub>3</sub>), 102.3 (CH(OMe)<sub>2</sub>), 84.1 (C(CH<sub>3</sub>)<sub>2</sub>), 41.5 (CH<sub>2</sub>N), 23.7 (Pin), 22.4 (CH<sub>2</sub>CH<sub>3</sub>), 10.5 (CH<sub>3</sub>); **HRMS**:  $m/z$  (ESI<sup>+</sup>) calc. for C<sub>11</sub>H<sub>13</sub>BNO<sub>4</sub> [M-H]<sup>+</sup>: 234.0943; Obs.: 234.0945;  **$\nu_{\text{max}}$** : (FT-ATR)/cm<sup>-1</sup>: 3314, 2967, 2932, 1693, 1639, 1540, 1343, 1316, 1206, 1141, 1066, 964, 851, 813, 760.

## 6. Synthesis of nucleophiles for NMR and LC-MS studies, and FRET controls

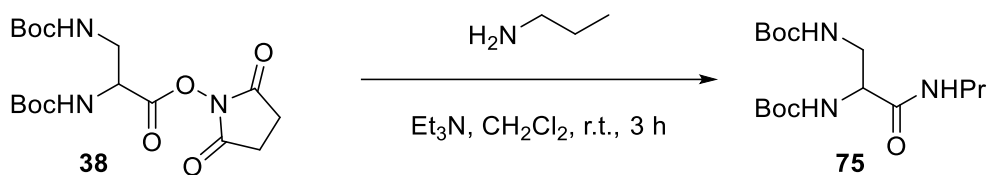

A mixture of **38** (154 mg, 0.38 mmol), propylamine (96  $\mu$ L, 1.15  $\mu$ mol), and triethylamine (266  $\mu$ L, 1.92 mmol) in dichloromethane (5 mL) was stirred at r.t. for 3 h. The reaction was then concentrated under reduced pressure. The residue was purified via flash column chromatography on silica gel, eluting with EtOAc:Petrol (2:8). Fractions containing the product were concentrated under reduced pressure to provide a colourless oil (35 mg, 0.10 mmol, 27%).

*R<sub>f</sub>*: 0.38 (3:7, EtOAc:Petrol); **<sup>1</sup>H NMR** (400 MHz, CDCl<sub>3</sub>)  $\delta$  = 6.72 (s, 1H, NHPr), 5.84 (s, 1H, BocNHCH), 5.26 (s, 1H, BocNHCH<sub>2</sub>), 4.16 (dt,  $J_1 = J_2 = 6.1$  Hz, 1H, CHNHBoc), 3.49-3.40 (m, 2H, CH<sub>2</sub>NHBoc), 3.22-3.15 (m, 2H, CH<sub>2</sub>CH<sub>2</sub>CH<sub>3</sub>), 1.49 (q,  $J = 7.5$  Hz, 2H, CH<sub>2</sub>CH<sub>3</sub>), 1.43-1.39 (m, 18H, 2  $\times$  Boc), 0.88 (s, 3H, CH<sub>3</sub>); **<sup>13</sup>C NMR** (101 MHz, CDCl<sub>3</sub>)  $\delta$  = 170.6 (CONH), 157.2 (COBoc), 156.3 (COBoc), 80.3 (C(CH<sub>3</sub>)<sub>3</sub>), 80.0 (C(CH<sub>3</sub>)<sub>3</sub>), 55.7 (CHNHBoc), 42.5 (CH<sub>2</sub>NHBoc), 41.2 (CH<sub>2</sub>CH<sub>2</sub>CH<sub>3</sub>), 28.4 (Boc), 28.4 (Boc), 22.8 (CH<sub>2</sub>CH<sub>3</sub>), 11.4 (CH<sub>3</sub>); **HRMS**:  $m/z$  (ESI<sup>+</sup>) calc. for C<sub>16</sub>H<sub>32</sub>N<sub>3</sub>O<sub>5</sub> [M+H]<sup>+</sup>: 346.2336; Obs.: 346.2335;  $\nu_{\text{max}}$ : (FT-ATR)/cm<sup>-1</sup>: 3330, 2975, 2933, 2876, 1690, 1654, 1518, 1365, 1249, 1163, 1078, 868, 780, 644.

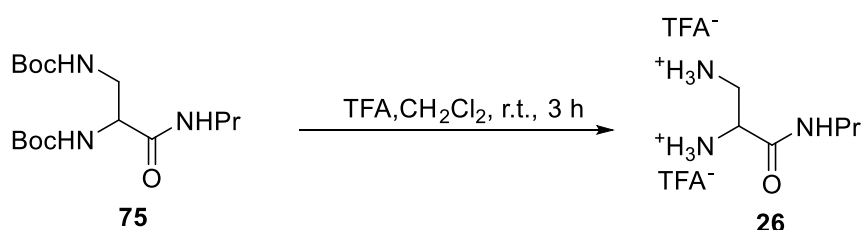

Trifluoroacetic acid (1 mL) was added dropwise to a stirred solution of **74** (30 mg, 87  $\mu$ mol) in dichloromethane (5 mL) and the solution was stirred at r.t. for 3 h. The reaction mixture was concentrated under reduced pressure and azeotroped with dichloromethane (4  $\times$  30 mL) to obtain a colourless oil. (13 mg, 87  $\mu$ mol, quantitative yield).

**R<sub>f</sub>**: 0.24 (3:7, EtOAc:Petrol); **<sup>1</sup>H NMR** (400 MHz, CD<sub>3</sub>OD)  $\delta$  = 4.21 (t,  $J$  = 7.2 Hz, 1H, CHCO), 3.47–3.26 (m, 3H, CH<sub>2</sub>NH, CONHCH<sub>2</sub>), 3.12 (dt,  $J$  = 13.7, 7.2 Hz, 1H, ONHCH<sub>2</sub>), 1.55 (tq,  $J_1$  =  $J_2$  = 7.4 Hz, 2H, CH<sub>2</sub>CH<sub>3</sub>), 0.93 (t,  $J$  = 7.4 Hz, 3H, CH<sub>3</sub>); **<sup>13</sup>C NMR** (101 MHz, CD<sub>3</sub>OD)  $\delta$  = 165.3 (CON), 50.8 (CHNH<sub>3</sub><sup>+</sup>), 41.5 (CONHCH<sub>2</sub>), 39.7 (CH<sub>2</sub>NH<sub>3</sub><sup>+</sup>), 21.9 (CH<sub>2</sub>CH<sub>3</sub>), 10.3 (CH<sub>3</sub>); **HRMS**:  $m/z$  (ESI<sup>+</sup>) calc. for C<sub>6</sub>H<sub>15</sub>N<sub>3</sub>O [M+H]<sup>+</sup>: 146.1288; Obs.: 146.1288;  **$\nu_{\text{max}}$** : (FT-ATR)/cm<sup>-1</sup>: 3287, 2968, 2938, 2879, 1649, 1553, 1462, 1200, 1136, 837, 800, 722.

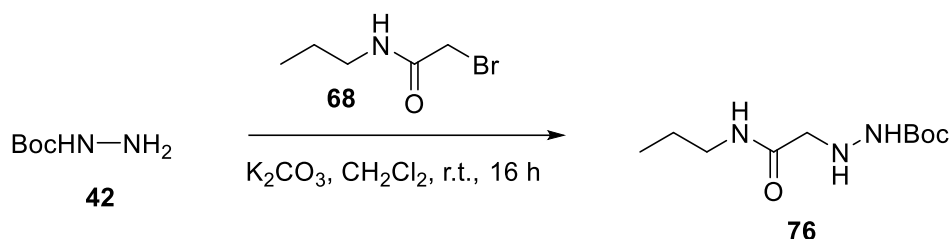

A mixture of **42** (371 mg, 2.81 mmol), **68** (603 mg, 3.37 mmol), and potassium carbonate (776 mg, 5.62 mmol) in dimethylformamide (5 mL) was stirred at 80 °C for 30 min. The mixture was then cooled to r.t. and diluted with water (50 mL). The aqueous was extracted with ethyl acetate (3 × 50 mL), and the combined organics washed with brine (2 × 30 mL), dried with MgSO<sub>4</sub>, filtered, and concentrated under reduced pressure. The residue was purified via flash column chromatography on silica gel eluting with EtOAc:Petrol (2:8). Fractions containing the product were concentrated under reduced pressure to provide a colourless oil (532 mg, 2.30 mmol, 82%).

**R<sub>f</sub>**: 0.36 (2:8, EtOAc:Petrol); **<sup>1</sup>H NMR** (400 MHz, CDCl<sub>3</sub>)  $\delta$  = 7.56 (s, 1H, NHPr), 6.40 (s, 1H, NHBoc), 4.19 (s, 1H, NHNHBoc), 3.46 (s, 2H, CH<sub>2</sub>CO), 3.20 (t,  $J$  = 7.4 Hz, 2H, CH<sub>2</sub>NH), 1.55–1.49 (m, 2H, CH<sub>2</sub>CH<sub>3</sub>), 1.41 (s, 9H, Boc), 0.90 (t,  $J$  = 7.4 Hz, 3H, CH<sub>3</sub>); **<sup>13</sup>C NMR** (101 MHz, CDCl<sub>3</sub>)  $\delta$  = 170.1 (CON), 156.8 (COBoc), 81.0 (C(CH<sub>3</sub>)<sub>3</sub>), 55.5 (CH<sub>2</sub>O), 41.0 (CH<sub>2</sub>NH), 28.3 (Boc), 22.8 (CH<sub>2</sub>CH<sub>3</sub>), 11.5 (CH<sub>3</sub>); **HRMS**:  $m/z$  (ESI<sup>+</sup>) calc. for C<sub>10</sub>H<sub>21</sub>N<sub>3</sub>O<sub>3</sub> [M+Na]<sup>+</sup>: 254.1475; Obs.: 254.1469;  **$\nu_{\text{max}}$** : (FT-ATR)/cm<sup>-1</sup>: 3298, 2969, 2934, 2877, 1714, 1650, 1545, 1460, 1367, 1282, 1250, 1159, 1046. 1022, 849, 754, 593.

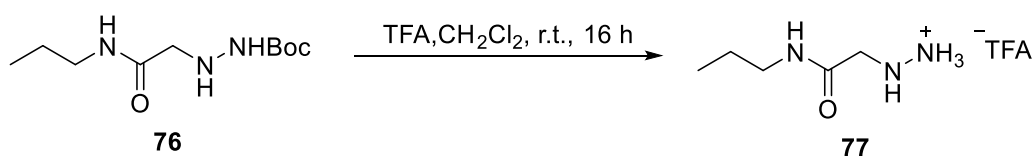

Trifluoroacetic acid (1 mL) was added dropwise to a stirred solution of **76** (70 mg, 0.142 mmol) in dichloromethane (5 mL), and the solution was stirred at r.t. for 16 h. The reaction mixture was then concentrated under reduced pressure and azeotroped with dichloromethane (4 × 30 mL) to obtain a colourless oil. (40 mg, 0.142 mmol, quantitative yield).

**R<sub>f</sub>**: 0.24 (2:8, EtOAc:Petrol); **<sup>1</sup>H NMR** (400 MHz, CD<sub>3</sub>OD) δ = 3.62 (s, 2H, CH<sub>2</sub>NHNH<sub>3</sub><sup>+</sup>), 3.16 (t, *J* = 7.3 Hz, 2H, CH<sub>2</sub>NHCO), 1.58-1.48 (m, 2H, CH<sub>2</sub>CH<sub>3</sub>), 0.91 (t, *J* = 7.3 Hz, 3H, CH<sub>3</sub>); **<sup>13</sup>C NMR** (101 MHz, CDCl<sub>3</sub>) δ = 168.8 (CON), 50.4 (CH<sub>2</sub>ONHNH<sub>3</sub><sup>+</sup>), 40.8 (CH<sub>2</sub>NH), 22.2 (CH<sub>2</sub>CH<sub>3</sub>), 10.3 (CH<sub>3</sub>); **HRMS**: *m/z* (ESI<sup>+</sup>) calc. for C<sub>5</sub>H<sub>13</sub>N<sub>3</sub>O [M+Na]<sup>+</sup>: 132.1131; Obs.: 132.1130; **ν<sub>max</sub>**: (FT-ATR)/cm<sup>-1</sup>: 3300, 2965, 2934, 2876, 1651, 1543, 1460, 1201, 1146, 721.

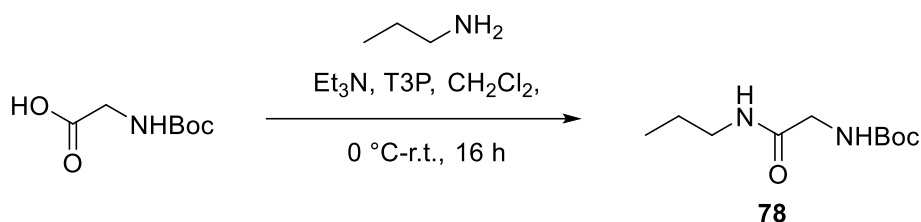

To a solution of Boc-Gly-OH (150 mg, 0.857 mmol), propylamine (178 μL, 2.14 mmol) and triethylamine (593 μL, 4.29 mmol) in dichloromethane (5 mL), was added propylphosphonic anhydride solution (50% w/w in EtOAc, 681 μL, 2.14 mmol) at 0 °C and the mixture stirred at r.t. for 16 h. The reaction was then concentrated under reduced pressure. The residue was purified via flash column chromatography on silica gel eluting with EtOAc:Petrol (2:8). Fractions containing the product were concentrated under reduced pressure to provide a colourless oil (132 mg, 0.71 mmol, 49%).

**R<sub>f</sub>**: 0.32 (2:8, EtOAc:Petrol); **<sup>1</sup>H NMR** (400 MHz, CDCl<sub>3</sub>) δ = 6.22 (s, 1H, NHCO), 5.21 (s, 1H, NHBoc), 3.75 (s, 2H, CH<sub>2</sub>CO), 3.21 (t, *J* = 7.2 Hz, 2H, CH<sub>2</sub>NH), 1.54-1.46 (m, 2H, CH<sub>2</sub>CH<sub>3</sub>), 1.43 (s, 9H, Boc), 0.90 (t, *J* = 7.2, 3H, CH<sub>3</sub>); **<sup>13</sup>C NMR** (101 MHz, CDCl<sub>3</sub>) δ = 169.5 (CON), 156.0 (COBoc), 80.4 (CH<sub>2</sub>O), 44.6 (C(CH<sub>3</sub>)<sub>3</sub>), 41.2 (CH<sub>2</sub>N), 28.4 (Boc), 22.8 (CH<sub>2</sub>CH<sub>3</sub>), 11.4 (CH<sub>3</sub>); **HRMS**: *m/z* (ESI<sup>+</sup>) calc. for C<sub>10</sub>H<sub>20</sub>N<sub>2</sub>O<sub>3</sub> [M+Na]<sup>+</sup>: 239.1366; Obs.: 239.1367; **ν<sub>max</sub>**: (FT-ATR)/cm<sup>-1</sup>: 3312, 2968, 2933, 2876, 1656, 1512, 1365, 1248, 1164, 1049, 940, 864, 735, 551, 462.

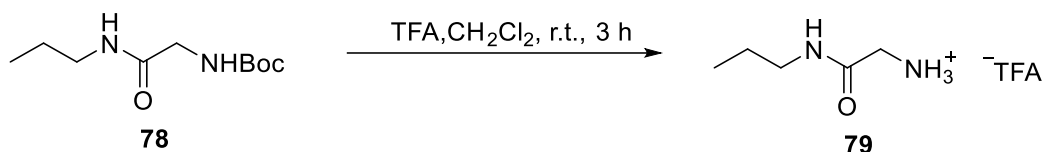

Trifluoroacetic acid (1 mL) was added dropwise to a stirred solution of **78** (90 mg, 0.42 mmol) in dichloromethane (5 mL) and the solution was stirred at r.t. for 3 h. The reaction mixture was concentrated under reduced pressure and azeotroped with dichloromethane (4 × 30 mL) to obtain a colourless oil. (48 mg, 0.42 mmol, quantitative yield).

**R<sub>f</sub>**: 0.32 (2:8, EtOAc:Petrol); **<sup>1</sup>H NMR** (400 MHz, CD<sub>3</sub>OD) δ = 8.29 (m, 1H, NH), 3.68 (s, 2H, CH<sub>2</sub>CO), 3.16 (t, *J* = 7.3 Hz, 2H, CH<sub>2</sub>NH), 1.51 (dt, *J*<sub>1</sub> = *J*<sub>2</sub> = 7.3 Hz, 2H, CH<sub>2</sub>CH<sub>3</sub>), 0.89 (t, *J* = 7.3 Hz, 3H, CH<sub>3</sub>); **<sup>13</sup>C NMR** (101 MHz, CD<sub>3</sub>OD) δ = 165.8 (CON), 41.0 (CH<sub>2</sub>O), 40.2 (CH<sub>2</sub>N), 22.8 (CH<sub>2</sub>CH<sub>3</sub>), 10.29 (CH<sub>3</sub>); **HRMS**: *m/z* (ESI<sup>+</sup>) calc. for C<sub>5</sub>H<sub>12</sub>N<sub>2</sub>O [M+H]<sup>+</sup>: 117.1022; Obs.: 117.1022; **ν<sub>max</sub>**: (FT-ATR)/cm<sup>-1</sup>: 3305, 2926, 1663, 1576, 1436, 1275, 1130, 840, 916, 798, 723, 518.

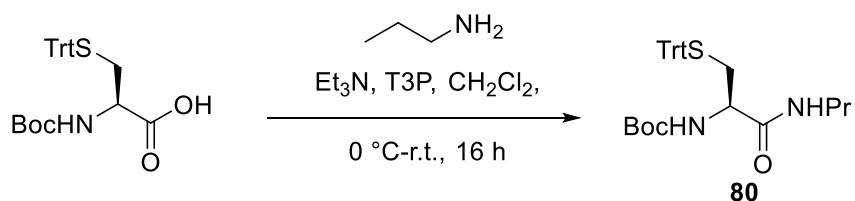

To a solution of Boc-Cys(Trt)-OH (200 mg, 0.431 mmol), propylamine (54 μL, 0.647 mmol), and triethylamine (300 μL, 2.16 mmol) in dichloromethane (5 mL), was added propylphosphonic anhydride solution (50% w/w in EtOAc, 343 μL, 1.08 mmol) at 0 °C and the mixture stirred at r.t. for 16 h. The reaction was then concentrated under reduced pressure. The residue was purified via flash column chromatography on silica gel eluting with EtOAc:Petrol (2:8). Fractions containing the product were concentrated under reduced pressure to provide a colourless oil (205 mg, 0.43 mmol, 99%).

**R<sub>f</sub>**: 0.29 (2:8, EtOAc:Petrol, UV active); **<sup>1</sup>H NMR** (400 MHz, CDCl<sub>3</sub>) δ = 7.44-7.38 (m, 6H, PhH<sub>2</sub>), 7.31-7.25 (m, 6H, PhH<sub>3</sub>), 7.23-7.18 (m, 3H, PhH<sub>4</sub>), 5.94 (s, 1H, NH<sub>Boc</sub>), 4.80-4.64 (m, 1H, NHPr), 3.80 (d, *J* = 6.4 Hz, 1H, CHNH<sub>Boc</sub>), 3.16-3.09 (m, 2H, CH<sub>2</sub>NH), 2.74-2.66 (m, 1H, CH<sub>2</sub>STrt), 2.53-2.45 (m, 1H, CH<sub>2</sub>STrt), 1.50-1.42 (m, 2H, CH<sub>2</sub>CH<sub>3</sub>), 1.40 (s, 9H, Boc), 0.86 (t, *J* = 7.4 Hz, 3H, CH<sub>3</sub>); **<sup>13</sup>C NMR** (101 MHz, CDCl<sub>3</sub>) δ = 170.4 (CON), 144.5 (COBoc), 129.7 (PhC<sub>2</sub>), 128.2 (PhC<sub>3</sub>), 127.0 (PhC<sub>4</sub>), 82.3 (CHNH<sub>Boc</sub>), 67.3 (CH<sub>2</sub>STrt), 41.3 (CH<sub>2</sub>NH), 28.4 (Boc), 22.8 (CH<sub>2</sub>CH<sub>3</sub>), 11.4 (CH<sub>3</sub>);

**HRMS:** m/z (ESI<sup>+</sup>) calc. for C<sub>30</sub>H<sub>36</sub>N<sub>2</sub>O<sub>3</sub>S [M+Na]<sup>+</sup>: 527.2335; Obs.: 527.2335; **v**<sub>max</sub>: (FT-ATR)/cm<sup>-1</sup>: 3300, 3058, 2967, 2931, 2875, 1655, 1526, 1489, 1366, 1248, 1165, 1047, 865, 739, 698, 621, 505.

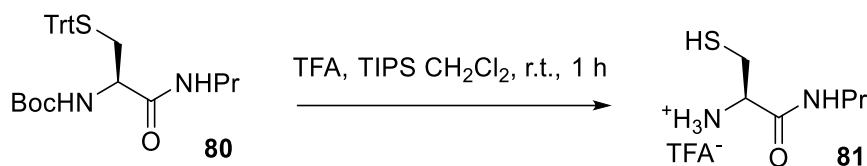

Trifluoroacetic acid (1 mL) was added dropwise to a stirred solution of **80** (195 mg, 0.41 mmol) and triisopropylsilane (439  $\mu$ L, 2.04 mmol) in dichloromethane (5 mL), and the mixture stirred at r.t. for 16 h. The reaction was then concentrated under reduced pressure to ~5 mL, and the remaining solution added dropwise to diethyl ether (200 mL). The resultant precipitate was collected by filtration, washed with diethyl ether (30 mL), and dried in air. The solid was then dissolved in methanol (10 mL) and concentrated under reduced pressure to afford a colourless oil. (67 mg, 0.41 mmol, quantitative yield).

**R**<sub>f</sub>: 0.18 (2:8, EtOAc:Petrol, UV active); **<sup>1</sup>H NMR** (400 MHz, CD<sub>3</sub>OD)  $\delta$  = 3.98-3.90 (m, 1H, CHNH<sub>3</sub><sup>+</sup>), 3.29-3.15 (m, 2H, CH<sub>2</sub>NH), 3.04-2.87 (m, 2H, CH<sub>2</sub>STrt), 1.59-1.48 (m, 2H, CH<sub>2</sub>CH<sub>3</sub>), 0.92 (t, *J* = 7.4 Hz, 3H, CH<sub>3</sub>); **<sup>13</sup>C NMR** (101 MHz, CD<sub>3</sub>OD)  $\delta$  = 166.9 (C=O), 54.8 (CHNH<sub>3</sub><sup>+</sup>), 41.2 (CH<sub>2</sub>NH), 25.0 (CH<sub>2</sub>SH), 22.1 (CH<sub>2</sub>CH<sub>3</sub>), 10.4 (CH<sub>3</sub>); **HRMS:** m/z (ESI<sup>+</sup>) calc. for C<sub>6</sub>H<sub>14</sub>N<sub>2</sub>OS [M+Na]<sup>+</sup>: 185.0719; Obs.: 185.0720; **v**<sub>max</sub>: (FT-ATR)/cm<sup>-1</sup>: 3286, 3090, 2966, 1655, 1571, 1265, 1181, 1133, 838, 798, 722, 517.

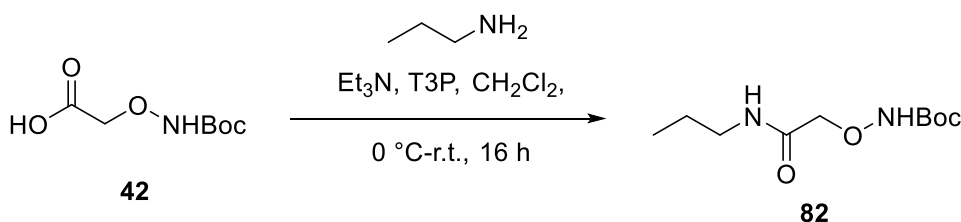

To a solution of **42** (115 mg, 0.602 mmol), propylamine (125  $\mu$ L, 1.51 mmol) and triethylamine (416  $\mu$ L, 3.01 mmol) in dichloromethane (5 mL), was added propylphosphonic anhydride solution (50% w/w in EtOAc, 479  $\mu$ L, 1.51 mmol) at 0 °C and the mixture was warmed to r.t. and stirred for 16 h. The reaction was then concentrated under reduced pressure. The residue was purified via flash column chromatography on silica gel eluting with EtOAc:Petrol (2:8). Fractions containing the

product were concentrated under reduced pressure to provide a colourless oil (65 mg, 0.28 mmol, 46%).

**R<sub>f</sub>**: 0.36 (2:8, EtOAc:Petrol); **<sup>1</sup>H NMR** (400 MHz, CDCl<sub>3</sub>) δ = 8.15 (s, 1H, NH), 4.24 (s, 2H, CH<sub>2</sub>O), 3.20 (t, *J* = 7.3 Hz, 2H, CH<sub>2</sub>NH), 1.51 (dt, *J* = 7.3 Hz, 2H, CH<sub>2</sub>CH<sub>3</sub>), 1.42 (s, 9H, Boc), 0.88 (t, *J* = 7.3 Hz, 3H, CH<sub>3</sub>); **<sup>13</sup>C NMR** (101 MHz, CDCl<sub>3</sub>) δ = 169.1 (CONH), 158.0 (COBoc), 82.8 (C(CH<sub>3</sub>)<sub>3</sub>), 76.1 (CH<sub>2</sub>CO), 40.9 (CH<sub>2</sub>NH), 28.2 (Boc), 22.6 (CH<sub>2</sub>CH<sub>3</sub>), 11.5 (CH<sub>3</sub>); **HRMS**: *m/z* (ESI<sup>+</sup>) calc. for C<sub>10</sub>H<sub>20</sub>N<sub>2</sub>O<sub>4</sub> [M+Na]<sup>+</sup>: 255.1315; Obs.: 255.1311; **ν<sub>max</sub>**: (FT-ATR)/cm<sup>-1</sup>: 3285, 2969, 2934, 2877, 1724, 1650, 1552, 1459, 1368, 1252, 1162, 1110, 776, 586.

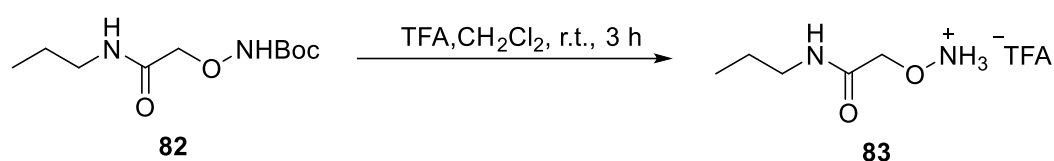

Trifluoroacetic acid (1 mL) was added dropwise to a stirred solution of **82** (60 mg, 0.26 mmol) in dichloromethane (5 mL) and the solution was stirred at r.t. for 3 h. The reaction mixture was concentrated under reduced pressure and azeotroped with dichloromethane (4 × 30 mL) to obtain a colourless oil. (34 mg, 0.26 mmol, quantitative yield).

**R<sub>f</sub>**: 0.27 (2:8, EtOAc:Petrol); **<sup>1</sup>H NMR** (400 MHz, CD<sub>3</sub>OD) δ = 4.20 (s, 2H, CH<sub>2</sub>CO), 2.92 (t, *J* = 7.4 Hz, 2H, CH<sub>2</sub>NH), 1.26 (dt, *J*<sub>1</sub> = *J*<sub>2</sub> = 7.4 Hz, 2H, CH<sub>2</sub>CH<sub>3</sub>), 0.64 (t, *J* = 7.4 Hz, 3H, CH<sub>3</sub>); **<sup>13</sup>C NMR** (101 MHz, CD<sub>3</sub>OD) δ = 168.5 (CONH), 71.4 (CH<sub>2</sub>CO), 40.6 (CH<sub>2</sub>NH), 22.2 (CH<sub>2</sub>CH<sub>3</sub>), 10.3 (CH<sub>3</sub>); **HRMS**: *m/z* (ESI<sup>+</sup>) calc. for C<sub>5</sub>H<sub>12</sub>N<sub>2</sub>O<sub>2</sub> [M+H]<sup>+</sup>: 133.0972; Obs.: 133.0967; **ν<sub>max</sub>**: (FT-ATR)/cm<sup>-1</sup>: 3288, 3089, 2966, 2877, 1654, 1544, 1460, 1201, 1084, 833, 580.

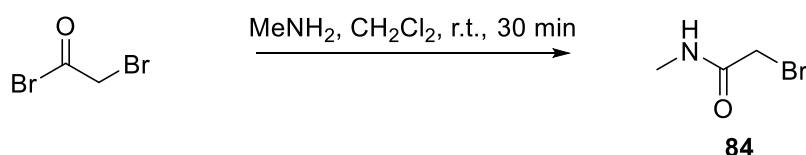

Methylamine (1.00 mL, 22.6 mmol) was added to a solution of bromoacetyl bromide (1.00 mL, 11.3 mmol) in dichloromethane (30 mL) and stirred at r.t. for 30 min. The mixture was then diluted with water (70 mL) and the aqueous was extracted with ethyl acetate (3 × 70 mL). The combined organics were washed with brine (2 × 100 mL),

dried with MgSO<sub>4</sub>, filtered, and concentrated under reduced pressure to provide a colourless oil (1.56 g, 1.03 mmol, 91%).

**R<sub>f</sub>**: 0.29 (2:8, EtOAc:Petrol); **<sup>1</sup>H NMR** (400 MHz, CDCl<sub>3</sub>) δ = 3.80 (s, 2H, CH<sub>2</sub>), 3.73 (s, 3H, CH<sub>3</sub>); **<sup>13</sup>C NMR** (101 MHz, CDCl<sub>3</sub>) δ = 167.8 (CON), 53.2 (CH<sub>2</sub>), 25.7 (CH<sub>3</sub>); **HRMS**: m/z (ESI<sup>+</sup>) calc. for C<sub>3</sub>H<sub>6</sub>NO [M+Na]<sup>+</sup>: 193.9525; Obs.: 193.9525; **v<sub>max</sub>**: (FT-ATR)/cm<sup>-1</sup>: 2956, 1736, 1437, 1280, 1165, 1113, 1006, 884, 708, 670, 549.

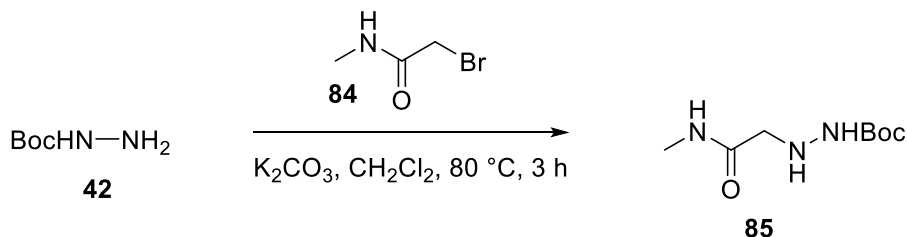

A mixture of **42** (500 mg, 3.79 mmol), **84** (732 mg, 4.55 mmol), and potassium carbonate (1.05 g, 7.58 mmol) in dimethylformamide (10 mL) was stirred at 80 °C for 3 h. The mixture was then cooled to r.t. and diluted with water (70 mL). The aqueous was extracted with ethyl acetate (3 × 50 mL), and the combined organics washed with brine (2 × 50 mL), dried with MgSO<sub>4</sub>, filtered, and concentrated under reduced pressure. The residue was purified via flash column chromatography on silica gel, eluting with EtOAc:Petrol (2:8). Fractions containing the product were concentrated under reduced pressure to provide a colourless oil (50 mg, 0.25 mmol, 6%).

**R<sub>f</sub>**: 0.26 (2:8, EtOAc:Petrol); **<sup>1</sup>H NMR** (400 MHz, CDCl<sub>3</sub>, data provided for major rotamer) δ = 6.53 (s, 1H, NHMe), 3.78-3.68 (m, 3H, CH<sub>3</sub>), 3.60 (s, 2H, CH<sub>2</sub>), 1.40 (s, 9H, Boc); **<sup>13</sup>C NMR** (101 MHz, CDCl<sub>3</sub>, data provided for major rotamer) δ = 171.9 (CON), 162.9 (COBoc), 81.0 (C(CH<sub>3</sub>)<sub>3</sub>), 53.0 (CH<sub>2</sub>), 52.2 (CH<sub>3</sub>), 28.6 (C(CH<sub>3</sub>)<sub>3</sub>); **HRMS**: Product was not observed via HRMS; **v<sub>max</sub>**: (FT-ATR)/cm<sup>-1</sup>: 3320, 2978, 1714, 1438, 1367, 1209, 1149, 1049, 1017, 779.

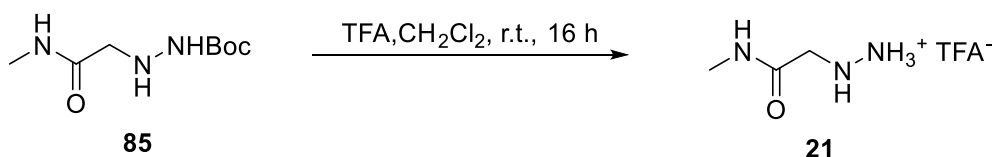

Trifluoroacetic acid (1 mL) was added dropwise to a stirred solution of **84** (43 mg, 0.21 mmol) in dichloromethane (5 mL) and the solution was stirred at r.t. for 16 h. The reaction mixture was then concentrated under reduced pressure and azeotroped with

dichloromethane (4 × 30 mL) to obtain a colourless oil (22 mg, 0.21 mmol, quantitative yield).

**R<sub>f</sub>**: 0.18 (2:8, EtOAc:Petrol); **<sup>1</sup>H NMR** (400 MHz, CD<sub>3</sub>OD) δ = 3.82-3.76 (m, 2H, CH<sub>2</sub>), 3.78-3.70 (m, 3H, CH<sub>3</sub>); **<sup>13</sup>C NMR** (101 MHz, CD<sub>3</sub>OD) δ = 171.8 (CON), 52.9 (CH<sub>2</sub>), 50.6 (CH<sub>3</sub>); **HRMS**: Product was not observed via HRMS; **ν<sub>max</sub>**: (FT-ATR)/cm<sup>-1</sup>: 2959, 1730, 1438, 1205, 1154, 1047, 1005, 907, 761.

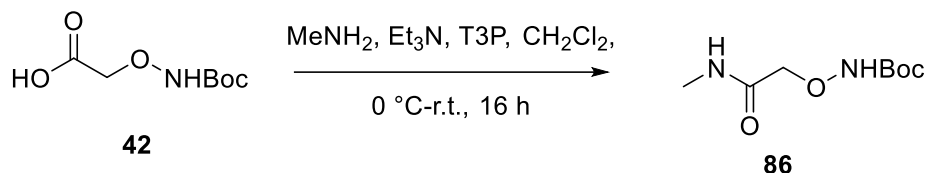

To a solution of **42** (300 mg, 1.57 mmol), methylamine (140 μL, 3.14 mmol), and triethylamine (1.09 mL, 7.85 mmol) in dichloromethane (5 mL), was added propylphosphonic anhydride solution (50% w/w in EtOAc, 1.25 mL, 3.93 mmol) at 0 °C, and the mixture was then stirred at r.t. for 16 h. The reaction was concentrated under reduced pressure and the residue was purified via flash column chromatography on silica gel eluting with EtOAc:Petrol (2:8). Fractions containing the product were concentrated under reduced pressure to provide a white solid (145 mg, 0.71 mmol, 45%).

**R<sub>f</sub>**: 0.31 (2:8, EtOAc:Petrol); **<sup>1</sup>H NMR** (400 MHz, CDCl<sub>3</sub>) δ = 8.03 (s, 1H, NH<sub>Boc</sub>), 7.60 (s, 1H, NHMe), 4.33 (s, 2H, CH<sub>2</sub>), 2.86 (s, 3H, CH<sub>3</sub>), 1.48 (s, 9H, Boc); **<sup>13</sup>C NMR** (101 MHz, CDCl<sub>3</sub>) δ = 169.4 (CONH), 157.9 (COBoc), 83.4 (C(CH<sub>3</sub>)<sub>3</sub>), 76.6 (CH<sub>2</sub>CO), 28.2 (C(CH<sub>3</sub>)<sub>3</sub>), 25.8 (CH<sub>3</sub>); **HRMS**: m/z (ESI<sup>+</sup>) calc. for C<sub>8</sub>H<sub>16</sub>N<sub>2</sub>O<sub>4</sub> [M+Na]<sup>+</sup>: 227.1002; Obs.: 227.1008; **ν<sub>max</sub>**: (FT-ATR)/cm<sup>-1</sup>: 3287, 2979, 2939, 1723, 1658, 1559, 1480, 1369, 1280, 1253, 1163, 1112, 977, 583.

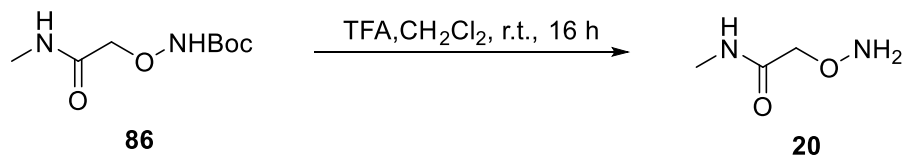

Trifluoroacetic acid (1 mL) was added dropwise to a stirred solution of **86** (60 mg, 0.26 mmol) in dichloromethane (5 mL) and stirred at r.t. for 3 h. The reaction mixture was concentrated under reduced pressure and azeotroped with dichloromethane (4 × 30 mL) to obtain a colourless oil. (34 mg, 0.26 mmol, quantitative yield).

**R<sub>f</sub>**: 0.22 (2:8, EtOAc:Petrol); **<sup>1</sup>H NMR** (400 MHz, CD<sub>3</sub>OD)  $\delta$  = 4.50 (s, 2H, CH<sub>2</sub>), 2.80 (s, 3H, CH<sub>3</sub>); **<sup>13</sup>C NMR** (101 MHz, CD<sub>3</sub>OD)  $\delta$  = 170.1 (C=O), 72.7 (CH<sub>2</sub>), 25.9 (CH<sub>3</sub>); **HRMS**: m/z (ESI<sup>+</sup>) calc. for C<sub>3</sub>H<sub>8</sub>N<sub>2</sub>O<sub>2</sub> [M+H]<sup>+</sup>: 105.0659; Obs.: 105.0652;  **$\nu_{\text{max}}$** : (FT-ATR)/cm<sup>-1</sup>: 3313, 2924, 1654, 1553, 1414, 1199, 1135, 1085, 834, 800, 722, 577.

## 7. Determination of substrate concentration via UV-Vis analysis

Due to the low amounts of Cy3 and Cy5 substrates synthesised, and the potential for errors in mass calculations that could result, the concentrations of stock solutions of each substrate were calculated from a calibration curve of **1** or **2** of known concentrations. Briefly, stock dilutions of **1** or **2** were made in water to concentrations in the range of 0.1-400  $\mu\text{M}$  (at least 6 data points). Absorbance spectra were then recorded in the range 400-600 nm, and the absorbance at the  $\lambda_{\text{max}}$  plotted as a function of concentration (Cy3: 543 nm; Cy5: 641 nm).

Aliquots of each substrate were then serially diluted in water to generate samples for measurement. Concentrations were then determined for appropriately dilute samples for which absorbance at  $\lambda_{\text{max}}$  fell within the linear range of the calibration curves.

## 8. Initial screening of Cy3 quenching

**General procedure:** A solution of Cy5-nucleophile (50  $\mu\text{L}$ , 100  $\mu\text{M}$ ) in PBS buffer was added to a solution Cy3-oBA **5** (50  $\mu\text{L}$ , 10  $\mu\text{M}$ ) in PBS buffer in a 96-well plate, to give final Cy3 and Cy5 concentrations of 5  $\mu\text{M}$  and 50  $\mu\text{M}$  respectively (pseudo-first order). Single-point fluorescence emission intensities ( $\lambda_{\text{excitation}}$  = 480 nm;  $\lambda_{\text{emission}}$  = 580 nm) in the Cy3 channel were then recorded every 1 min for a period of 100 min.

**Negative control:** Run as for the general procedure, using Cy5-NHAc **16** (50  $\mu\text{L}$ , 100  $\mu\text{M}$ )

**Positive control:** The emission of a solution of Cy3-Cy5 covalent control **17** (100  $\mu\text{L}$ , 5  $\mu\text{M}$ ) was recorded over time as described above.

**Data processing:** Emission at 580 nm was plotted as a function of time, relative to the negative (100%) and positive (0%) controls.

**Cy3 controls:** Run as for the general procedure, using either Cy3-benzaldehyde **61** or Cy3-phenylboronic acid **67** (50  $\mu$ L, 10  $\mu$ M).

**Controls to validate quenching via FRET:** Run as for the general procedure, using PrNH-capped nucleophiles **26**, **77**, **79**, **81**, or **83** (50  $\mu$ L, 100  $\mu$ M) in place of the Cy5-nucleophile.

## 9. FRET studies

**General procedure:** FRET studies were performed in a 700  $\mu$ L fluorescence cuvette under second-order conditions. A solution of Cy5-nucleophile (300  $\mu$ L, 5  $\mu$ M) in the stated buffer was added to a solution of Cy3-oBA **5** (300  $\mu$ L, 5  $\mu$ M) in the same buffer and rapidly mixed by pipetting up and down. Fluorescence emission spectra between 520-700 nm were recorded immediately after mixing, and then subsequently ever 15 seconds for a total of 100 measurements. The delay between mixing and the measurement of the first spectra was ~3 seconds. All measurements were performed in triplicate.

**Negative control:** Run as for the general procedure, using Cy5-NHAc **16** (300  $\mu$ L, 5  $\mu$ M).

**Positive control:** The emission of a solution of Cy3-Cy5 covalent control **17** (600  $\mu$ L, 2.5  $\mu$ M) was recorded over time as described above.

**Data processing:** The ratio of the emission at the  $\lambda_{\text{max}}$  of Cy3 ( $\text{Emiss}_{560}$ ) and Cy5 ( $\text{Emiss}_{657}$ ) was used to determine the FRET ratio ( $\text{Emiss}_{560}/\text{Emiss}_{657}$ ). As the initial spectra were recorded at  $t = 3$  sec, a plot of  $1/[\text{Emiss}_{560/657}]$  against time and linear regression analysis was used to determine  $\text{Emiss}_{560/657}$  at  $t = 0$  (intercept of linear regression). A minimum of 4 data points that lay within the initial linear region of this plot were included in this analysis.  $\text{Emiss}_{700}$  was used as a background measurement and subtracted from  $\text{Emiss}_{560/657}$  prior to analysis.

**Conversion of FRET ratios to conversion:** Data from the positive and negative controls was used to account for drift in the system and to calculate the expected FRET ratio for 0% and 100% conjugation at  $t = x$ , averaged across three triplicates:

i) *0% conjugation*: Changes in  $E_{560/657}$  from the negative control over the period of the measurement were fitted to a linear regression analysis, generating the gradients of drift  $a_{560/657}$ . The 0% conjugation FRET reference,  $A$ , then equals:

$$A = \frac{{}^0E_{560} + (a_{560} \times x)}{{}^0E_{657} + (a_{657} \times x)}$$

ii) *100% conjugation*: Changes in  $E_{560/657}$  from the positive control over the period of the measurement were fitted to a linear regression analysis, generating the gradients of drift  $b_{560/657}$  and the emissions at  $t = 0$ ,  ${}^0c_{560/657}$ . The 100% conjugation FRET reference,  $B$ , then equals:

$$B = \frac{{}^0c_{560} + (b_{560} \times x)}{{}^0c_{657} + (b_{657} \times x)}$$

Conversion can then be calculated from:

$$Conversion = \frac{A - FRET}{A - B} \times 100$$

Conversions over time were then averaged over the three triplicates and standard deviations at each time point calculated

**Data fitting:** Data were fit to a second order reversible kinetic model in Copasi 4.34.251.  $k_1$  and  $k_{-1}$  were estimated using the evolutionary programming method built into the software, with 200 generations and a population size of 20. Parameters were restricted within the confines of:  $k_1$   $10^{-6}$ - $10^7$   $M^{-1} s^{-1}$ ;  $k_{-1}$   $10^{-8}$ - $10^3$   $s^{-1}$ .

## 10. LC-MS reversibility studies

**General procedure:** Stock solutions of **25** (3  $\mu$ L, 38 mM, 114 nmol) and propyl amide nucleophile **83** or **77** (6  $\mu$ L, 38 mM, 228 nmol) in methanol were added sequentially to the relevant buffer (300  $\mu$ L, final oBA concentration 370  $\mu$ M) and shaken for 30 min. At this point, a stock solution of the analogous methyl amide nucleophile **20** or **21** (30  $\mu$ L, 38 mM, 1140 nmol) was added and the mixture incubated at room temperature. Aliquots were analysed via LC-MS analysis every 24 h for 1 week.

**Negative control:** Run as described above, but methanol (30  $\mu$ L) was added in place of the methyl amide nucleophile.

**Positive control:** Run as described above, but methanol (6  $\mu\text{L}$ ) was added in place of the propyl amide nucleophile.

**Data analysis:** The absorbance at 280 nm at time  $t = x$  ( $A_x$ ) was integrated for peaks relating to propyl-oBID (elution time: 2.90 min) products. A plot of  $\ln(\text{Integration})$  was used to determine the integration at  $t = 0$  (intercept of linear regression). Data from the positive controls was used to calculate the expected integration at 100% exchange ( $B$ ). Conversions were then calculated from:

$$\text{Conversion} = \frac{A_0 - A_x}{A_0 - B} \times 100$$

**Data fitting:** Data were fit to a two-reaction reversible kinetic model using Copasi 4.34.251, based on the following reactions:

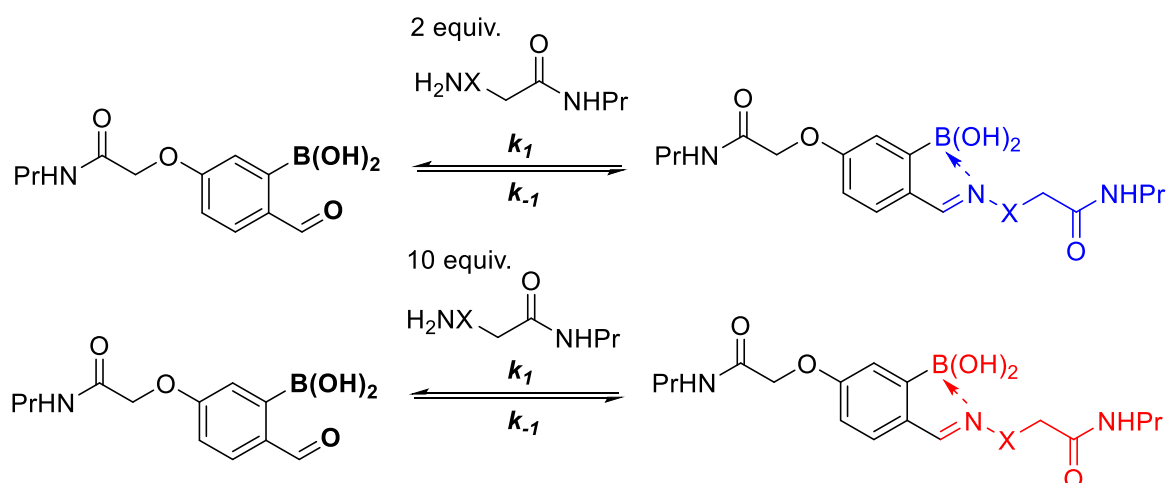

$k_1$  calculated from the FRET studies were used to estimate  $k_{-1}$ , using the evolutionary programming method built into the software, with 200 generations and a population size of 20, and with the assumption that rates of reactions were the same for propyl- and methyl-amide nucleophiles. Parameters were restricted within the confines of:  $k_{-1}$   $10^{-10}$ - $10^{-1}$   $\text{s}^{-1}$ .

## 11. NMR studies of pH dependent DAB-hydrazone exchange

Solutions of oBA **25** (5 mg, 19  $\mu\text{mol}$ ) in  $\text{DMSO}-d_6$  (25  $\mu\text{L}$ ) and propyl-amide hydrazine **77** (4.6 mg, 19  $\mu\text{mol}$ ) in  $\text{DMSO}-d_6$  were added sequentially to deuterated buffers (450  $\mu\text{L}$ , 100 mM; pH 4 – acetate buffer, pH 5, 6, 7.4, 8 – phosphate buffer; prepared by evaporating standard buffer and then redissolving the residue in  $\text{D}_2\text{O}$  three times) and

incubated for 30 min. The sample was then analysed by NMR and the ratio of DAB to hydrazone determined. In all cases, only signals from the cyclic DAB were observed, indicated by a singlet at  $\delta \sim 8.6$ , as previously reported by Gu *et al.*<sup>11</sup>

## 12. NMR studies of sugar binding

Solutions of oBA **25** (2.5 mg, 9  $\mu$ mol) in DMSO-*d*<sub>6</sub> (25  $\mu$ L) and either propyl-amide hydrazine **77** or hydroxylamine **83** (9  $\mu$ mol) in DMSO-*d*<sub>6</sub> were added sequentially to deuterated PBS (450  $\mu$ L, 100 mM; prepared by evaporating standard buffer and then redissolving the residue in D<sub>2</sub>O three times) and incubated for 30 min. Glucose or fructose (9  $\mu$ mol) was then added and the samples incubated for a further 30 min. After this time the samples were analysed by NMR and shifts in the oxime/DAB peaks used to determine the extent of sugar binding. In all cases, no shift in signal was observed indicating no sugar binding was taking place under these conditions.

## 13. NMR studies of analogue reaction equilibria

**General procedure:** oBA **25** (2 mg, 7.5  $\mu$ mol) and another oBA analogue, **22-24** (7.5  $\mu$ mol), were dissolved in a mixture of deuterated PBS (0.5 mL, 100 mM; prepared by evaporating standard PBS and then redissolving the residue in D<sub>2</sub>O three times) and DMSO-*d*<sub>6</sub> (50  $\mu$ L). A solution of 1,2-diamine **26** (1.1 mg, 7.5  $\mu$ mol) in deuterated PBS (0.5 mL) was then added and the mixture incubated for 2 hrs, prior to NMR analysis.

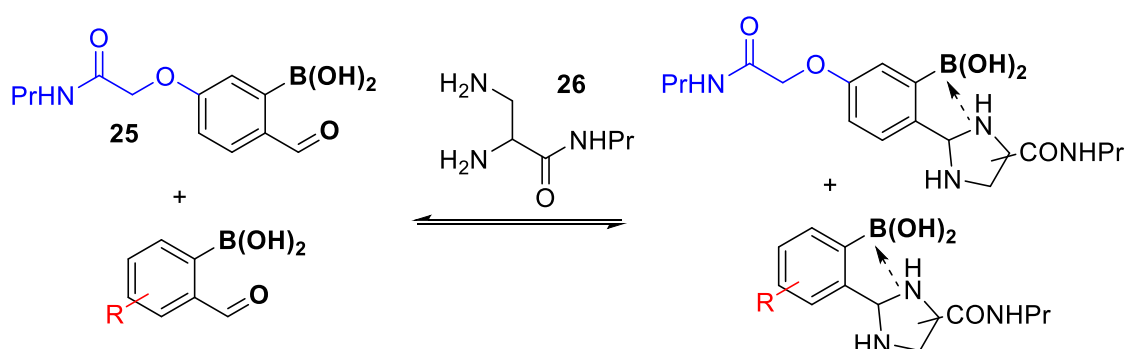

**Data analysis:** Peaks relating to oBID formation for both **25** and the oBA analogue competitor were identified via prior control reactions in which each oBA was incubated with **26** alone. Integration of peaks that fell within unique regions of the spectra relating

to oBID formation were used to determine the ratio of products formed. This ratio was then used to calculate  $K_d$  for each analogue, as follows:

$$K_d(\mathbf{25}) = \frac{[\mathbf{A}][\mathbf{B}]}{[\mathbf{C}]} \quad K_d(\mathbf{X}) = \frac{[\mathbf{D}][\mathbf{B}]}{[\mathbf{E}]}$$

Assuming  $K_d(\mathbf{25}) = K_d(\mathbf{5})$ , which is known from our FRET studies, these equations can be rearranged to:

$$[\mathbf{B}] = \frac{[\mathbf{C}]K_d(\mathbf{5})}{[\mathbf{A}]} \quad K_d(\mathbf{X}) = \frac{[\mathbf{D}][\mathbf{C}]}{[\mathbf{E}][\mathbf{A}]} K_d(\mathbf{5})$$

## 14. DFT

Calculations were performed to identify the relative energies of the imidazolidino-boronates **91-95** formed between model substrates **87-90** and ethylenediamine. The relative energies of intermediates and transition states were determined using the TURBOMOLE V6.4 package using the resolution of identity (RI) approximation.<sup>12-19</sup> Initial optimisations were performed at the (RI-)BP86/SV(P) level, followed by frequency calculations at the same level. All minima were confirmed as such by the absence of imaginary frequencies. Single-point energies were then performed on the (RI-)BP86/SV(P) optimised geometries using the hybrid PBE0 functional and the flexible def2-TZVPP basis set. Energies, xyz coordinates and the first 50 lines of the vibrational spectra are presented. Solvation effects were modelled using COMSO<sup>20</sup> using the dielectric constant of 78.2 for water and energies were corrected for dispersion using Grimme's D3-method with Becke-Johnson dampening.<sup>21</sup>

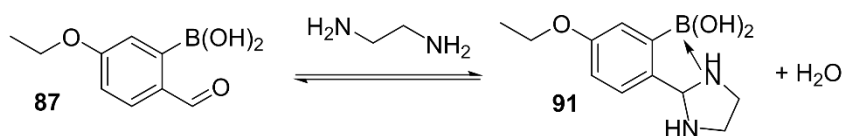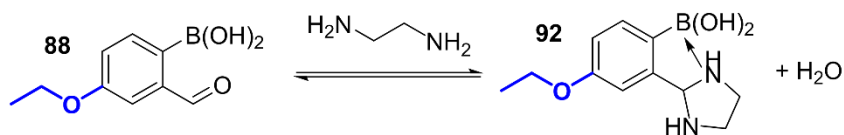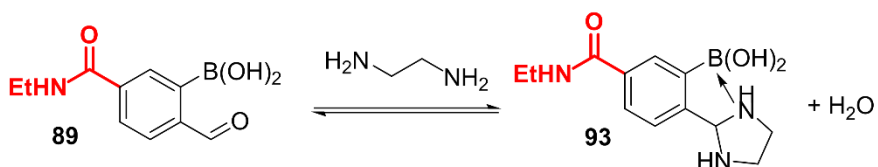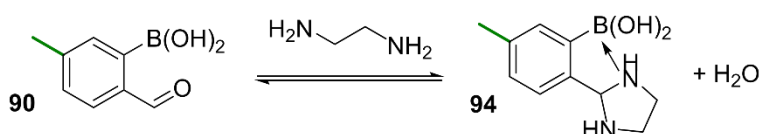

Differences in energy between aldehydes **88-90** and imidazolidino-boronates **92-94**, relative to the energy difference between aldehyde **87** and imidazolidino-boronate **91**.

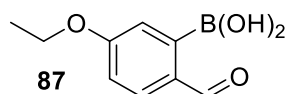

SCF Energy (au)BP86/SV(P) -674.9440225343  
 SCF Energy (au)PBE0/def2-TZVPP -674.9308469654  
 SCF Energy (au)PBE0/def2-TZVPP -674.9532019095 (H<sub>2</sub>O Correction)  
 Zero Point Energy (au) 0.1888044  
 Chemical Potential (kJ mol<sup>-1</sup>) 386.35  
 Dispersion Correction (au) PBE0/def2-TZVPP -0.02324058

xyz coordinates

Energy = -674.9440225343

|   |            |            |            |
|---|------------|------------|------------|
| O | 0.1229231  | 0.2566308  | 2.2691099  |
| C | -0.3831042 | 0.2529079  | 1.0117610  |
| C | -1.7247219 | 0.6933151  | 0.8880434  |
| H | -2.2607038 | 1.0042750  | 1.7982604  |
| C | -2.3279417 | 0.7147554  | -0.3673593 |
| H | -3.3758318 | 1.0485868  | -0.4677091 |
| C | -1.6123663 | 0.3084333  | -1.5190090 |
| C | -2.2472719 | 0.3208490  | -2.8451379 |
| C | -0.2648622 | -0.1323970 | -1.4130654 |
| C | 0.3340958  | -0.1565716 | -0.1407737 |
| H | 1.3725067  | -0.5090888 | -0.0449698 |
| C | 1.4652611  | -0.1905523 | 2.4973762  |
| C | 1.7428751  | -0.0918841 | 3.9895334  |
| H | 2.1752183  | 0.4442802  | 1.9157179  |
| H | 1.5757650  | -1.2413014 | 2.1387234  |

|   |            |            |            |
|---|------------|------------|------------|
| B | 0.5657355  | -0.5979504 | -2.6935615 |
| O | 1.3233065  | 0.2628537  | -3.4641737 |
| O | 0.7193913  | -1.9454335 | -2.8970460 |
| H | 1.2582170  | -2.0933026 | -3.7054397 |
| H | 1.0912610  | 1.2007071  | -3.3093381 |
| H | 1.6343672  | 0.9559426  | 4.3428952  |
| H | 2.7789774  | -0.4302677 | 4.2062575  |
| H | 1.0376194  | -0.7290728 | 4.5649349  |
| H | -3.3268260 | 0.6586063  | -2.8730183 |
| O | -1.6738907 | -0.0043208 | -3.8820117 |

\$vibrational spectrum

| #  | mode | symmetry | wave number<br>cm**(-1) | IR intensity<br>km/mol | selection rules<br>IR | RAMAN |
|----|------|----------|-------------------------|------------------------|-----------------------|-------|
| #  |      |          |                         |                        |                       |       |
| 1  |      |          | 0.00                    | 0.00000                | -                     | -     |
| 2  |      |          | 0.00                    | 0.00000                | -                     | -     |
| 3  |      |          | 0.00                    | 0.00000                | -                     | -     |
| 4  |      |          | 0.00                    | 0.00000                | -                     | -     |
| 5  |      |          | 0.00                    | 0.00000                | -                     | -     |
| 6  |      |          | 0.00                    | 0.00000                | -                     | -     |
| 7  |      | a        | 32.60                   | 0.29671                | YES                   | YES   |
| 8  |      | a        | 59.47                   | 0.14740                | YES                   | YES   |
| 9  |      | a        | 85.73                   | 1.16228                | YES                   | YES   |
| 10 |      | a        | 103.79                  | 0.56832                | YES                   | YES   |
| 11 |      | a        | 116.68                  | 5.39791                | YES                   | YES   |
| 12 |      | a        | 122.86                  | 3.87764                | YES                   | YES   |
| 13 |      | a        | 137.78                  | 10.50889               | YES                   | YES   |
| 14 |      | a        | 213.73                  | 2.31304                | YES                   | YES   |
| 15 |      | a        | 217.02                  | 3.50938                | YES                   | YES   |
| 16 |      | a        | 261.80                  | 0.16675                | YES                   | YES   |
| 17 |      | a        | 280.86                  | 4.72200                | YES                   | YES   |
| 18 |      | a        | 290.73                  | 2.40361                | YES                   | YES   |
| 19 |      | a        | 319.04                  | 2.92983                | YES                   | YES   |
| 20 |      | a        | 359.36                  | 7.26941                | YES                   | YES   |
| 21 |      | a        | 401.72                  | 1.43017                | YES                   | YES   |
| 22 |      | a        | 455.23                  | 68.91350               | YES                   | YES   |
| 23 |      | a        | 466.39                  | 35.73710               | YES                   | YES   |
| 24 |      | a        | 493.82                  | 13.51565               | YES                   | YES   |
| 25 |      | a        | 544.15                  | 21.64311               | YES                   | YES   |
| 26 |      | a        | 554.12                  | 21.30955               | YES                   | YES   |
| 27 |      | a        | 617.06                  | 8.35809                | YES                   | YES   |
| 28 |      | a        | 624.34                  | 30.34825               | YES                   | YES   |
| 29 |      | a        | 632.83                  | 67.02284               | YES                   | YES   |
| 30 |      | a        | 686.74                  | 5.27673                | YES                   | YES   |
| 31 |      | a        | 735.21                  | 1.98373                | YES                   | YES   |
| 32 |      | a        | 811.49                  | 36.01370               | YES                   | YES   |
| 33 |      | a        | 813.08                  | 0.11214                | YES                   | YES   |
| 34 |      | a        | 817.54                  | 23.26148               | YES                   | YES   |
| 35 |      | a        | 867.51                  | 13.75104               | YES                   | YES   |
| 36 |      | a        | 876.10                  | 4.05614                | YES                   | YES   |
| 37 |      | a        | 937.92                  | 21.01572               | YES                   | YES   |
| 38 |      | a        | 943.69                  | 0.37931                | YES                   | YES   |
| 39 |      | a        | 968.15                  | 134.73842              | YES                   | YES   |
| 40 |      | a        | 985.95                  | 0.63291                | YES                   | YES   |
| 41 |      | a        | 1003.86                 | 138.29590              | YES                   | YES   |
| 42 |      | a        | 1041.32                 | 18.16669               | YES                   | YES   |
| 43 |      | a        | 1057.69                 | 143.17251              | YES                   | YES   |
| 44 |      | a        | 1106.83                 | 18.69413               | YES                   | YES   |
| 45 |      | a        | 1113.53                 | 11.41937               | YES                   | YES   |

|    |   |         |           |     |     |
|----|---|---------|-----------|-----|-----|
| 46 | a | 1142.58 | 3.88275   | YES | YES |
| 47 | a | 1211.72 | 84.69479  | YES | YES |
| 48 | a | 1244.38 | 63.71511  | YES | YES |
| 49 | a | 1266.50 | 2.30874   | YES | YES |
| 50 | a | 1276.66 | 353.78756 | YES | YES |

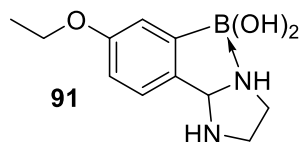

SCF Energy (au)BP86/SV(P) -788.9406342711  
 SCF Energy (au)PBE0/def2-TZVPP -788.9253276879  
 SCF Energy (au)PBE0/def2-TZVPP -788.9473947863 (H<sub>2</sub>O Correction)  
 Zero Point Energy (au) 0.2758400  
 Chemical Potential (kJ mol<sup>-1</sup>) 603.64  
 Dispersion Correction (au) PBE0/def2-TZVPP -0.03331502

xyz coordinates

34

|   |            |            |            |
|---|------------|------------|------------|
| O | 0.9899580  | -0.0449146 | 3.3529898  |
| C | 0.4667609  | -0.1027417 | 2.0925335  |
| C | -0.8984918 | 0.2339073  | 1.9683906  |
| H | -1.4525093 | 0.5217452  | 2.8763760  |
| C | -1.5185551 | 0.1976461  | 0.7144989  |
| H | -2.5810070 | 0.4666748  | 0.5975692  |
| C | -0.8066750 | -0.1839085 | -0.4392565 |
| C | -1.4717173 | -0.1617649 | -1.8098950 |
| C | 0.5640050  | -0.5310371 | -0.3327214 |
| C | 1.1896539  | -0.4712039 | 0.9370550  |
| H | 2.2543873  | -0.7437827 | 1.0181176  |
| N | -2.9288865 | 0.1600810  | -1.7913571 |
| N | -0.8367965 | 0.8554651  | -2.6638820 |
| C | -1.8581630 | 1.1625053  | -3.6741741 |
| H | -1.8344296 | 0.3713715  | -4.4588992 |
| H | -1.6531834 | 2.1381534  | -4.1639778 |
| C | 2.3556563  | -0.4001573 | 3.5558619  |
| C | 2.6573487  | -0.2780990 | 5.0427110  |
| H | 3.0187859  | 0.2752676  | 2.9611927  |
| H | 2.5357294  | -1.4436400 | 3.1994127  |
| B | 1.4453406  | -0.9639174 | -1.5728429 |
| O | 2.6967897  | -0.4186876 | -1.7997094 |
| O | 1.0418140  | -1.9838088 | -2.3996487 |
| H | 1.7071870  | -2.1138094 | -3.1109314 |
| H | 2.8643027  | 0.3329171  | -1.1944079 |
| C | -3.1939919 | 1.1114965  | -2.8896169 |
| H | -3.4855202 | -0.6961625 | -1.8976481 |
| H | -3.4462559 | 2.1228081  | -2.4871024 |
| H | -4.0556896 | 0.7873835  | -3.5156344 |
| H | -0.6665468 | 1.6941016  | -2.0851981 |
| H | -1.3061406 | -1.1517411 | -2.2998667 |
| H | 2.4860790  | 0.7619611  | 5.3946299  |
| H | 3.7168728  | -0.5480603 | 5.2426811  |
| H | 2.0038884  | -0.9560485 | 5.6327499  |

\$vibrational spectrum

| #  | mode | symmetry | wave number | IR intensity | selection rules |       |
|----|------|----------|-------------|--------------|-----------------|-------|
| #  |      |          | cm**(-1)    | km/mol       | IR              | RAMAN |
| 1  |      |          | 0.00        | 0.00000      | -               | -     |
| 2  |      |          | 0.00        | 0.00000      | -               | -     |
| 3  |      |          | 0.00        | 0.00000      | -               | -     |
| 4  |      |          | 0.00        | 0.00000      | -               | -     |
| 5  |      |          | 0.00        | 0.00000      | -               | -     |
| 6  |      |          | 0.00        | 0.00000      | -               | -     |
| 7  |      | a        | 32.46       | 1.32549      | YES             | YES   |
| 8  |      | a        | 40.97       | 2.68258      | YES             | YES   |
| 9  |      | a        | 51.66       | 0.11918      | YES             | YES   |
| 10 |      | a        | 75.95       | 0.36585      | YES             | YES   |
| 11 |      | a        | 95.13       | 0.28409      | YES             | YES   |
| 12 |      | a        | 98.26       | 0.14764      | YES             | YES   |
| 13 |      | a        | 102.32      | 0.24753      | YES             | YES   |
| 14 |      | a        | 128.55      | 2.21866      | YES             | YES   |
| 15 |      | a        | 131.79      | 2.47801      | YES             | YES   |
| 16 |      | a        | 202.27      | 0.33551      | YES             | YES   |
| 17 |      | a        | 213.48      | 0.64153      | YES             | YES   |
| 18 |      | a        | 252.74      | 1.99361      | YES             | YES   |
| 19 |      | a        | 262.36      | 0.46050      | YES             | YES   |
| 20 |      | a        | 281.69      | 4.01542      | YES             | YES   |
| 21 |      | a        | 312.62      | 4.84903      | YES             | YES   |
| 22 |      | a        | 323.17      | 3.21589      | YES             | YES   |
| 23 |      | a        | 390.64      | 4.09645      | YES             | YES   |
| 24 |      | a        | 411.73      | 3.00280      | YES             | YES   |
| 25 |      | a        | 436.81      | 0.50164      | YES             | YES   |
| 26 |      | a        | 493.47      | 25.43168     | YES             | YES   |
| 27 |      | a        | 508.77      | 113.08135    | YES             | YES   |
| 28 |      | a        | 534.05      | 10.23991     | YES             | YES   |
| 29 |      | a        | 545.71      | 37.10191     | YES             | YES   |
| 30 |      | a        | 582.58      | 46.20626     | YES             | YES   |
| 31 |      | a        | 603.54      | 29.32661     | YES             | YES   |
| 32 |      | a        | 613.23      | 2.51359      | YES             | YES   |
| 33 |      | a        | 623.82      | 15.41473     | YES             | YES   |
| 34 |      | a        | 667.15      | 58.97105     | YES             | YES   |
| 35 |      | a        | 690.21      | 6.87422      | YES             | YES   |
| 36 |      | a        | 740.82      | 4.20967      | YES             | YES   |
| 37 |      | a        | 788.89      | 12.36679     | YES             | YES   |
| 38 |      | a        | 806.29      | 36.88200     | YES             | YES   |
| 39 |      | a        | 815.21      | 3.71629      | YES             | YES   |
| 40 |      | a        | 841.54      | 12.53565     | YES             | YES   |
| 41 |      | a        | 854.07      | 33.43152     | YES             | YES   |
| 42 |      | a        | 859.27      | 10.26141     | YES             | YES   |
| 43 |      | a        | 871.22      | 11.46102     | YES             | YES   |
| 44 |      | a        | 892.07      | 37.04017     | YES             | YES   |
| 45 |      | a        | 905.67      | 8.55998      | YES             | YES   |
| 46 |      | a        | 937.16      | 21.95969     | YES             | YES   |
| 47 |      | a        | 945.86      | 36.11721     | YES             | YES   |
| 48 |      | a        | 971.76      | 11.93884     | YES             | YES   |
| 49 |      | a        | 972.52      | 78.17454     | YES             | YES   |
| 50 |      | a        | 984.94      | 6.11996      | YES             | YES   |

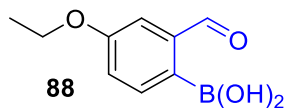

SCF Energy (au)BP86/SV(P)

-674.9406753105

SCF Energy (au)PBE0/def2-TZVPP -674.9275964242  
 SCF Energy (au)PBE0/def2-TZVPP -674.9498077236 (H<sub>2</sub>O Correction)  
 Zero Point Energy (au) 0.1887753  
 Chemical Potential (kJ mol<sup>-1</sup>) 385.49  
 Dispersion Correction (au) PBE0/def2-TZVPP -0.02309721

xyz coordinates  
 25

|   |            |            |            |
|---|------------|------------|------------|
| C | 0.8692490  | -0.2257113 | 0.7959236  |
| C | -0.4933351 | 0.1470849  | 0.7817398  |
| O | -1.2467293 | 0.3952855  | 1.8872224  |
| C | -1.1462022 | 0.2753851  | -0.4623468 |
| H | -2.2125705 | 0.5562666  | -0.4742417 |
| C | -0.4484443 | 0.0409857  | -1.6599565 |
| C | -1.1696590 | 0.1687176  | -2.9471273 |
| C | 0.9268066  | -0.3308772 | -1.6705095 |
| C | 1.5508787  | -0.4593147 | -0.4161465 |
| H | 2.6117724  | -0.7592731 | -0.3633153 |
| B | 1.7364544  | -0.6019414 | -3.0137117 |
| O | 2.3881120  | 0.3873014  | -3.7246896 |
| O | 1.9662966  | -1.9047792 | -3.3751826 |
| H | 2.4899450  | -1.9267254 | -4.2065726 |
| H | 2.1209506  | 1.2835536  | -3.4374479 |
| H | -2.2637207 | 0.4468256  | -2.8688666 |
| O | -0.6509369 | -0.0052088 | -4.0423814 |
| H | 1.4116867  | -0.3426130 | 1.7458226  |
| C | -0.6582688 | 0.2460222  | 3.1812092  |
| H | -0.2756138 | -0.7962551 | 3.3033303  |
| C | -1.7256349 | 0.5569297  | 4.2200851  |
| H | 0.2109718  | 0.9401257  | 3.2840675  |
| H | -2.1002831 | 1.5962815  | 4.1009766  |
| H | -1.3046897 | 0.4495908  | 5.2429648  |
| H | -2.5870355 | -0.1376568 | 4.1191539  |

\$vibrational spectrum

| #  | mode | symmetry | wave number<br>cm**(-1) | IR intensity<br>km/mol | selection rules<br>IR | RAMAN |
|----|------|----------|-------------------------|------------------------|-----------------------|-------|
| 1  |      |          | 0.00                    | 0.00000                | -                     | -     |
| 2  |      |          | 0.00                    | 0.00000                | -                     | -     |
| 3  |      |          | 0.00                    | 0.00000                | -                     | -     |
| 4  |      |          | 0.00                    | 0.00000                | -                     | -     |
| 5  |      |          | 0.00                    | 0.00000                | -                     | -     |
| 6  |      |          | 0.00                    | 0.00000                | -                     | -     |
| 7  |      | a        | 31.64                   | 0.24155                | YES                   | YES   |
| 8  |      | a        | 43.04                   | 0.40078                | YES                   | YES   |
| 9  |      | a        | 82.54                   | 0.56006                | YES                   | YES   |
| 10 |      | a        | 106.67                  | 0.52903                | YES                   | YES   |
| 11 |      | a        | 112.90                  | 1.19890                | YES                   | YES   |
| 12 |      | a        | 126.18                  | 4.91741                | YES                   | YES   |
| 13 |      | a        | 141.32                  | 8.38718                | YES                   | YES   |
| 14 |      | a        | 205.15                  | 3.52309                | YES                   | YES   |
| 15 |      | a        | 226.48                  | 4.78505                | YES                   | YES   |
| 16 |      | a        | 257.07                  | 3.30743                | YES                   | YES   |
| 17 |      | a        | 258.98                  | 3.85558                | YES                   | YES   |
| 18 |      | a        | 279.68                  | 2.29754                | YES                   | YES   |
| 19 |      | a        | 339.90                  | 5.23091                | YES                   | YES   |
| 20 |      | a        | 379.61                  | 0.90233                | YES                   | YES   |
| 21 |      | a        | 402.91                  | 2.40395                | YES                   | YES   |

|    |   |         |           |     |     |
|----|---|---------|-----------|-----|-----|
| 22 | a | 449.69  | 11.90479  | YES | YES |
| 23 | a | 467.58  | 50.36263  | YES | YES |
| 24 | a | 471.87  | 80.36941  | YES | YES |
| 25 | a | 555.14  | 28.28682  | YES | YES |
| 26 | a | 561.10  | 15.75117  | YES | YES |
| 27 | a | 589.64  | 3.77702   | YES | YES |
| 28 | a | 632.43  | 33.65381  | YES | YES |
| 29 | a | 669.46  | 24.59020  | YES | YES |
| 30 | a | 697.17  | 27.98071  | YES | YES |
| 31 | a | 734.85  | 1.72734   | YES | YES |
| 32 | a | 772.46  | 34.88571  | YES | YES |
| 33 | a | 806.35  | 15.56160  | YES | YES |
| 34 | a | 827.09  | 5.52891   | YES | YES |
| 35 | a | 874.01  | 13.17085  | YES | YES |
| 36 | a | 881.59  | 26.93655  | YES | YES |
| 37 | a | 942.82  | 1.69313   | YES | YES |
| 38 | a | 962.79  | 20.66050  | YES | YES |
| 39 | a | 964.17  | 112.17912 | YES | YES |
| 40 | a | 990.31  | 0.11234   | YES | YES |
| 41 | a | 1005.40 | 161.89850 | YES | YES |
| 42 | a | 1045.66 | 75.63712  | YES | YES |
| 43 | a | 1077.47 | 29.76333  | YES | YES |
| 44 | a | 1109.99 | 26.70062  | YES | YES |
| 45 | a | 1129.81 | 33.18926  | YES | YES |
| 46 | a | 1144.78 | 4.42337   | YES | YES |
| 47 | a | 1155.94 | 25.49348  | YES | YES |
| 48 | a | 1240.86 | 34.94524  | YES | YES |
| 49 | a | 1261.88 | 0.47023   | YES | YES |
| 50 | a | 1284.18 | 494.84043 | YES | YES |

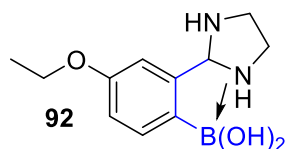

SCF Energy (au)BP86/SV(P) -788.9425095482  
 SCF Energy (au)PBE0/def2-TZVPP -788.9272939722  
 SCF Energy (au)PBE0/def2-TZVPP -788.9492048317 (H<sub>2</sub>O Correction)  
 Zero Point Energy (au) 0.2759082  
 Chemical Potential (kJ mol<sup>-1</sup>) 604.22  
 Dispersion Correction (au) PBE0/def2-TZVPP -0.03346174

xyz coordinates  
 34

|   |            |            |            |
|---|------------|------------|------------|
| C | 1.6317658  | -0.3479865 | 2.2473479  |
| C | 0.2665208  | -0.0278803 | 2.0810459  |
| O | -0.4062145 | 0.3462255  | 3.2065425  |
| C | -0.3122739 | -0.1072353 | 0.7965076  |
| H | -1.3660726 | 0.1413393  | 0.5999420  |
| C | 0.4587230  | -0.5164703 | -0.3050478 |
| C | -0.1706303 | -0.5285419 | -1.6957723 |
| C | 1.8297725  | -0.8568570 | -0.1601645 |
| C | 2.3873852  | -0.7453958 | 1.1388462  |
| H | 3.4505926  | -1.0037102 | 1.2967715  |
| N | -1.6314178 | -0.2156127 | -1.7264191 |
| N | 0.4908565  | 0.4719760  | -2.5510039 |
| C | -0.5133563 | 0.8045091  | -3.5692147 |

|   |            |            |            |
|---|------------|------------|------------|
| H | -0.5042715 | 0.0154072  | -4.3567411 |
| H | -0.2806843 | 1.7766286  | -4.0538044 |
| B | 2.7425595  | -1.3411831 | -1.3517439 |
| O | 4.0306815  | -0.8647663 | -1.5279718 |
| O | 2.3240682  | -2.3397690 | -2.2000745 |
| H | 3.0147252  | -2.5039665 | -2.8792582 |
| H | 4.2162361  | -0.1236691 | -0.9151972 |
| C | -1.8531340 | 0.7815326  | -2.7927318 |
| H | -2.1704221 | -1.0710785 | -1.9058403 |
| H | -2.0624831 | 1.7884914  | -2.3565248 |
| H | -2.7279886 | 0.5111897  | -3.4248166 |
| H | 0.6855723  | 1.3077032  | -1.9766280 |
| H | 0.0083855  | -1.5313798 | -2.1510942 |
| H | 2.0721549  | -0.2848673 | 3.2552423  |
| C | -1.7910747 | 0.6792012  | 3.1077210  |
| H | -2.3614873 | -0.1871967 | 2.6942842  |
| H | -1.9265405 | 1.5345195  | 2.4025335  |
| C | -2.2865812 | 1.0401763  | 4.5010088  |
| H | -3.3643880 | 1.3095001  | 4.4657631  |
| H | -1.7208149 | 1.9054300  | 4.9087122  |
| H | -2.1601641 | 0.1837363  | 5.1977803  |

# vibrational spectrum

| #  | mode | symmetry | wave number<br>cm**(-1) | IR intensity<br>km/mol | selection rules |       |
|----|------|----------|-------------------------|------------------------|-----------------|-------|
| #  |      |          |                         |                        | IR              | RAMAN |
| 1  |      |          | 0.00                    | 0.00000                | -               | -     |
| 2  |      |          | 0.00                    | 0.00000                | -               | -     |
| 3  |      |          | 0.00                    | 0.00000                | -               | -     |
| 4  |      |          | 0.00                    | 0.00000                | -               | -     |
| 5  |      |          | 0.00                    | 0.00000                | -               | -     |
| 6  |      |          | 0.00                    | 0.00000                | -               | -     |
| 7  |      | a        | 37.95                   | 0.69293                | YES             | YES   |
| 8  |      | a        | 38.84                   | 0.46599                | YES             | YES   |
| 9  |      | a        | 48.39                   | 2.60176                | YES             | YES   |
| 10 |      | a        | 79.45                   | 0.58012                | YES             | YES   |
| 11 |      | a        | 93.99                   | 0.23451                | YES             | YES   |
| 12 |      | a        | 103.32                  | 0.63507                | YES             | YES   |
| 13 |      | a        | 105.62                  | 0.22877                | YES             | YES   |
| 14 |      | a        | 116.11                  | 1.73820                | YES             | YES   |
| 15 |      | a        | 147.07                  | 1.51618                | YES             | YES   |
| 16 |      | a        | 208.88                  | 0.51054                | YES             | YES   |
| 17 |      | a        | 236.65                  | 1.98296                | YES             | YES   |
| 18 |      | a        | 257.76                  | 1.30882                | YES             | YES   |
| 19 |      | a        | 260.10                  | 2.31876                | YES             | YES   |
| 20 |      | a        | 263.29                  | 0.51744                | YES             | YES   |
| 21 |      | a        | 293.91                  | 1.24063                | YES             | YES   |
| 22 |      | a        | 338.92                  | 6.93296                | YES             | YES   |
| 23 |      | a        | 381.96                  | 5.02205                | YES             | YES   |
| 24 |      | a        | 420.43                  | 6.02983                | YES             | YES   |
| 25 |      | a        | 439.96                  | 7.25825                | YES             | YES   |
| 26 |      | a        | 500.81                  | 8.47909                | YES             | YES   |
| 27 |      | a        | 507.87                  | 121.18499              | YES             | YES   |
| 28 |      | a        | 525.93                  | 36.83331               | YES             | YES   |
| 29 |      | a        | 553.06                  | 29.36751               | YES             | YES   |
| 30 |      | a        | 579.75                  | 14.87910               | YES             | YES   |
| 31 |      | a        | 608.79                  | 2.80337                | YES             | YES   |
| 32 |      | a        | 625.73                  | 14.53982               | YES             | YES   |
| 33 |      | a        | 643.18                  | 16.37811               | YES             | YES   |
| 34 |      | a        | 658.54                  | 61.05687               | YES             | YES   |

|    |   |        |           |     |     |
|----|---|--------|-----------|-----|-----|
| 35 | a | 681.57 | 17.97435  | YES | YES |
| 36 | a | 741.62 | 6.06715   | YES | YES |
| 37 | a | 771.86 | 16.26398  | YES | YES |
| 38 | a | 805.38 | 19.76878  | YES | YES |
| 39 | a | 814.11 | 3.29819   | YES | YES |
| 40 | a | 822.52 | 19.82781  | YES | YES |
| 41 | a | 829.72 | 65.21726  | YES | YES |
| 42 | a | 879.30 | 2.31600   | YES | YES |
| 43 | a | 895.71 | 24.60431  | YES | YES |
| 44 | a | 901.86 | 4.59493   | YES | YES |
| 45 | a | 907.46 | 27.34382  | YES | YES |
| 46 | a | 929.34 | 11.72127  | YES | YES |
| 47 | a | 944.29 | 2.70749   | YES | YES |
| 48 | a | 964.76 | 105.19476 | YES | YES |
| 49 | a | 980.14 | 10.17753  | YES | YES |
| 50 | a | 984.42 | 18.46665  | YES | YES |

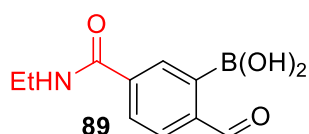

SCF Energy (au)BP86/SV(P) -768.3662804744  
 SCF Energy (au)PBE0/def2-TZVPP -768.3458665976  
 SCF Energy (au)PBE0/def2-TZVPP -768.3756837592 (H<sub>2</sub>O Correction)  
 Zero Point Energy (au) 0.2106700  
 Chemical Potential (kJ mol<sup>-1</sup>) 433.00  
 Dispersion Correction (au) PBE0/def2-TZVPP -0.02729908

xyz coordinates  
28

|   |            |            |            |
|---|------------|------------|------------|
| C | 0.0815768  | 0.0436788  | 0.1620131  |
| C | -1.2543376 | 0.4694664  | -0.0023776 |
| C | -1.8297388 | 0.4787211  | -1.2795124 |
| H | -2.8712530 | 0.8192015  | -1.4165020 |
| C | -1.0790225 | 0.0648810  | -2.3992879 |
| C | -1.6915726 | 0.0838783  | -3.7472164 |
| C | 0.2720443  | -0.3604746 | -2.2631661 |
| C | 0.8292976  | -0.3476902 | -0.9722863 |
| H | 1.8760597  | -0.6505322 | -0.8046681 |
| B | 1.1343219  | -0.8500432 | -3.5134552 |
| O | 1.9893301  | -0.0232462 | -4.2127994 |
| O | 1.1755455  | -2.1944022 | -3.7709400 |
| H | 1.7584923  | -2.3662090 | -4.5430413 |
| H | 1.8803724  | 0.9198741  | -3.9763774 |
| H | -2.7778383 | 0.3976095  | -3.7896502 |
| O | -1.0891597 | -0.2076672 | -4.7721562 |
| C | 0.7912857  | 0.0306121  | 1.4995650  |
| N | -0.0181142 | -0.1486585 | 2.5991530  |
| O | 2.0140463  | 0.1634793  | 1.5761011  |
| C | 0.4980592  | -0.1741438 | 3.9621896  |
| H | -1.0054440 | -0.3691893 | 2.4505331  |
| C | -0.0734348 | 0.9441371  | 4.8426513  |
| H | 1.5995304  | -0.0800184 | 3.8651824  |
| H | 0.2876611  | -1.1697421 | 4.4188334  |
| H | 0.1796869  | 1.9445177  | 4.4294523  |
| H | 0.3446522  | 0.8777397  | 5.8713307  |

H -1.1817634 0.8752183 4.9263331  
H -1.8402839 0.8290020 0.8600983

\$vibrational spectrum

| #  | mode | symmetry | wave number<br>cm**(-1) | IR intensity<br>km/mol | selection rules |       |
|----|------|----------|-------------------------|------------------------|-----------------|-------|
| #  |      |          |                         |                        | IR              | RAMAN |
| 1  |      |          | 0.00                    | 0.00000                | -               | -     |
| 2  |      |          | 0.00                    | 0.00000                | -               | -     |
| 3  |      |          | 0.00                    | 0.00000                | -               | -     |
| 4  |      |          | 0.00                    | 0.00000                | -               | -     |
| 5  |      |          | 0.00                    | 0.00000                | -               | -     |
| 6  |      |          | 0.00                    | 0.00000                | -               | -     |
| 7  |      | a        | 24.87                   | 0.73453                | YES             | YES   |
| 8  |      | a        | 36.10                   | 2.24005                | YES             | YES   |
| 9  |      | a        | 47.86                   | 3.70088                | YES             | YES   |
| 10 |      | a        | 67.34                   | 1.22314                | YES             | YES   |
| 11 |      | a        | 82.65                   | 0.89780                | YES             | YES   |
| 12 |      | a        | 101.28                  | 2.24117                | YES             | YES   |
| 13 |      | a        | 113.66                  | 3.75005                | YES             | YES   |
| 14 |      | a        | 130.81                  | 4.40072                | YES             | YES   |
| 15 |      | a        | 163.93                  | 8.95849                | YES             | YES   |
| 16 |      | a        | 201.74                  | 0.66020                | YES             | YES   |
| 17 |      | a        | 240.55                  | 4.70702                | YES             | YES   |
| 18 |      | a        | 258.98                  | 7.88328                | YES             | YES   |
| 19 |      | a        | 282.03                  | 5.04865                | YES             | YES   |
| 20 |      | a        | 299.91                  | 5.90835                | YES             | YES   |
| 21 |      | a        | 313.93                  | 11.23654               | YES             | YES   |
| 22 |      | a        | 339.20                  | 9.53129                | YES             | YES   |
| 23 |      | a        | 384.21                  | 3.56646                | YES             | YES   |
| 24 |      | a        | 446.48                  | 1.20622                | YES             | YES   |
| 25 |      | a        | 459.07                  | 83.62511               | YES             | YES   |
| 26 |      | a        | 471.70                  | 45.41283               | YES             | YES   |
| 27 |      | a        | 496.92                  | 49.46255               | YES             | YES   |
| 28 |      | a        | 511.15                  | 62.50418               | YES             | YES   |
| 29 |      | a        | 548.62                  | 15.98943               | YES             | YES   |
| 30 |      | a        | 560.11                  | 9.20575                | YES             | YES   |
| 31 |      | a        | 587.34                  | 6.07136                | YES             | YES   |
| 32 |      | a        | 631.28                  | 37.54256               | YES             | YES   |
| 33 |      | a        | 673.14                  | 17.65288               | YES             | YES   |
| 34 |      | a        | 712.23                  | 8.34670                | YES             | YES   |
| 35 |      | a        | 727.61                  | 5.37663                | YES             | YES   |
| 36 |      | a        | 757.91                  | 9.14752                | YES             | YES   |
| 37 |      | a        | 766.19                  | 26.77140               | YES             | YES   |
| 38 |      | a        | 826.67                  | 9.04013                | YES             | YES   |
| 39 |      | a        | 831.07                  | 56.65390               | YES             | YES   |
| 40 |      | a        | 885.58                  | 9.11821                | YES             | YES   |
| 41 |      | a        | 903.16                  | 1.39390                | YES             | YES   |
| 42 |      | a        | 936.17                  | 8.12480                | YES             | YES   |
| 43 |      | a        | 946.62                  | 0.72619                | YES             | YES   |
| 44 |      | a        | 963.95                  | 140.66609              | YES             | YES   |
| 45 |      | a        | 990.29                  | 0.08891                | YES             | YES   |
| 46 |      | a        | 1002.37                 | 135.59014              | YES             | YES   |
| 47 |      | a        | 1044.67                 | 2.05876                | YES             | YES   |
| 48 |      | a        | 1062.00                 | 20.47711               | YES             | YES   |
| 49 |      | a        | 1082.01                 | 9.56451                | YES             | YES   |
| 50 |      | a        | 1123.54                 | 4.40527                | YES             | YES   |

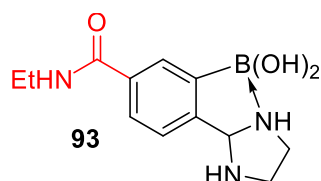

SCF Energy (au)BP86/SV(P) -882.3692975849  
 SCF Energy (au)PBE0/def2-TZVPP -882.3468880601  
 SCF Energy (au)PBE0/def2-TZVPP -882.3757328395 (H<sub>2</sub>O Correction)  
 Zero Point Energy (au) 0.2981772  
 Chemical Potential (kJ mol<sup>-1</sup>) 653.54  
 Dispersion Correction (au) PBE0/def2-TZVPP -0.03751637

xyz coordinates

37

|   |            |            |            |
|---|------------|------------|------------|
| C | 0.1198952  | 0.8785706  | 1.2542675  |
| C | -1.0885955 | 0.2080747  | 0.9759599  |
| H | -1.9750041 | 0.3558618  | 1.6171557  |
| C | -1.1980916 | -0.6178452 | -0.1544076 |
| H | -2.1397636 | -1.1343117 | -0.4013854 |
| C | -0.1059423 | -0.7994209 | -1.0192777 |
| C | -0.2521202 | -1.6390043 | -2.2828730 |
| C | 1.1277891  | -0.1379215 | -0.7604647 |
| C | 1.2021339  | 0.7077888  | 0.3652670  |
| H | 2.1291059  | 1.2597408  | 0.5984070  |
| N | -1.5701461 | -2.3215501 | -2.4341617 |
| N | -0.0826139 | -0.7797205 | -3.4684177 |
| C | -0.8108216 | -1.4823147 | -4.5336593 |
| H | -0.1647862 | -2.2964048 | -4.9359968 |
| H | -1.0550161 | -0.7909063 | -5.3676636 |
| B | 2.4113694  | -0.2958537 | -1.6747118 |
| O | 3.1737027  | 0.7901072  | -2.0561657 |
| O | 2.8670510  | -1.5444099 | -2.0222533 |
| H | 3.6749555  | -1.4581833 | -2.5751683 |
| H | 2.7619573  | 1.6360566  | -1.7825120 |
| C | -2.0457096 | -2.0747283 | -3.8104243 |
| H | -1.4695759 | -3.3276750 | -2.2552984 |
| H | -2.8847130 | -1.3370189 | -3.8138548 |
| H | -2.4298981 | -3.0076395 | -4.2789514 |
| H | -0.5454925 | 0.1241911  | -3.2800709 |
| H | 0.5693856  | -2.3949179 | -2.2951885 |
| C | 0.3235276  | 1.8122350  | 2.4232215  |
| N | -0.5257680 | 1.6256879  | 3.4937738  |
| O | 1.1950966  | 2.6859690  | 2.4105236  |
| C | -0.4218421 | 2.4128428  | 4.7149741  |
| H | -1.1024710 | 0.7814055  | 3.5133983  |
| H | -1.4417422 | 2.7421954  | 5.0207096  |
| H | 0.1594940  | 3.3175387  | 4.4414215  |
| C | 0.2651732  | 1.6673816  | 5.8676258  |
| H | 0.3068949  | 2.3090475  | 6.7756886  |
| H | 1.3052133  | 1.3889726  | 5.5919263  |
| H | -0.2826317 | 0.7361590  | 6.1385868  |

\$vibrational spectrum

| # | mode | symmetry | wave number<br>cm**(-1) | IR intensity<br>km/mol | selection rules<br>IR RAMAN |
|---|------|----------|-------------------------|------------------------|-----------------------------|
| # |      |          |                         |                        |                             |
| 1 |      |          | 0.00                    | 0.00000                | - -                         |

|    |   |        |           |     |     |
|----|---|--------|-----------|-----|-----|
| 2  |   | 0.00   | 0.00000   | -   | -   |
| 3  |   | 0.00   | 0.00000   | -   | -   |
| 4  |   | 0.00   | 0.00000   | -   | -   |
| 5  |   | 0.00   | 0.00000   | -   | -   |
| 6  |   | 0.00   | 0.00000   | -   | -   |
| 7  | a | 33.23  | 1.92012   | YES | YES |
| 8  | a | 39.26  | 0.21237   | YES | YES |
| 9  | a | 44.62  | 1.48425   | YES | YES |
| 10 | a | 47.53  | 1.03714   | YES | YES |
| 11 | a | 62.55  | 5.34562   | YES | YES |
| 12 | a | 79.56  | 0.96542   | YES | YES |
| 13 | a | 86.40  | 0.16151   | YES | YES |
| 14 | a | 100.11 | 1.23173   | YES | YES |
| 15 | a | 118.25 | 0.79332   | YES | YES |
| 16 | a | 127.65 | 1.60168   | YES | YES |
| 17 | a | 167.56 | 2.21721   | YES | YES |
| 18 | a | 210.76 | 1.05532   | YES | YES |
| 19 | a | 240.80 | 3.10806   | YES | YES |
| 20 | a | 243.91 | 2.67756   | YES | YES |
| 21 | a | 272.02 | 2.30307   | YES | YES |
| 22 | a | 290.54 | 7.23765   | YES | YES |
| 23 | a | 315.85 | 0.90137   | YES | YES |
| 24 | a | 325.10 | 17.16460  | YES | YES |
| 25 | a | 377.42 | 5.93944   | YES | YES |
| 26 | a | 404.47 | 2.20545   | YES | YES |
| 27 | a | 432.62 | 3.28190   | YES | YES |
| 28 | a | 472.68 | 19.64407  | YES | YES |
| 29 | a | 484.85 | 4.97184   | YES | YES |
| 30 | a | 512.19 | 49.18796  | YES | YES |
| 31 | a | 515.62 | 183.46617 | YES | YES |
| 32 | a | 534.83 | 13.62593  | YES | YES |
| 33 | a | 563.17 | 13.53597  | YES | YES |
| 34 | a | 586.91 | 17.31830  | YES | YES |
| 35 | a | 600.59 | 34.08771  | YES | YES |
| 36 | a | 609.84 | 1.53027   | YES | YES |
| 37 | a | 656.05 | 56.84228  | YES | YES |
| 38 | a | 657.05 | 19.13621  | YES | YES |
| 39 | a | 717.18 | 1.23204   | YES | YES |
| 40 | a | 739.49 | 0.90394   | YES | YES |
| 41 | a | 749.62 | 17.34563  | YES | YES |
| 42 | a | 778.78 | 12.71984  | YES | YES |
| 43 | a | 802.54 | 21.86722  | YES | YES |
| 44 | a | 810.80 | 25.39209  | YES | YES |
| 45 | a | 848.15 | 10.94579  | YES | YES |
| 46 | a | 855.33 | 56.44561  | YES | YES |
| 47 | a | 882.84 | 0.49062   | YES | YES |
| 48 | a | 891.59 | 19.53127  | YES | YES |
| 49 | a | 898.51 | 6.57716   | YES | YES |
| 50 | a | 905.10 | 10.25409  | YES | YES |

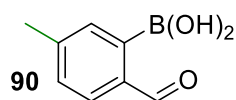

SCF Energy (au)BP86/SV(P) -560.4967517160  
 SCF Energy (au)PBE0/def2-TZVPP -560.4829583873  
 SCF Energy (au)PBE0/def2-TZVPP -560.5031469908 (H<sub>2</sub>O Correction)

Zero Point Energy (au) 0.1562139  
 Chemical Potential (kJ mol<sup>-1</sup>) 307.75  
 Dispersion Correction (au) PBE0/def2-TZVPP -0.02008636

xyz coordinates  
 21

|   |            |            |            |
|---|------------|------------|------------|
| C | 0.7124482  | 0.1671435  | 3.1277351  |
| C | 0.0769321  | 0.1724504  | 1.7565363  |
| C | -1.2561549 | 0.6003831  | 1.5729546  |
| H | -1.8525741 | 0.9166407  | 2.4456734  |
| C | -1.8248592 | 0.6174581  | 0.2933383  |
| H | -2.8708807 | 0.9439486  | 0.1552711  |
| C | -1.0701973 | 0.2108811  | -0.8266783 |
| C | -1.6747167 | 0.2225142  | -2.1737977 |
| C | 0.2753983  | -0.2272526 | -0.6784133 |
| C | 0.8156764  | -0.2383285 | 0.6198758  |
| H | 1.8525537  | -0.5891937 | 0.7694565  |
| B | 1.1527588  | -0.7100252 | -1.9190795 |
| O | 1.9354869  | 0.1371922  | -2.6781784 |
| O | 1.2998109  | -2.0599849 | -2.1060684 |
| H | 1.8737796  | -2.2220887 | -2.8871601 |
| H | 1.7164661  | 1.0792363  | -2.5304242 |
| H | -2.7546499 | 0.5570557  | -2.2246473 |
| O | -1.0767488 | -0.0967469 | -3.1951920 |
| H | 1.3435907  | 1.0741882  | 3.2773115  |
| H | 1.3761470  | -0.7140295 | 3.2658553  |
| H | -0.0502671 | 0.1585581  | 3.9356313  |

\$vibrational spectrum

| #  | mode | symmetry | wave number<br>cm**(-1) | IR intensity<br>km/mol | selection rules<br>IR | RAMAN |
|----|------|----------|-------------------------|------------------------|-----------------------|-------|
| #  |      |          |                         |                        |                       |       |
| 1  |      |          | 0.00                    | 0.00000                | -                     | -     |
| 2  |      |          | 0.00                    | 0.00000                | -                     | -     |
| 3  |      |          | 0.00                    | 0.00000                | -                     | -     |
| 4  |      |          | 0.00                    | 0.00000                | -                     | -     |
| 5  |      |          | 0.00                    | 0.00000                | -                     | -     |
| 6  |      |          | 0.00                    | 0.00000                | -                     | -     |
| 7  |      | a        | 33.78                   | 0.26919                | YES                   | YES   |
| 8  |      | a        | 55.15                   | 0.38611                | YES                   | YES   |
| 9  |      | a        | 86.50                   | 2.44503                | YES                   | YES   |
| 10 |      | a        | 108.26                  | 1.38162                | YES                   | YES   |
| 11 |      | a        | 127.47                  | 8.19956                | YES                   | YES   |
| 12 |      | a        | 182.64                  | 5.40546                | YES                   | YES   |
| 13 |      | a        | 197.50                  | 8.01195                | YES                   | YES   |
| 14 |      | a        | 271.87                  | 0.90310                | YES                   | YES   |
| 15 |      | a        | 288.02                  | 7.23366                | YES                   | YES   |
| 16 |      | a        | 346.83                  | 0.50713                | YES                   | YES   |
| 17 |      | a        | 353.06                  | 4.14536                | YES                   | YES   |
| 18 |      | a        | 412.58                  | 4.98028                | YES                   | YES   |
| 19 |      | a        | 449.17                  | 16.06998               | YES                   | YES   |
| 20 |      | a        | 463.19                  | 104.39600              | YES                   | YES   |
| 21 |      | a        | 534.46                  | 32.98871               | YES                   | YES   |
| 22 |      | a        | 552.02                  | 15.21097               | YES                   | YES   |
| 23 |      | a        | 581.27                  | 6.67493                | YES                   | YES   |
| 24 |      | a        | 612.42                  | 8.25378                | YES                   | YES   |
| 25 |      | a        | 634.42                  | 59.27584               | YES                   | YES   |
| 26 |      | a        | 689.77                  | 5.43340                | YES                   | YES   |
| 27 |      | a        | 743.64                  | 1.12778                | YES                   | YES   |

|    |   |         |           |     |     |
|----|---|---------|-----------|-----|-----|
| 28 | a | 790.94  | 45.77967  | YES | YES |
| 29 | a | 807.00  | 19.23278  | YES | YES |
| 30 | a | 891.04  | 11.51409  | YES | YES |
| 31 | a | 901.19  | 1.97278   | YES | YES |
| 32 | a | 946.60  | 0.77056   | YES | YES |
| 33 | a | 964.52  | 129.20301 | YES | YES |
| 34 | a | 986.18  | 13.29851  | YES | YES |
| 35 | a | 990.04  | 0.40928   | YES | YES |
| 36 | a | 1004.46 | 130.90090 | YES | YES |
| 37 | a | 1025.59 | 12.33435  | YES | YES |
| 38 | a | 1065.49 | 35.77171  | YES | YES |
| 39 | a | 1126.65 | 8.08611   | YES | YES |
| 40 | a | 1207.27 | 44.74838  | YES | YES |
| 41 | a | 1210.43 | 34.83124  | YES | YES |
| 42 | a | 1254.05 | 27.96557  | YES | YES |
| 43 | a | 1330.27 | 171.49387 | YES | YES |
| 44 | a | 1351.68 | 88.75970  | YES | YES |
| 45 | a | 1362.08 | 15.12464  | YES | YES |
| 46 | a | 1375.55 | 2.46360   | YES | YES |
| 47 | a | 1394.99 | 30.06201  | YES | YES |
| 48 | a | 1401.08 | 285.33565 | YES | YES |
| 49 | a | 1426.04 | 7.40076   | YES | YES |
| 50 | a | 1435.19 | 4.52209   | YES | YES |

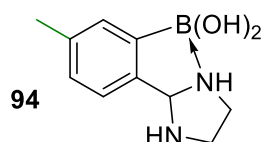

SCF Energy (au)BP86/SV(P) -674.4962885969  
 SCF Energy (au)PBE0/def2-TZVPP -674.4801110801  
 SCF Energy (au)PBE0/def2-TZVPP -674.4998723066 (H<sub>2</sub>O Correction)  
 Zero Point Energy (au) 0.2433506  
 Chemical Potential (kJ mol<sup>-1</sup>) 525.27  
 Dispersion Correction (au) PBE0/def2-TZVPP -0.03018458

xyz coordinates  
 30

|   |            |            |            |
|---|------------|------------|------------|
| C | 0.9615971  | -0.1561163 | 2.7473288  |
| C | -0.4085181 | 0.1444622  | 2.6102510  |
| H | -0.9937709 | 0.4318756  | 3.5015820  |
| C | -1.0390199 | 0.0894534  | 1.3564603  |
| H | -2.1070343 | 0.3353991  | 1.2390795  |
| C | -0.3207677 | -0.2774020 | 0.2062477  |
| C | -0.9878706 | -0.2716974 | -1.1645320 |
| C | 1.0613721  | -0.5931271 | 0.3076675  |
| C | 1.6721986  | -0.5090029 | 1.5797057  |
| H | 2.7482331  | -0.7482663 | 1.6753500  |
| N | -2.4488151 | 0.0332180  | -1.1507084 |
| N | -0.3557693 | 0.7462093  | -2.0223312 |
| C | -1.3872611 | 1.0751530  | -3.0153648 |
| H | -1.3856417 | 0.2926450  | -3.8092351 |
| H | -1.1770939 | 2.0539622  | -3.4967019 |
| B | 1.9467905  | -1.0179769 | -0.9322428 |
| O | 3.1889318  | -0.4565013 | -1.1674352 |
| O | 1.5542112  | -2.0482050 | -1.7520142 |

|   |            |            |            |
|---|------------|------------|------------|
| H | 2.2204495  | -2.1754228 | -2.4629407 |
| H | 3.3558295  | 0.2930965  | -0.5596097 |
| C | -2.7086486 | 1.0299855  | -2.2084708 |
| H | -2.9910716 | -0.8239167 | -1.3102878 |
| H | -2.9236182 | 2.0327217  | -1.7649889 |
| H | -3.5928104 | 0.7497969  | -2.8233841 |
| H | -0.1660244 | 1.5790662  | -1.4417190 |
| H | -0.8138082 | -1.2653397 | -1.6433218 |
| C | 1.6391251  | -0.1348581 | 4.1005527  |
| H | 1.1996457  | 0.6386337  | 4.7677941  |
| H | 2.7287778  | 0.0666656  | 4.0110273  |
| H | 1.5303821  | -1.1145110 | 4.6222420  |

# \$vibrational spectrum

| #  | mode | symmetry | wave number<br>cm**(-1) | IR intensity<br>km/mol | selection rules |       |
|----|------|----------|-------------------------|------------------------|-----------------|-------|
| #  |      |          |                         |                        | IR              | RAMAN |
| 1  |      |          | 0.00                    | 0.00000                | -               | -     |
| 2  |      |          | 0.00                    | 0.00000                | -               | -     |
| 3  |      |          | 0.00                    | 0.00000                | -               | -     |
| 4  |      |          | 0.00                    | 0.00000                | -               | -     |
| 5  |      |          | 0.00                    | 0.00000                | -               | -     |
| 6  |      |          | 0.00                    | 0.00000                | -               | -     |
| 7  |      | a        | 37.19                   | 1.07755                | YES             | YES   |
| 8  |      | a        | 42.72                   | 1.92848                | YES             | YES   |
| 9  |      | a        | 45.10                   | 1.04826                | YES             | YES   |
| 10 |      | a        | 78.11                   | 0.37988                | YES             | YES   |
| 11 |      | a        | 85.88                   | 0.18659                | YES             | YES   |
| 12 |      | a        | 114.96                  | 0.90027                | YES             | YES   |
| 13 |      | a        | 118.33                  | 1.35459                | YES             | YES   |
| 14 |      | a        | 165.56                  | 0.49163                | YES             | YES   |
| 15 |      | a        | 210.24                  | 1.45287                | YES             | YES   |
| 16 |      | a        | 264.41                  | 1.63196                | YES             | YES   |
| 17 |      | a        | 298.33                  | 9.64356                | YES             | YES   |
| 18 |      | a        | 312.15                  | 2.07755                | YES             | YES   |
| 19 |      | a        | 321.25                  | 3.53982                | YES             | YES   |
| 20 |      | a        | 349.83                  | 1.60179                | YES             | YES   |
| 21 |      | a        | 410.33                  | 2.89567                | YES             | YES   |
| 22 |      | a        | 481.43                  | 12.55252               | YES             | YES   |
| 23 |      | a        | 499.07                  | 83.02366               | YES             | YES   |
| 24 |      | a        | 520.16                  | 67.73934               | YES             | YES   |
| 25 |      | a        | 539.77                  | 21.57590               | YES             | YES   |
| 26 |      | a        | 581.96                  | 21.28512               | YES             | YES   |
| 27 |      | a        | 588.36                  | 20.64614               | YES             | YES   |
| 28 |      | a        | 592.14                  | 25.51628               | YES             | YES   |
| 29 |      | a        | 609.98                  | 1.93984                | YES             | YES   |
| 30 |      | a        | 659.85                  | 72.13826               | YES             | YES   |
| 31 |      | a        | 690.41                  | 2.07992                | YES             | YES   |
| 32 |      | a        | 744.81                  | 5.57087                | YES             | YES   |
| 33 |      | a        | 788.48                  | 20.19874               | YES             | YES   |
| 34 |      | a        | 800.94                  | 29.39020               | YES             | YES   |
| 35 |      | a        | 837.46                  | 9.88888                | YES             | YES   |
| 36 |      | a        | 852.03                  | 45.88054               | YES             | YES   |
| 37 |      | a        | 875.17                  | 8.16490                | YES             | YES   |
| 38 |      | a        | 891.16                  | 25.43808               | YES             | YES   |
| 39 |      | a        | 897.36                  | 3.00083                | YES             | YES   |
| 40 |      | a        | 904.60                  | 7.74601                | YES             | YES   |
| 41 |      | a        | 944.41                  | 19.71977               | YES             | YES   |
| 42 |      | a        | 967.99                  | 86.85103               | YES             | YES   |
| 43 |      | a        | 972.36                  | 0.71430                | YES             | YES   |

|    |   |         |           |     |     |
|----|---|---------|-----------|-----|-----|
| 44 | a | 984.13  | 23.87868  | YES | YES |
| 45 | a | 985.59  | 9.21871   | YES | YES |
| 46 | a | 1010.34 | 119.89112 | YES | YES |
| 47 | a | 1028.34 | 10.58650  | YES | YES |
| 48 | a | 1042.10 | 64.72899  | YES | YES |
| 49 | a | 1071.27 | 19.34589  | YES | YES |
| 50 | a | 1083.57 | 11.05166  | YES | YES |

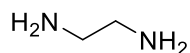

SCF Energy (au)BP86/SV(P) -190.3560477141  
 SCF Energy (au)PBE0/def2-TZVPP -190.3692189326  
 SCF Energy (au)PBE0/def2-TZVPP -190.3826064451 (H<sub>2</sub>O Correction)  
 Zero Point Energy (au) 0.1067987  
 Chemical Potential (kJ mol<sup>-1</sup>) 207.67  
 Dispersion Correction (au) PBE0/def2-TZVPP -0.00604782

xyz coordinates  
12

|   |            |            |            |
|---|------------|------------|------------|
| N | -1.1330603 | 1.2252625  | 0.8145257  |
| C | 0.1691229  | -0.8078177 | 0.2452857  |
| H | -0.7747596 | -1.3939372 | 0.1383079  |
| N | 1.1992336  | -1.4579361 | -0.5637413 |
| C | -0.1182786 | 0.6709942  | -0.0824277 |
| H | -2.0474290 | 0.7819880  | 0.6331013  |
| H | 0.8223445  | 1.2525489  | 0.0623127  |
| H | -0.3629794 | 0.7448803  | -1.1809071 |
| H | -1.2610430 | 2.2327847  | 0.6398534  |
| H | 0.4530204  | -0.8811665 | 1.3189967  |
| H | 2.0984138  | -0.9624036 | -0.4600138 |
| H | 0.9554147  | -1.4051973 | -1.5652936 |

\$vibrational spectrum

| # | mode | symmetry | wave number<br>cm**(-1) | IR intensity<br>km/mol | selection rules |       |
|---|------|----------|-------------------------|------------------------|-----------------|-------|
| # |      |          |                         |                        | IR              | RAMAN |
|   | 1    |          | 0.00                    | 0.00000                | -               | -     |
|   | 2    |          | 0.00                    | 0.00000                | -               | -     |
|   | 3    |          | 0.00                    | 0.00000                | -               | -     |
|   | 4    |          | 0.00                    | 0.00000                | -               | -     |
|   | 5    |          | 0.00                    | 0.00000                | -               | -     |
|   | 6    |          | 0.00                    | 0.00000                | -               | -     |
|   | 7    | a        | 143.62                  | 1.42402                | YES             | YES   |
|   | 8    | a        | 238.53                  | 21.17081               | YES             | YES   |
|   | 9    | a        | 284.76                  | 9.86618                | YES             | YES   |
|   | 10   | a        | 321.97                  | 65.34488               | YES             | YES   |
|   | 11   | a        | 459.49                  | 17.85979               | YES             | YES   |
|   | 12   | a        | 770.49                  | 11.50482               | YES             | YES   |
|   | 13   | a        | 803.12                  | 200.13669              | YES             | YES   |
|   | 14   | a        | 822.11                  | 128.91349              | YES             | YES   |
|   | 15   | a        | 945.89                  | 19.96233               | YES             | YES   |
|   | 16   | a        | 990.00                  | 18.01493               | YES             | YES   |
|   | 17   | a        | 1074.81                 | 15.70973               | YES             | YES   |
|   | 18   | a        | 1092.00                 | 4.86136                | YES             | YES   |
|   | 19   | a        | 1122.72                 | 2.30425                | YES             | YES   |
|   | 20   | a        | 1233.03                 | 8.03994                | YES             | YES   |
|   | 21   | a        | 1280.34                 | 10.26362               | YES             | YES   |

|    |   |         |           |     |     |
|----|---|---------|-----------|-----|-----|
| 22 | a | 1322.06 | 7.30029   | YES | YES |
| 23 | a | 1348.02 | 2.15091   | YES | YES |
| 24 | a | 1383.18 | 3.55631   | YES | YES |
| 25 | a | 1428.85 | 2.41996   | YES | YES |
| 26 | a | 1453.69 | 1.96652   | YES | YES |
| 27 | a | 1607.04 | 22.89082  | YES | YES |
| 28 | a | 1614.36 | 20.10656  | YES | YES |
| 29 | a | 2796.50 | 130.04398 | YES | YES |
| 30 | a | 2930.46 | 29.66559  | YES | YES |
| 31 | a | 2954.77 | 47.09360  | YES | YES |
| 32 | a | 2999.09 | 38.15234  | YES | YES |
| 33 | a | 3319.14 | 2.94822   | YES | YES |
| 34 | a | 3325.98 | 2.44491   | YES | YES |
| 35 | a | 3402.76 | 0.32029   | YES | YES |
| 36 | a | 3410.43 | 0.17064   | YES | YES |

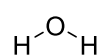

SCF Energy (au)BP86/SV(P) -76.34519822147  
 SCF Energy (au)PBE0/def2-TZVPP -76.379978209  
 SCF Energy (au)PBE0/def2-TZVPP -76.3919088408 (H<sub>2</sub>O Correction)  
 Zero Point Energy (au) 0.0199820  
 Chemical Potential (kJ mol<sup>-1</sup>) 5.89  
 Dispersion Correction (au) PBE0/def2-TZVPP -0.00027693

xyz coordinates  
3

|   |            |           |            |
|---|------------|-----------|------------|
| O | 0.0000000  | 0.0000000 | 0.4047790  |
| H | -0.7707436 | 0.0000000 | -0.2023895 |
| H | 0.7707436  | 0.0000000 | -0.2023895 |

\$vibrational spectrum

| # | mode | symmetry | wave number<br>cm**(-1) | IR intensity<br>km/mol | selection rules |       |
|---|------|----------|-------------------------|------------------------|-----------------|-------|
| # |      |          |                         |                        | IR              | RAMAN |
|   | 1    |          | 0.00                    | 0.00000                | -               | -     |
|   | 2    |          | 0.00                    | 0.00000                | -               | -     |
|   | 3    |          | 0.00                    | 0.00000                | -               | -     |
|   | 4    |          | 0.00                    | 0.00000                | -               | -     |
|   | 5    |          | 0.00                    | 0.00000                | -               | -     |
|   | 6    |          | 0.00                    | 0.00000                | -               | -     |
|   | 7    | a1       | 1604.11                 | 62.01507               | YES             | YES   |
|   | 8    | a1       | 3526.34                 | 0.10597                | YES             | YES   |
|   | 9    | b1       | 3640.63                 | 16.46475               | YES             | YES   |

## References

- 1 Z. Shi, P. Peng, D. Strohecker and Y. Liao, *J. Am. Chem. Soc.*, 2011, **133**, 14699–14703.
- 2 X. Duan, Q. Ruan, Q. Gan, X. Song, S. Fang, X. Zhang and J. Zhang, *J. Organomet. Chem.*, 2018, **868**, 154–163.
- 3 K. Li, C. Weidman and J. Gao, *Org. Lett.*, 2018, **20**, 20–23.
- 4 K. K. H. Vong, S. Maeda and K. Tanaka, *Chem. - A Eur. J.*, 2016, **22**, 18865–18872.
- 5 M. K. Islam, S. Kim, H. K. Kim, S. Park, G. H. Lee, H. J. Kang, J. C. Jung, J. S. Park, T. J. Kim and Y. Chang, *J. Med. Chem.*, 2017, **60**, 2993–3001.
- 6 R. K. Varshnaya and P. Banerjee, *European J. Org. Chem.*, 2016, **2016**, 4059–4066.
- 7 L. Bollans, J. Bacsá, J. A. Iggo, G. A. Morris and A. V. Stachulski, *Org. Biomol. Chem.*, 2009, **7**, 4531–4538.
- 8 A. Weickgenannt, J. Mohr and M. Oestreich, *Tetrahedron*, 2012, **68**, 3468–3479.
- 9 J. Gao, B. Zhao, M. Wang, M. A. C. Serrano, J. Zhuang, M. Ray, V. M. Rotello, R. W. Vachet and S. Thayumanavan, *J. Am. Chem. Soc.*, 2018, **140**, 2421–2425.
- 10 S. Nazreen, M. S. Alam, H. Hamid, M. S. Yar, A. Dhulap, P. Alam, M. A. Q. Pasha, S. Bano, M. M. Alam, S. Haider, C. Kharbanda, Y. Ali and K. Pillai, *Arch. Pharm. (Weinheim)*, 2015, **348**, 421–432.
- 11 H. Gu, T. I. Chio, Z. Lei, R. J. Staples, J. S. Hirschi and S. Bane, *Org. Biomol. Chem.*, 2017, **15**, 7543–7548.
- 12 P. Császár and P. Pulay, *J. Mol. Struct.*, 1984, **114**, 31–34.
- 13 R. Ahlrichs, M. Bär, M. Häser, H. Horn and C. Kölmel, *Chem. Phys. Lett.*, 1989, **162**, 165–169.
- 14 P. Deglmann, F. Furche and R. Ahlrichs, *Chem. Phys. Lett.*, 2002, **362**, 511–518.
- 15 P. Deglmann, K. May, F. Furche and R. Ahlrichs, *Chem. Phys. Lett.*, 2004, **384**, 103–107.
- 16 K. Eichkorn, O. Treutler, H. Öhm, M. Häser and R. Ahlrichs, *Chem. Phys. Lett.*, 1995, **242**, 652–660.
- 17 K. Eichkorn, F. Weigend, O. Treutler and R. Ahlrichs, *Theor. Chem. Acc.*, 1997, **97**,

- 119–124.
- 18 O. Treutler and R. Ahlrichs, *J. Chem. Phys.*, 1995, **102**, 346–354.
- 19 M. Von Arnim and R. Ahlrichs, *J. Chem. Phys.*, 1999, **111**, 9183–9190.
- 20 A. Klamt and G. Schüürmann, *J. Chem. Soc. Perkin Trans. 2*, 1993, 799–805.
- 21 S. Niu, D. L. Strout, S. Zarić, C. A. Bayse and M. B. Hall, *Organometallics*, 1998, **17**, 5139–5147.

# <sup>1</sup>H NMR (400 MHz, MeOD)

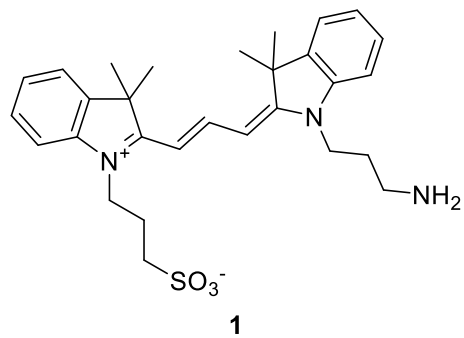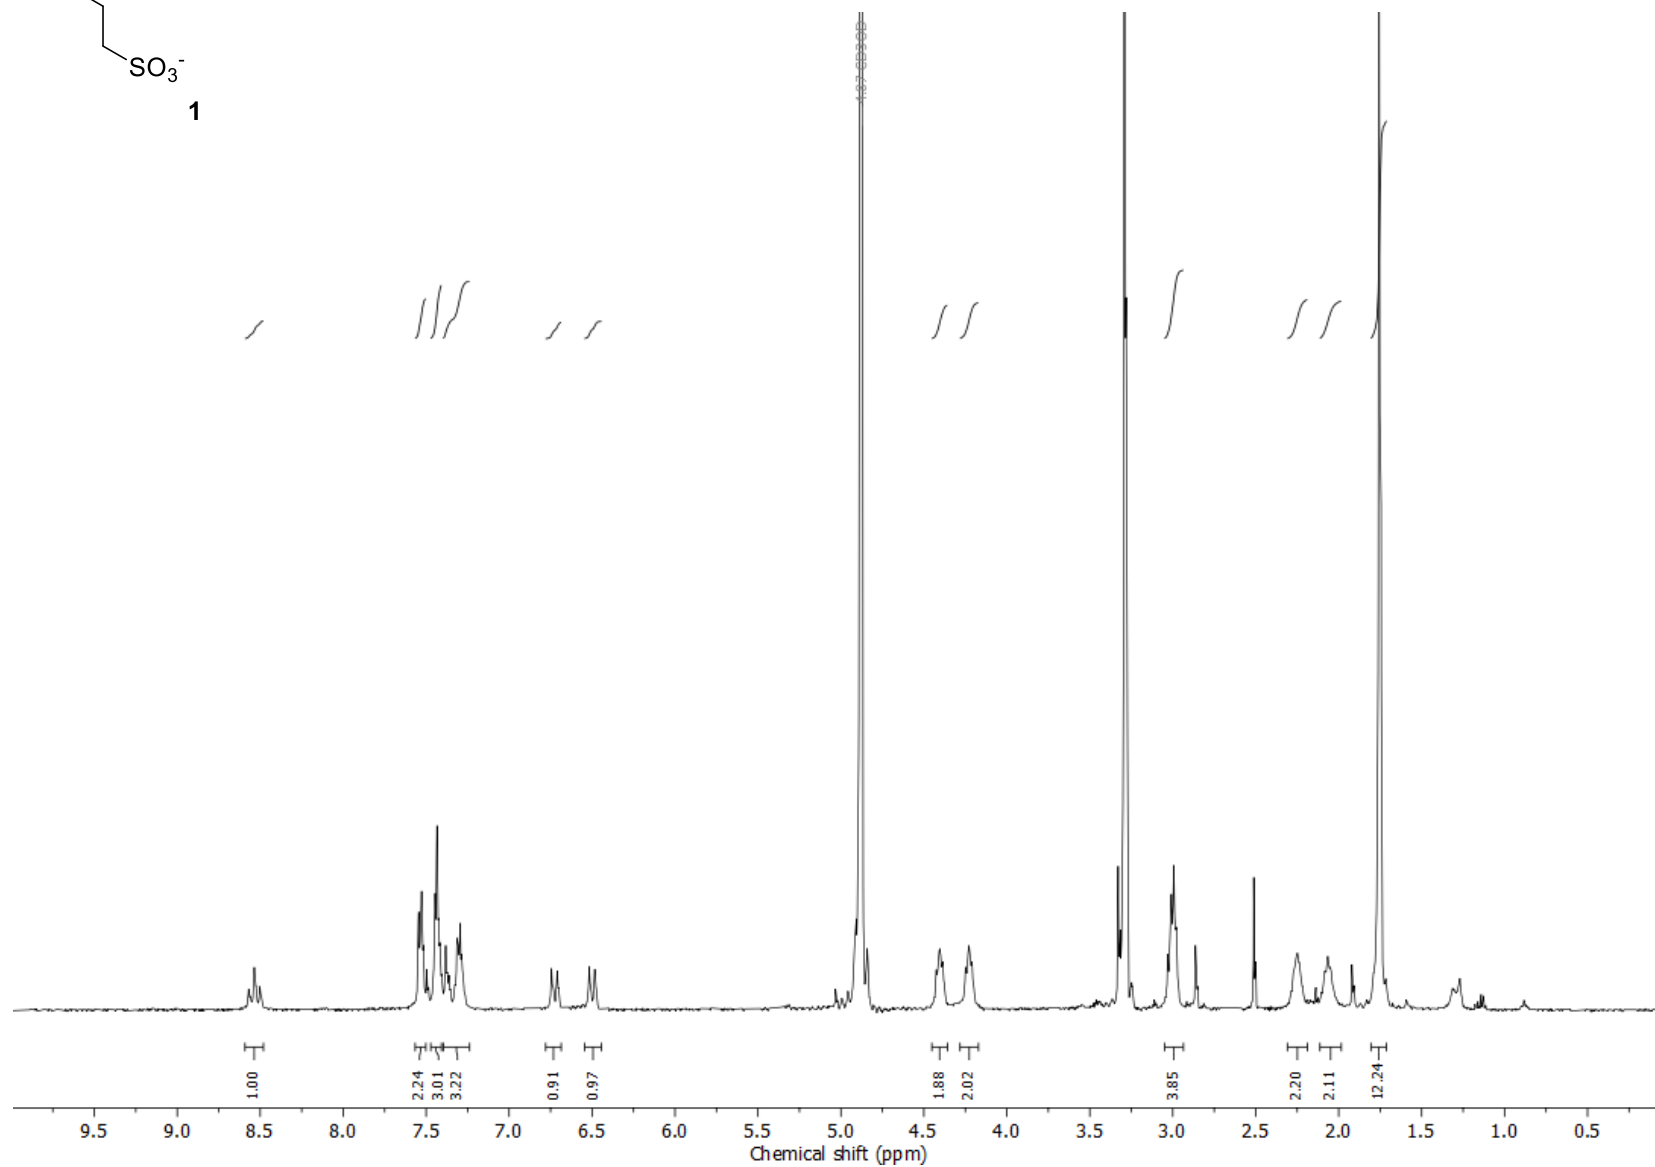

# $^{13}\text{C}$ NMR (100 MHz, MeOD)

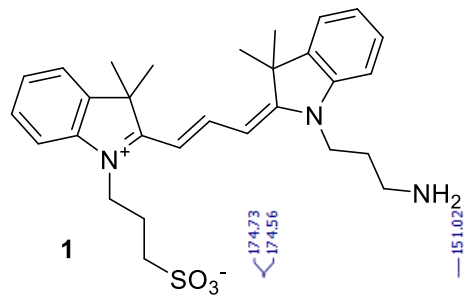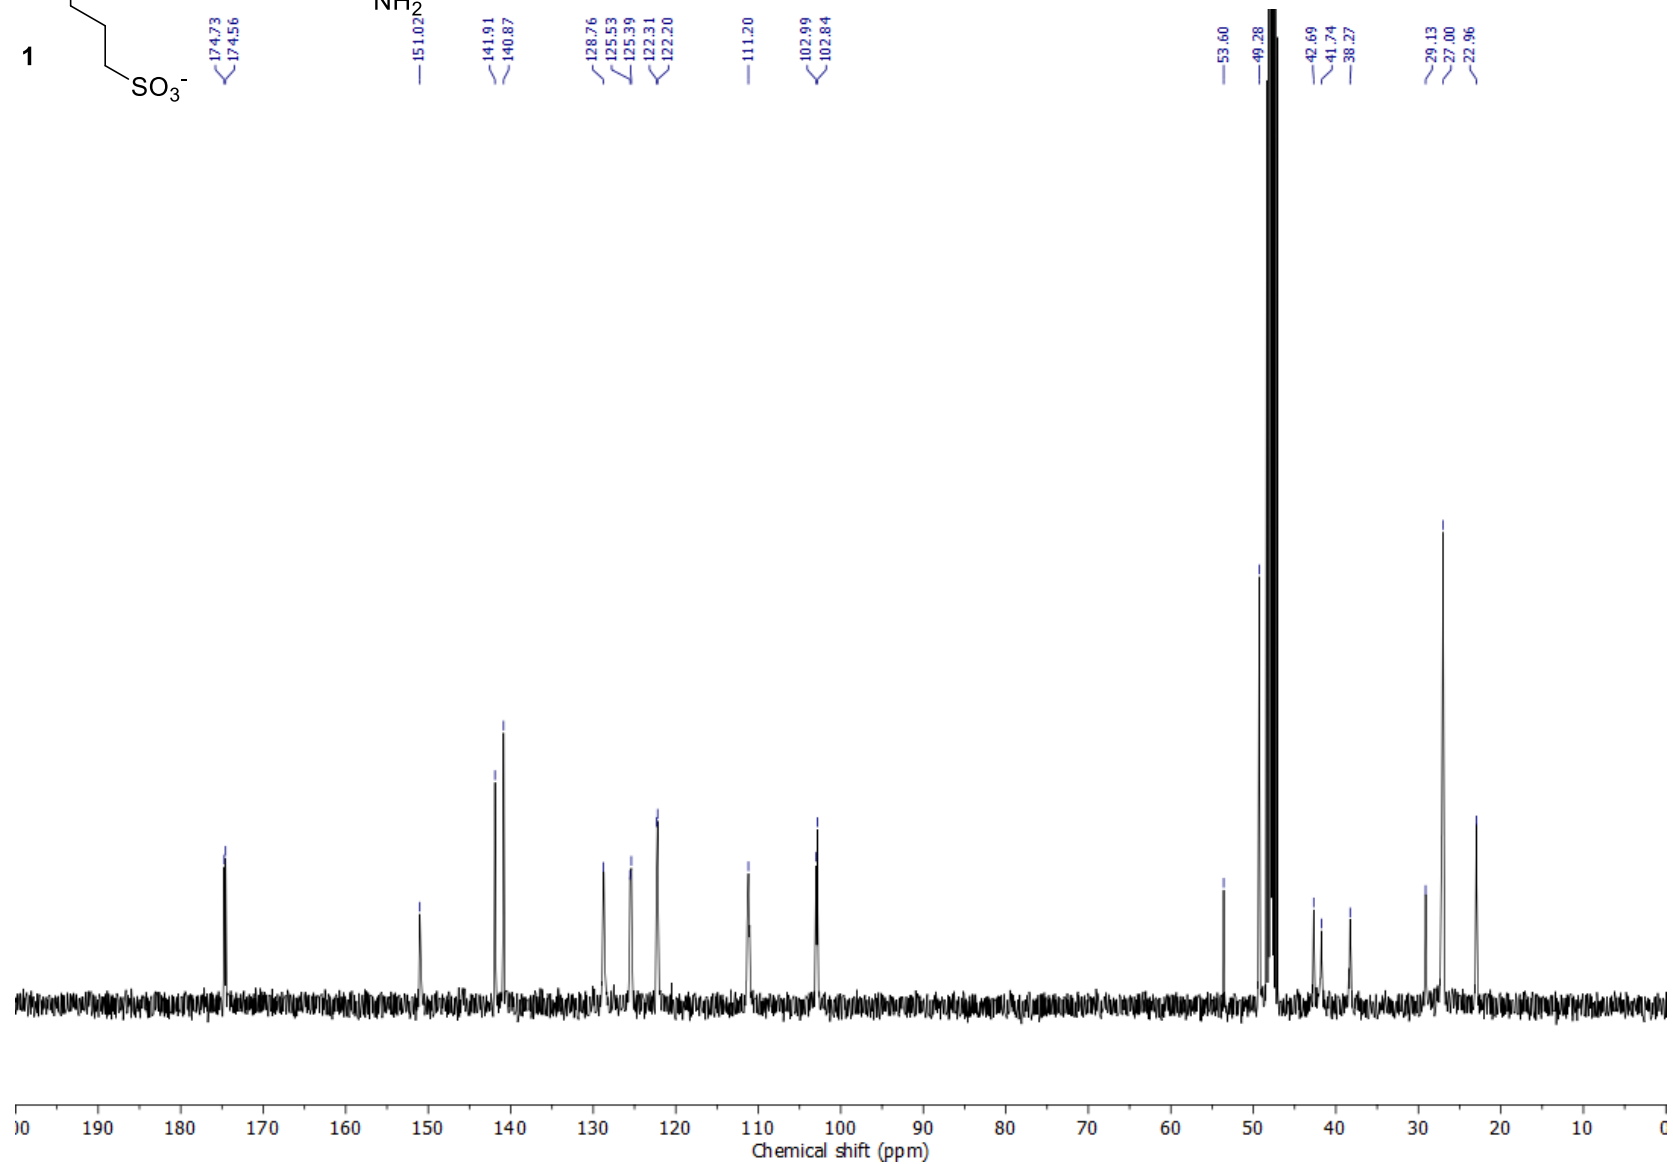

# <sup>1</sup>H NMR (400 MHz, MeOD)

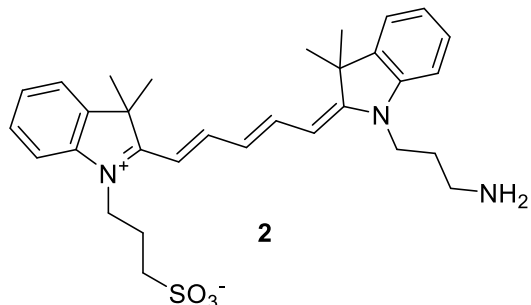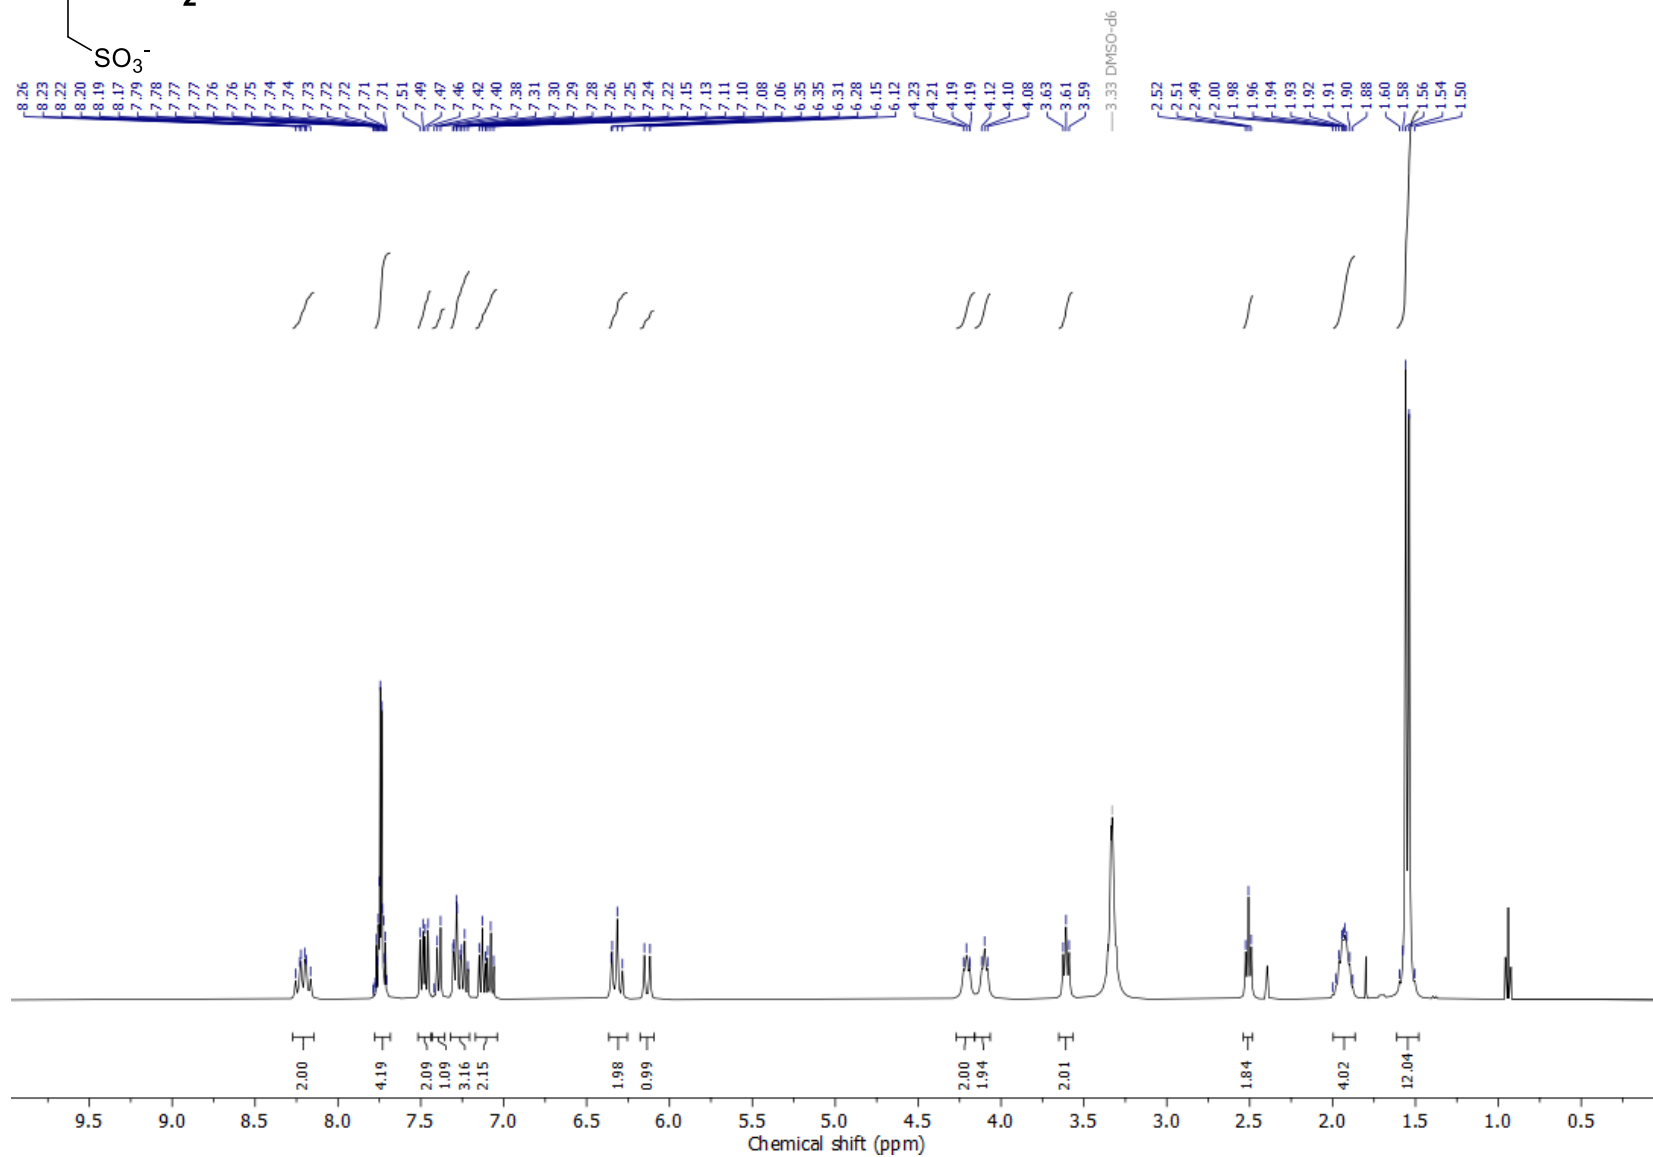

# <sup>13</sup>C NMR (100 MHz, MeOD)

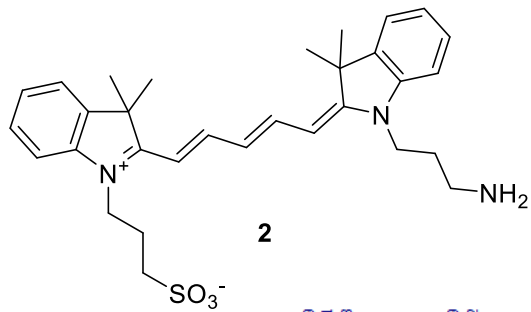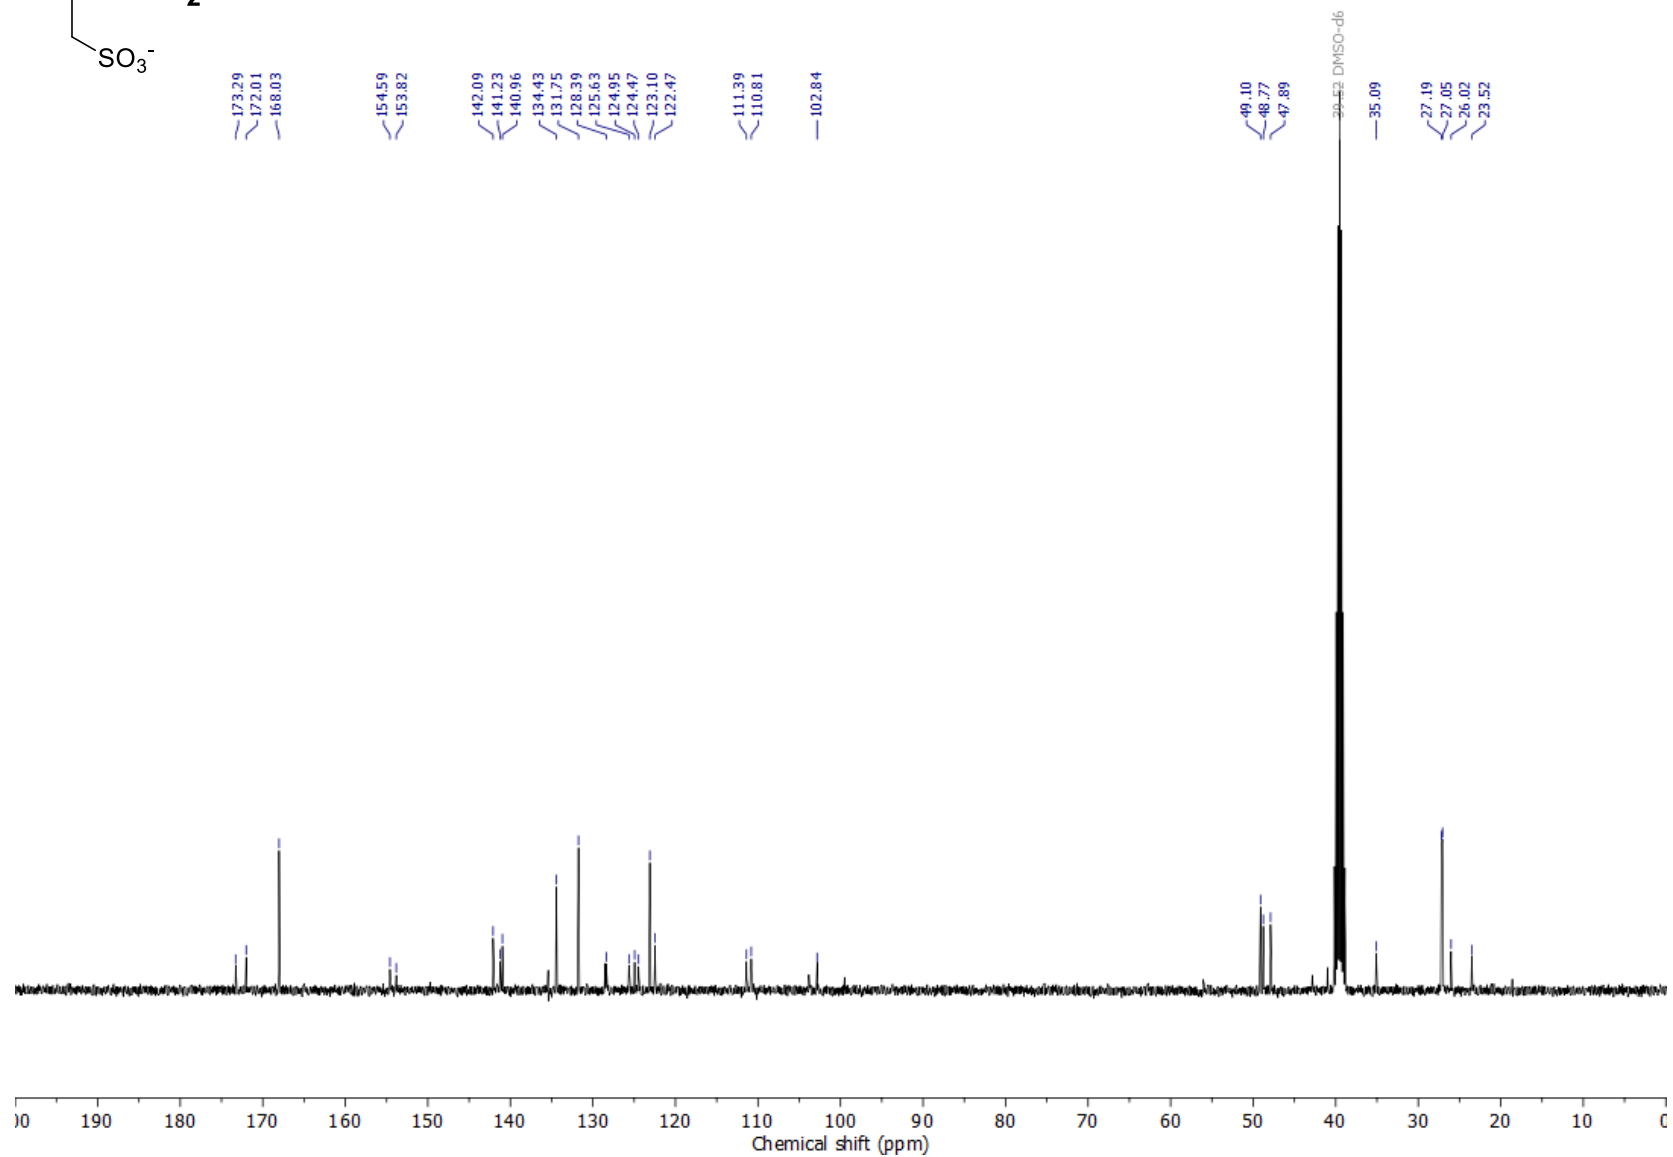

# <sup>1</sup>H NMR (400 MHz, MeOD)

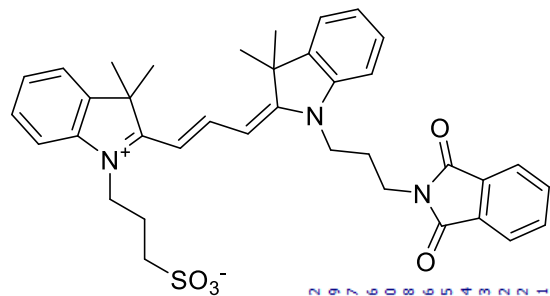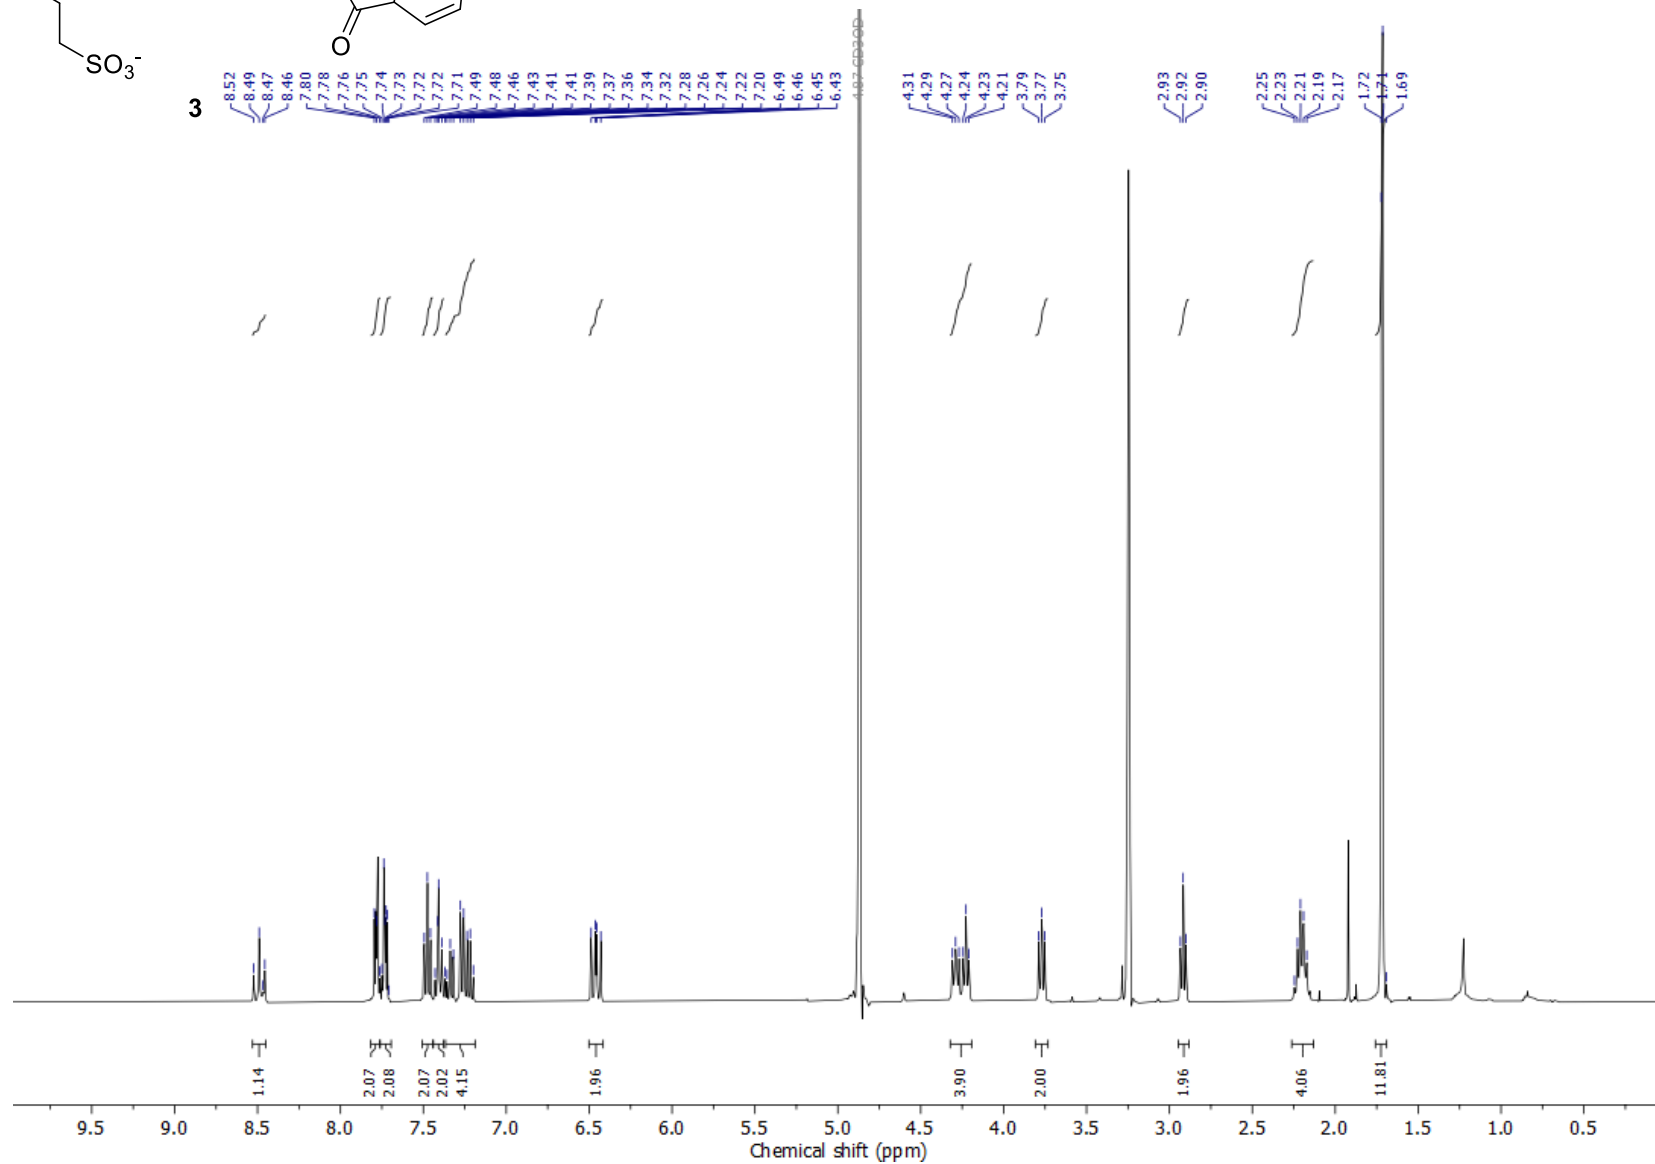

# <sup>13</sup>C NMR (100 MHz, MeOD)

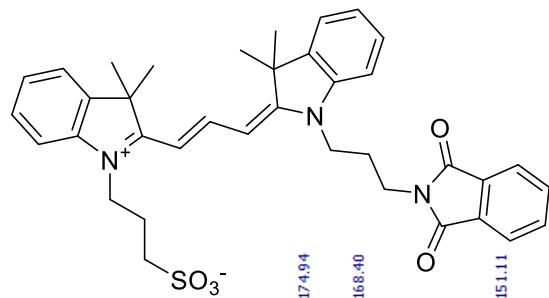

3

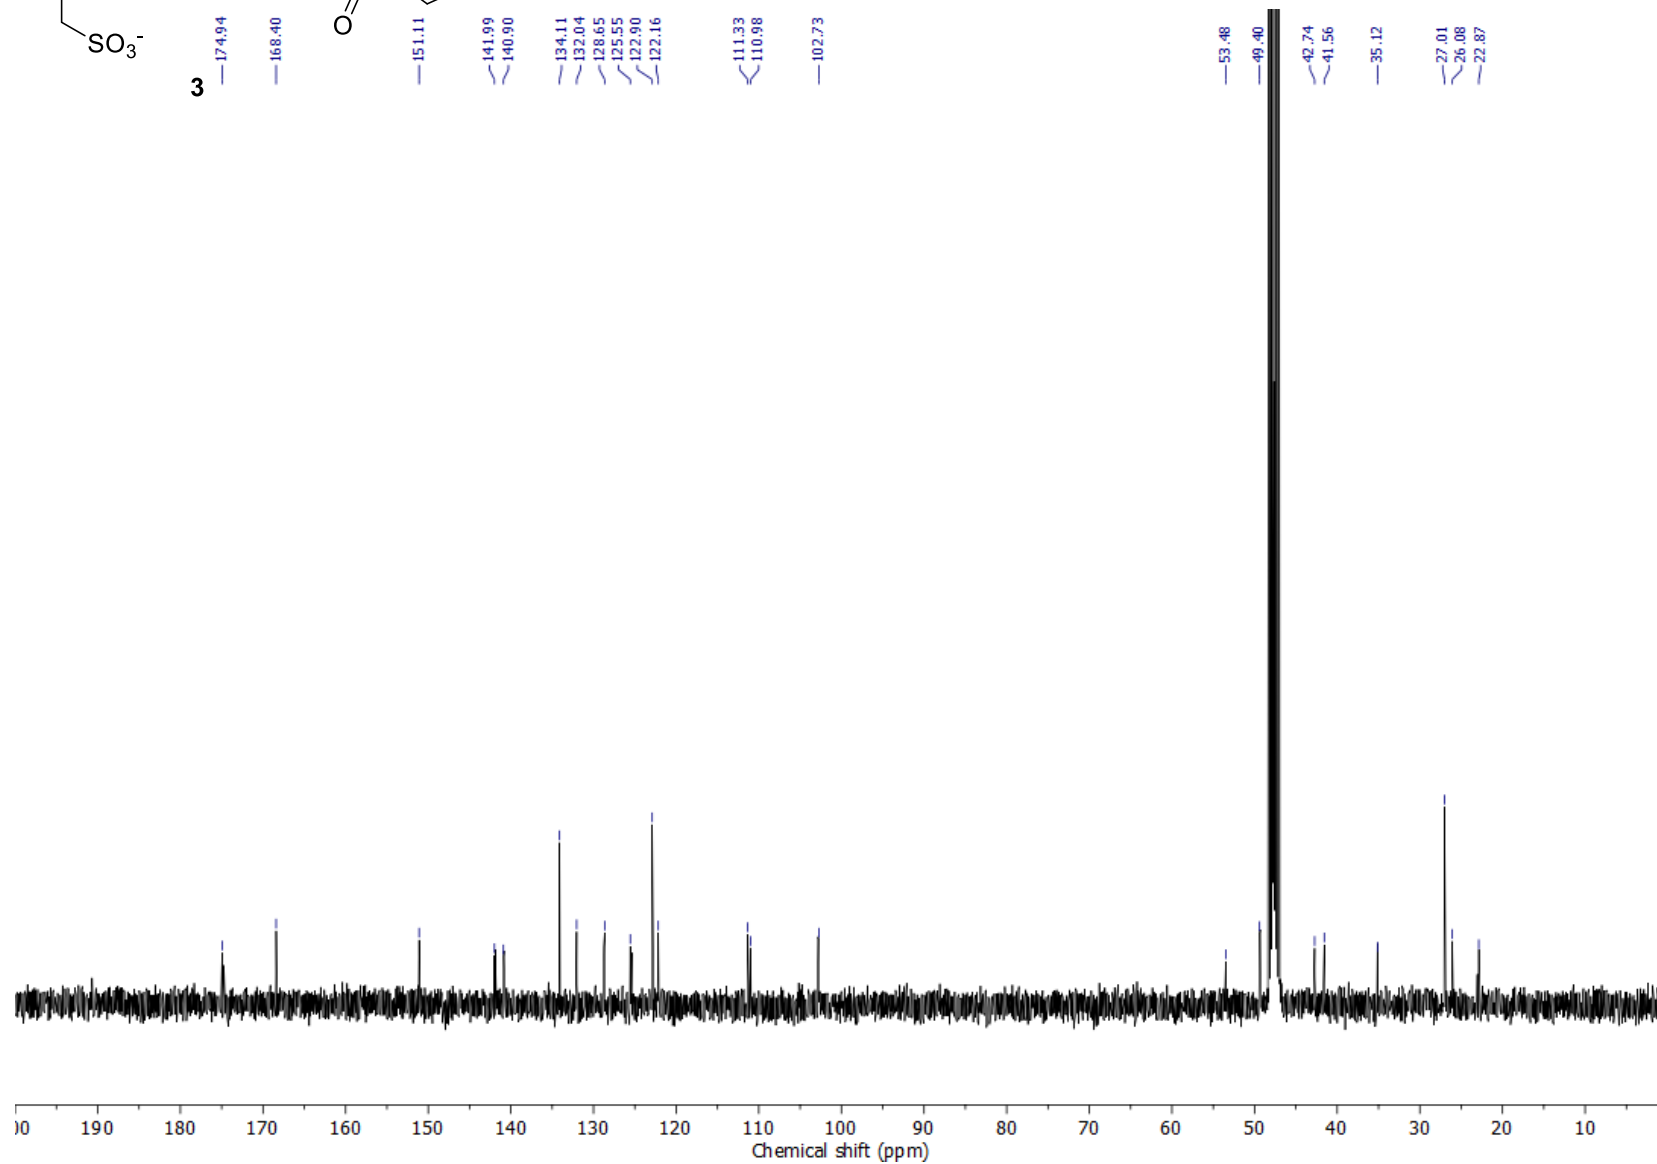

# <sup>1</sup>H NMR (400 MHz, MeOD)

4

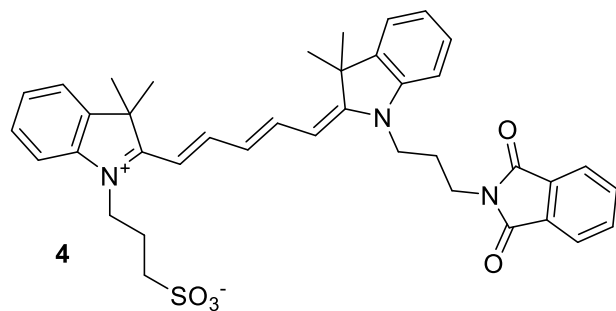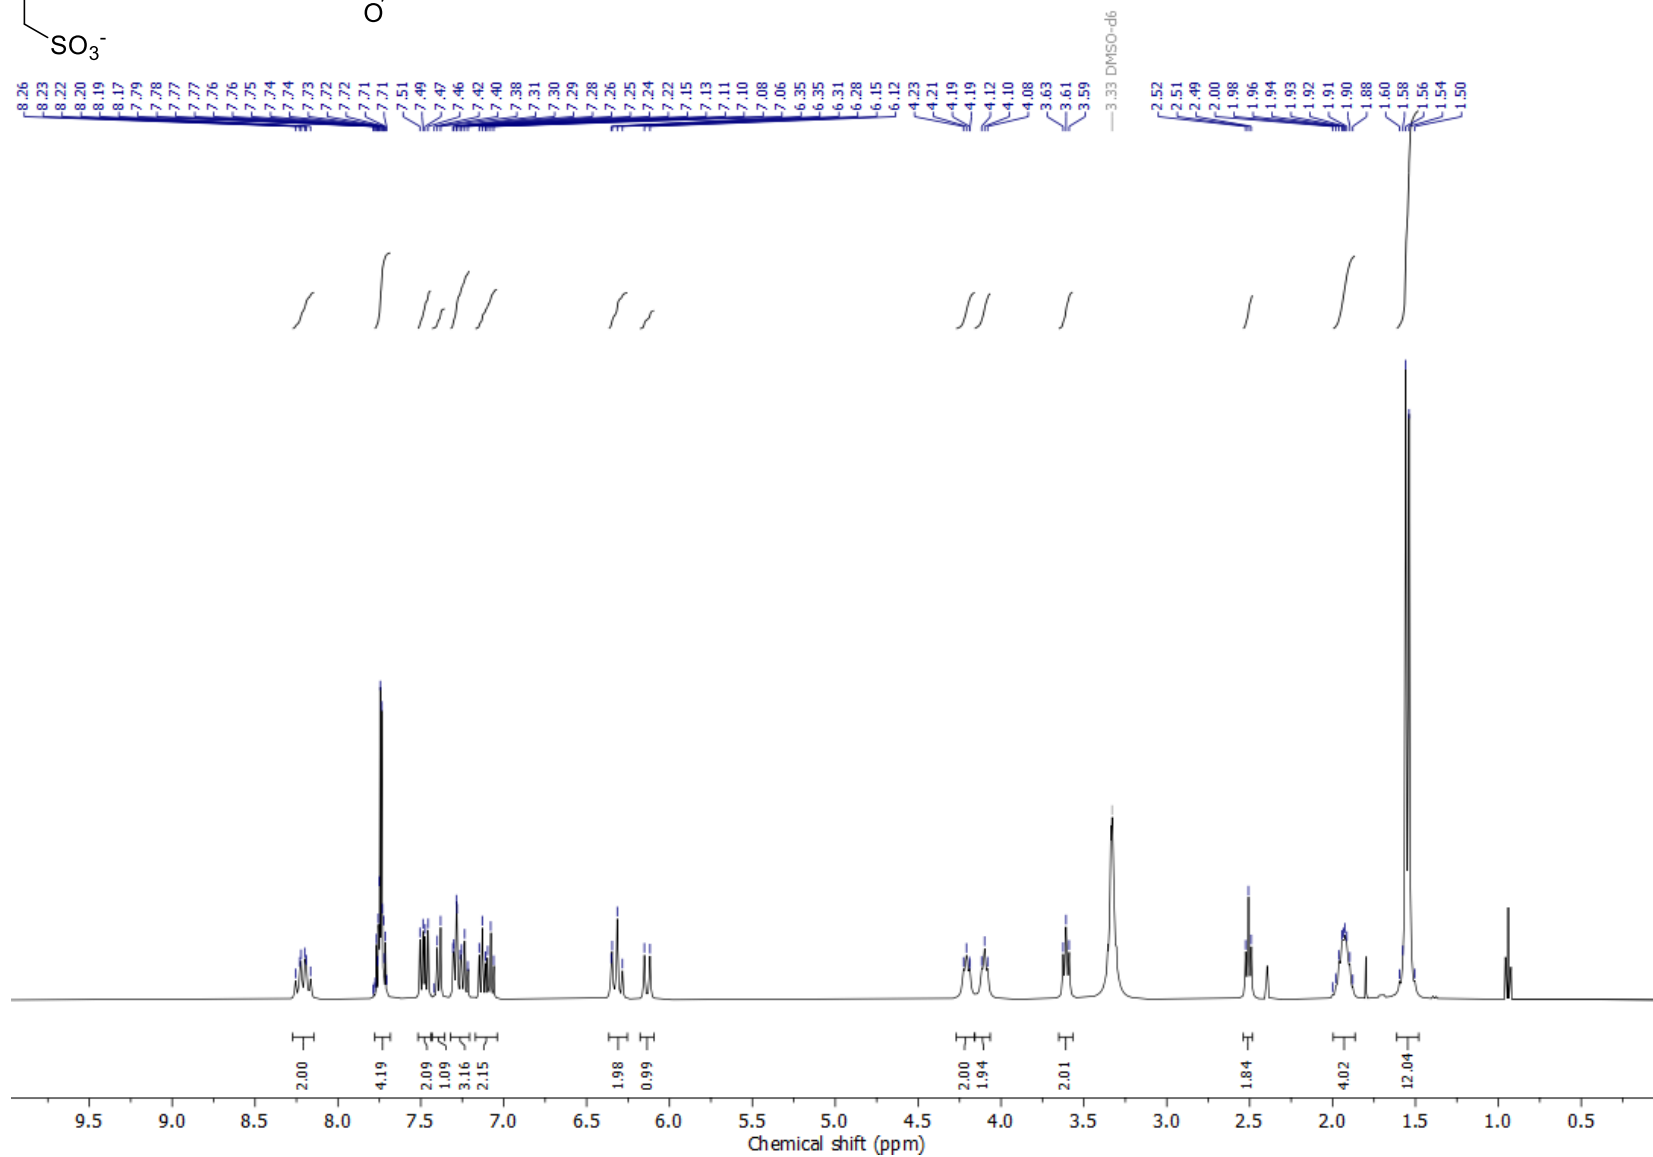

# <sup>13</sup>C NMR (100 MHz, MeOD)

4

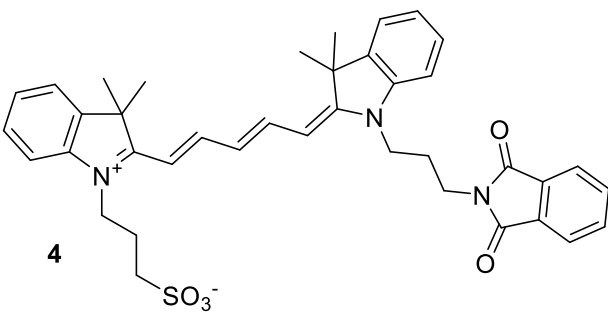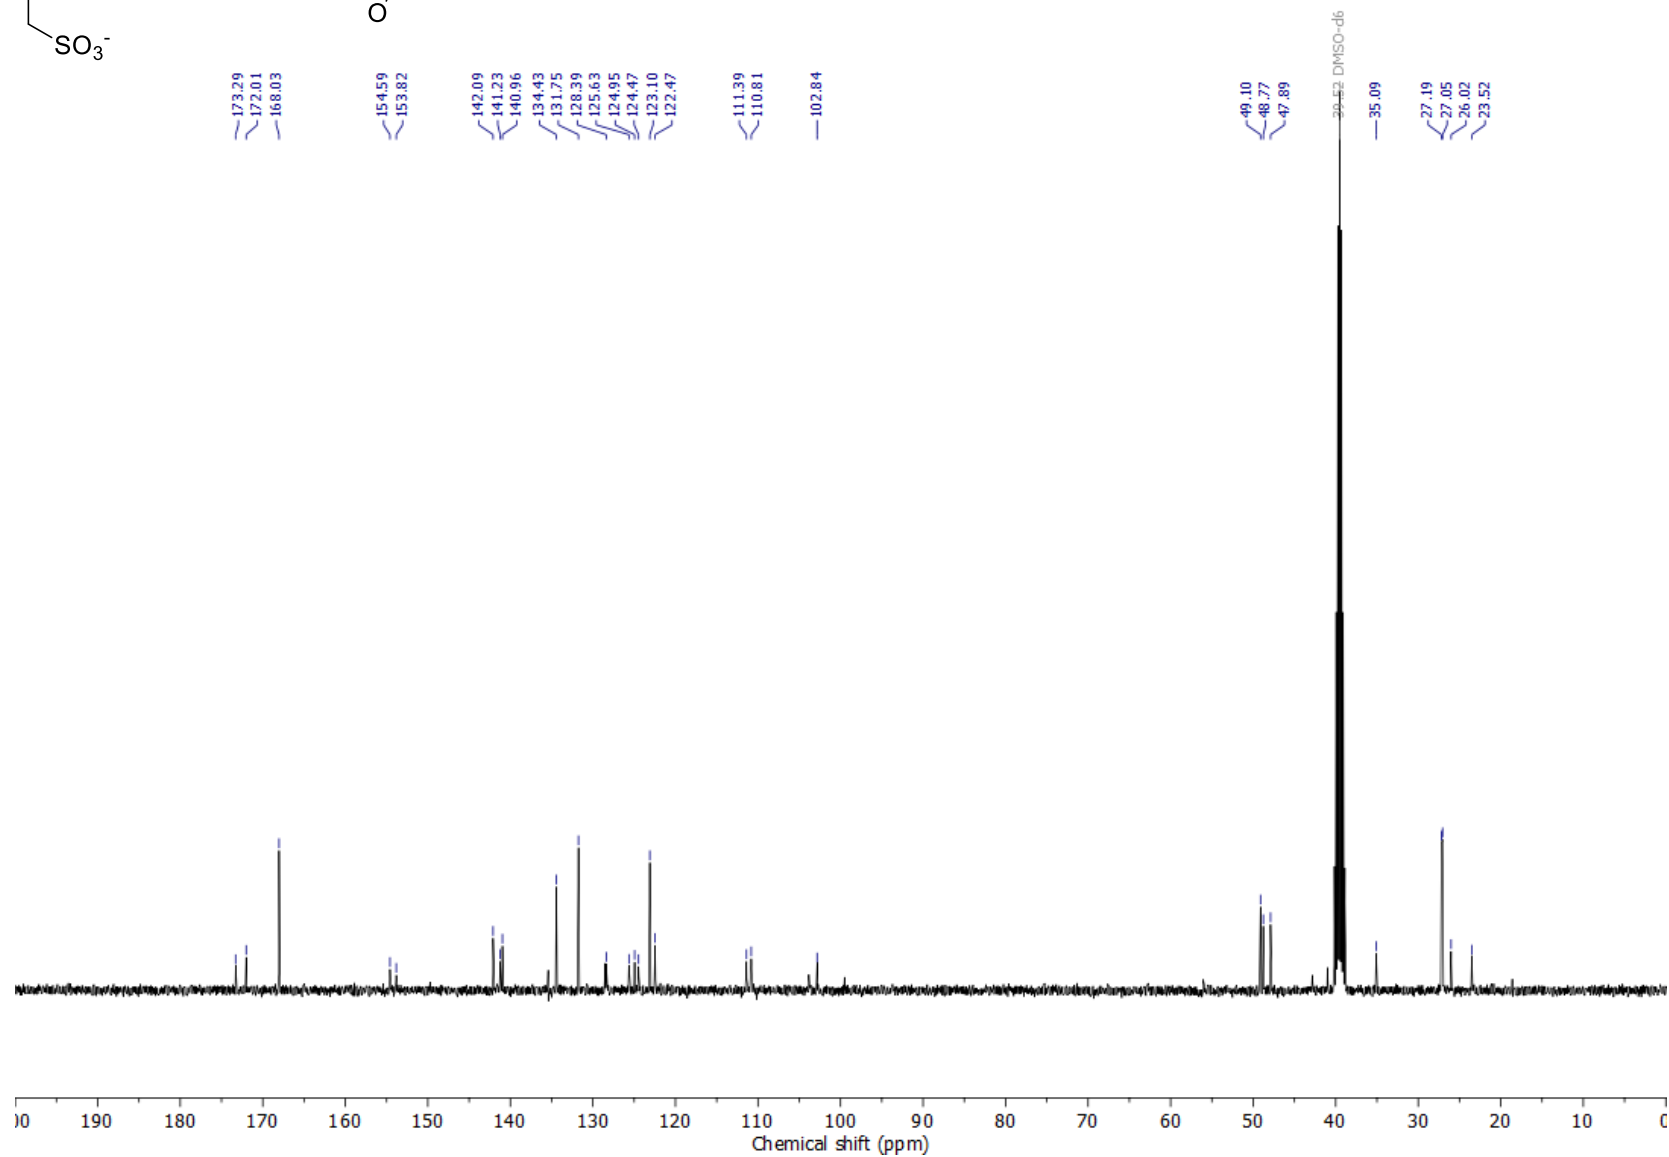

# $^1\text{H}$ NMR (600 MHz, MeOD)

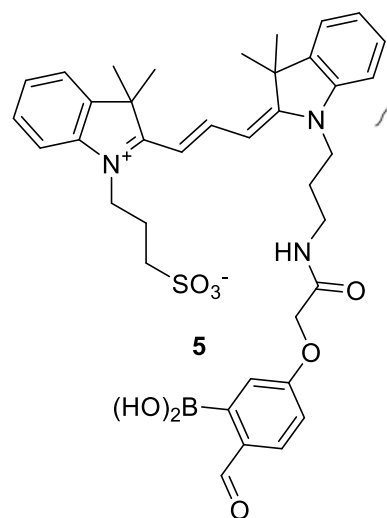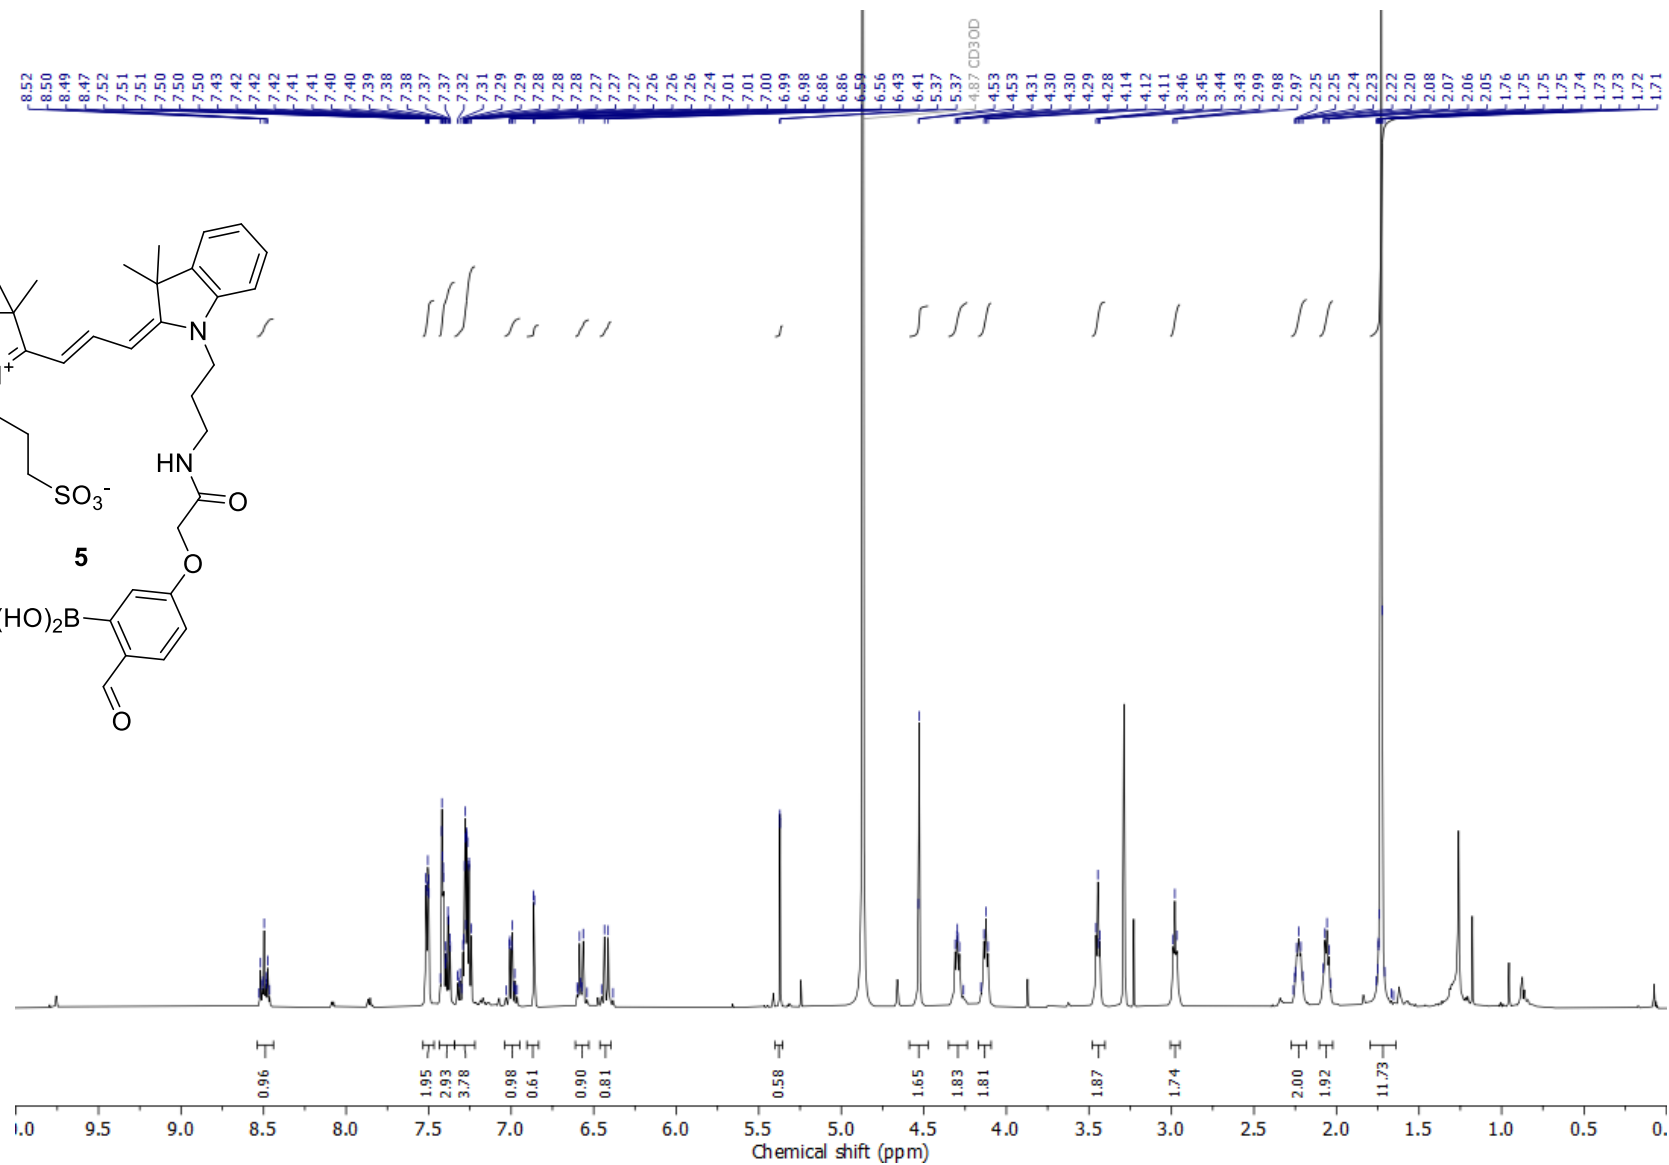

# $^{13}\text{C}$ NMR(600 MHz, MeOD)

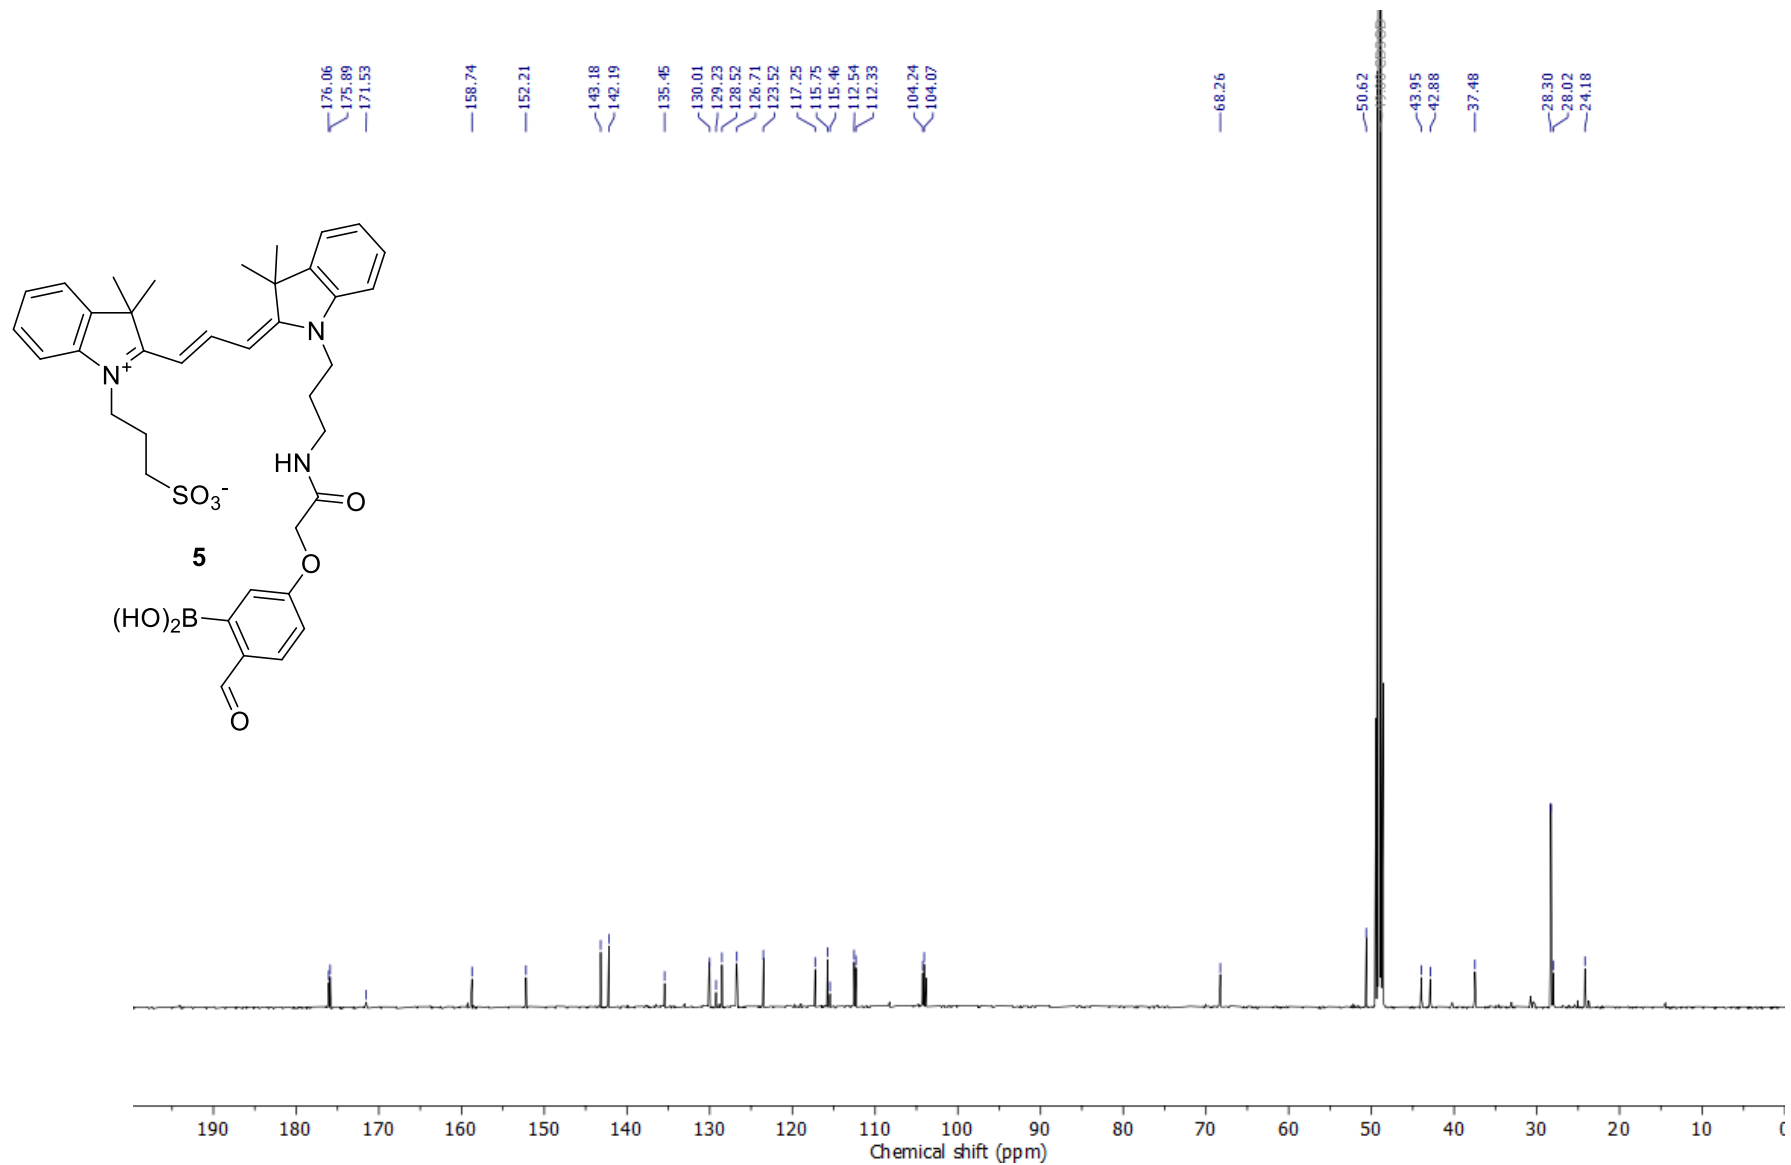

# $^1\text{H}$ NMR (400 MHz, MeOD)

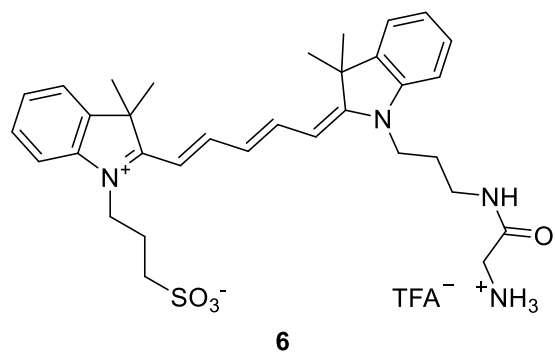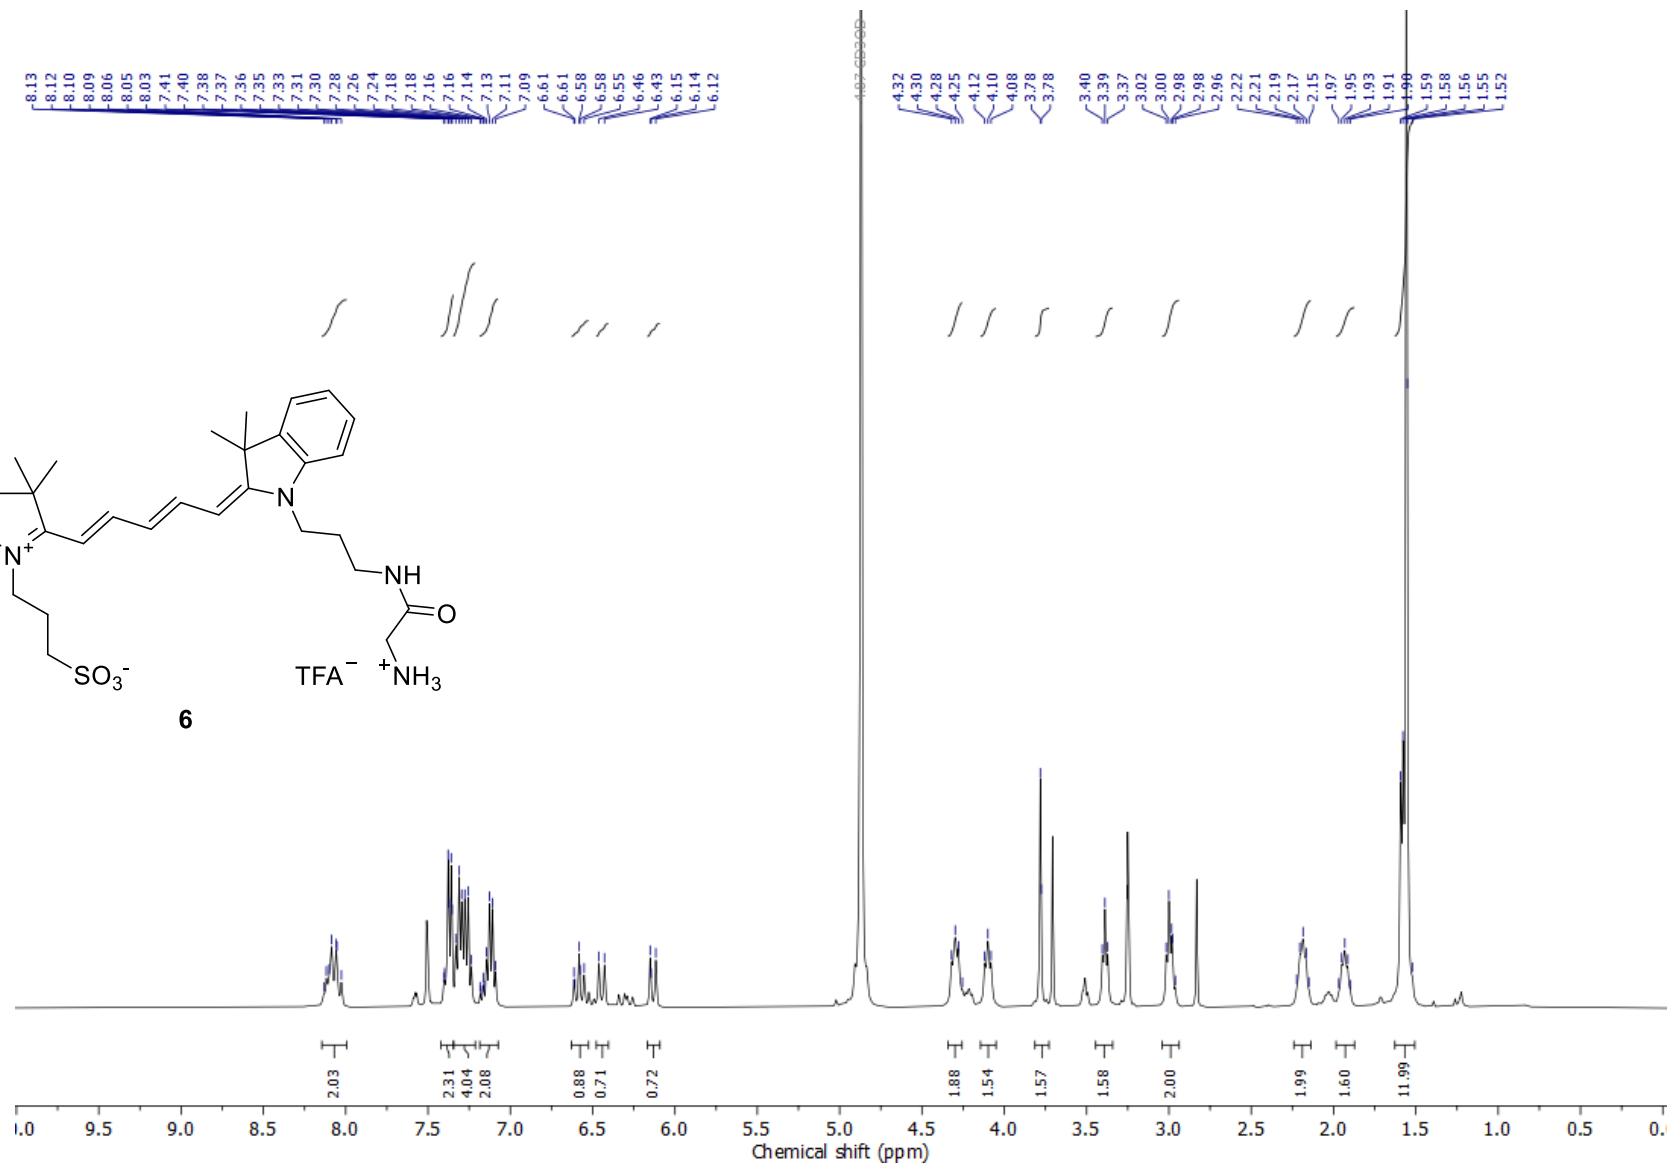

# $^{13}\text{C}$ NMR (100 MHz, MeOD)

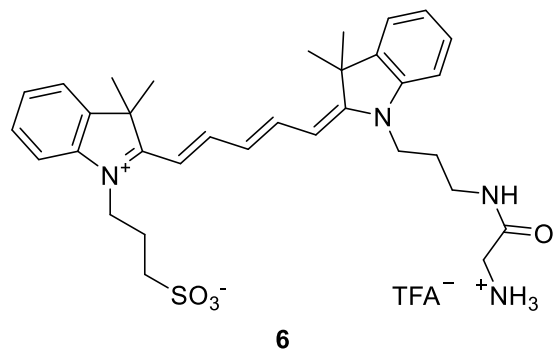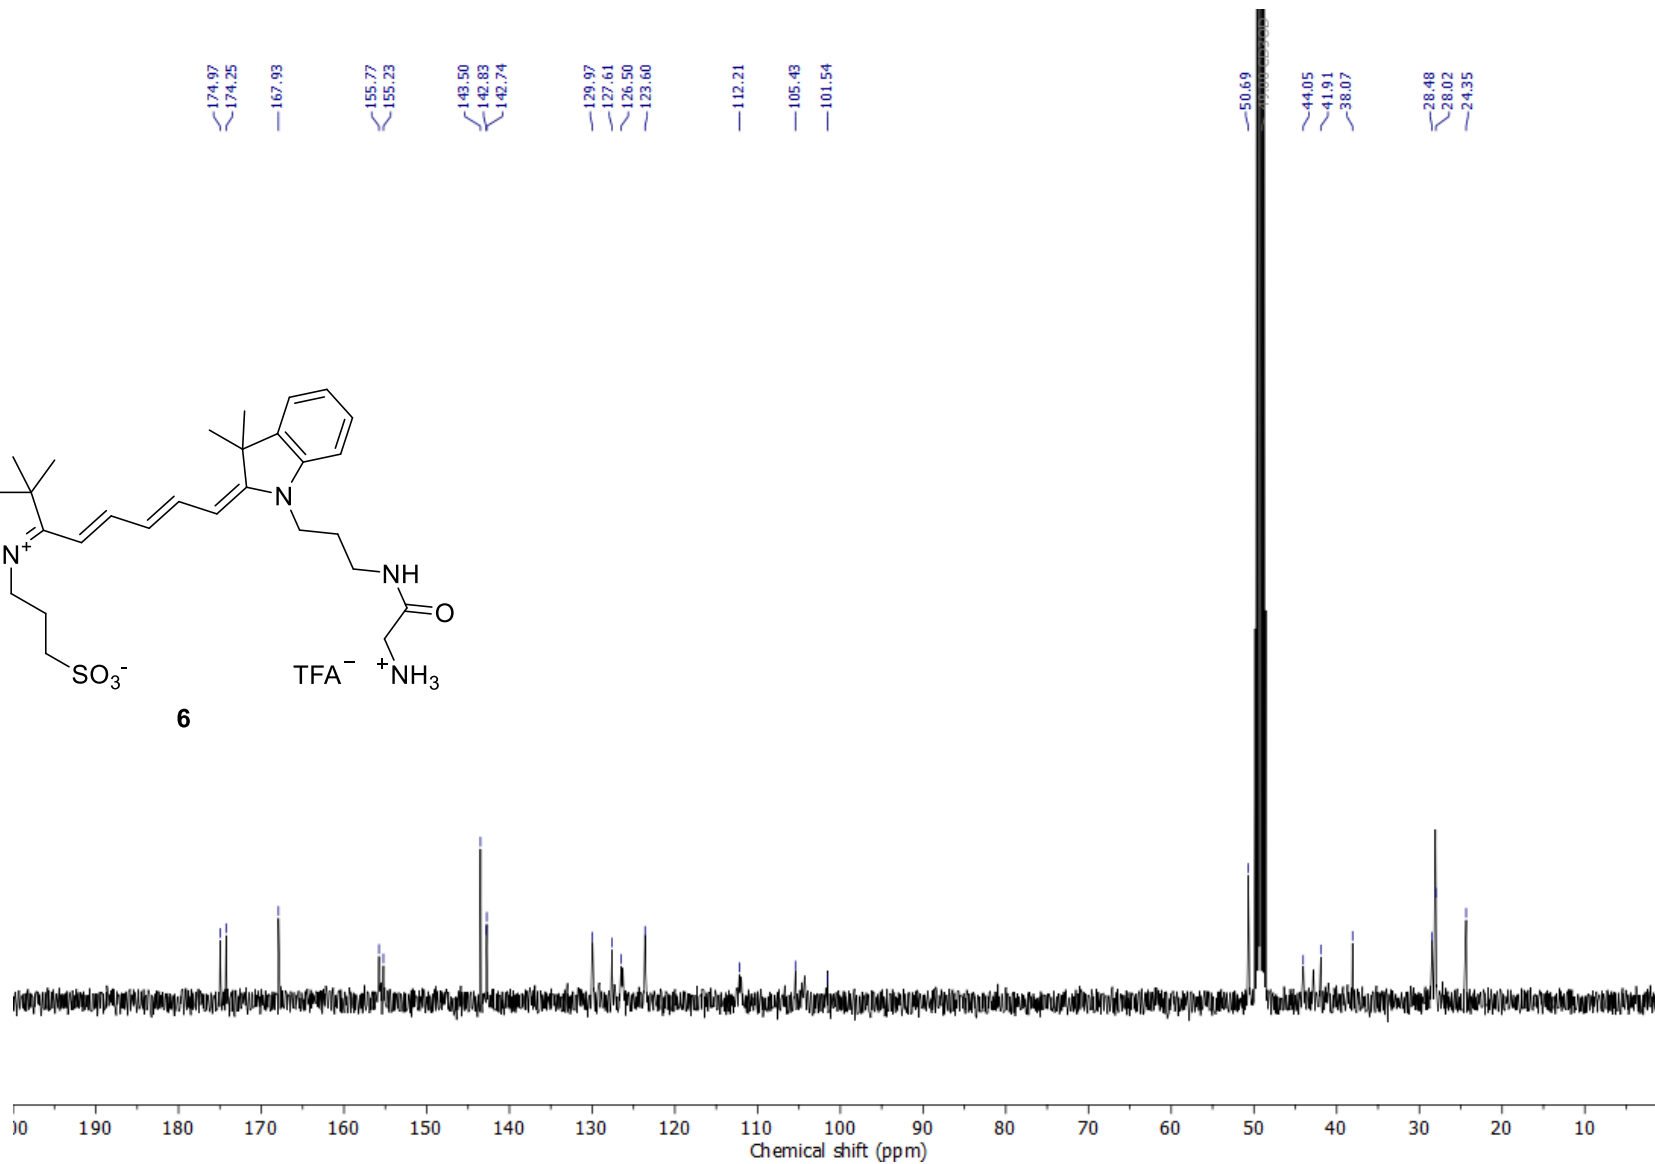

# $^1\text{H}$ NMR (400 MHz, MeOD)

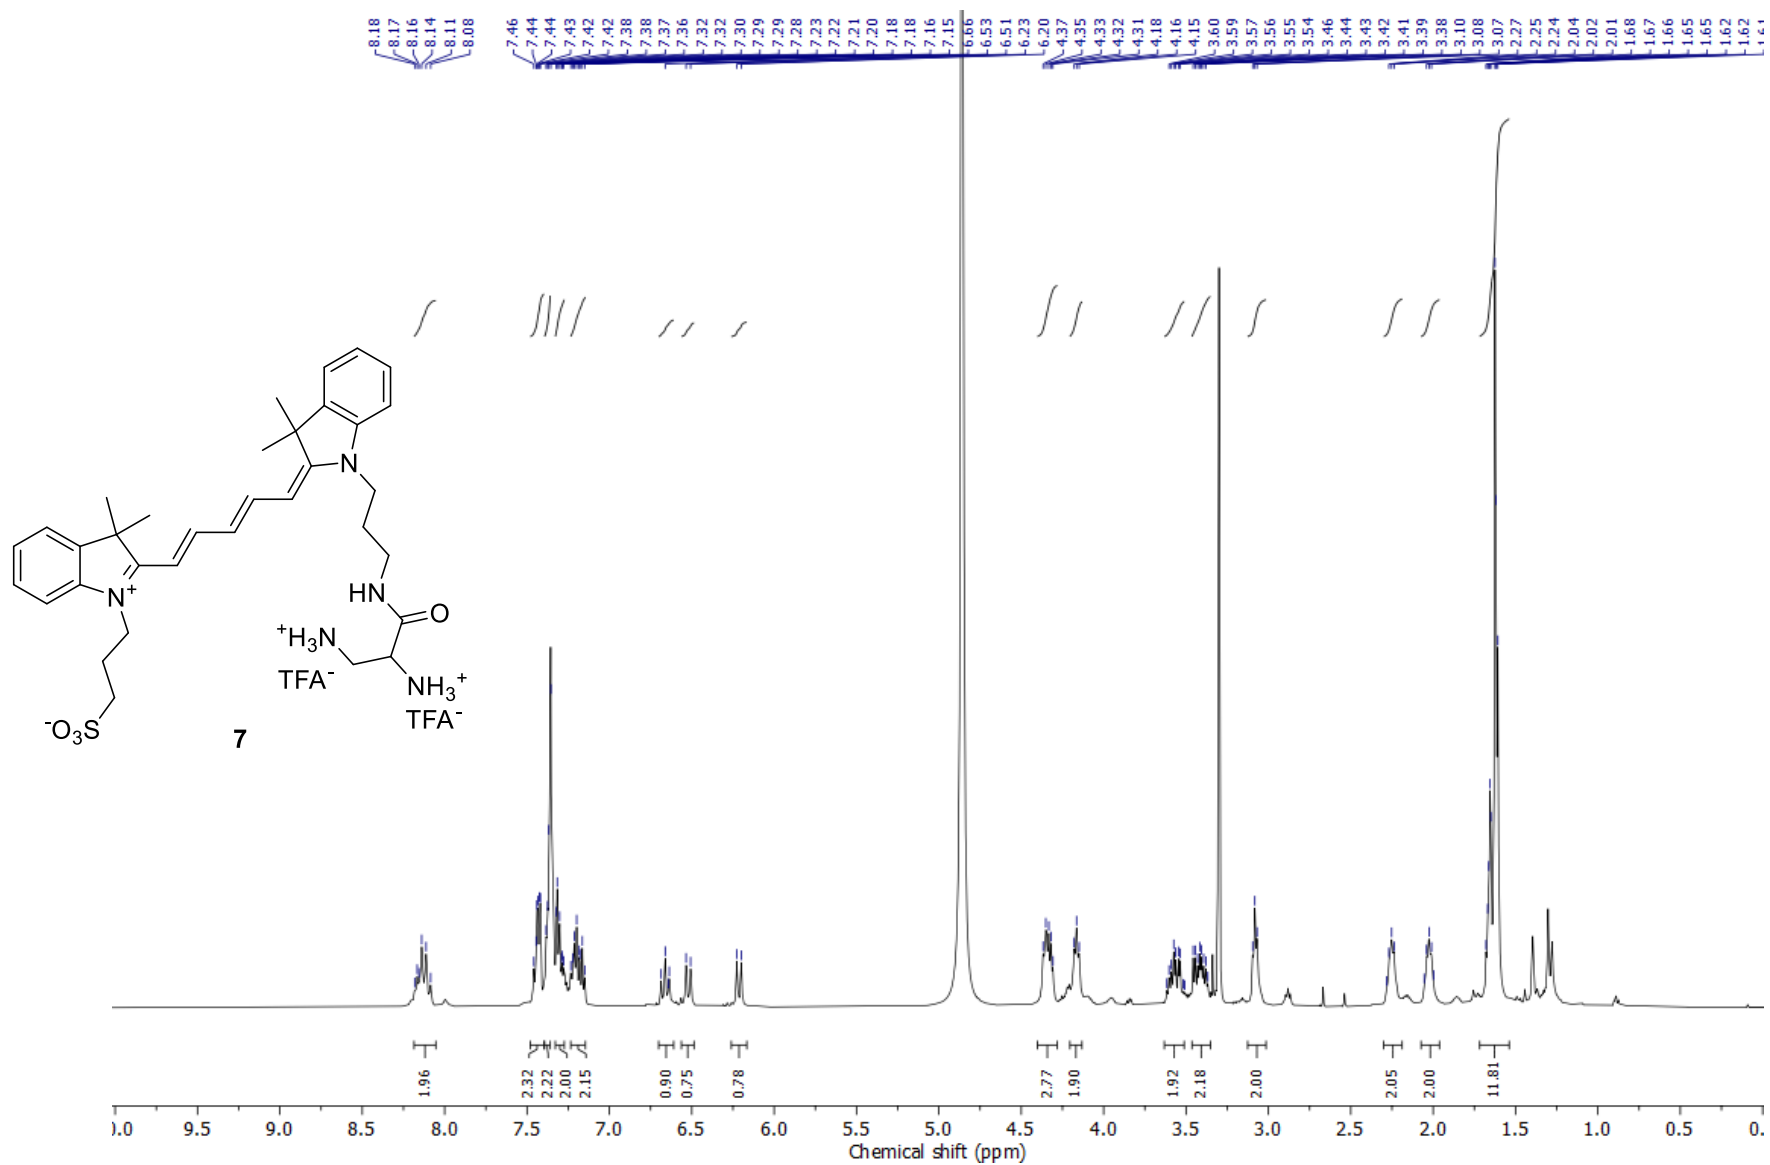

$^{13}\text{C}$  NMR (100 MHz, MeOD)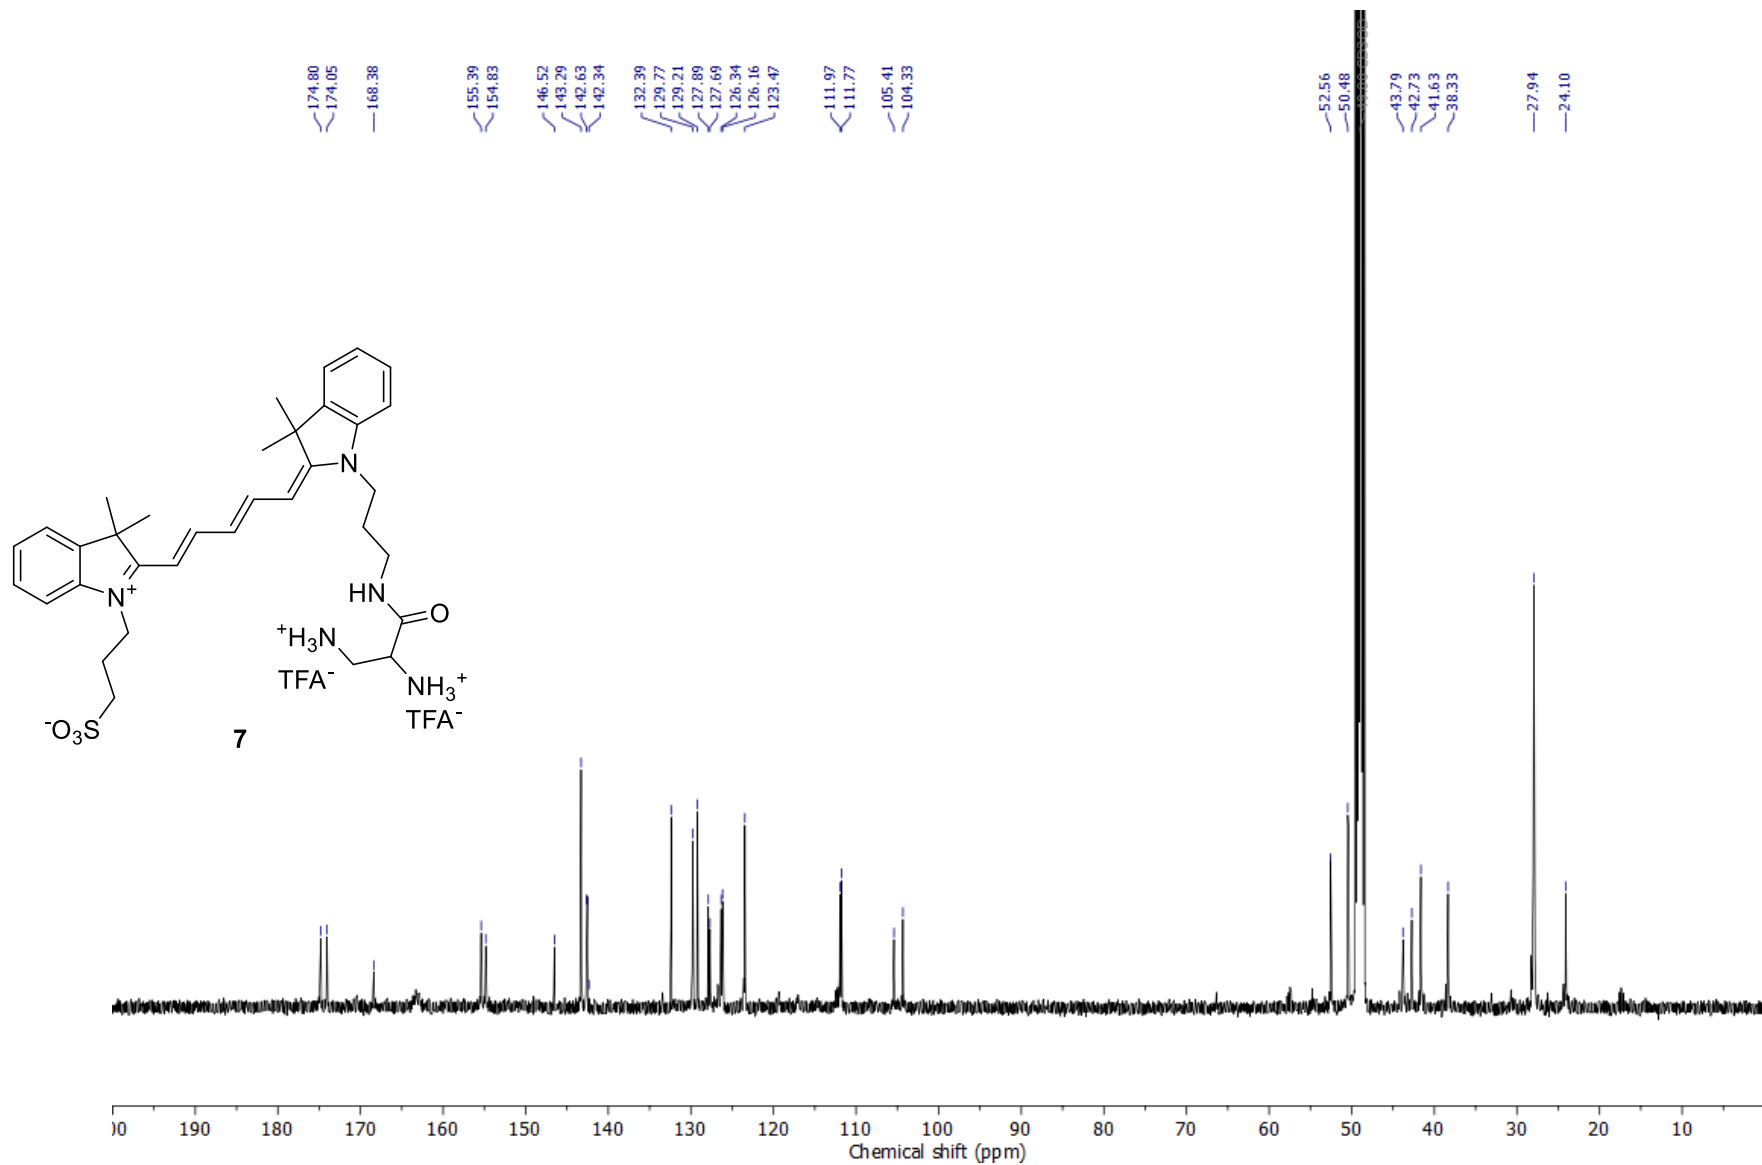

# $^1\text{H}$ NMR (400 MHz, MeOD)

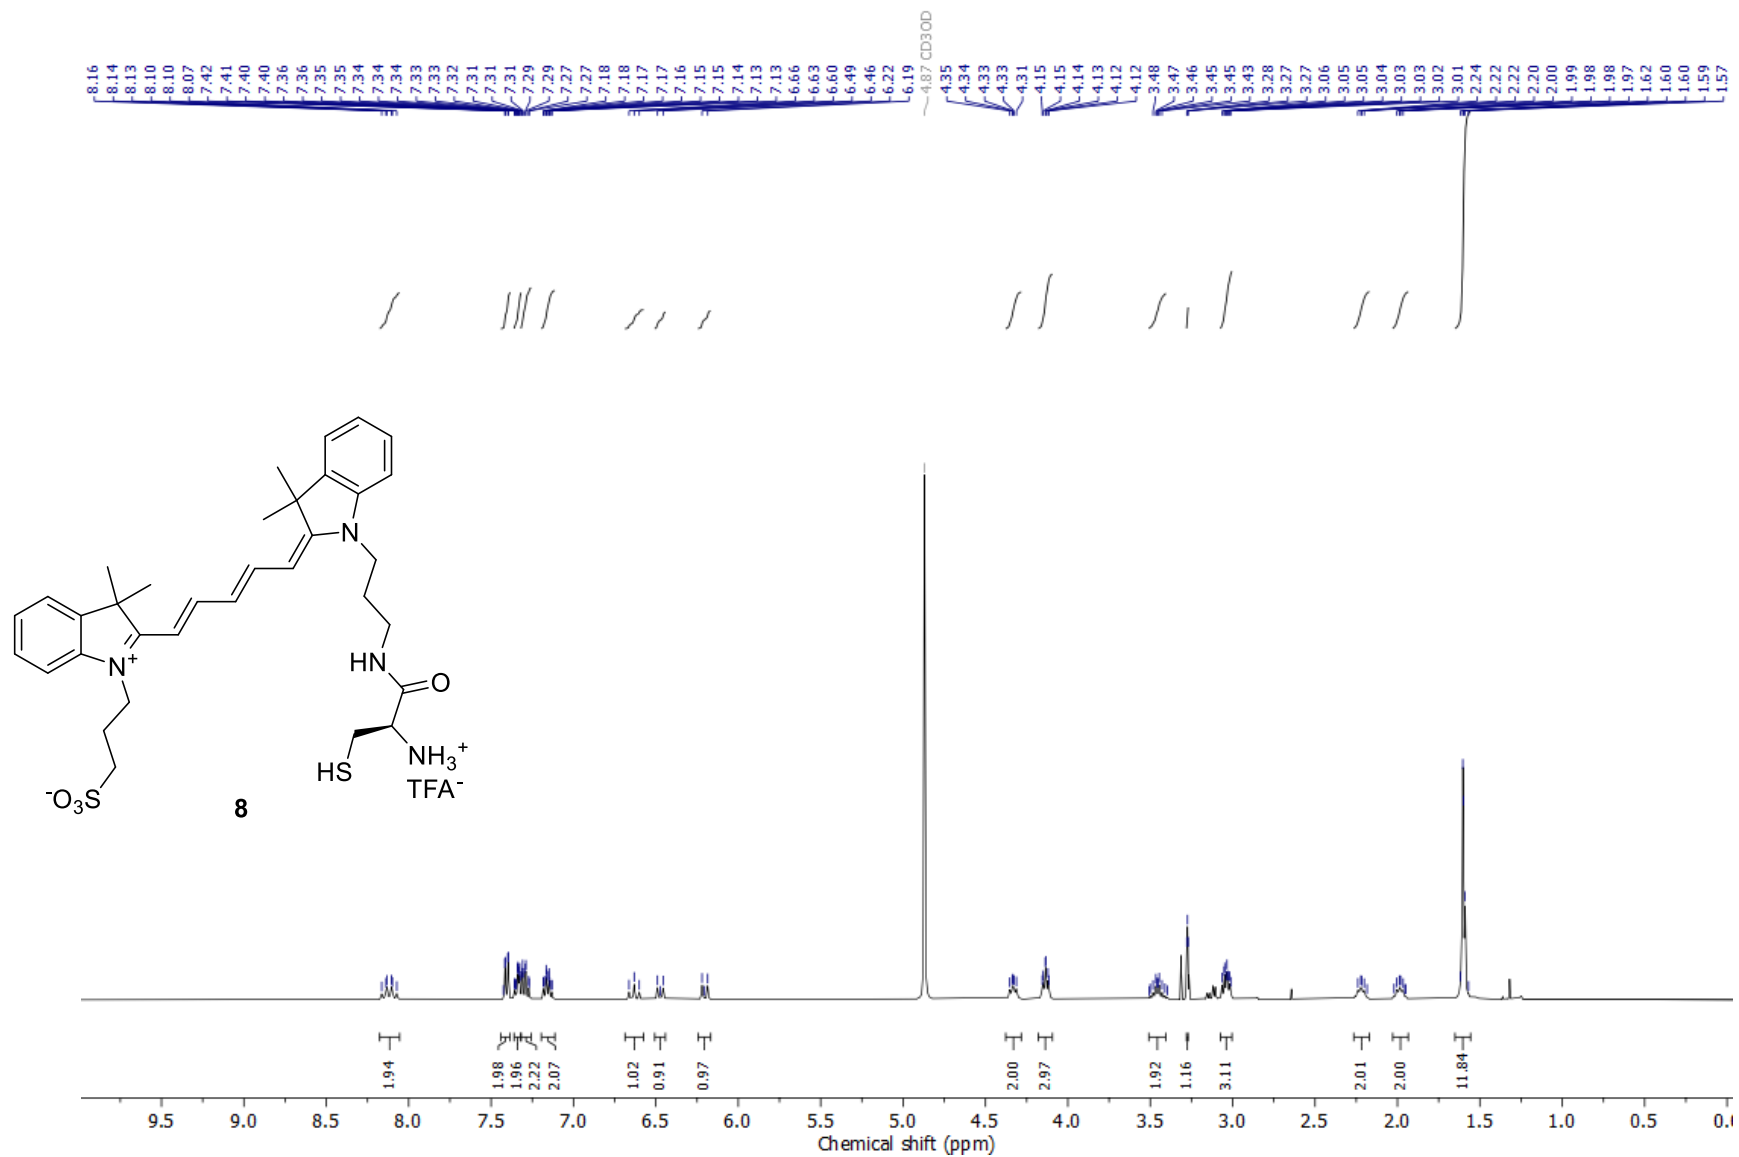

# $^{13}\text{C}$ NMR (100 MHz, MeOD)

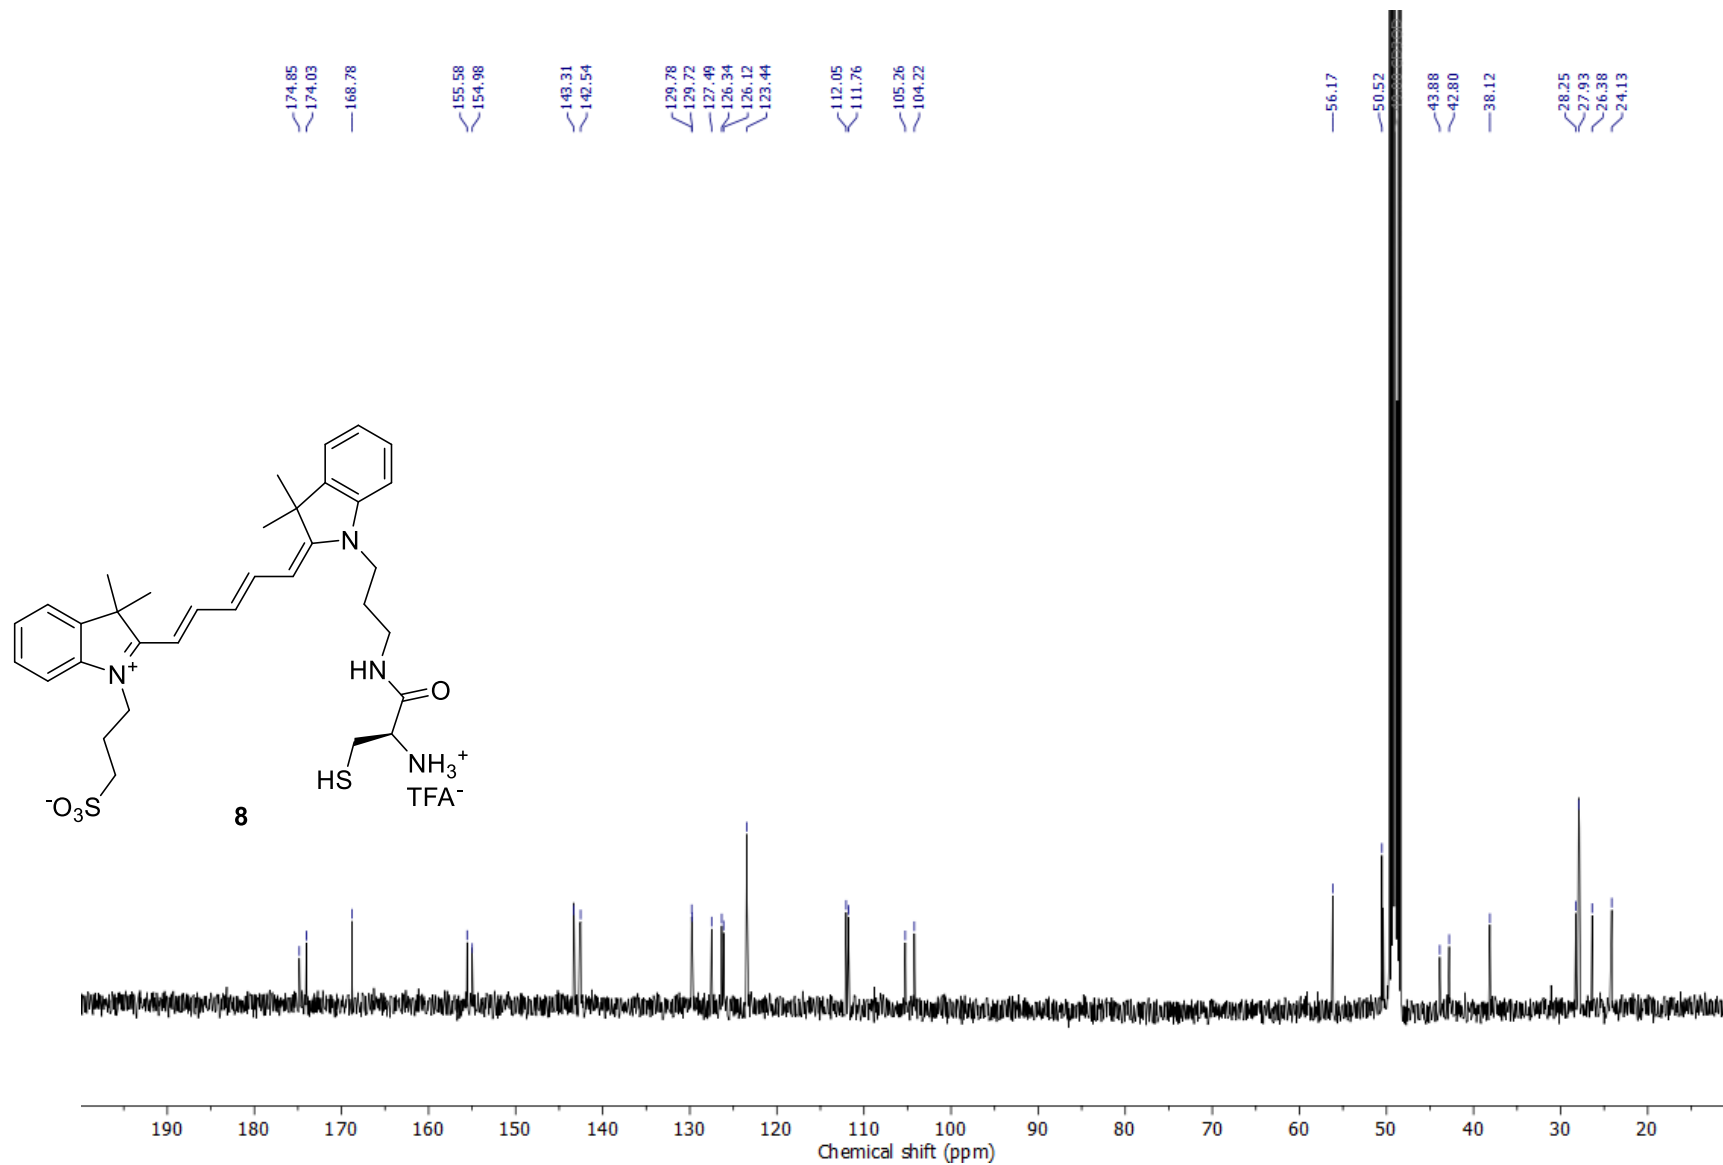

# <sup>1</sup>H NMR (400 MHz, MeOD)

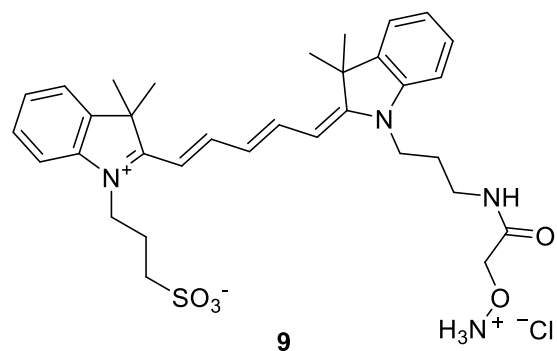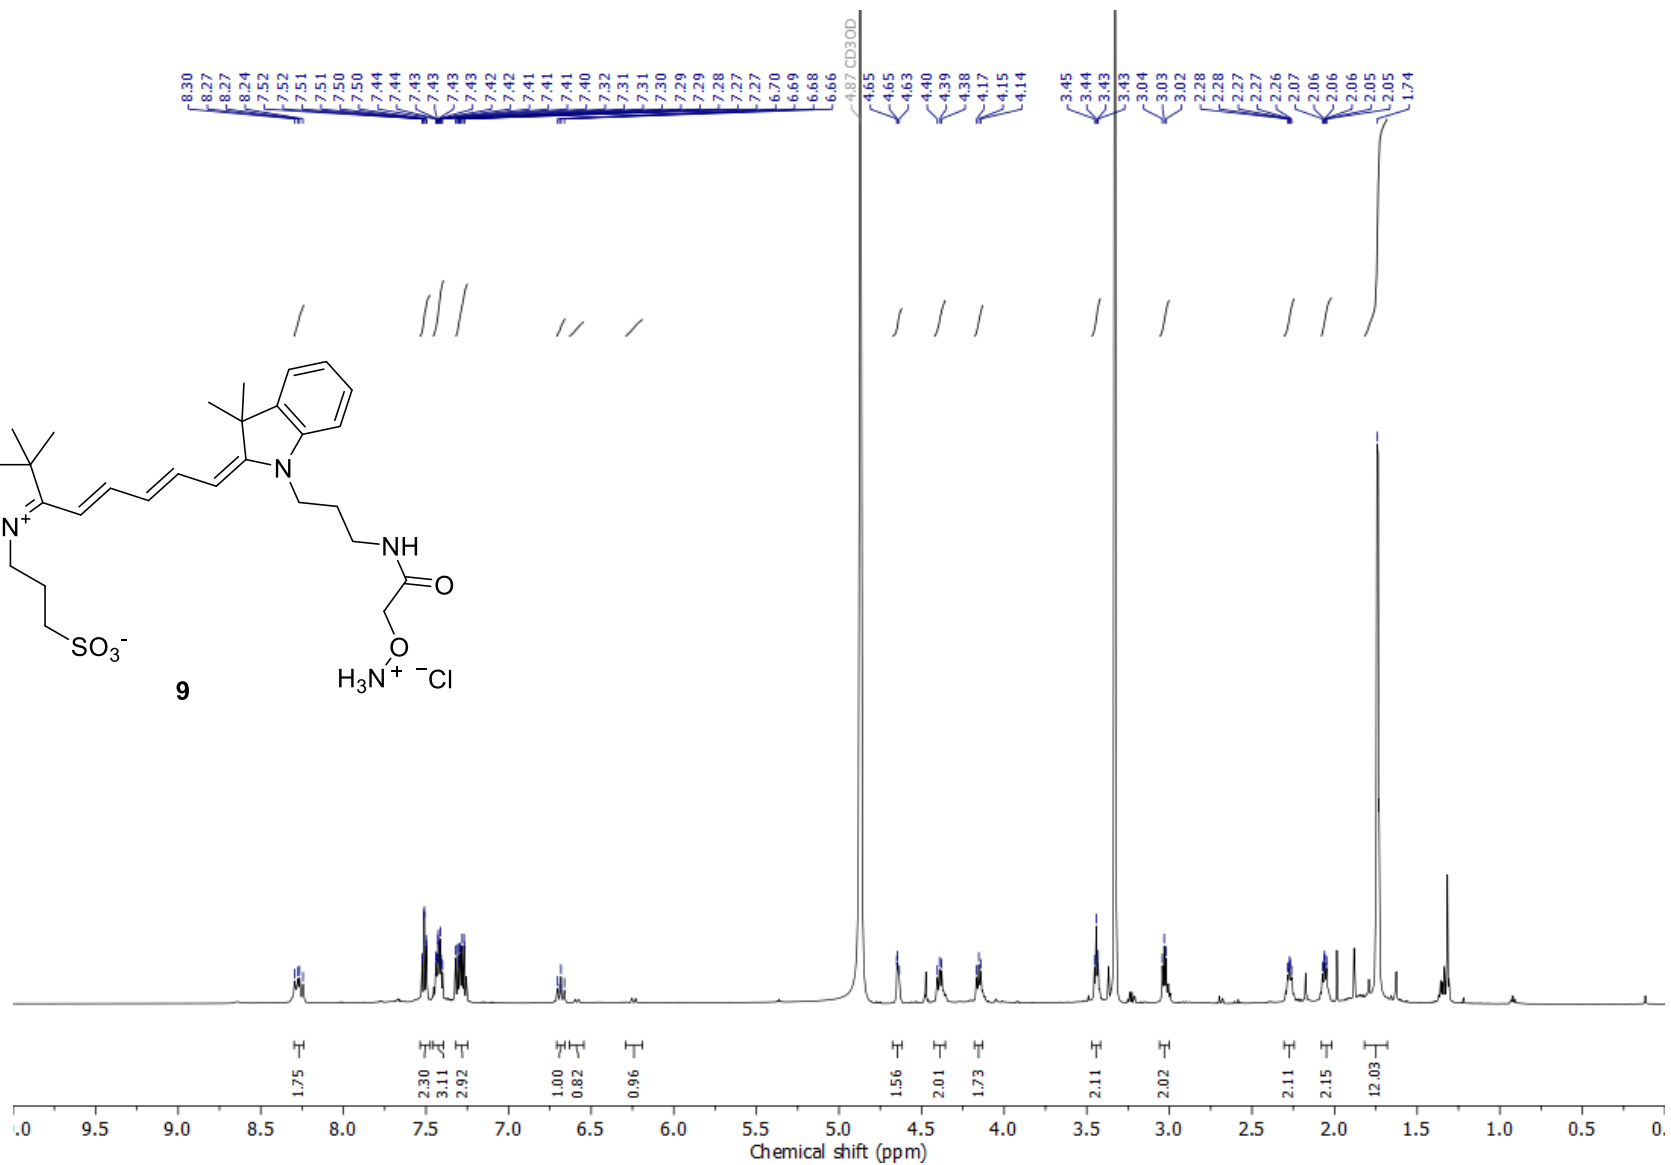

# <sup>1</sup>H NMR (400 MHz, MeOD)

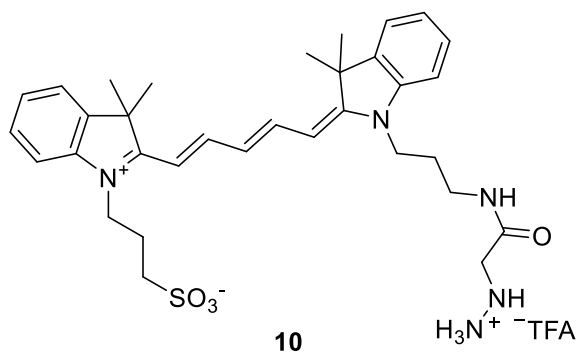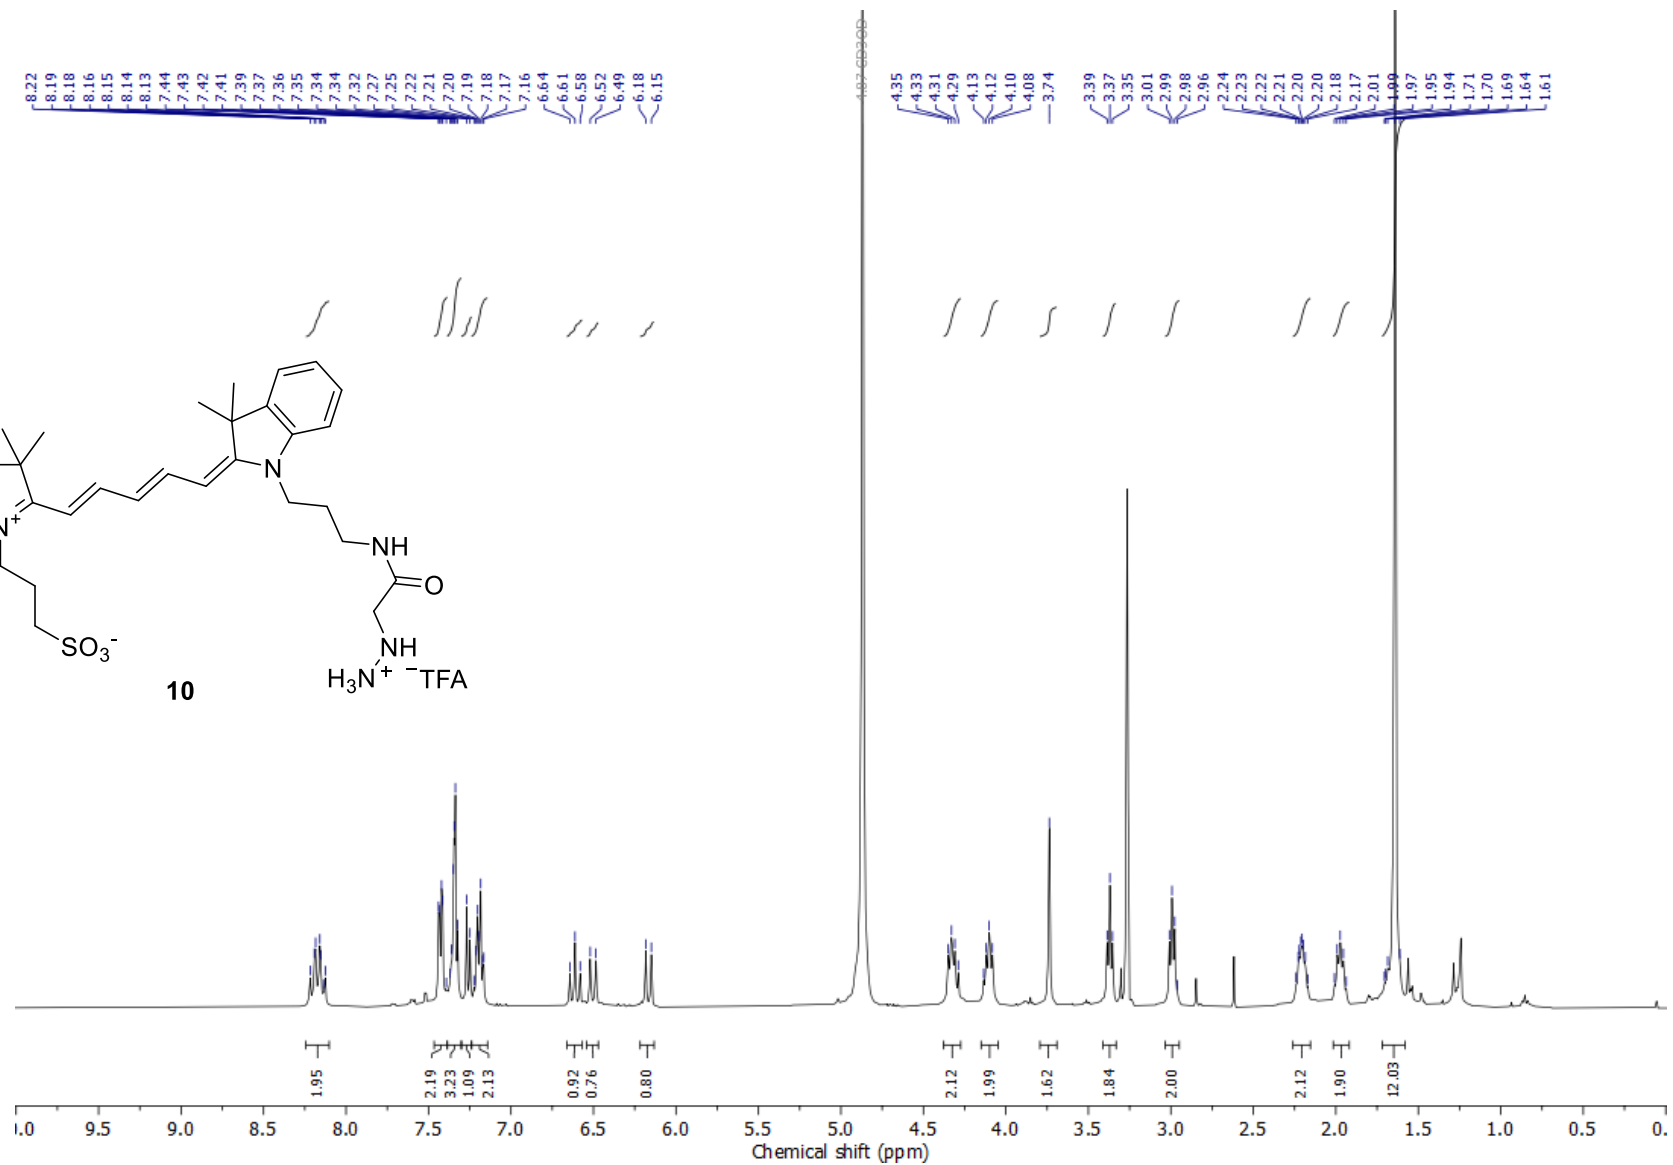

# $^{13}\text{C}$ NMR (100 MHz, MeOD)

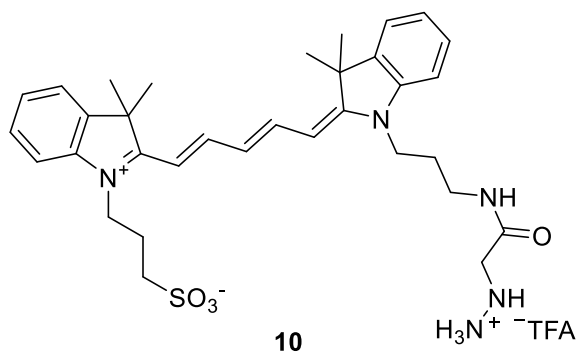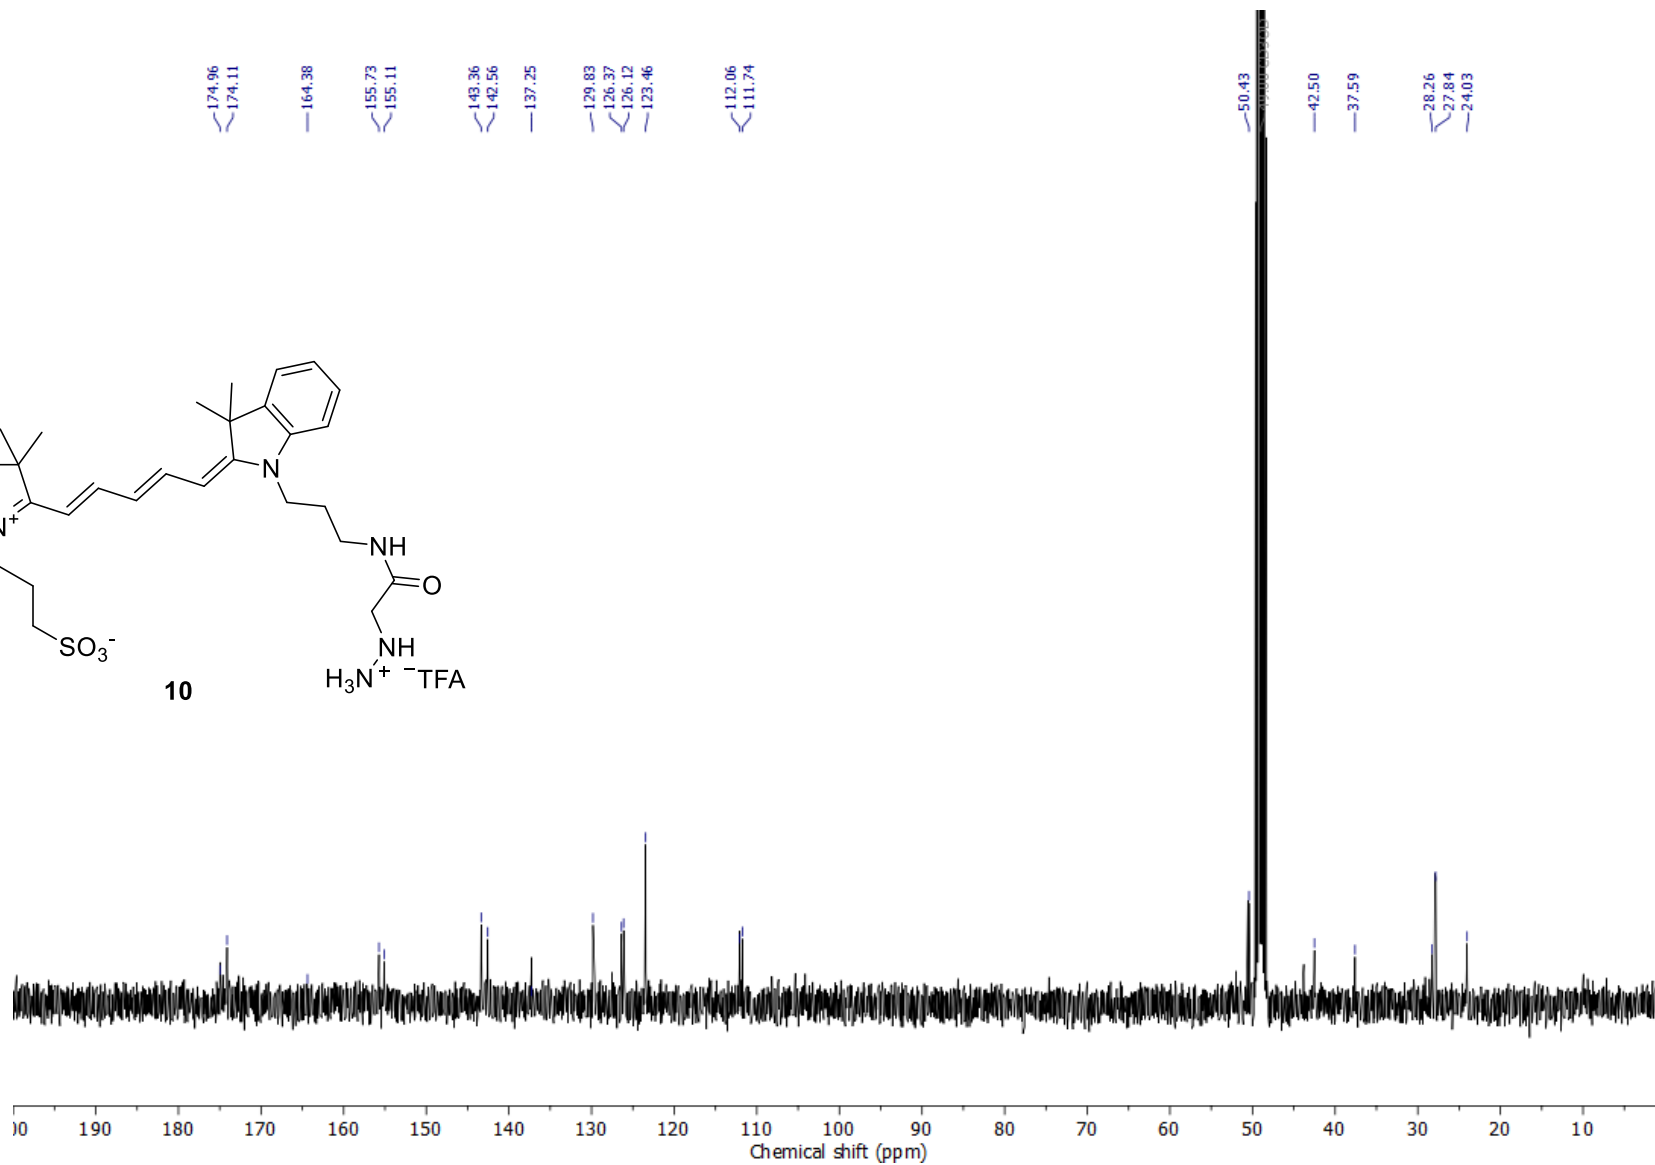

# <sup>1</sup>H NMR (400 MHz, MeOD)

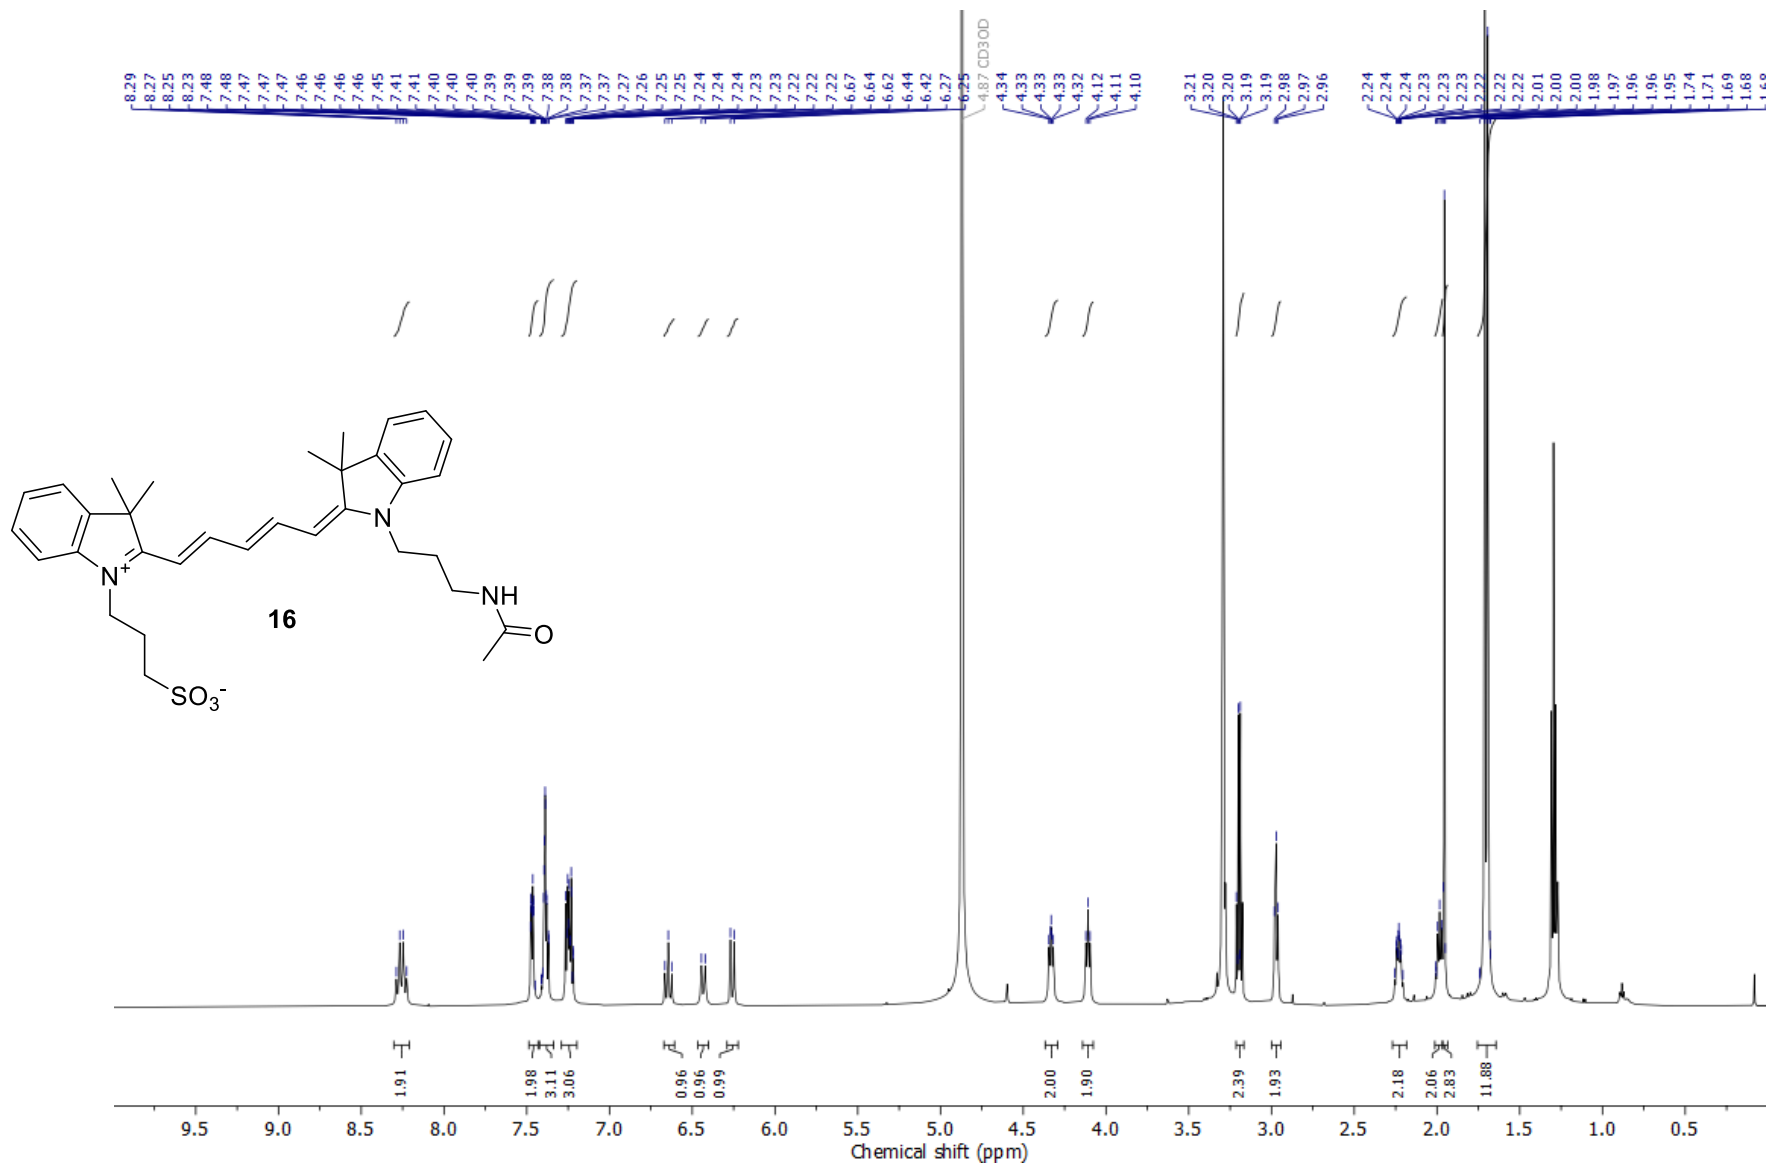

# $^{13}\text{C}$ NMR (100 MHz, MeOD)

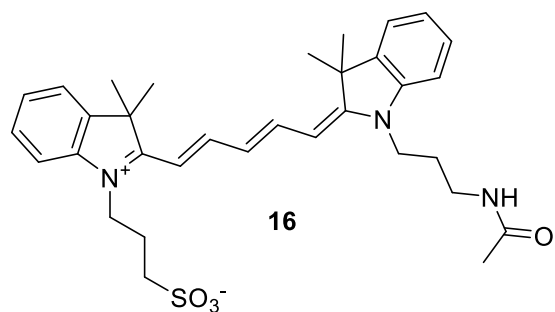

# $^1\text{H}$ NMR (600 MHz, MeOD)

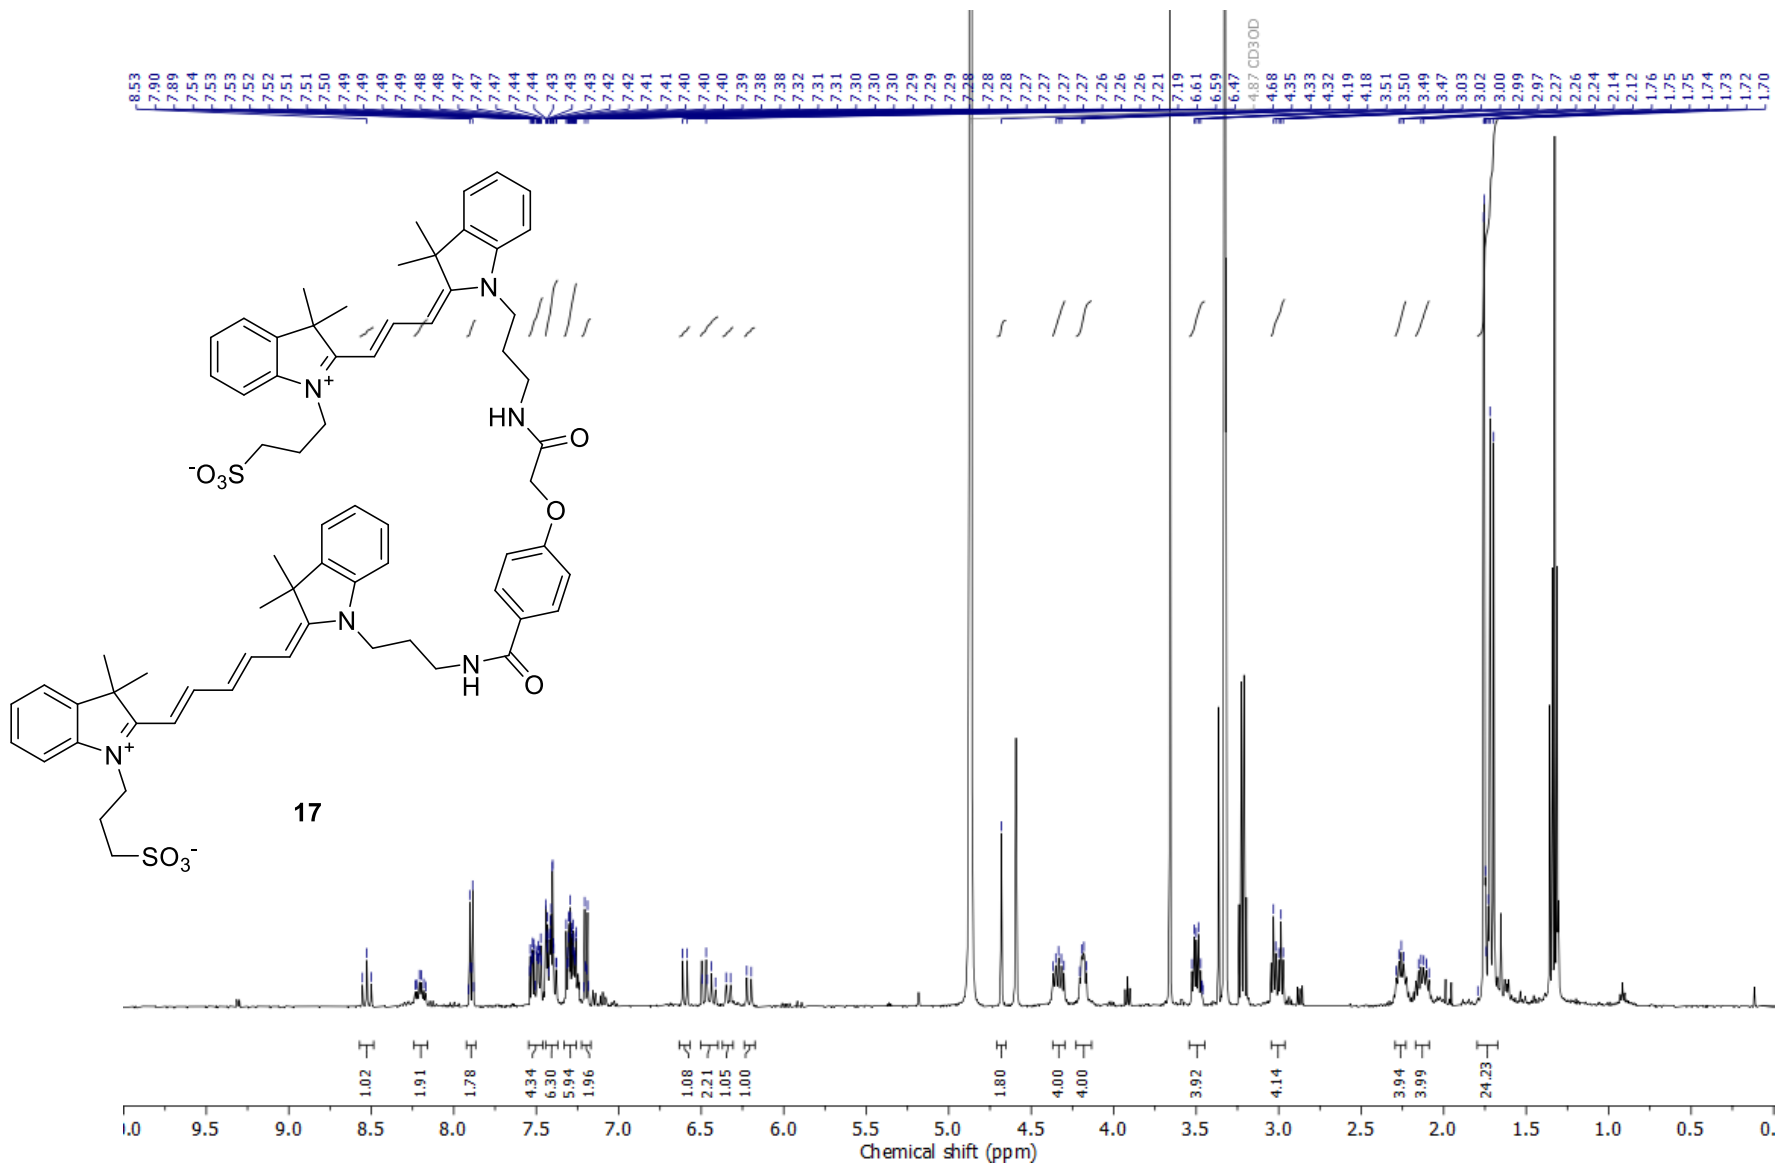

# $^{13}\text{C}$ NMR(600 MHz, MeOD)

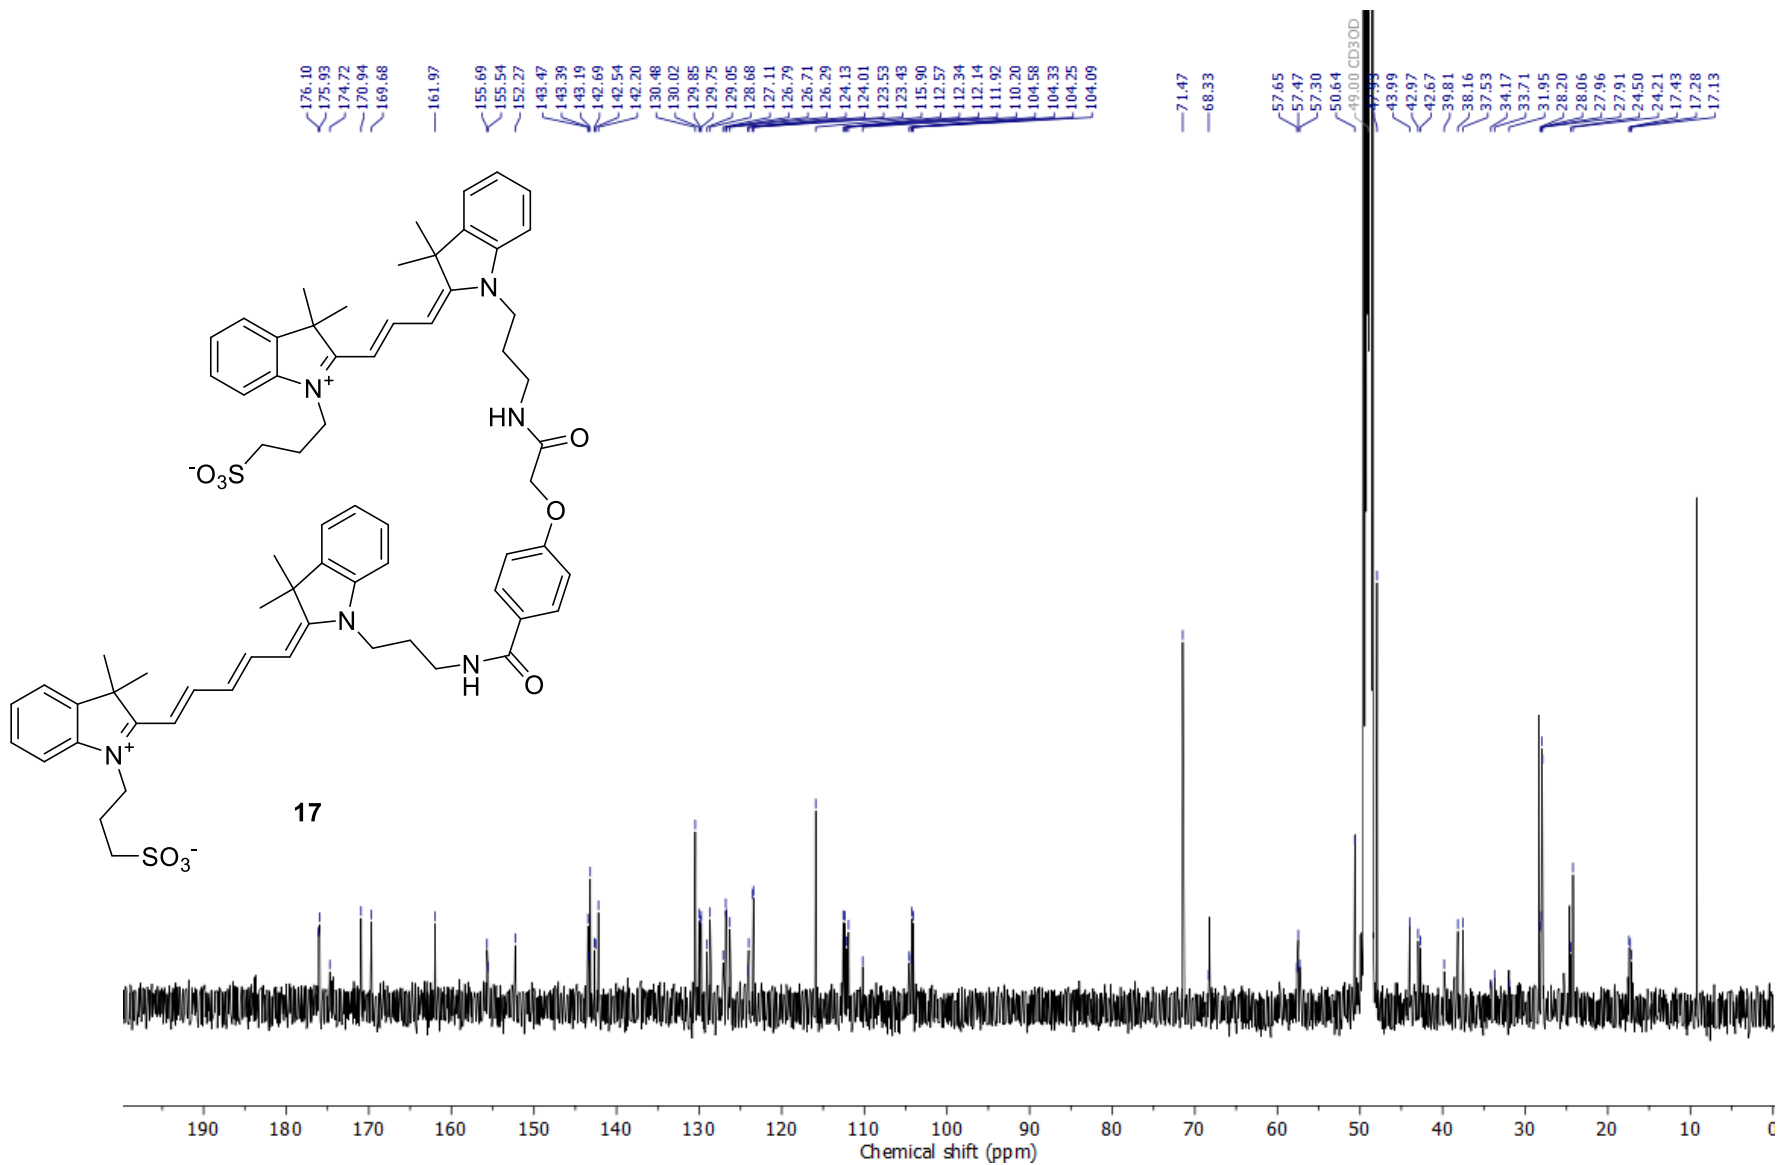

# $^1\text{H}$ NMR (400 MHz, MeOD)

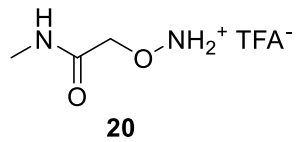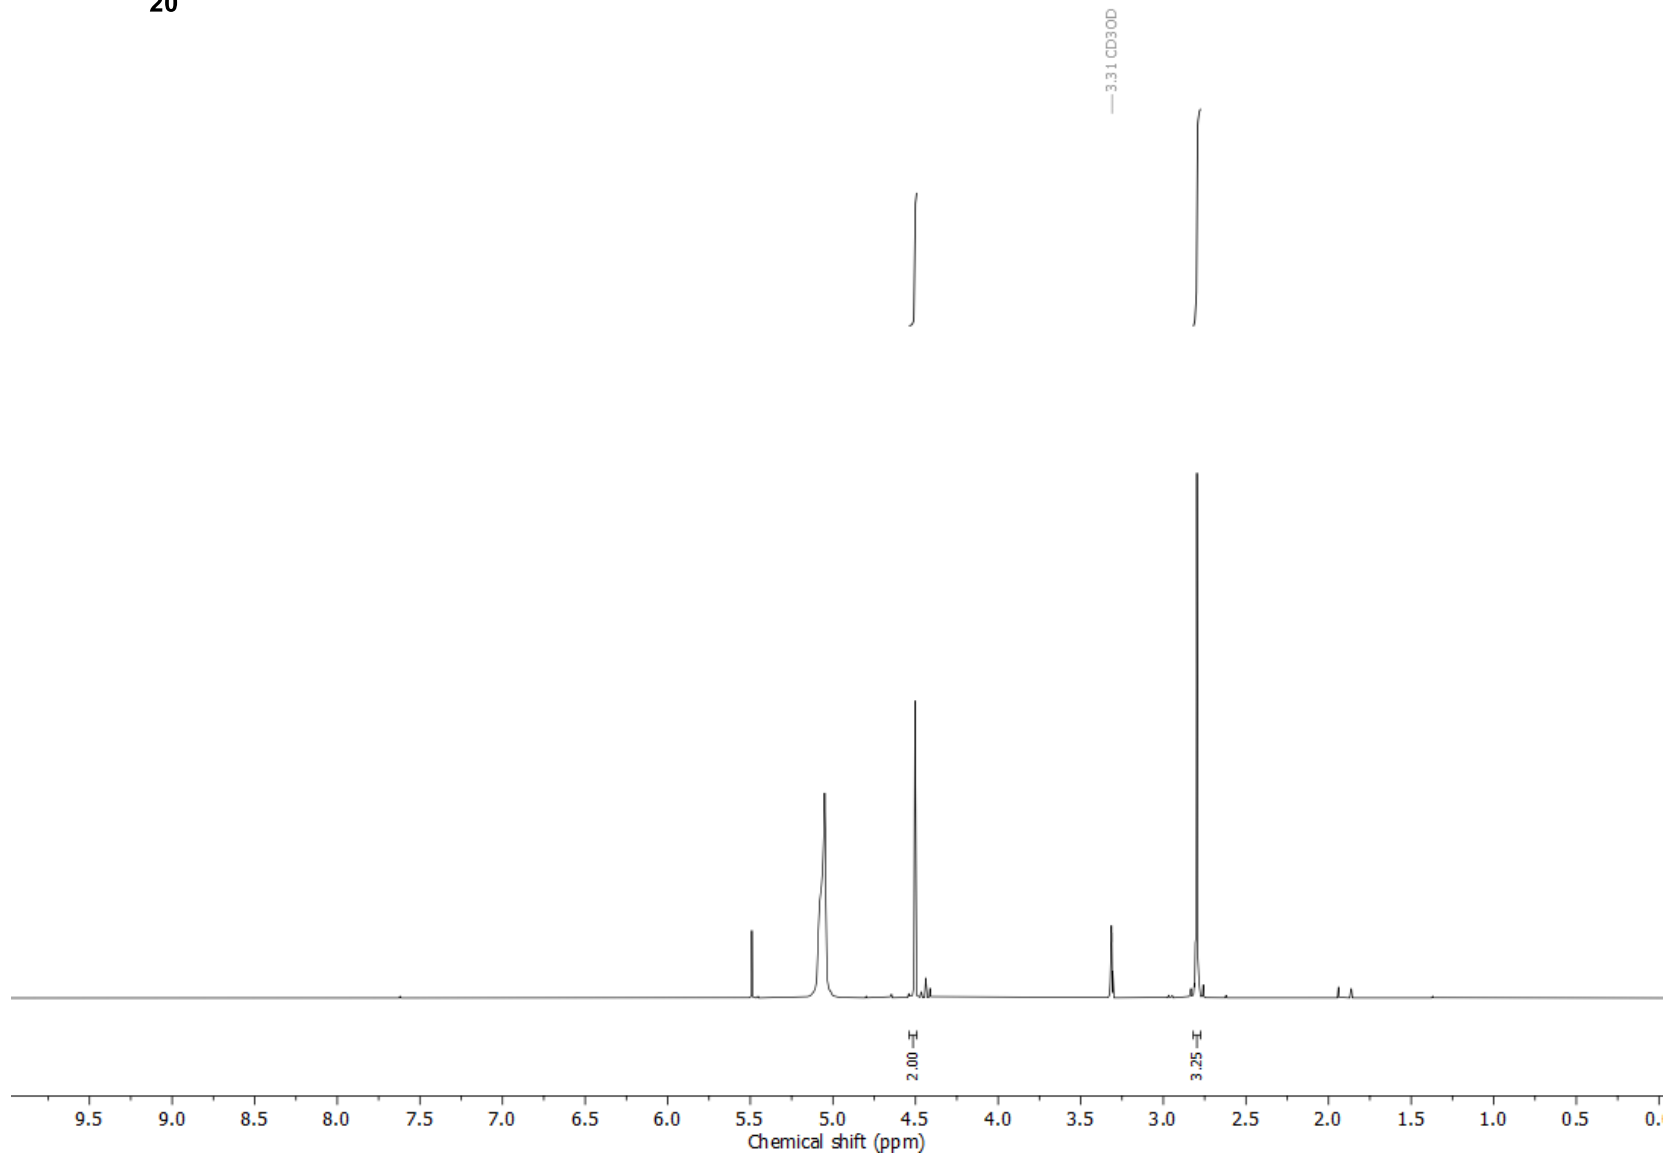

# $^{13}\text{C}$ NMR (100 MHz, MeOD)

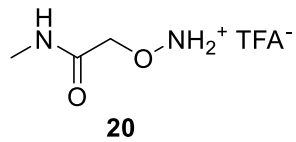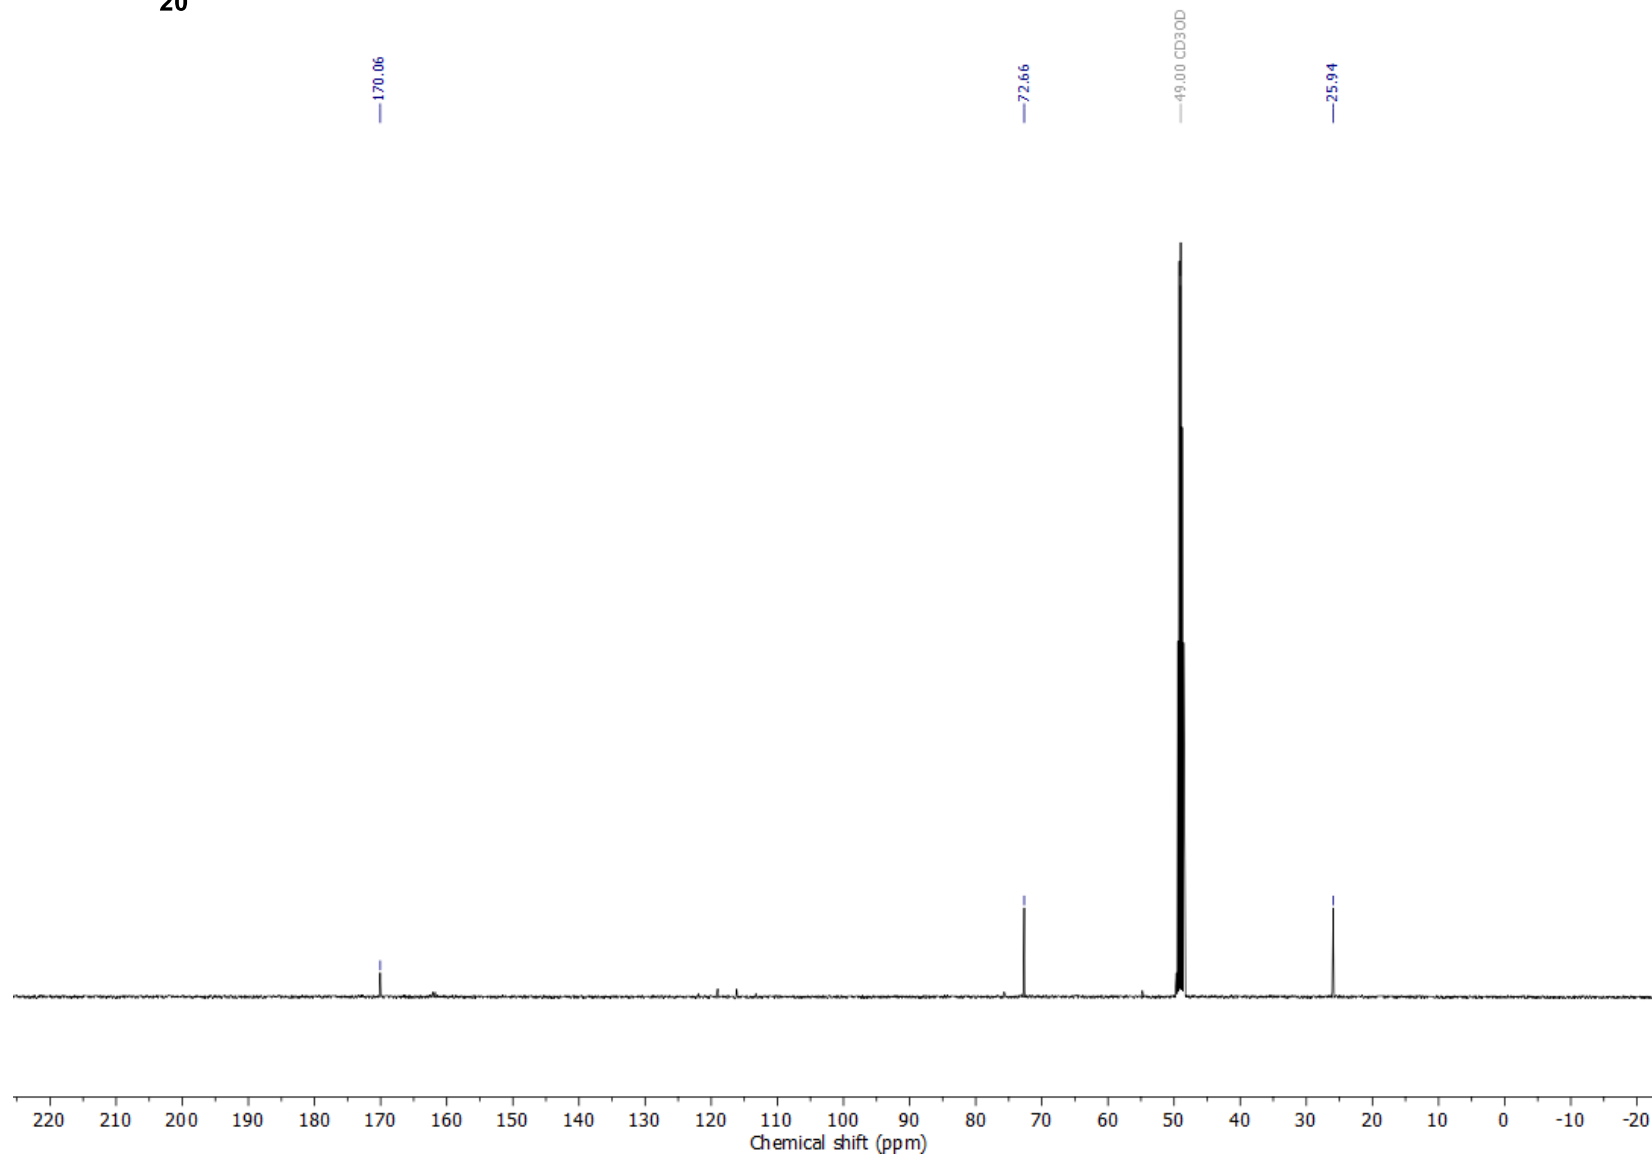

# $^1\text{H}$ NMR (400 MHz, MeOD)

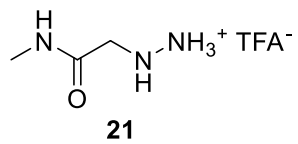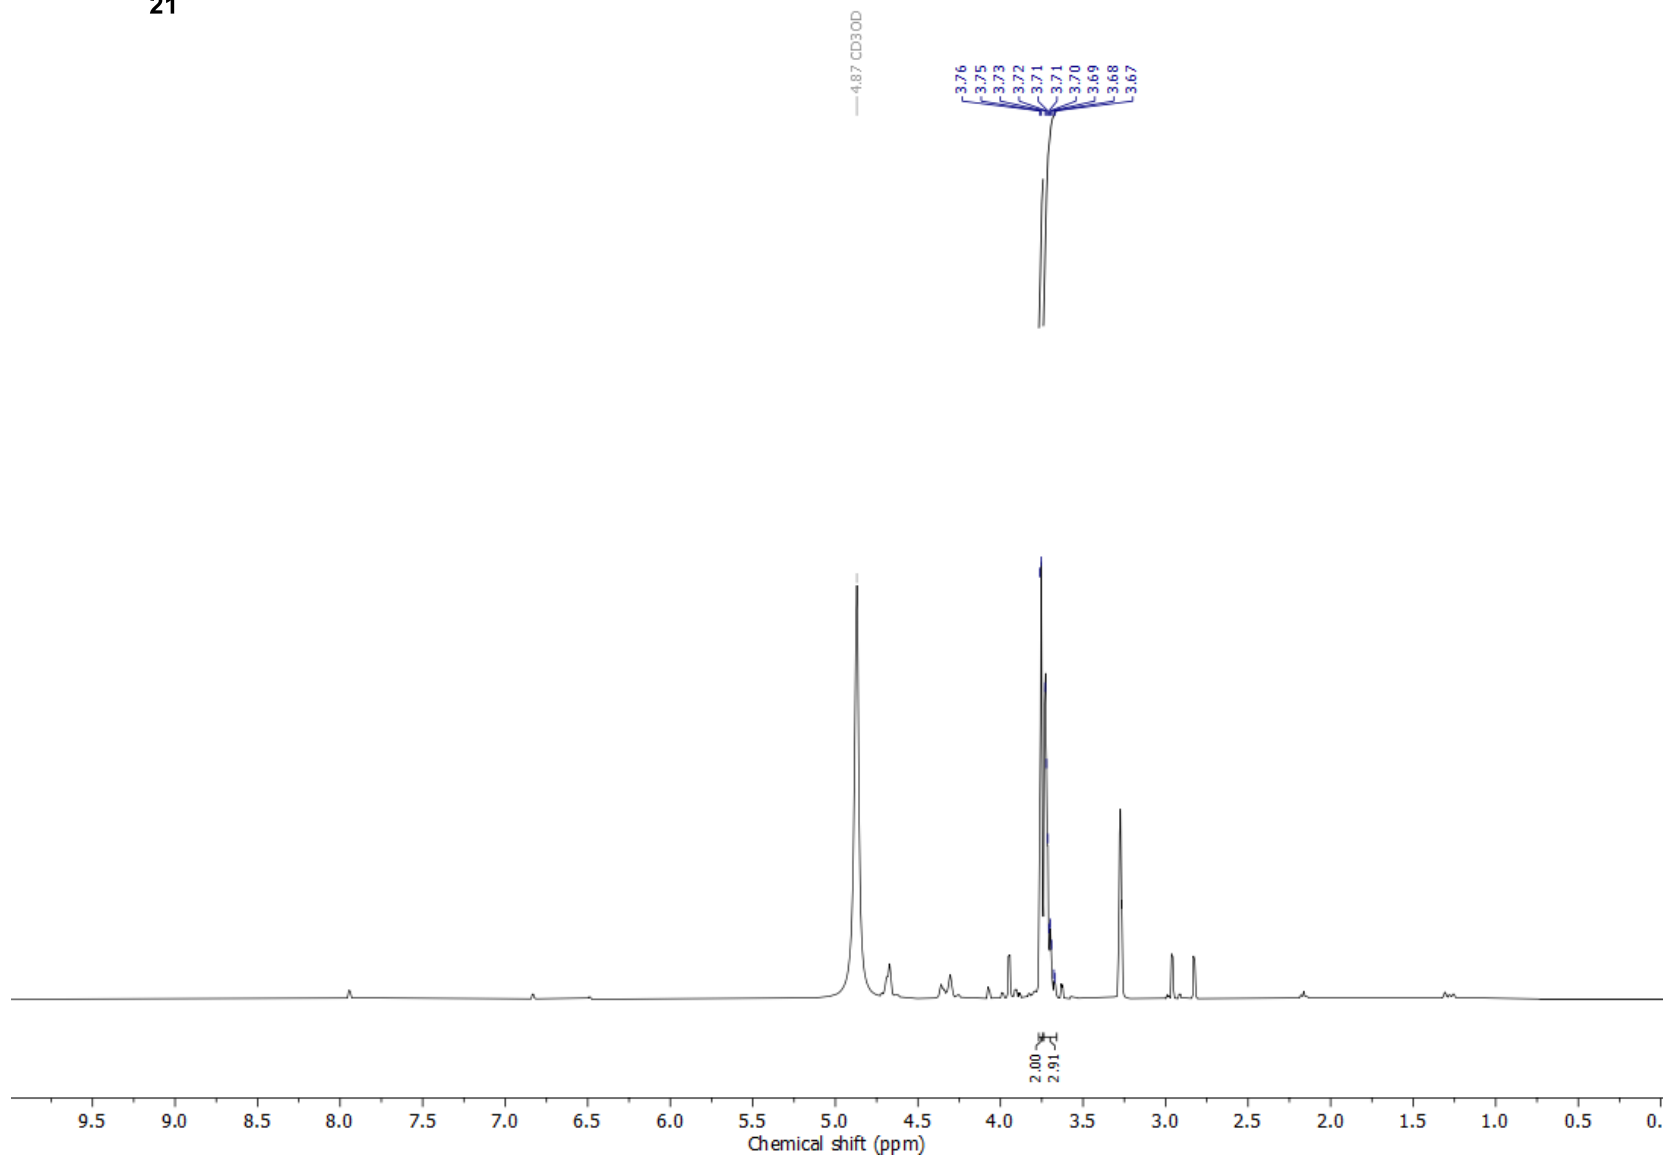

# $^{13}\text{C}$ NMR (100 MHz, MeOD)

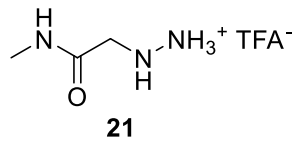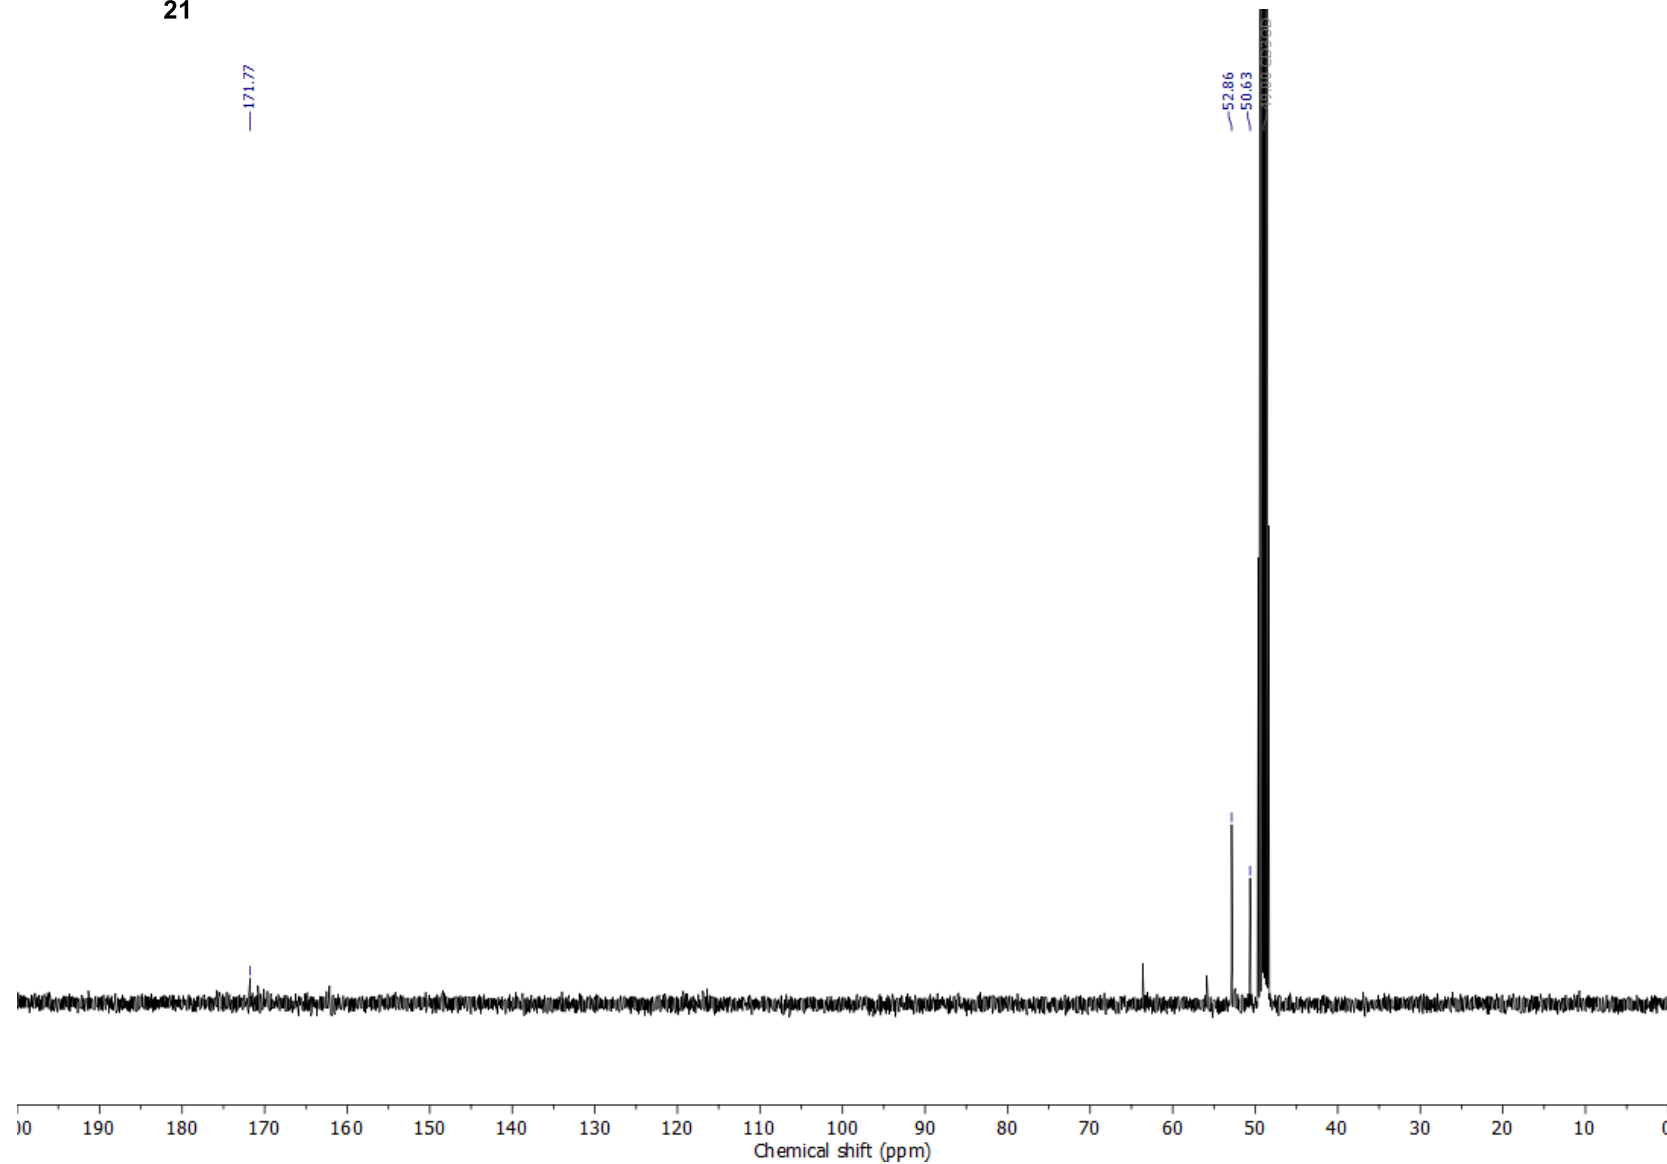

# $^1\text{H}$ NMR (400 MHz, 100 mM deuterated PBS + 10% DMSO- $d_6$ )

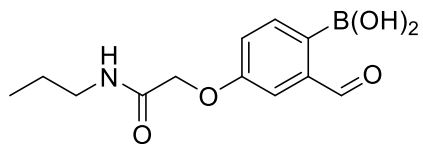

22

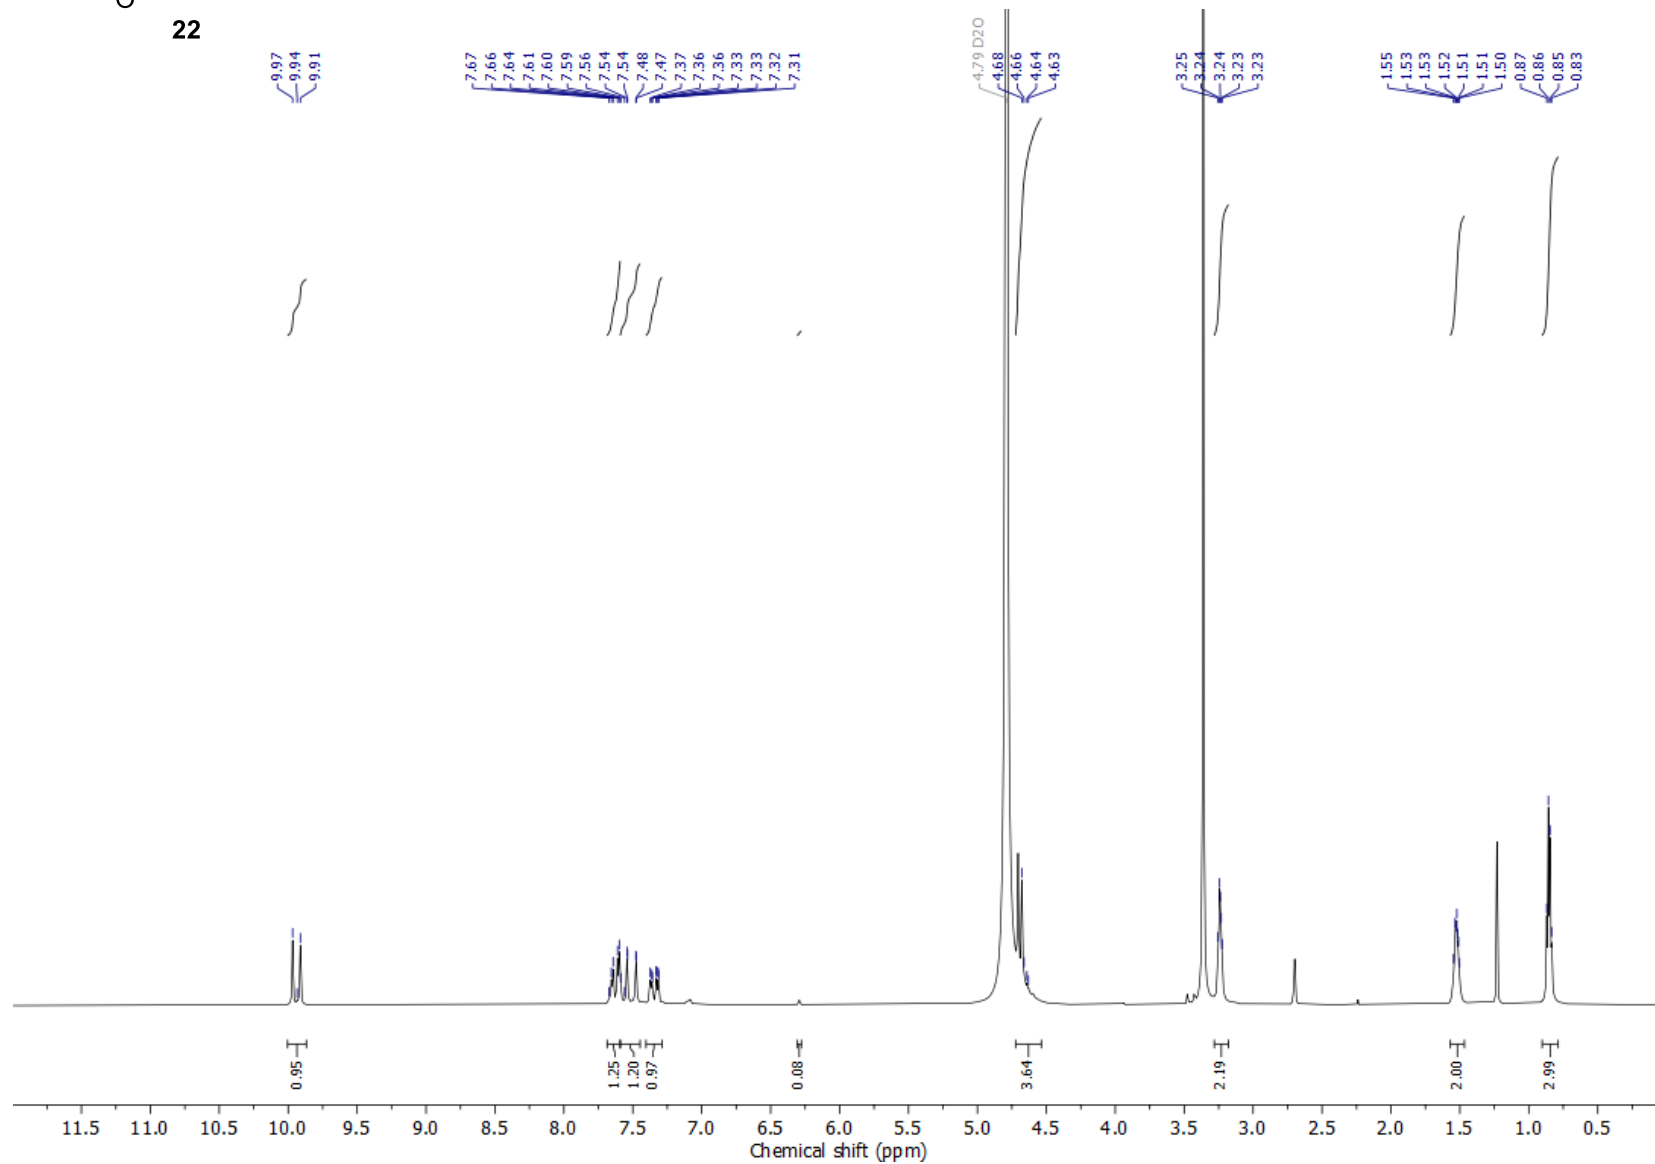

# $^{13}\text{C}$ NMR (100 MHz, MeOD)

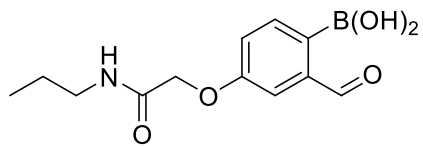

22

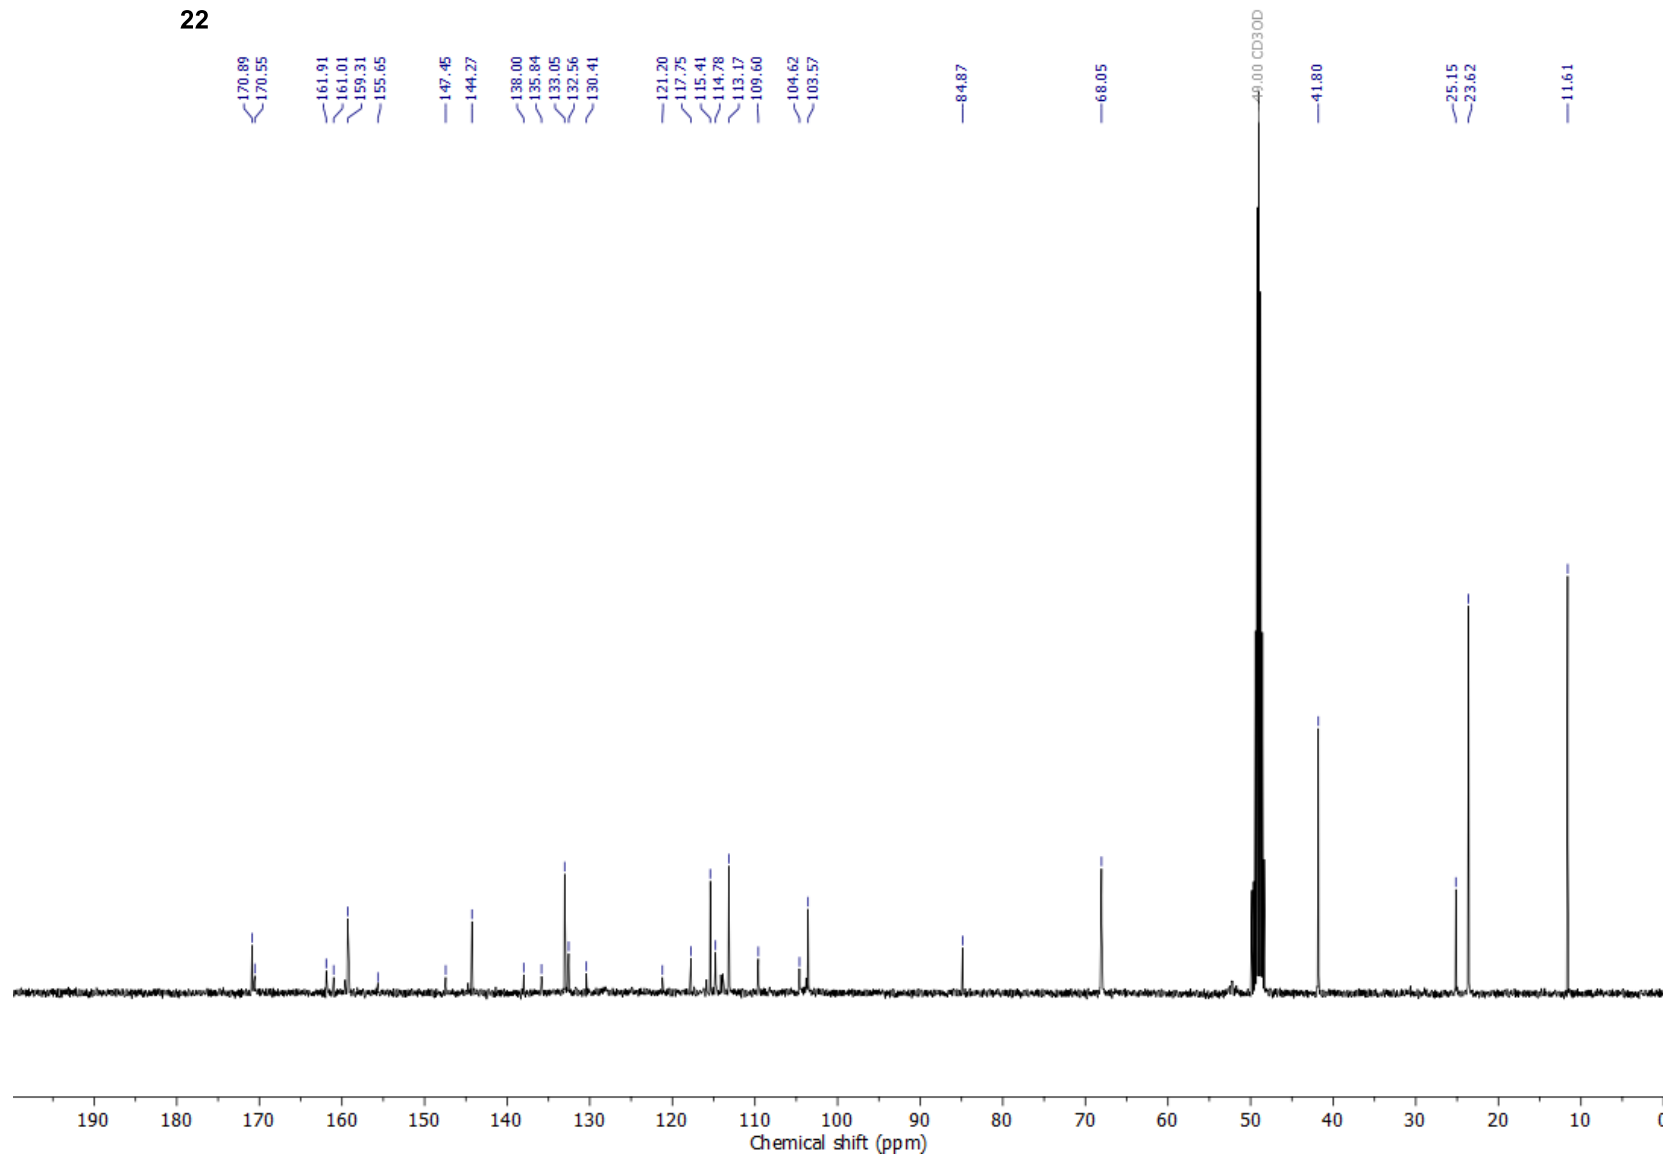

# $^1\text{H}$ NMR (400 MHz, MeOD)

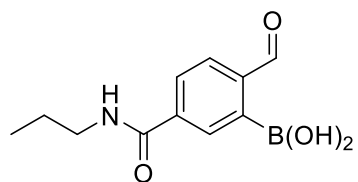

**24**

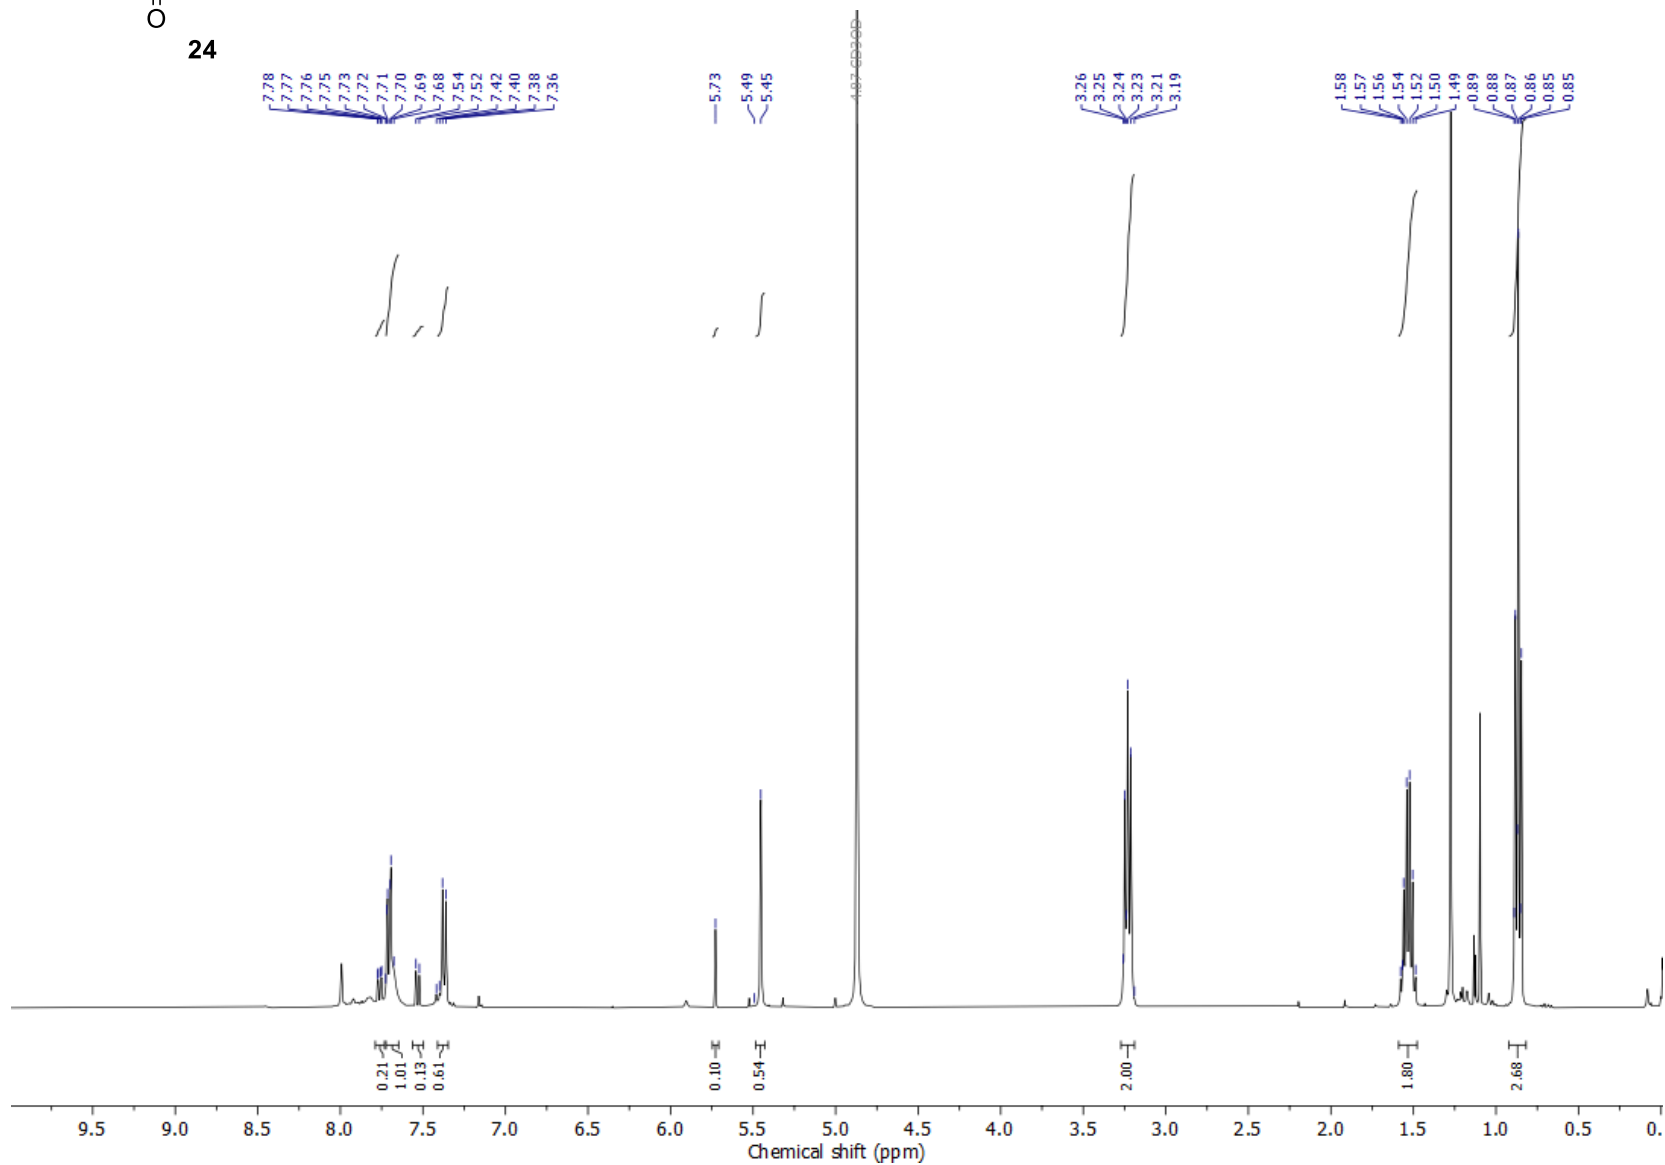

# $^{13}\text{C}$ NMR (100 MHz, MeOD)

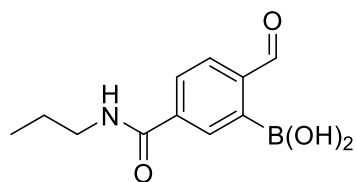

**24**

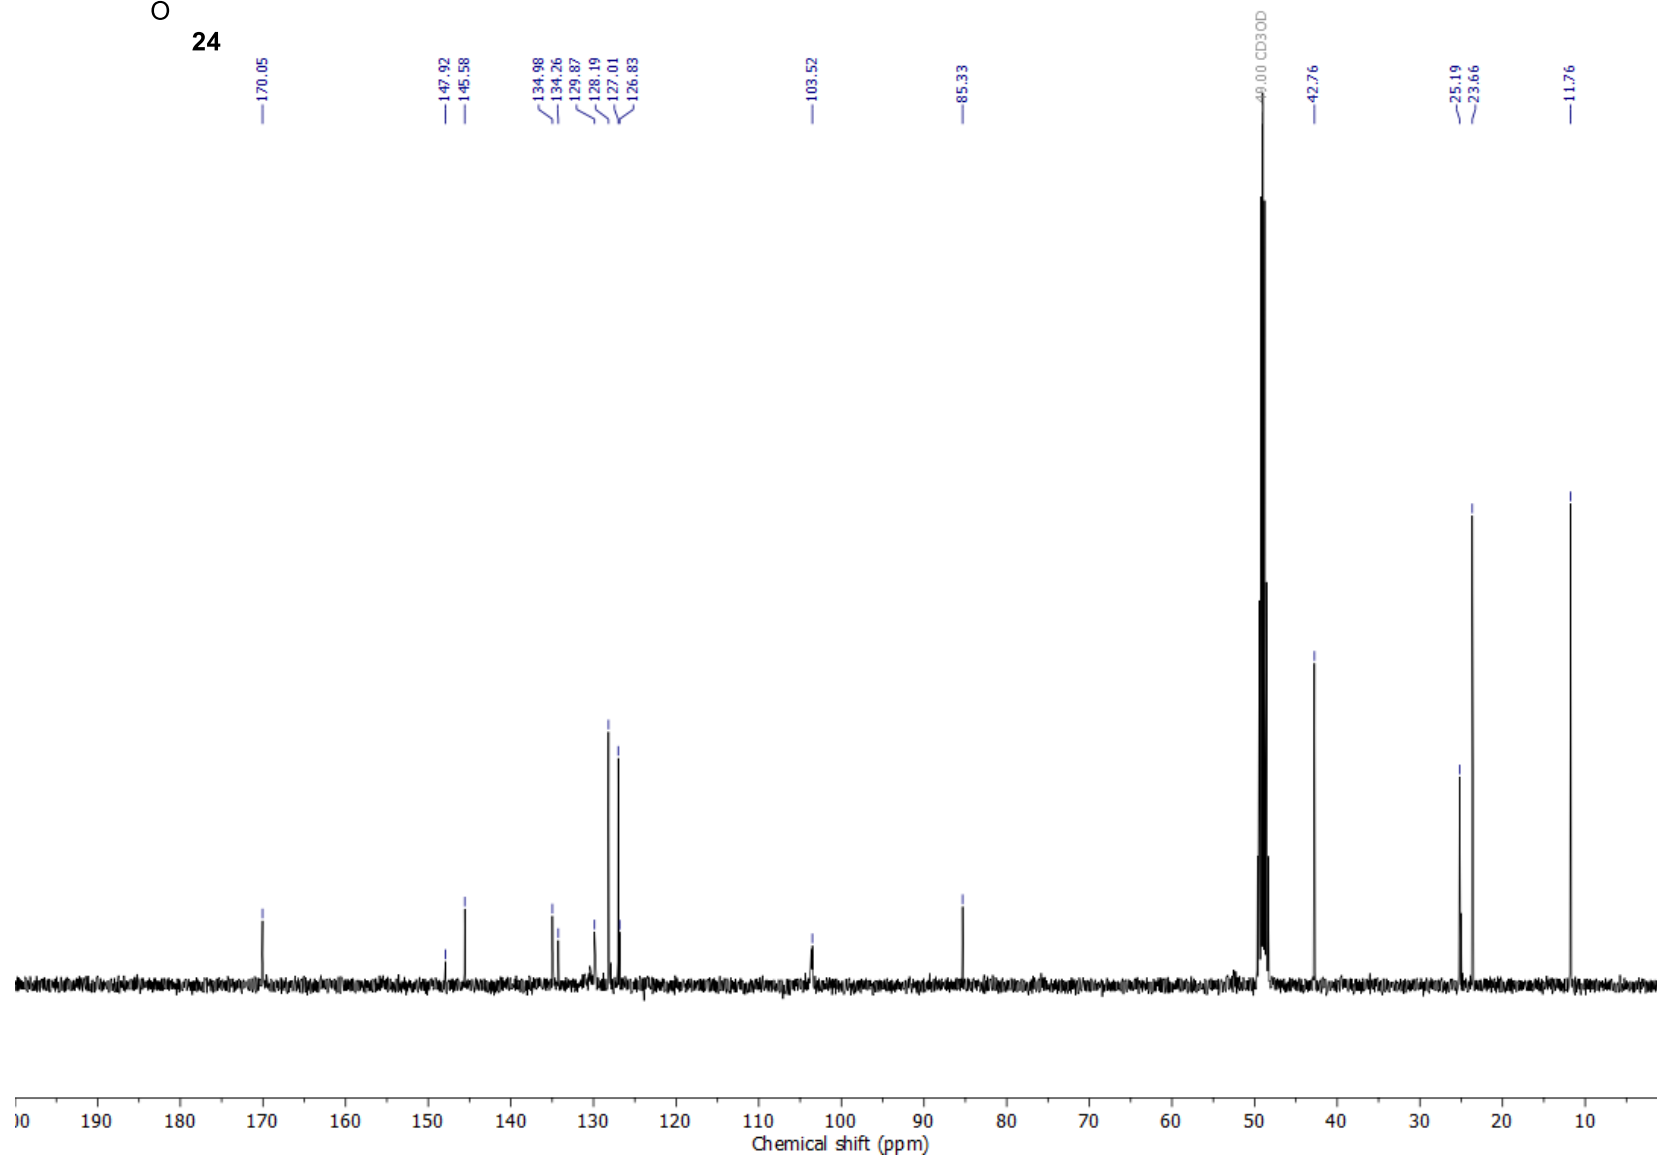

# $^1\text{H}$ NMR (400 MHz, 100 mM deuterated PBS + 10% DMSO- $d_6$ )

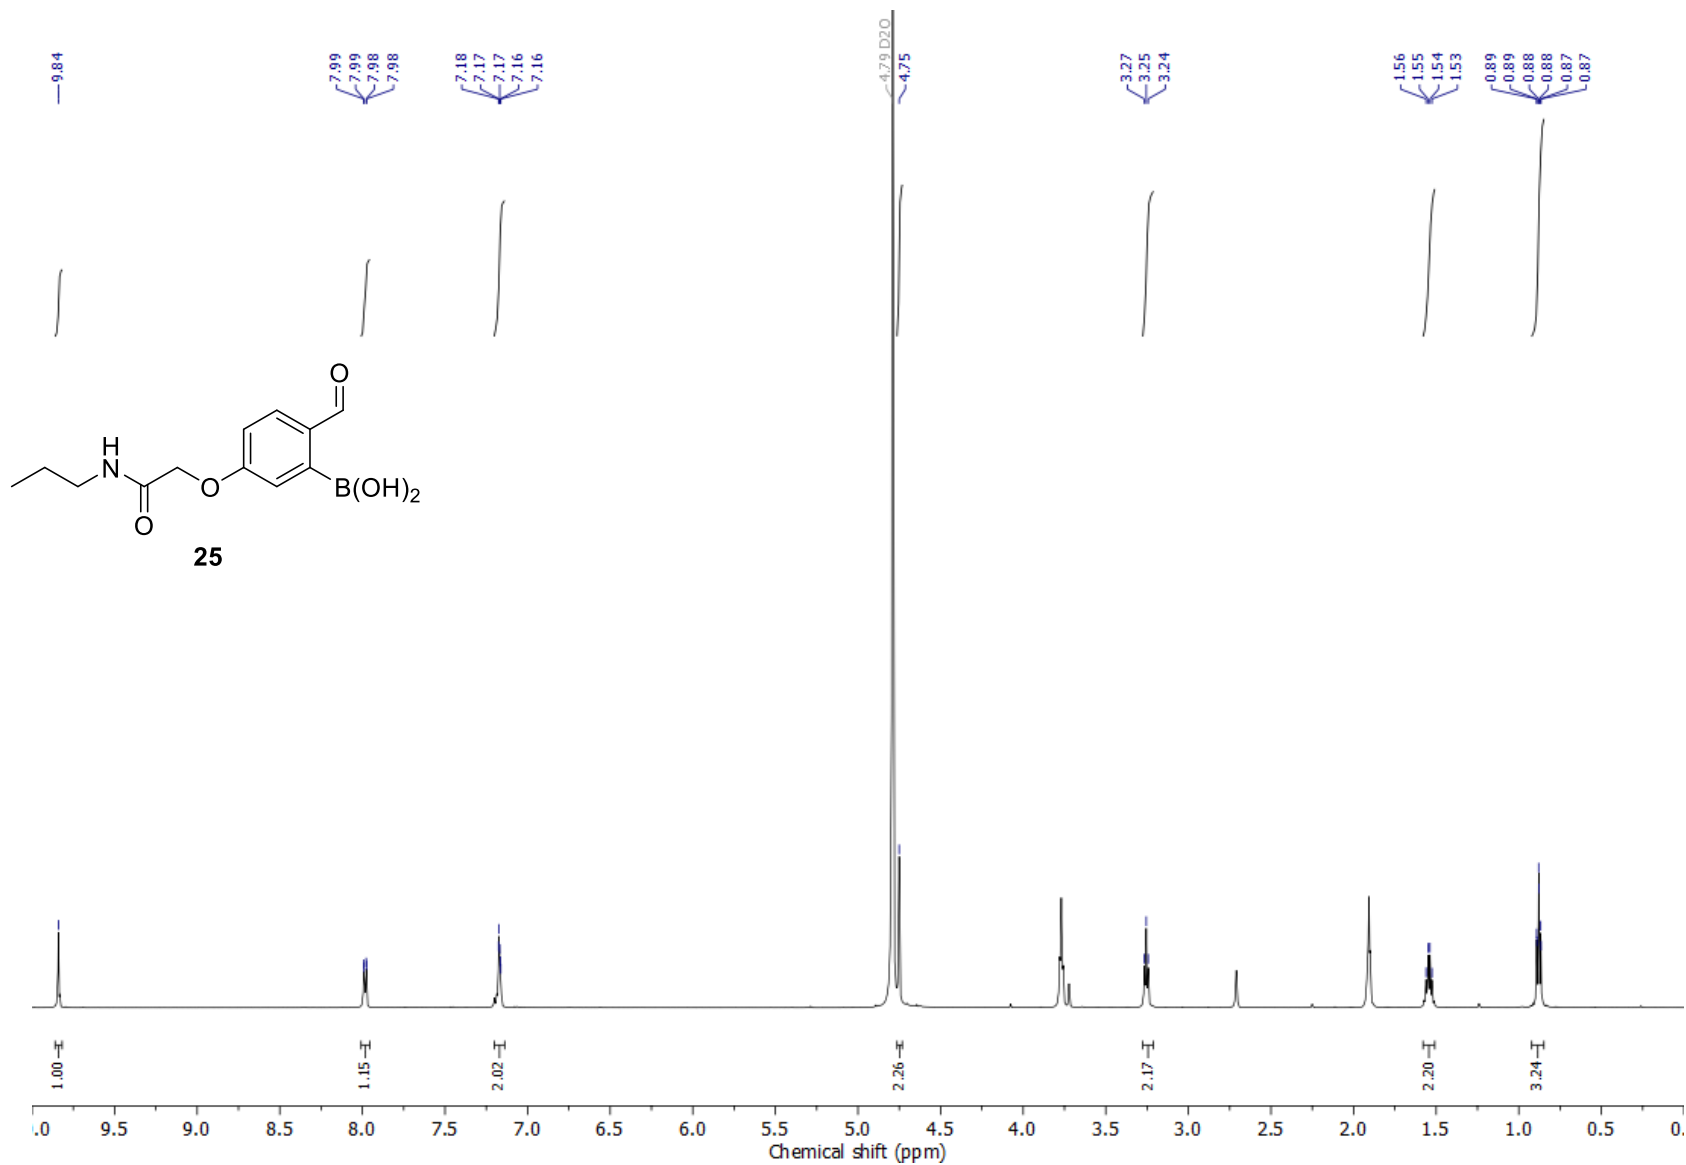

# $^{13}\text{C}$ NMR (100 MHz, 100 mM deuterated PBS + 10% DMSO- $d_6$ )

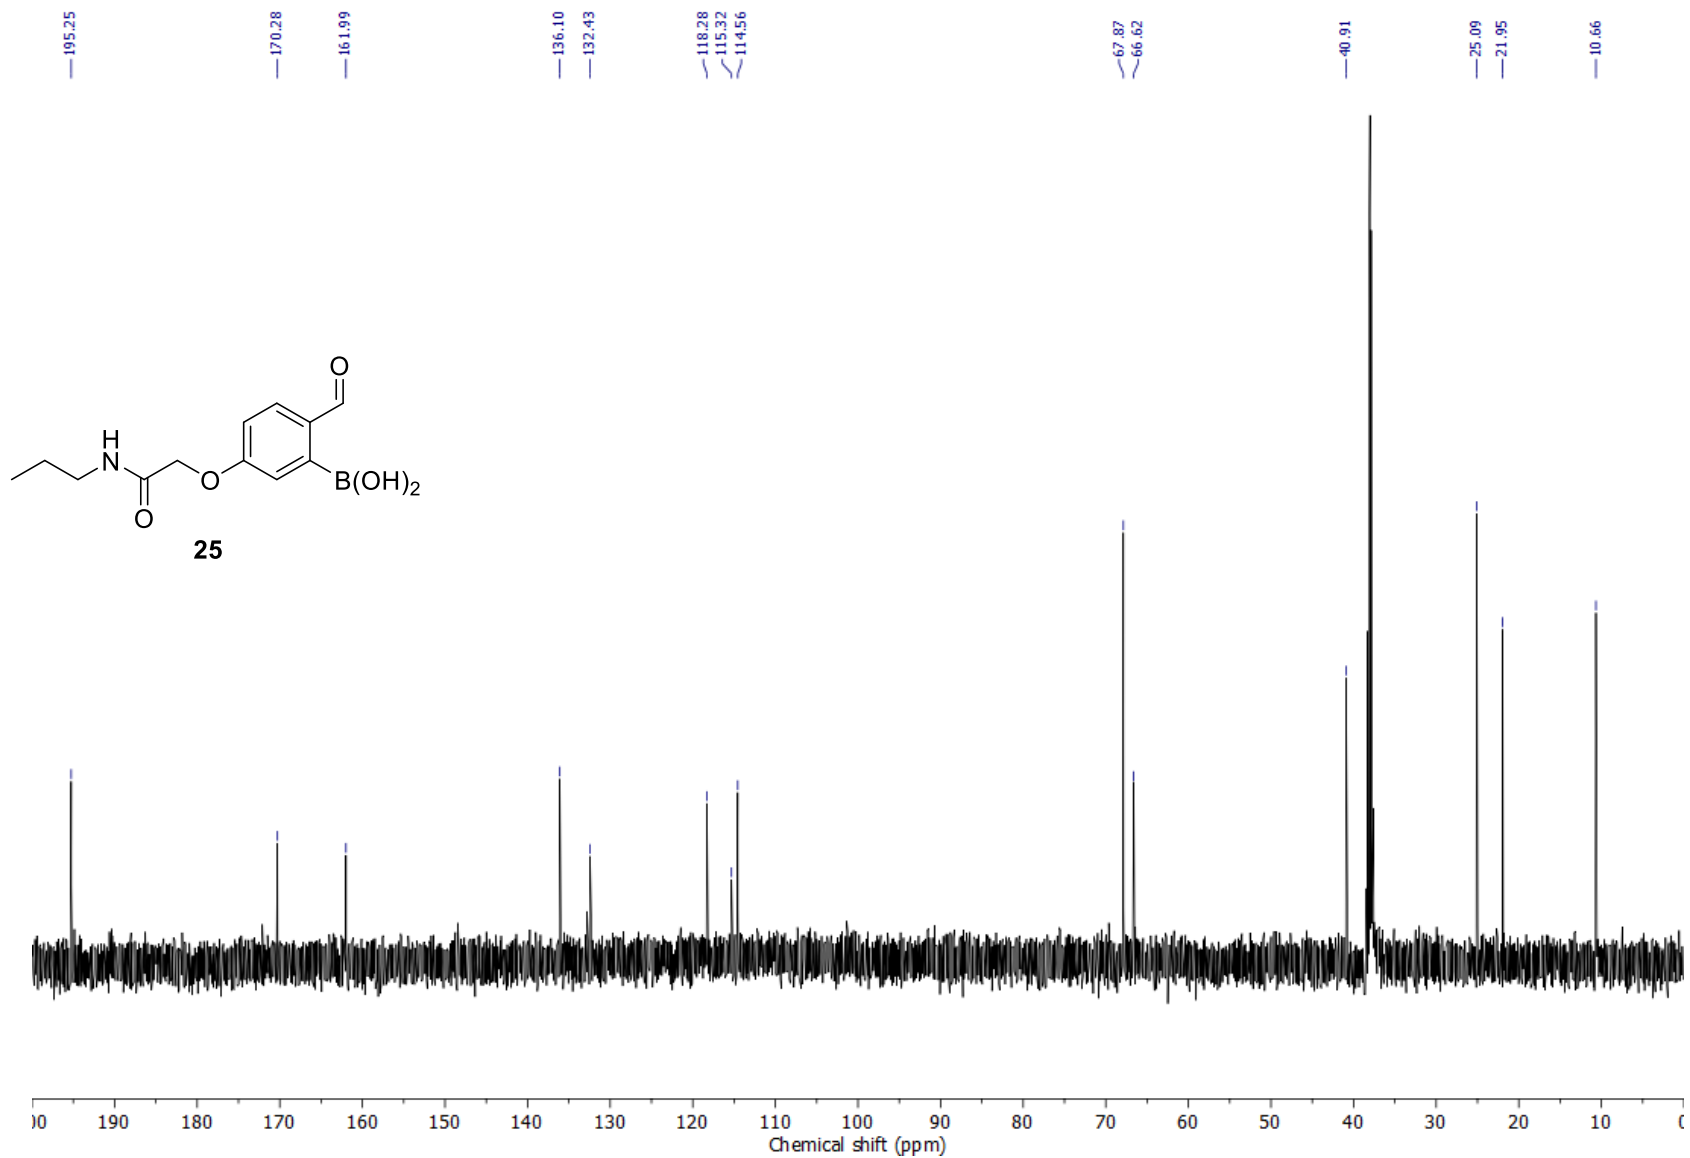

# $^1\text{H}$ NMR (400 MHz, MeOD)

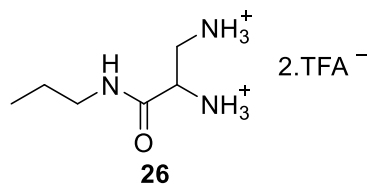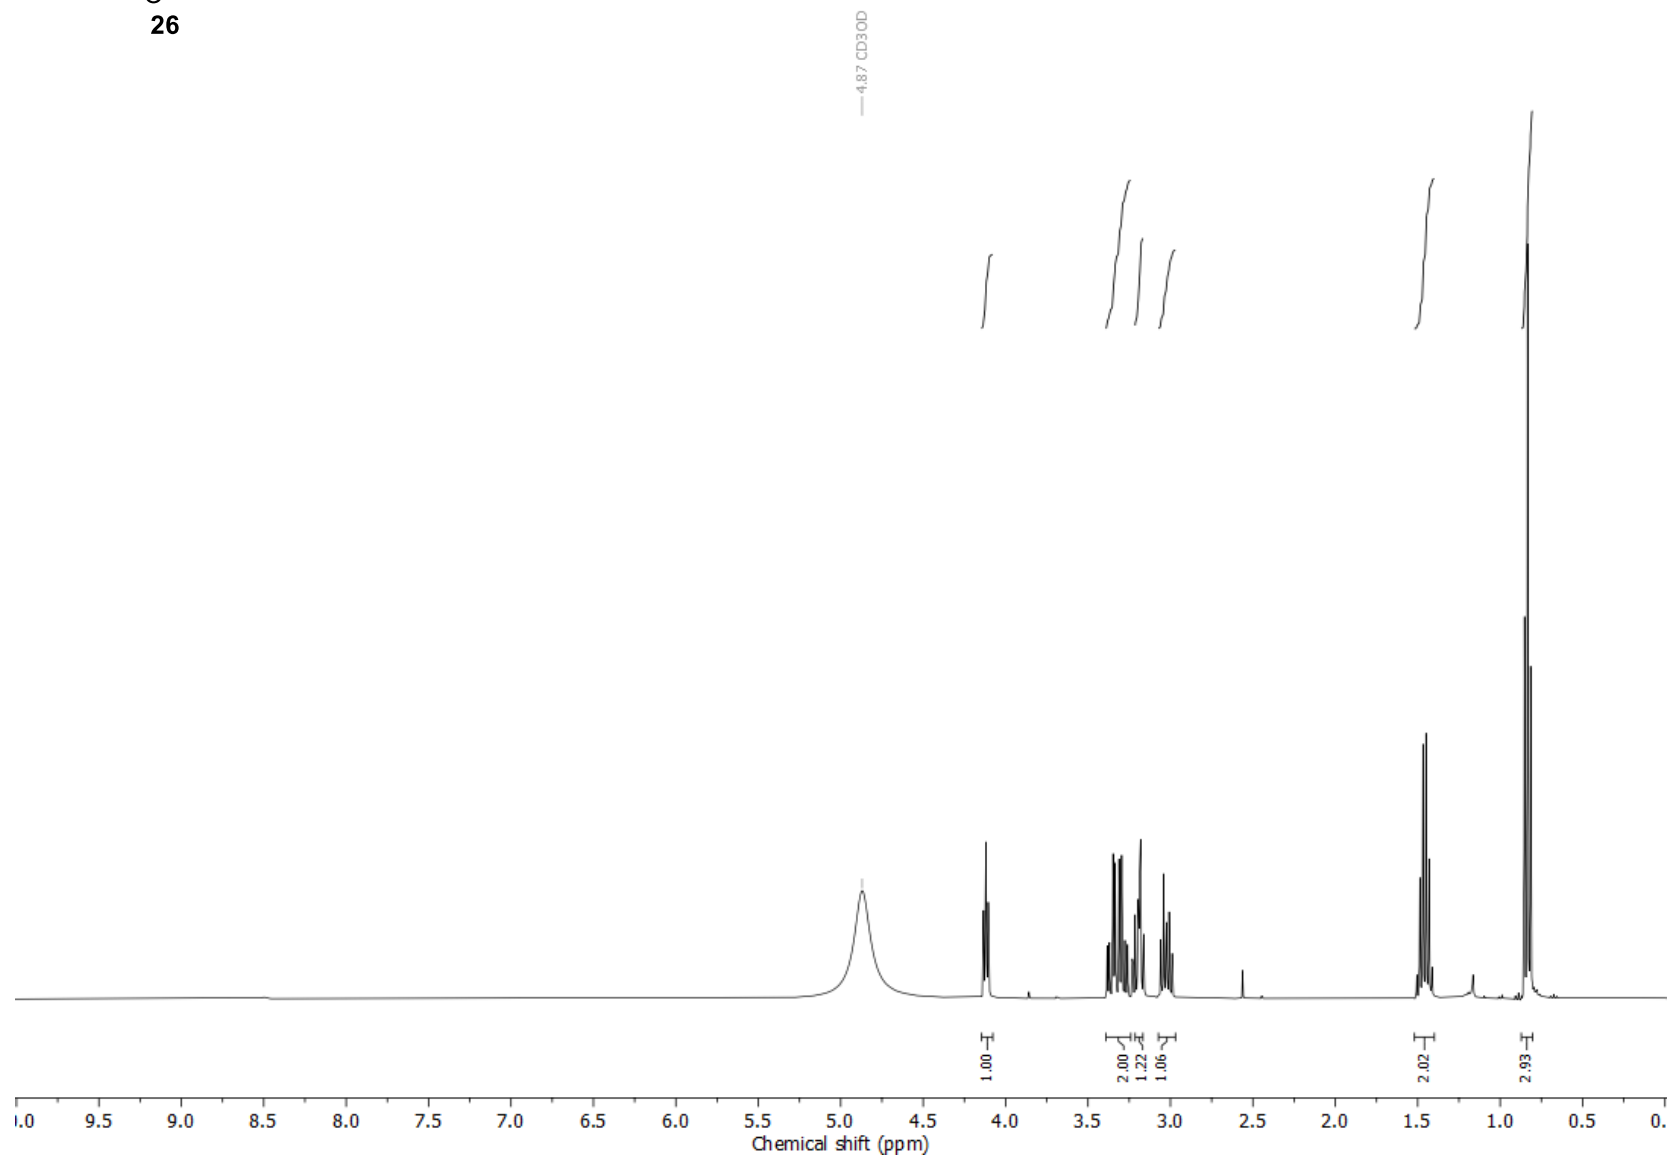

# $^{13}\text{C}$ NMR (100 MHz, MeOD)

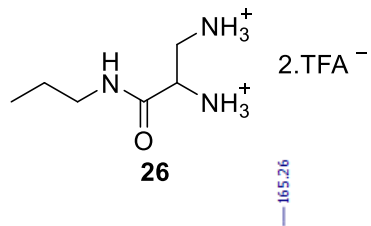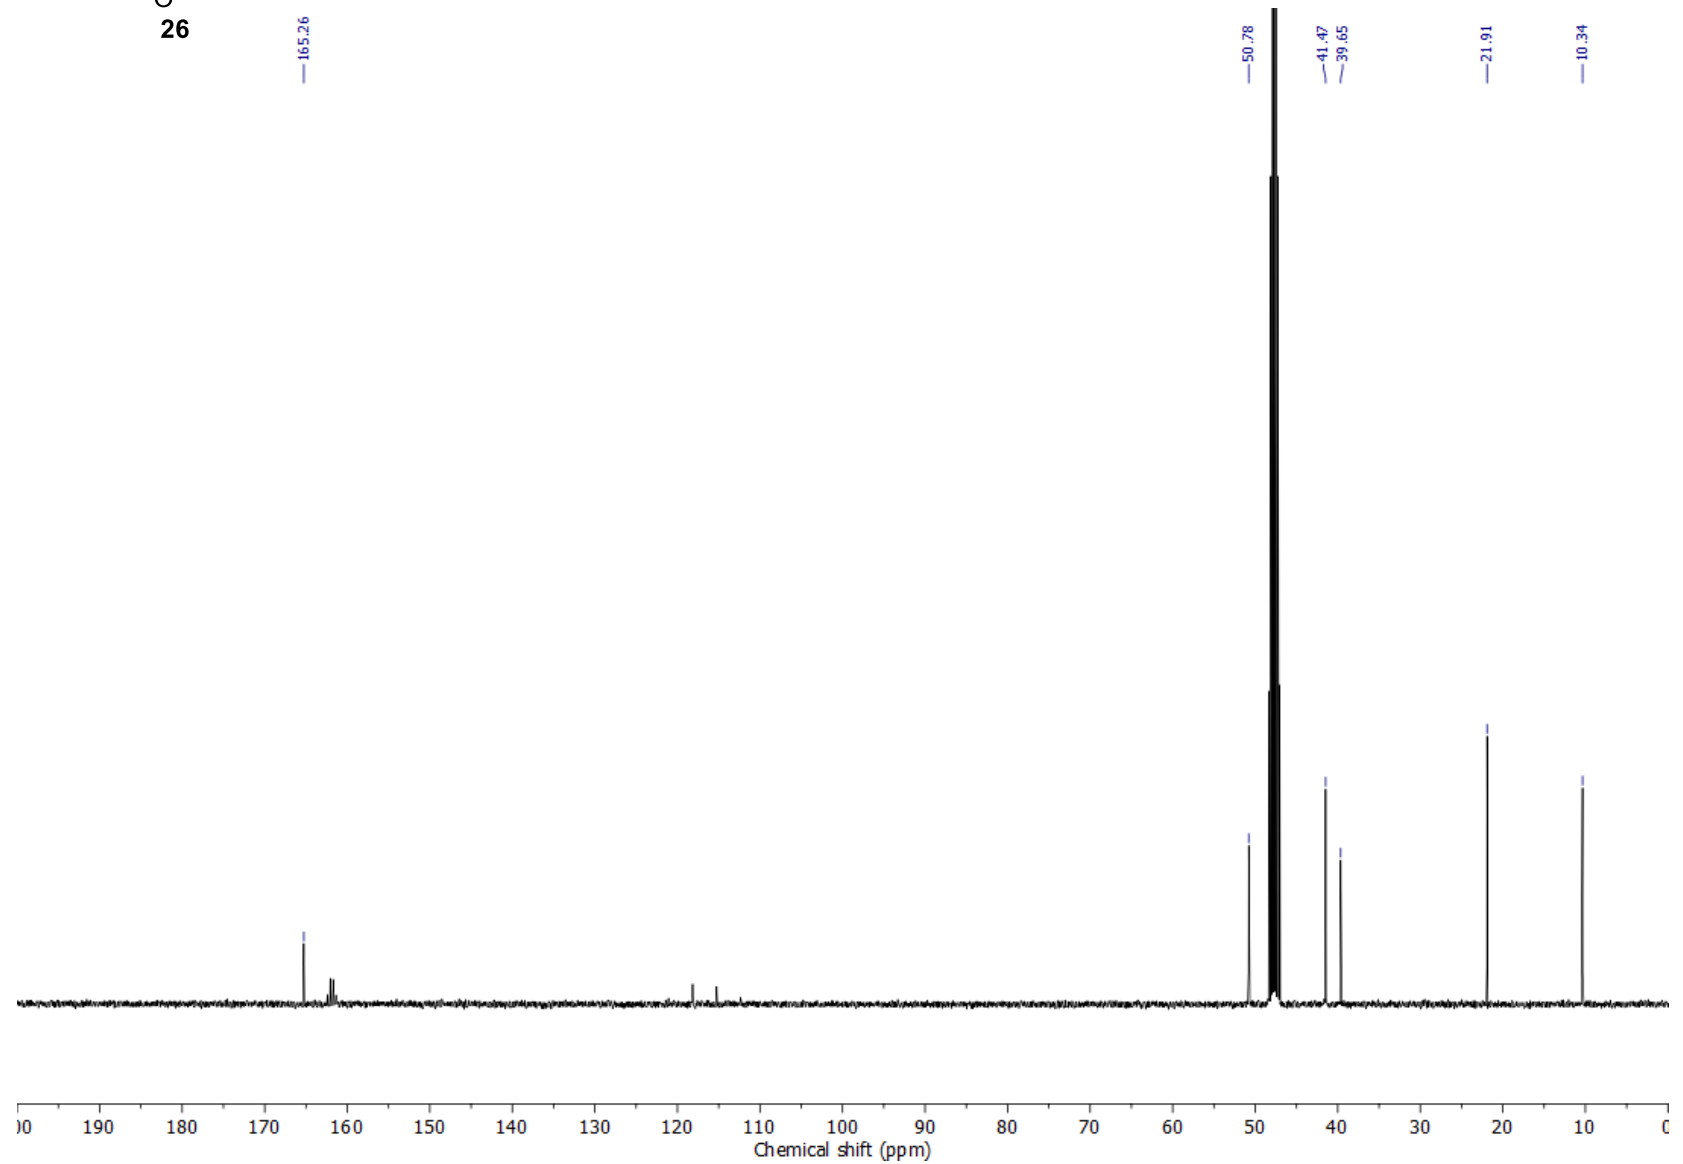

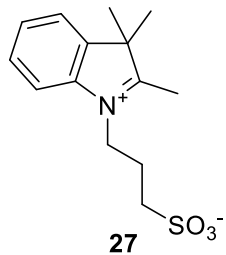

# <sup>1</sup>H NMR (400 MHz, MeOD)

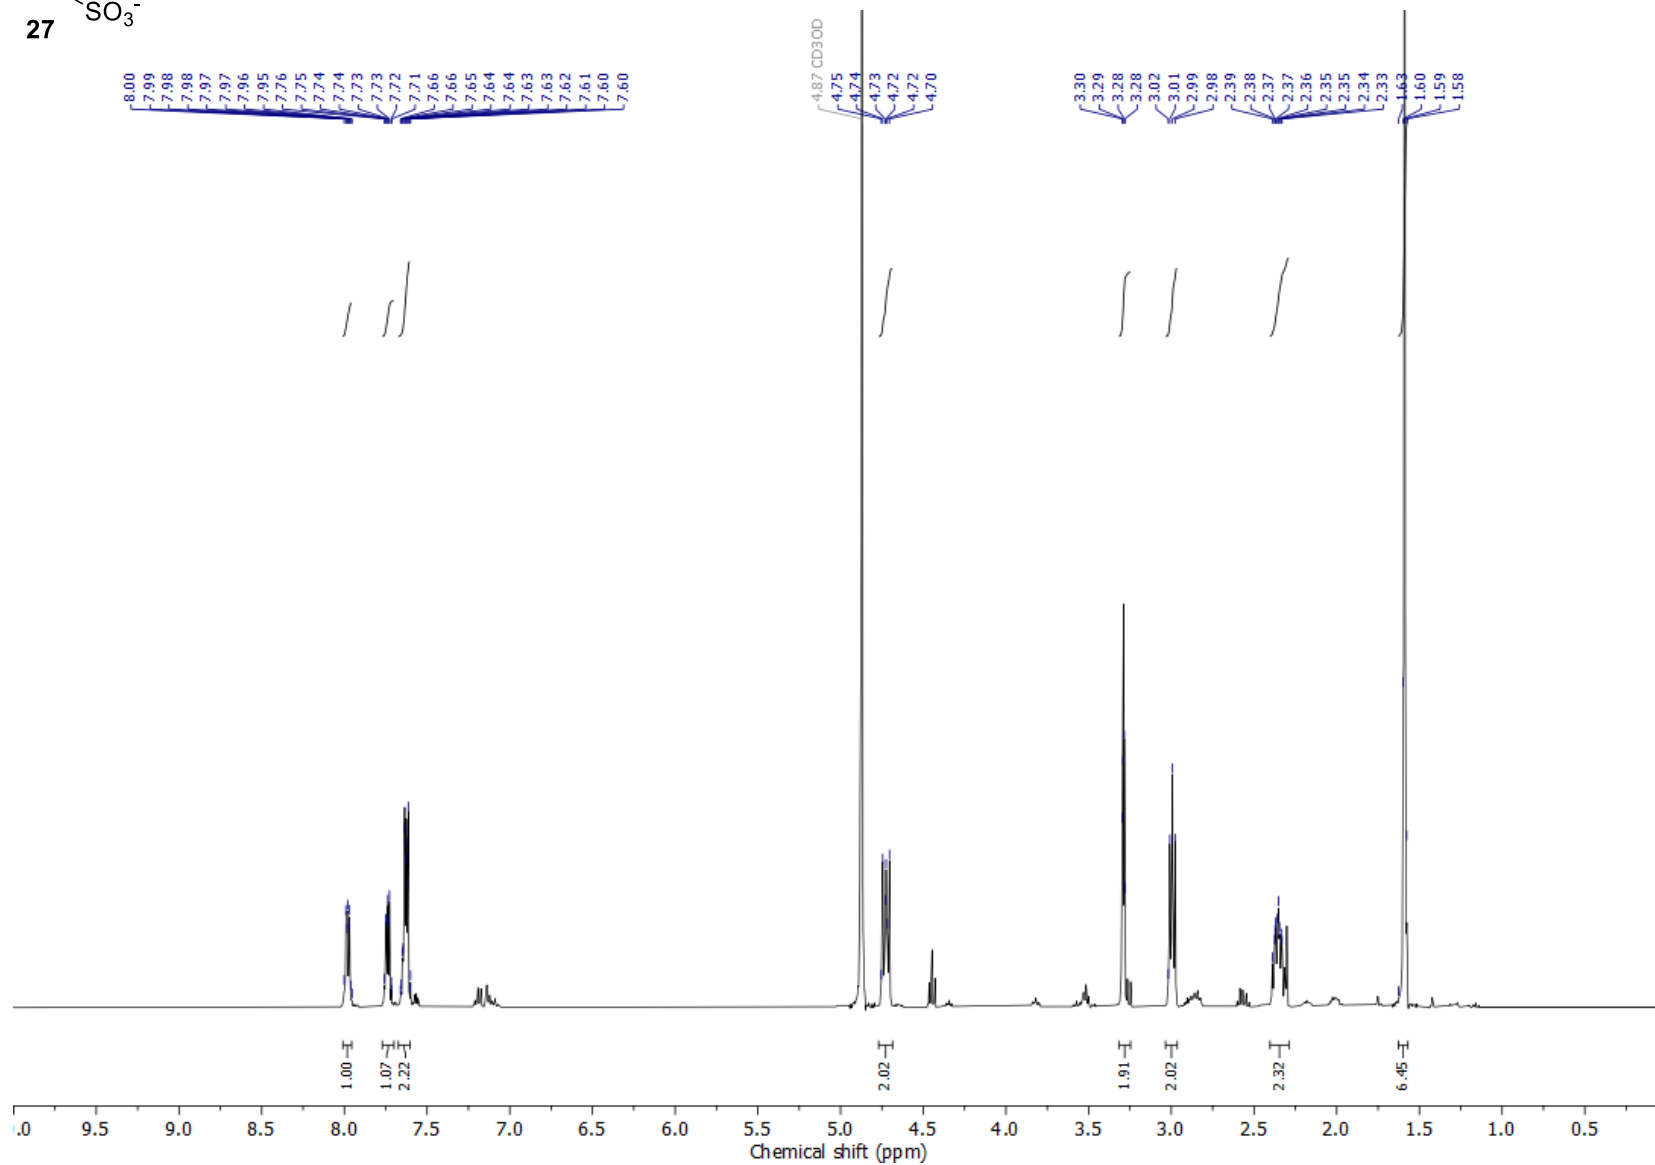

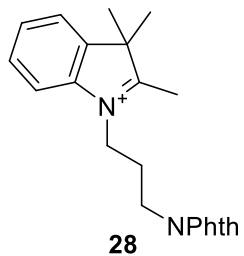

# <sup>1</sup>H NMR (400 MHz, MeOD)

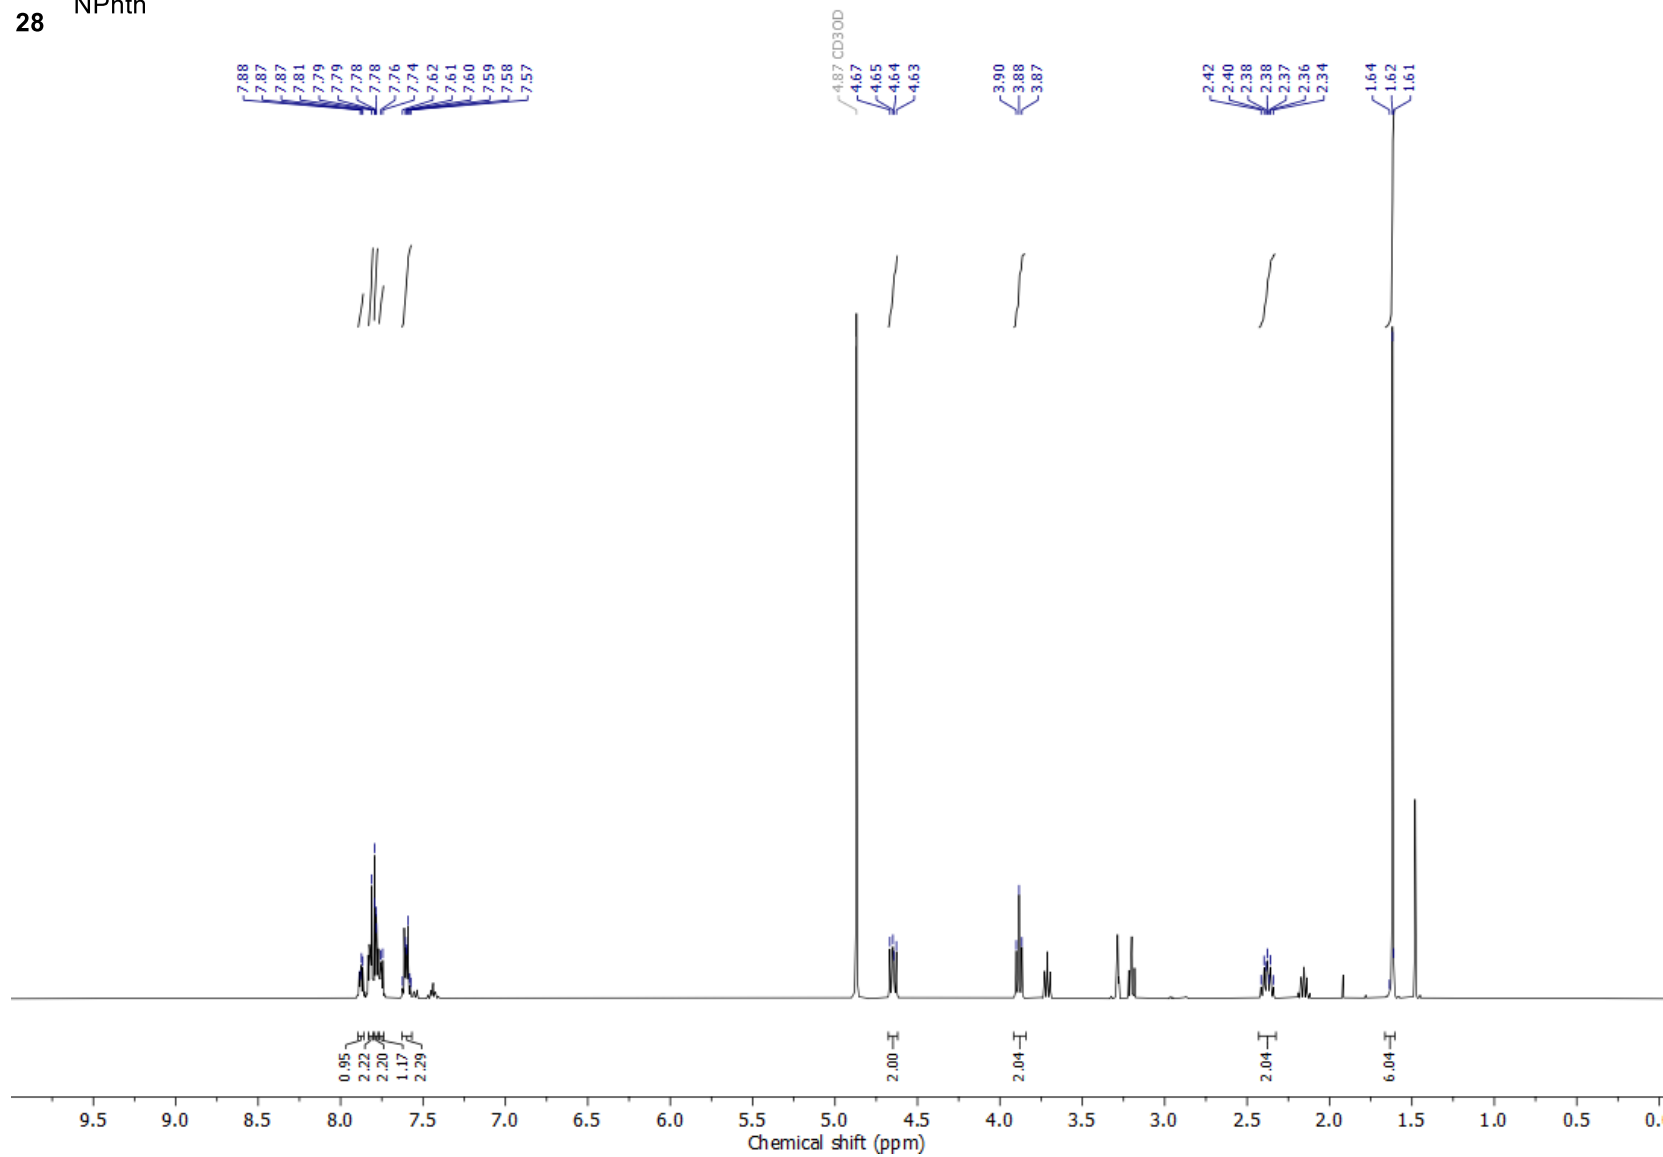



# $^{13}\text{C}$ NMR (100 MHz, MeOD)

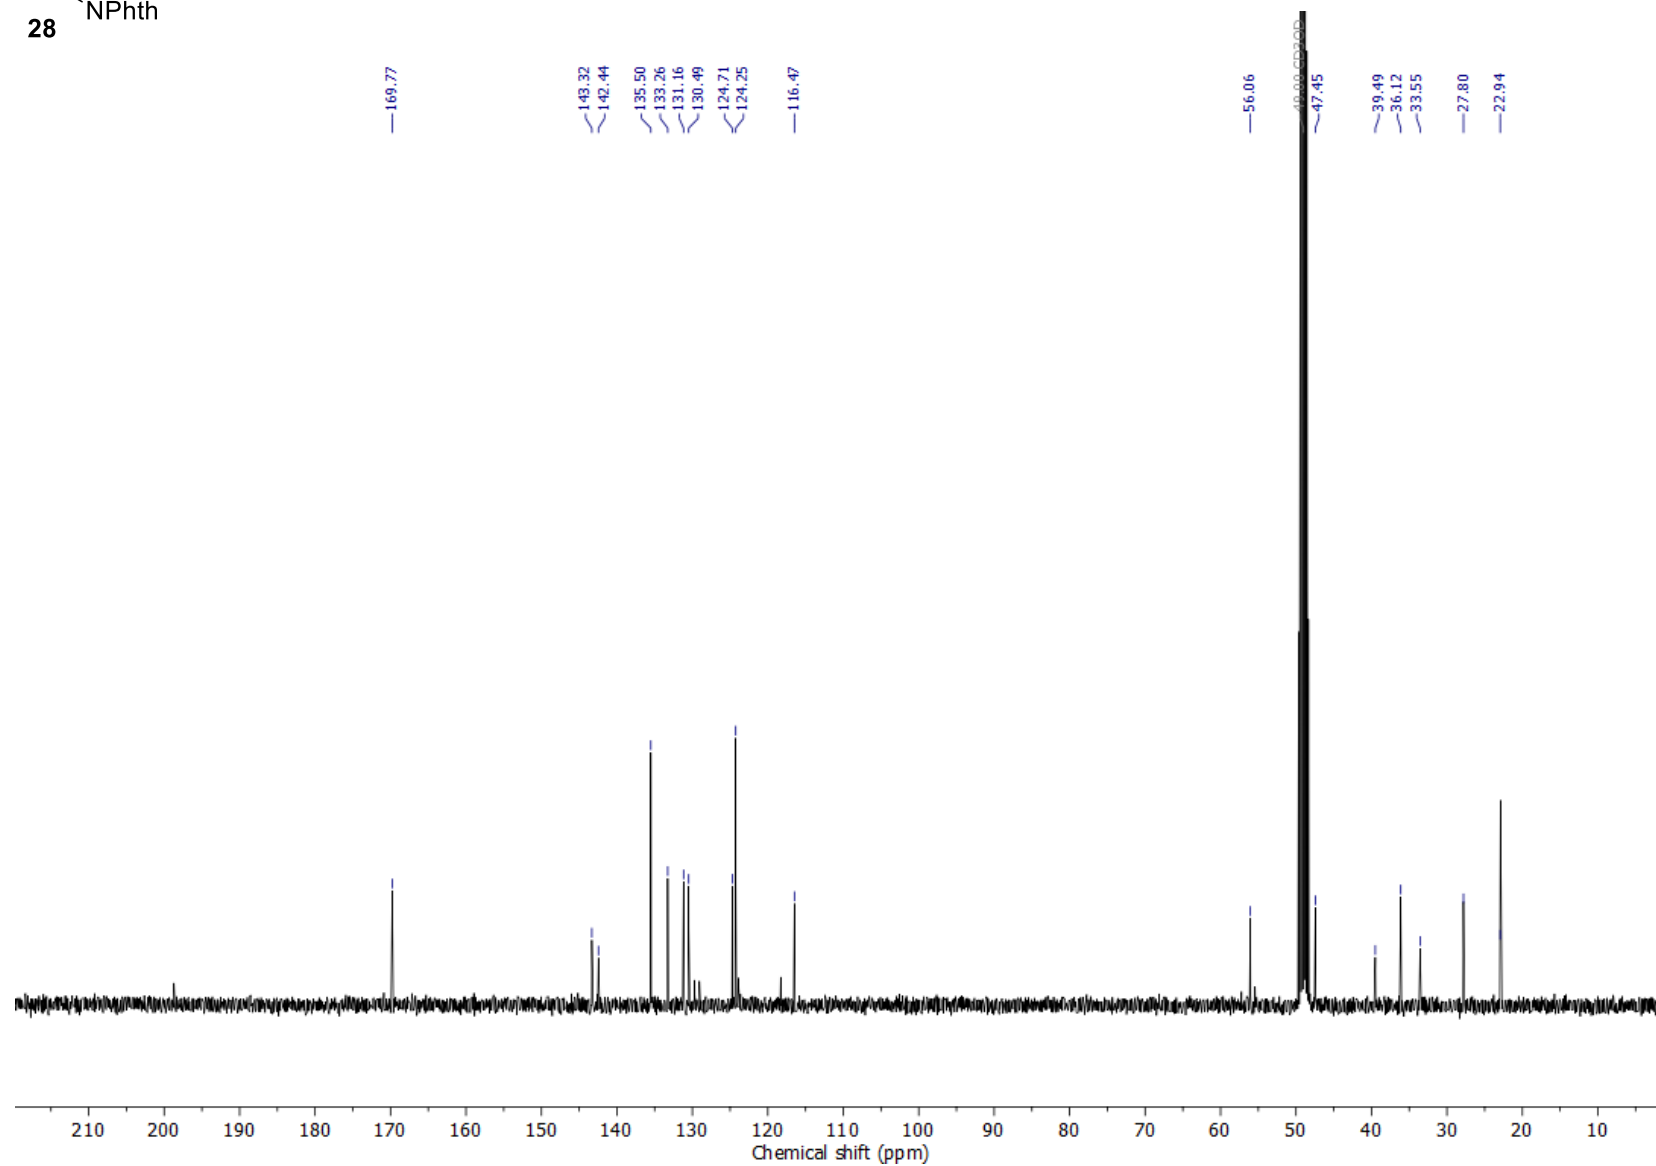

# $^1\text{H}$ NMR (400 MHz, $\text{CDCl}_3$ )

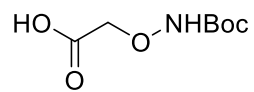

**42**

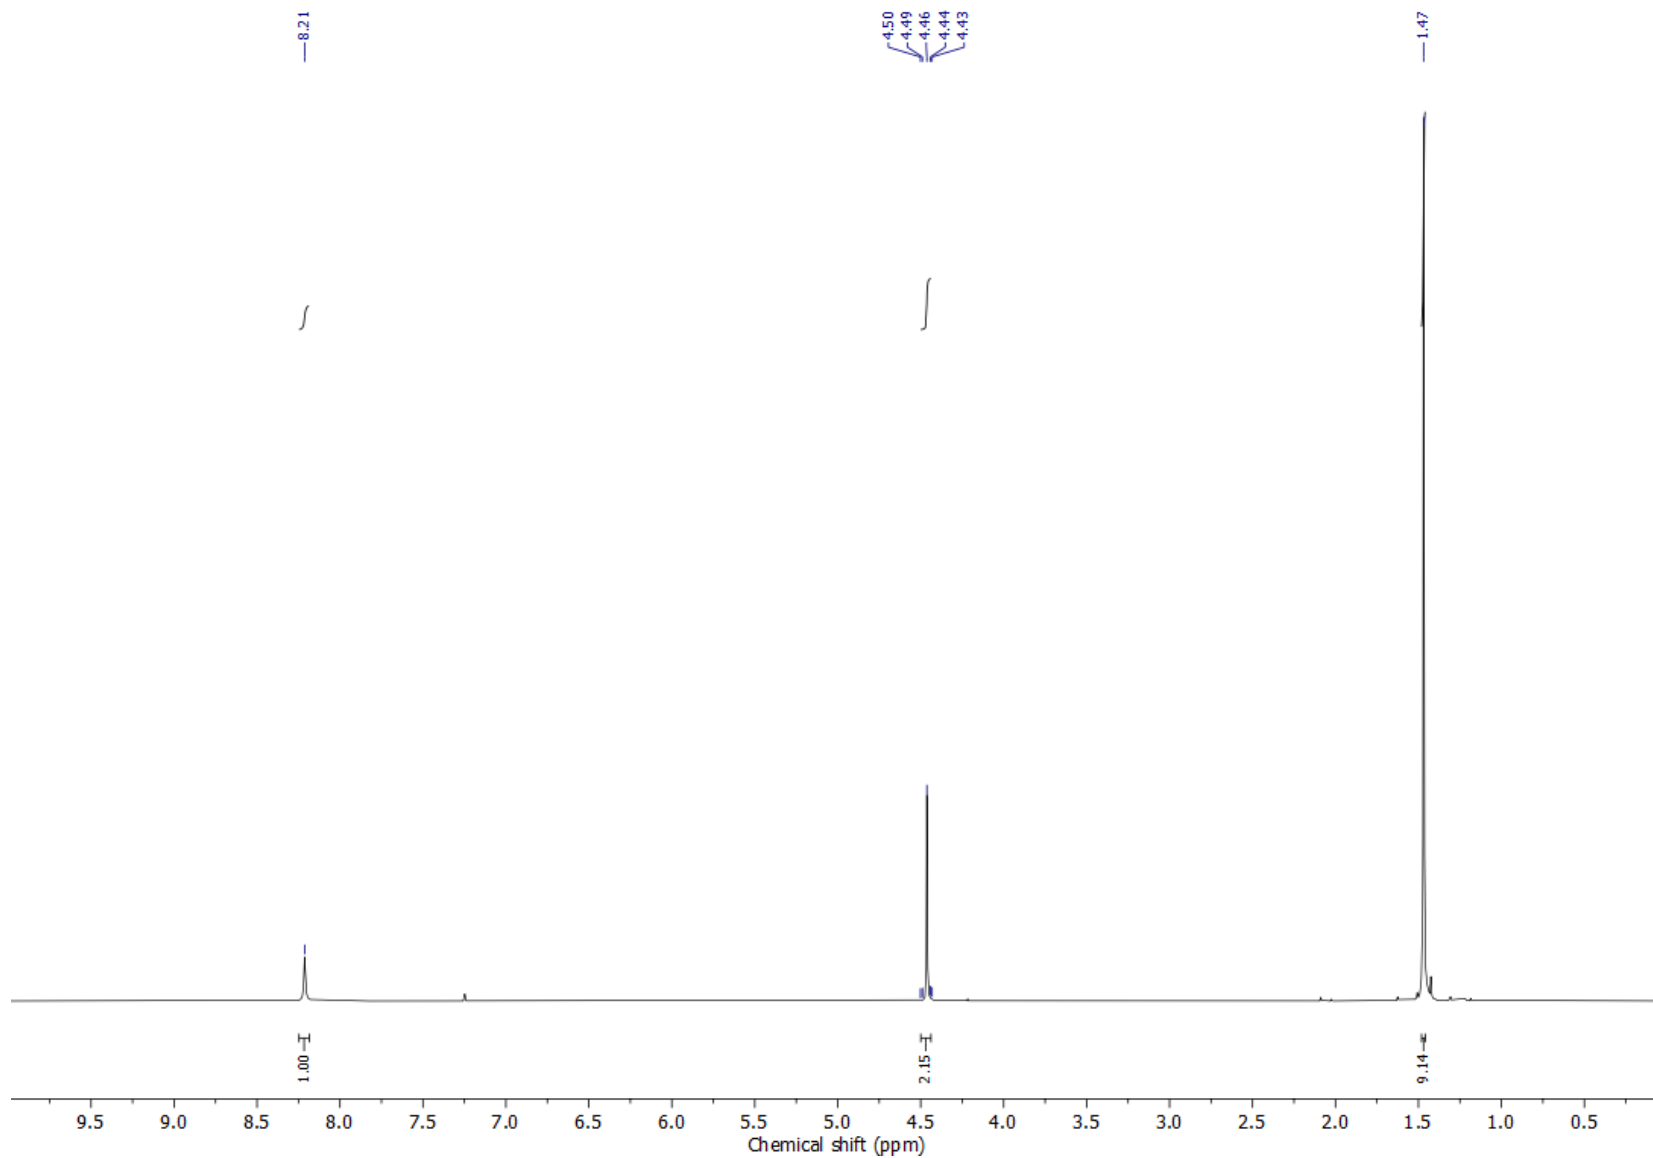

# $^{13}\text{C}$ NMR (100 MHz, $\text{CDCl}_3$ )

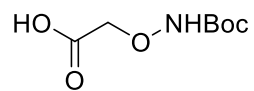

42

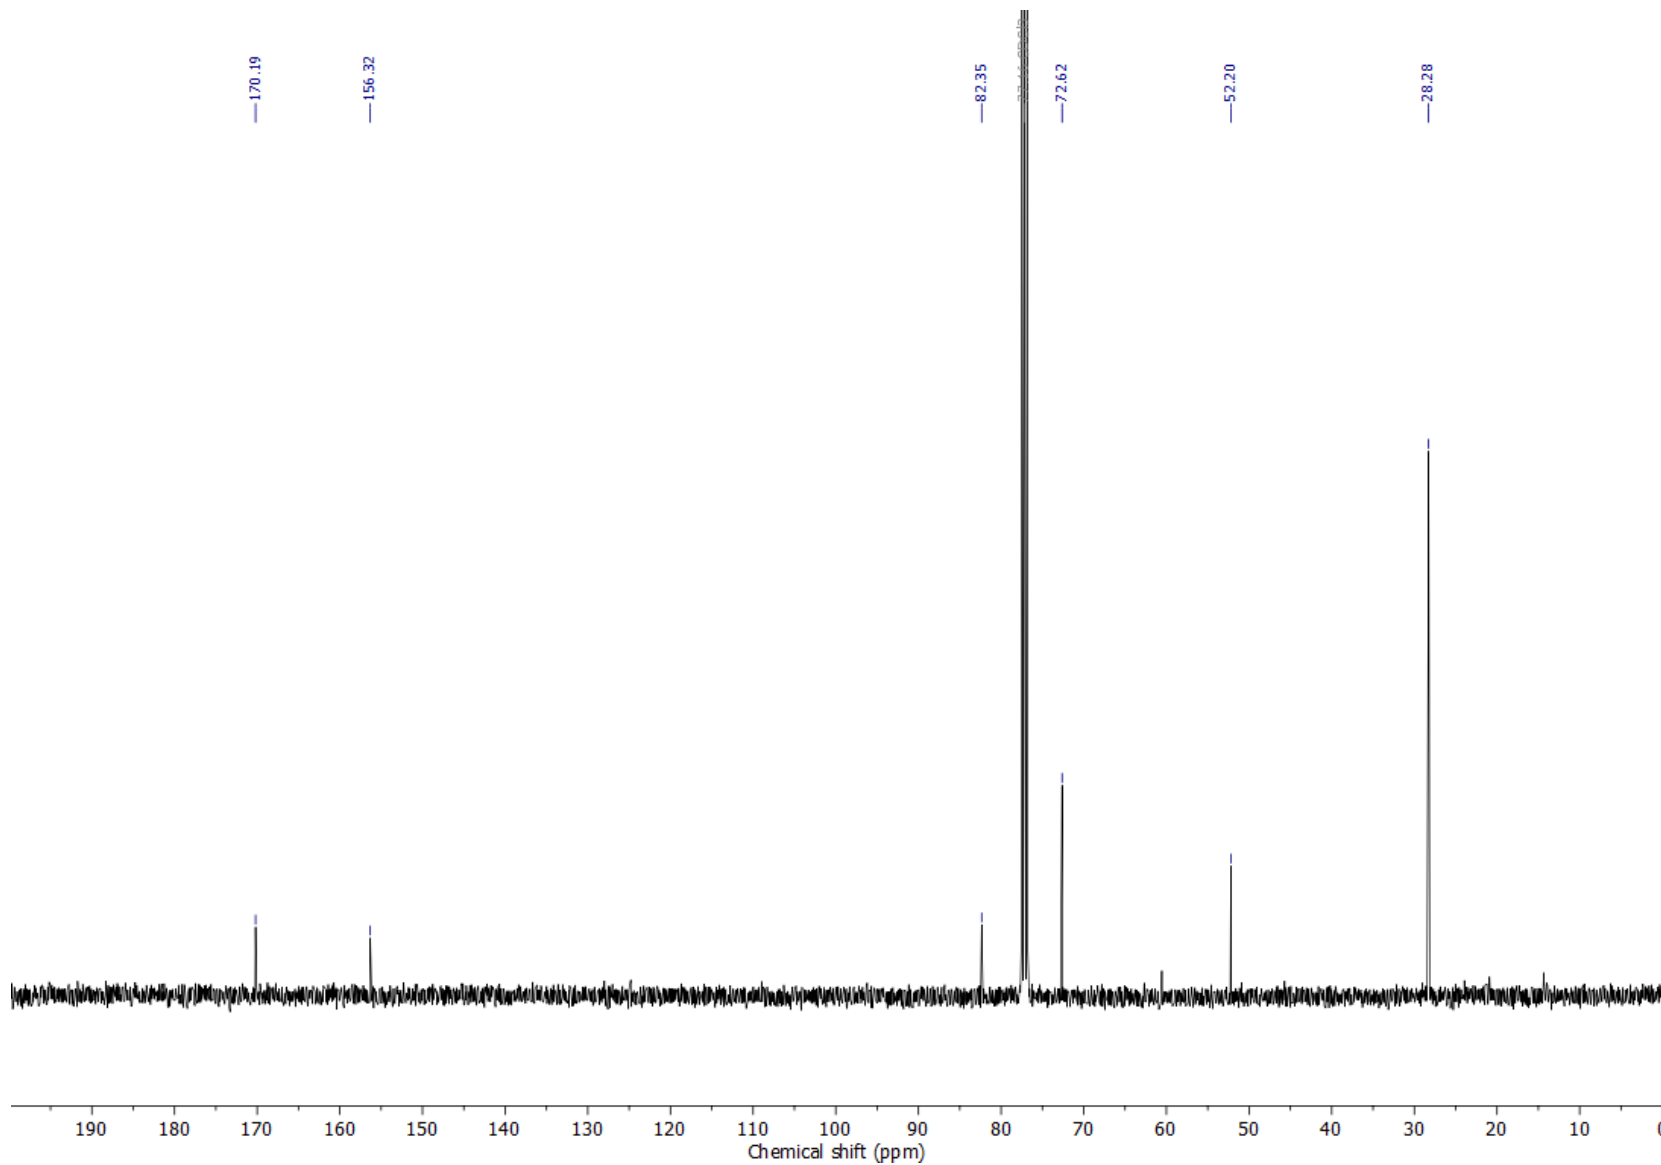

# $^1\text{H}$ NMR (400 MHz, $\text{CDCl}_3$ )

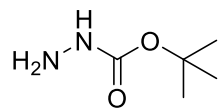

**43**

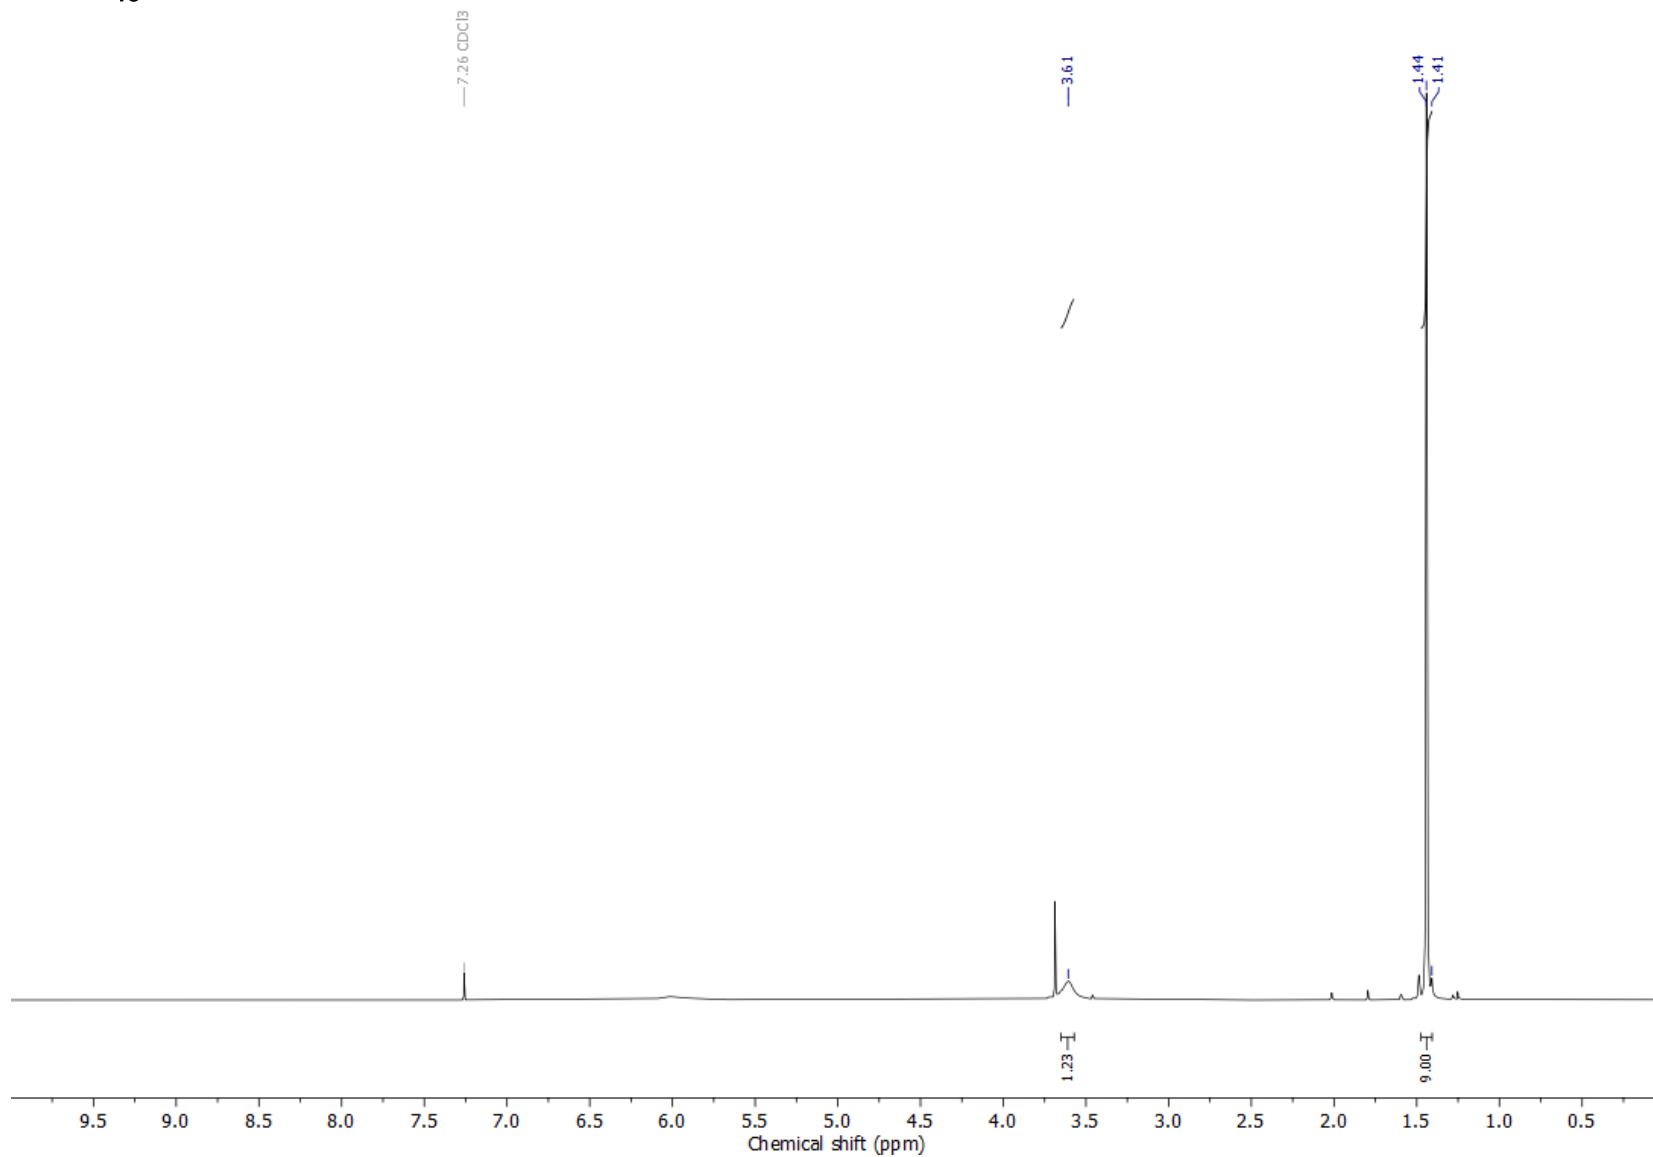

# $^{13}\text{C}$ NMR (100 MHz, $\text{CDCl}_3$ )

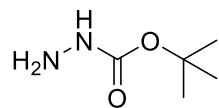

**43**

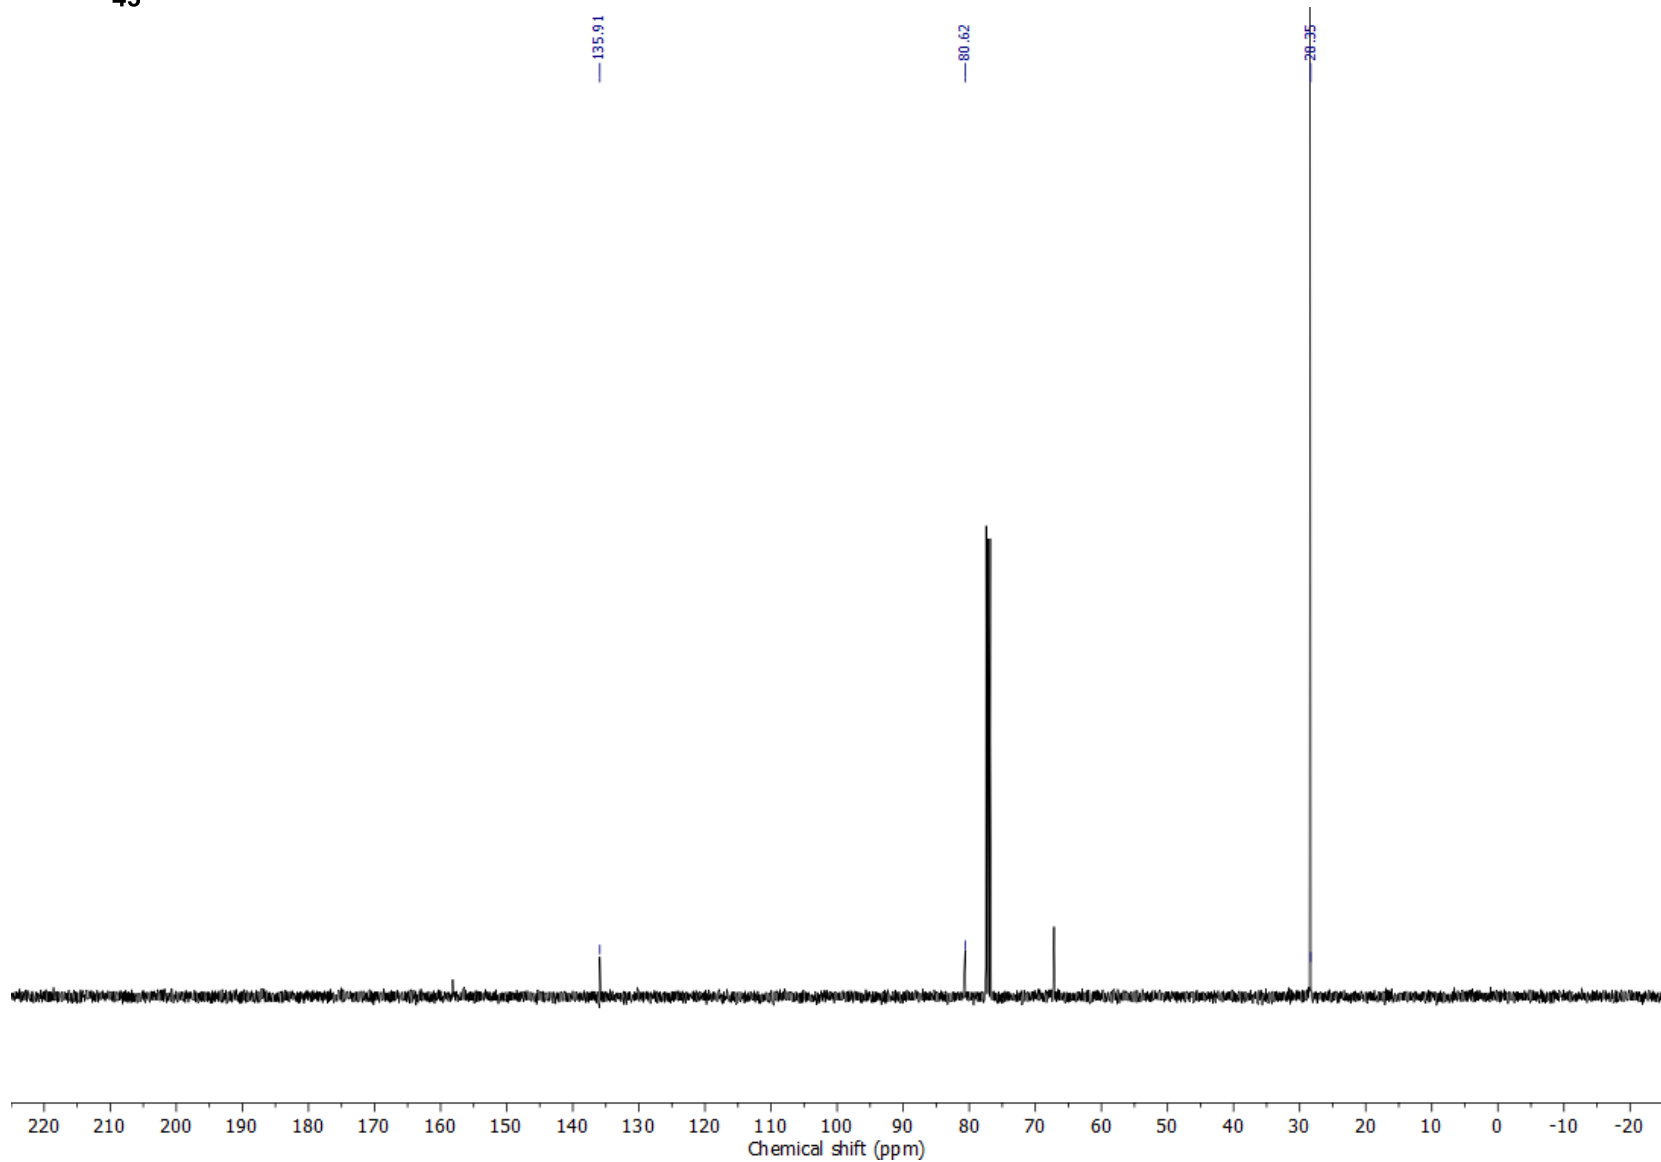

# $^1\text{H}$ NMR (400 MHz, $\text{CDCl}_3$ )

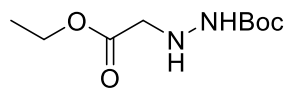

**44**

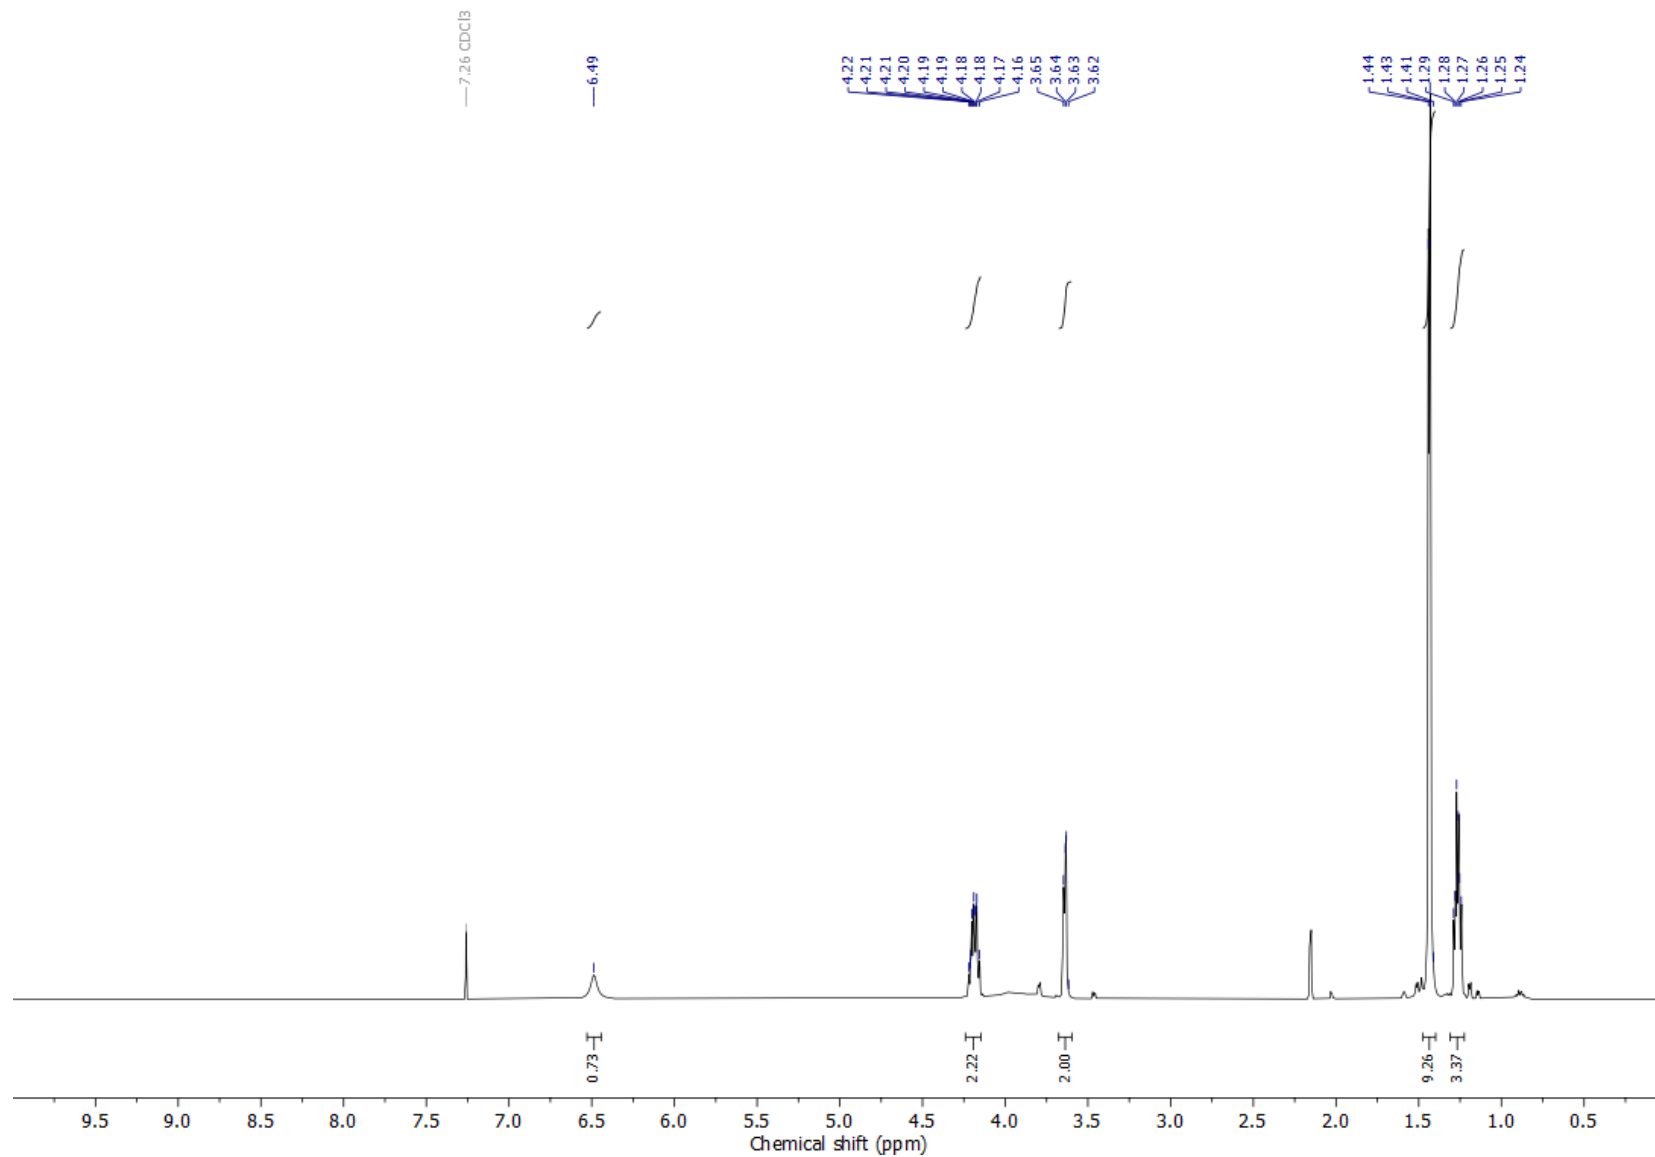

# $^{13}\text{C}$ NMR (100 MHz, $\text{CDCl}_3$ )

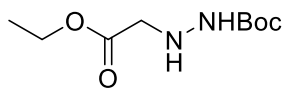

44

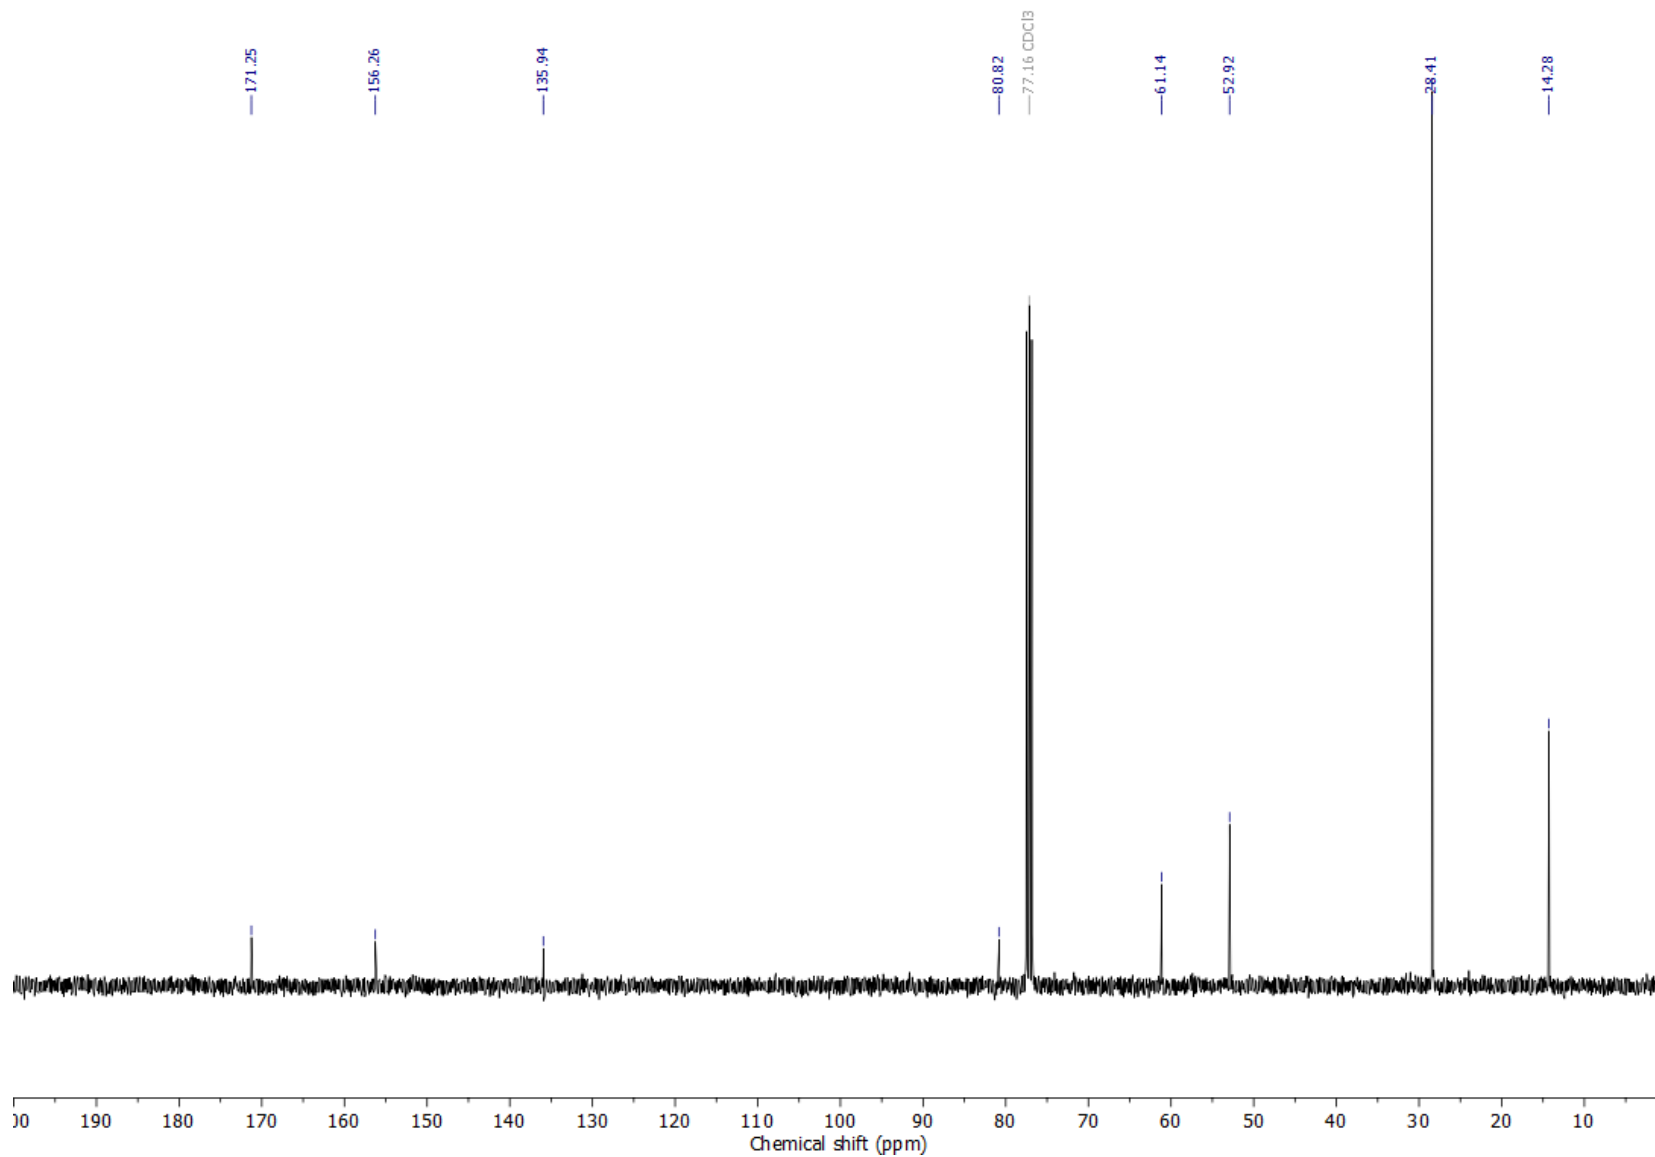

# $^1\text{H}$ NMR (400 MHz, MeOD)

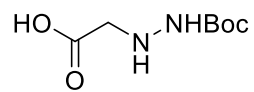

45

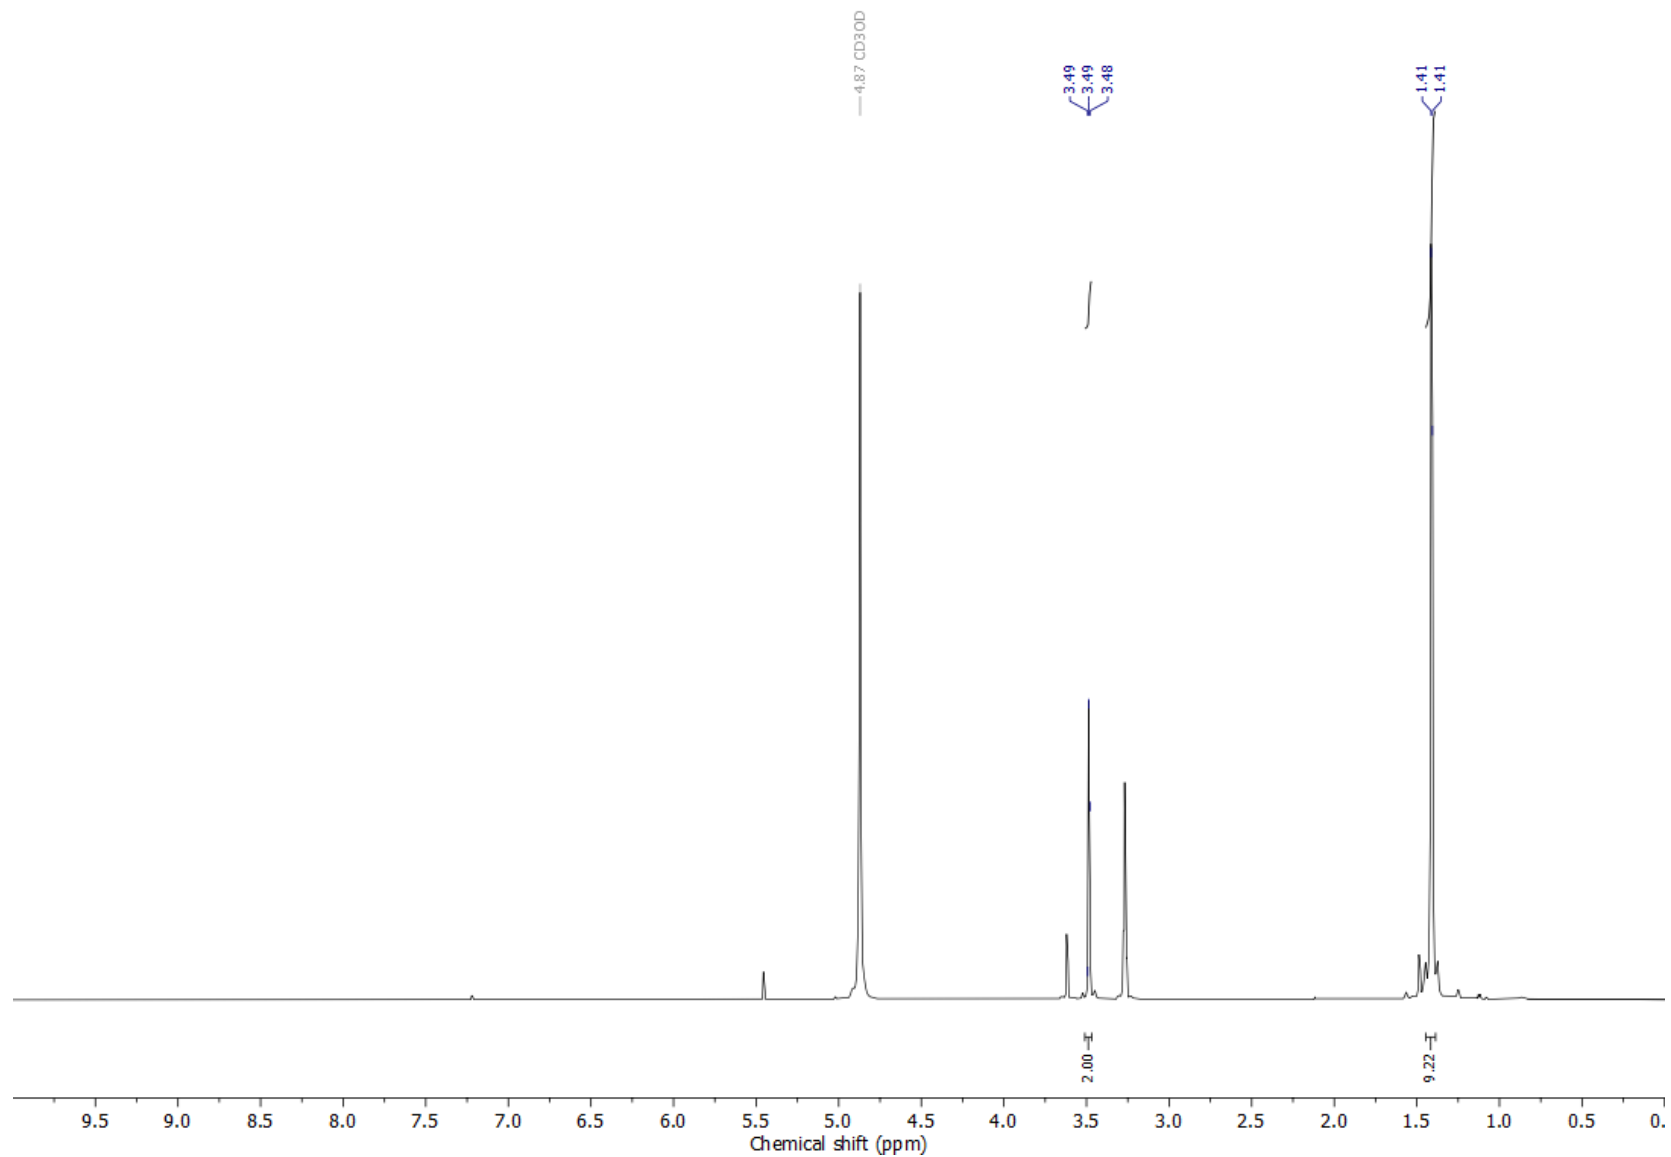

# $^{13}\text{C}$ NMR (100 MHz, MeOD)



45

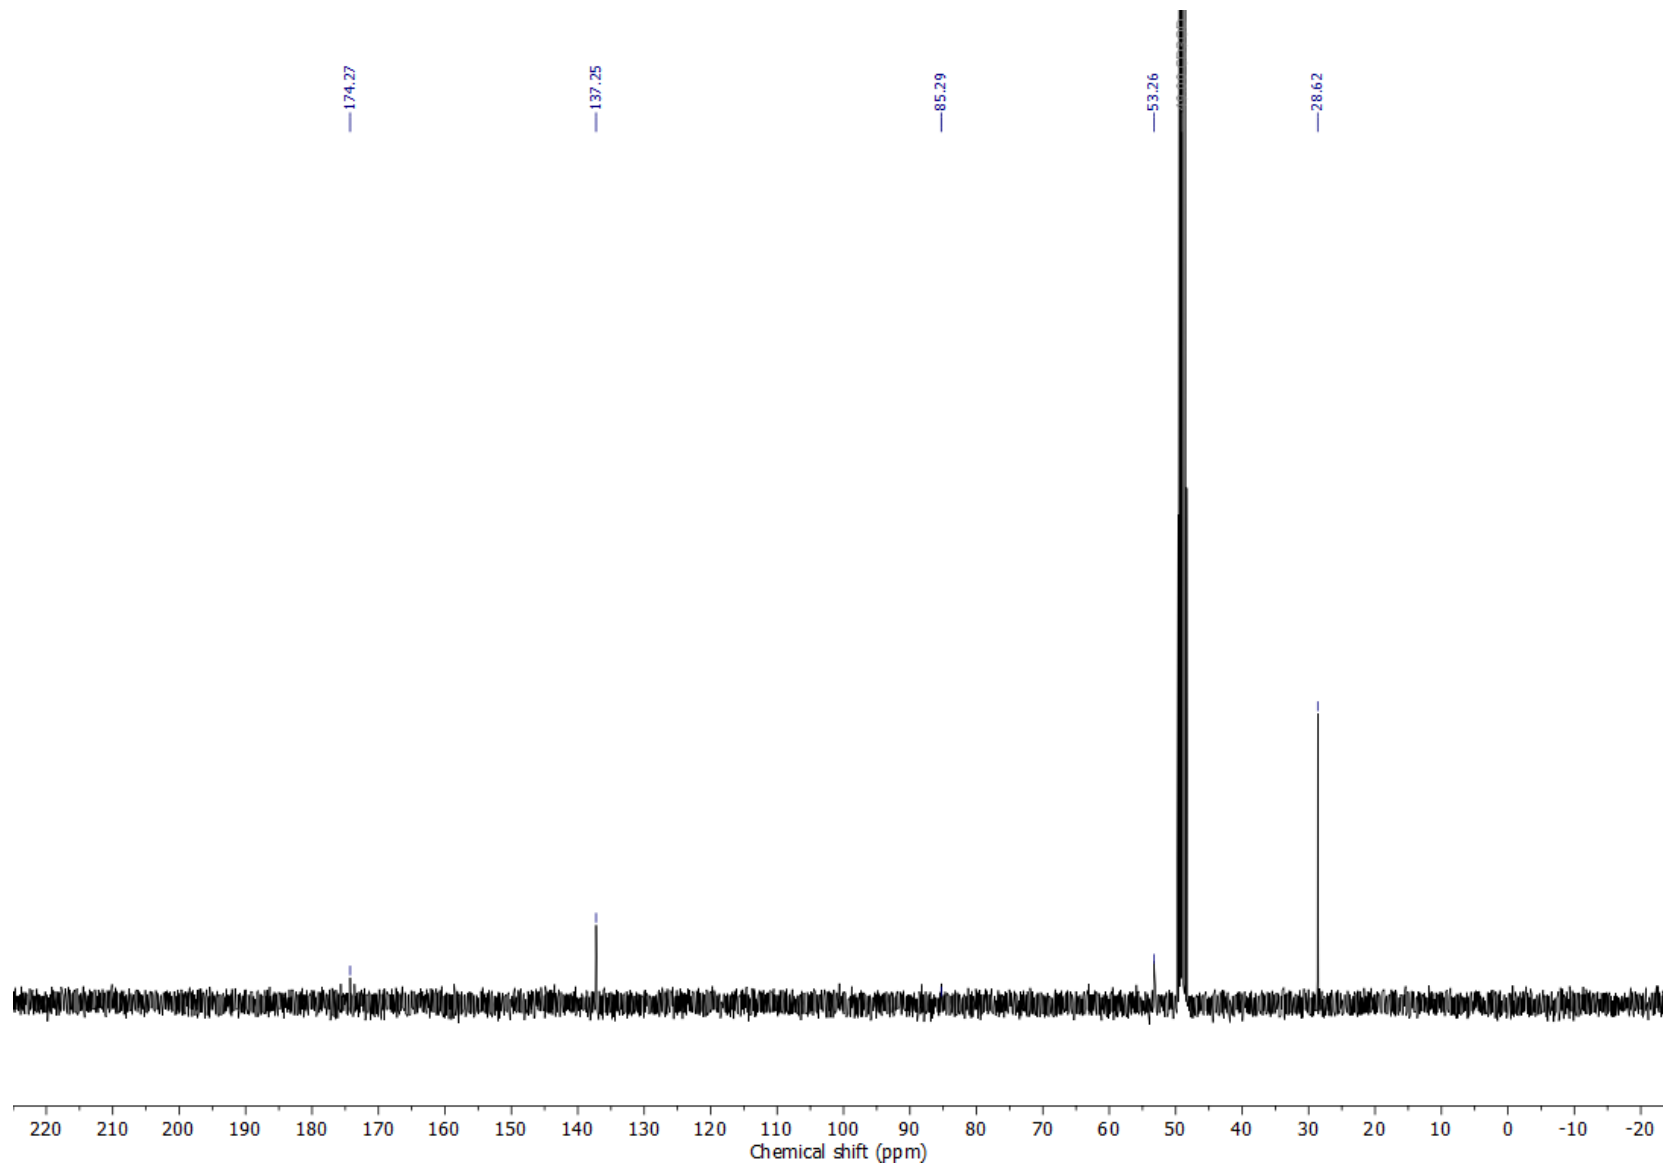

# $^1\text{H}$ NMR (600 MHz, MeOD)

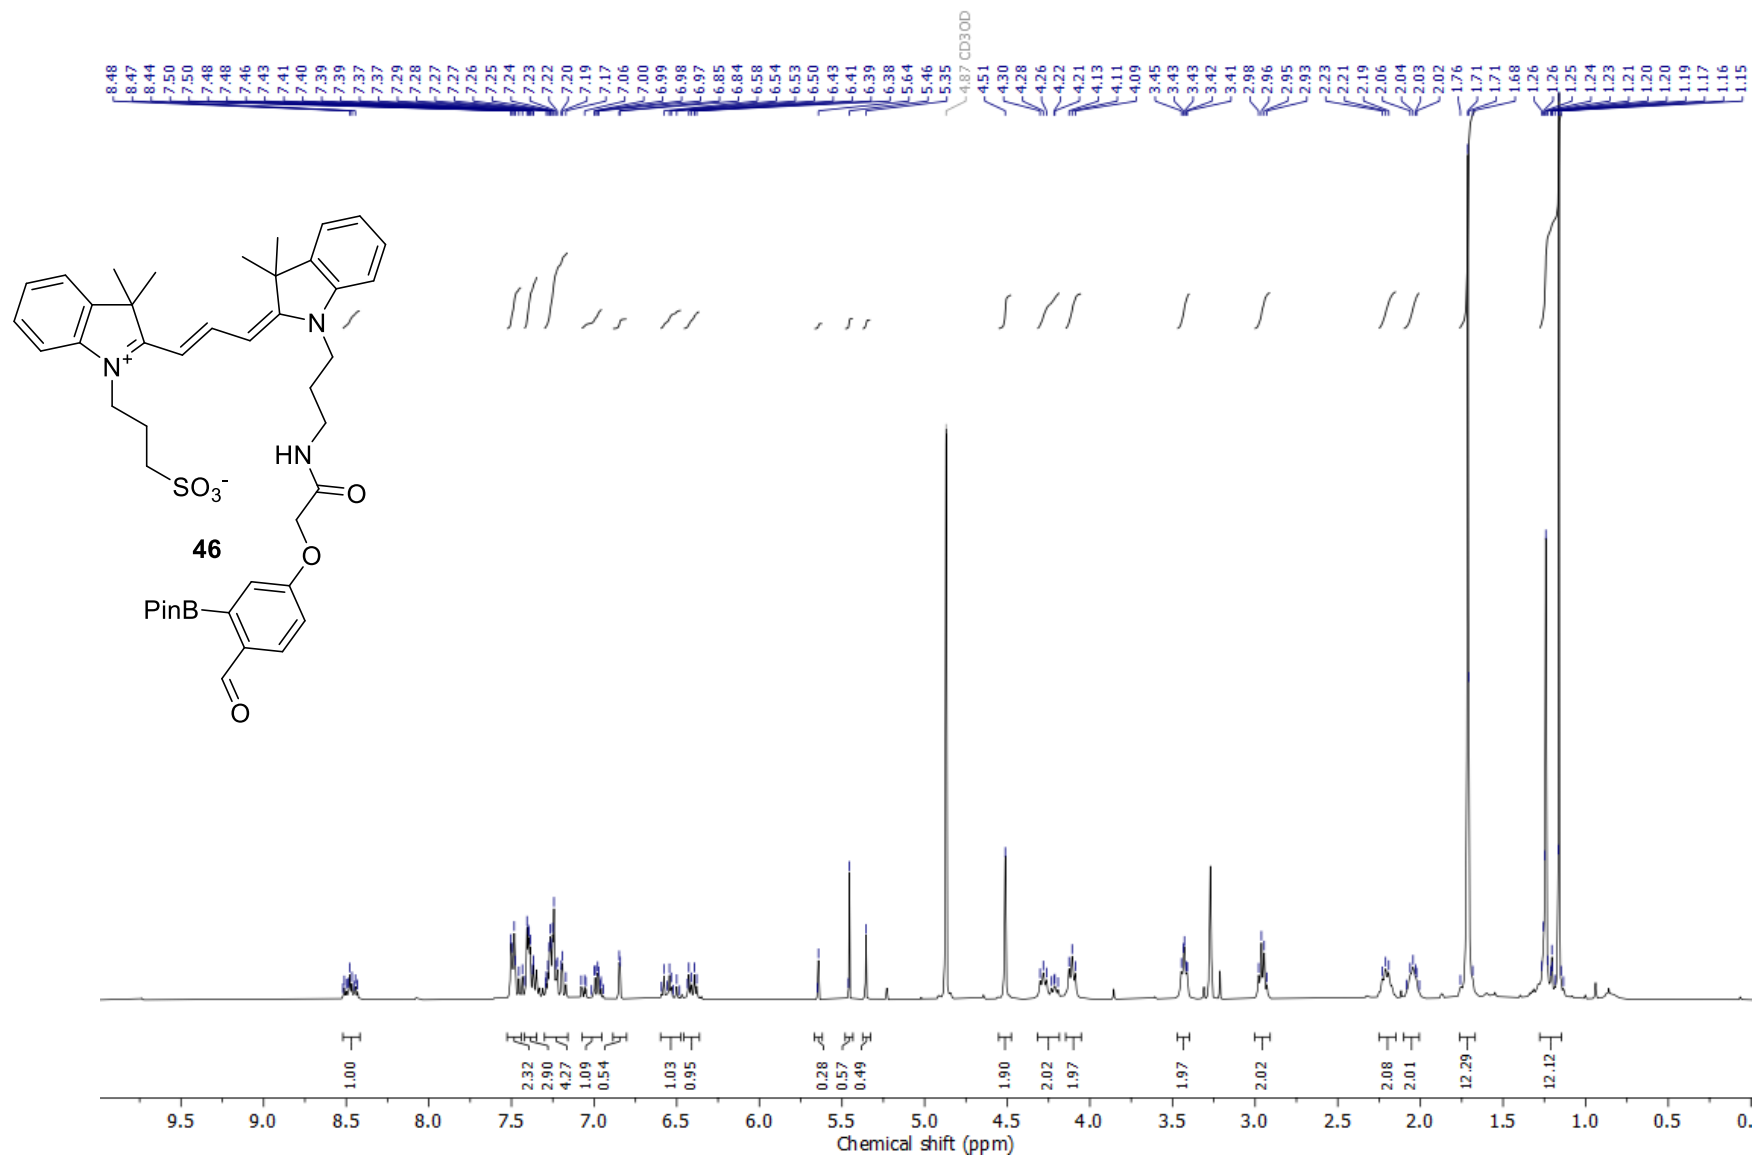

# $^{13}\text{C}$ NMR(600 MHz, MeOD)

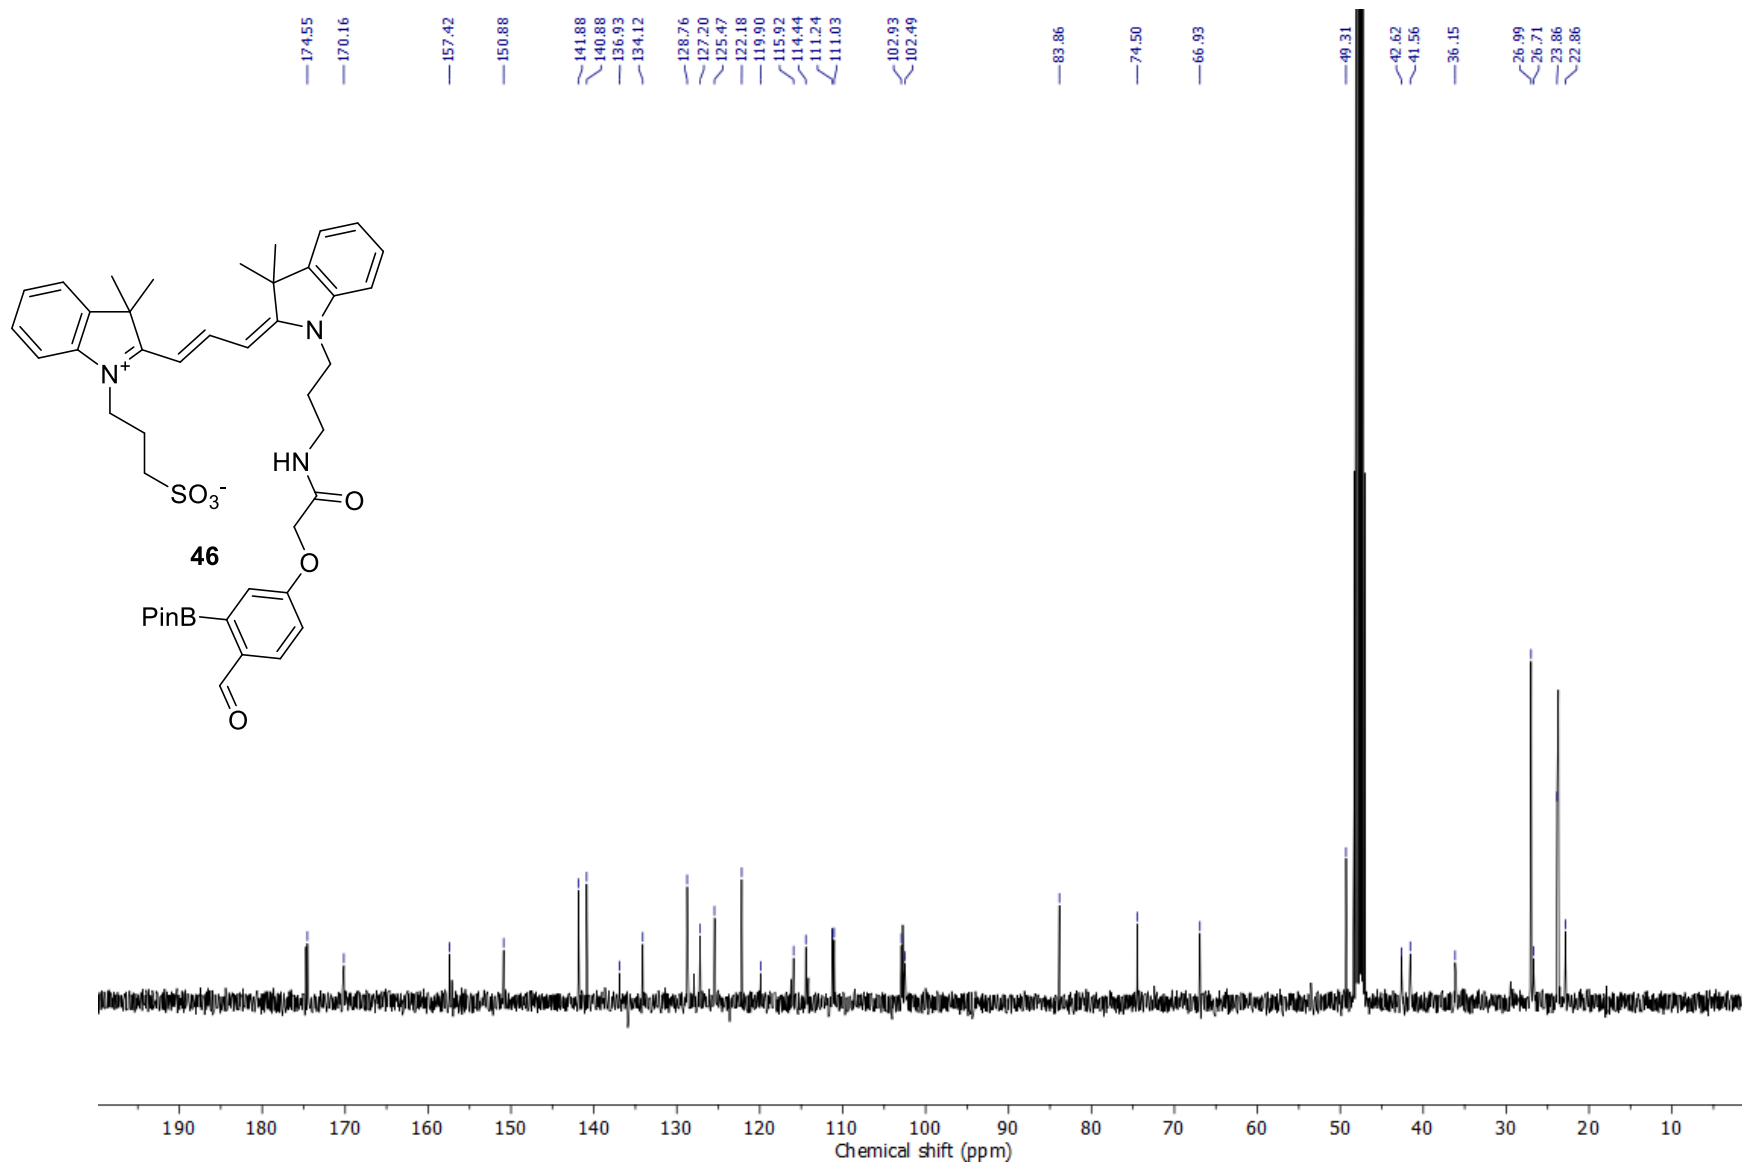

# <sup>1</sup>H NMR (400 MHz, MeOD)

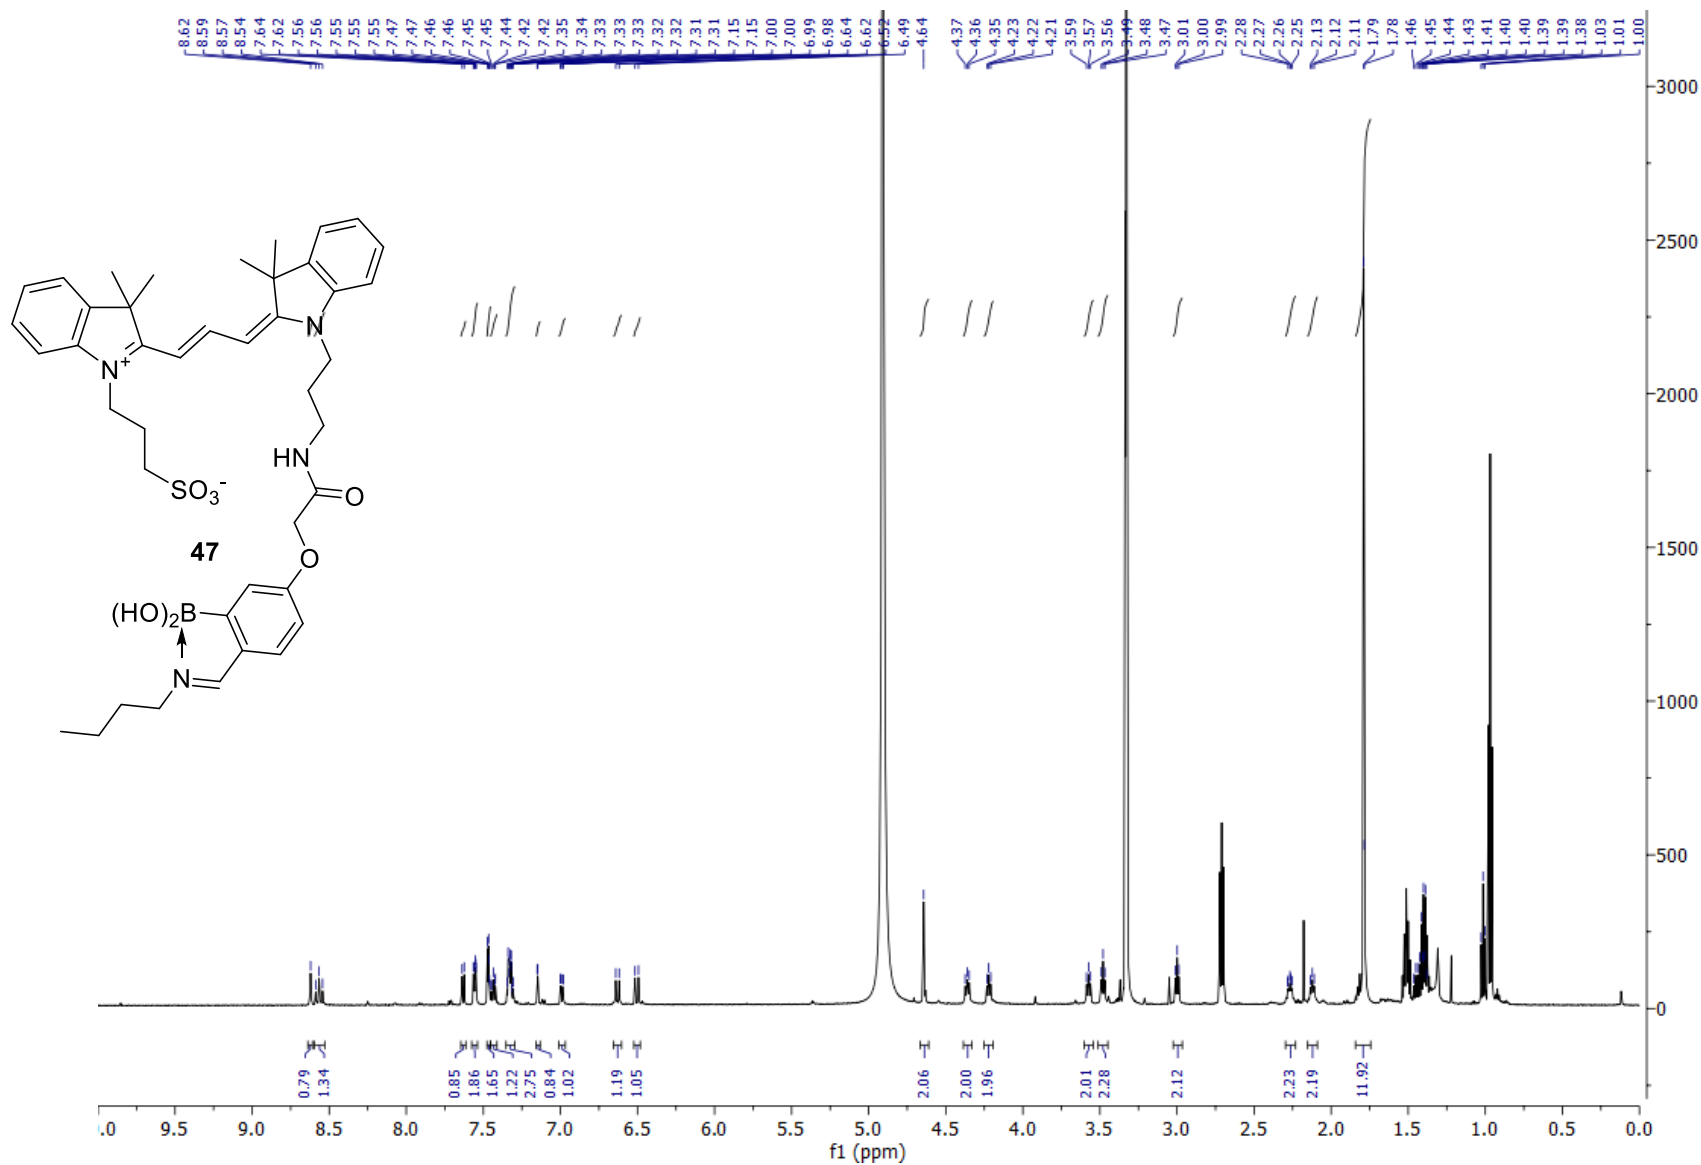

# <sup>1</sup>H NMR (400 MHz, MeOD)

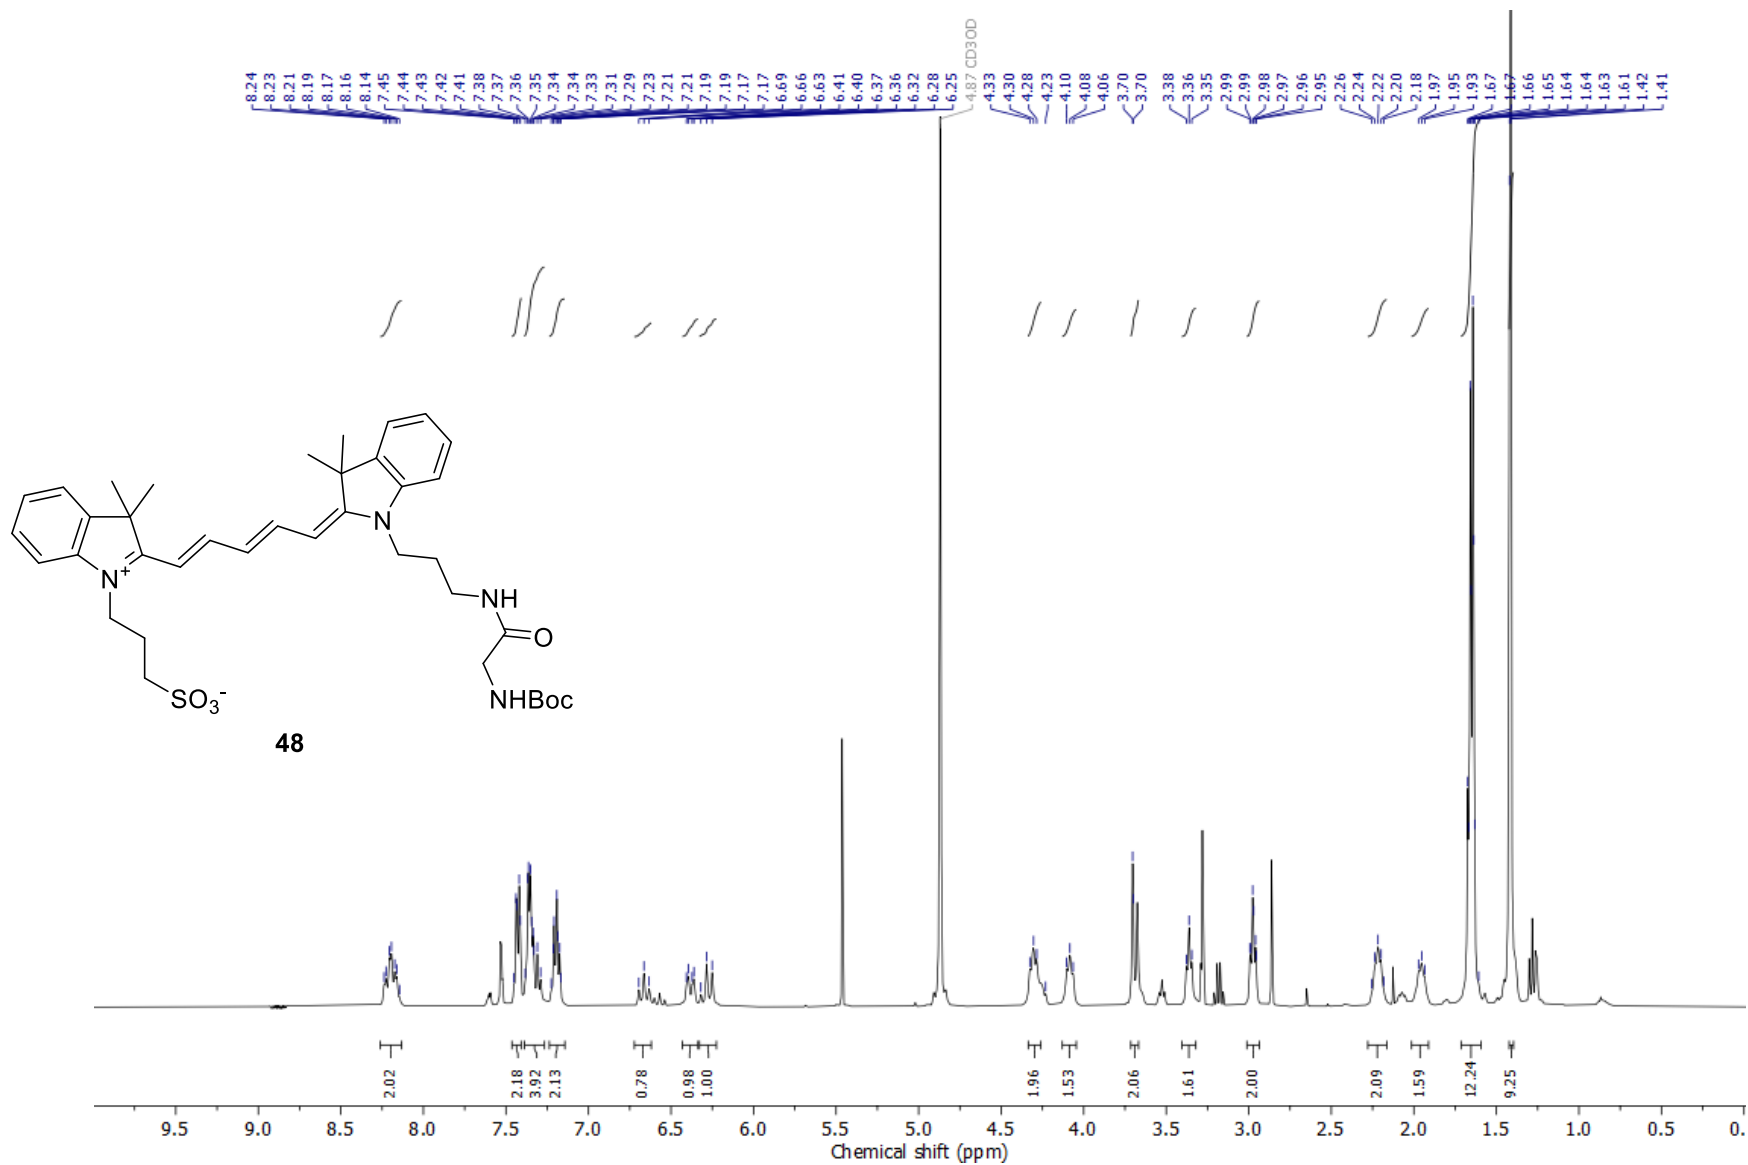

# $^{13}\text{C}$ NMR (100 MHz, MeOD)

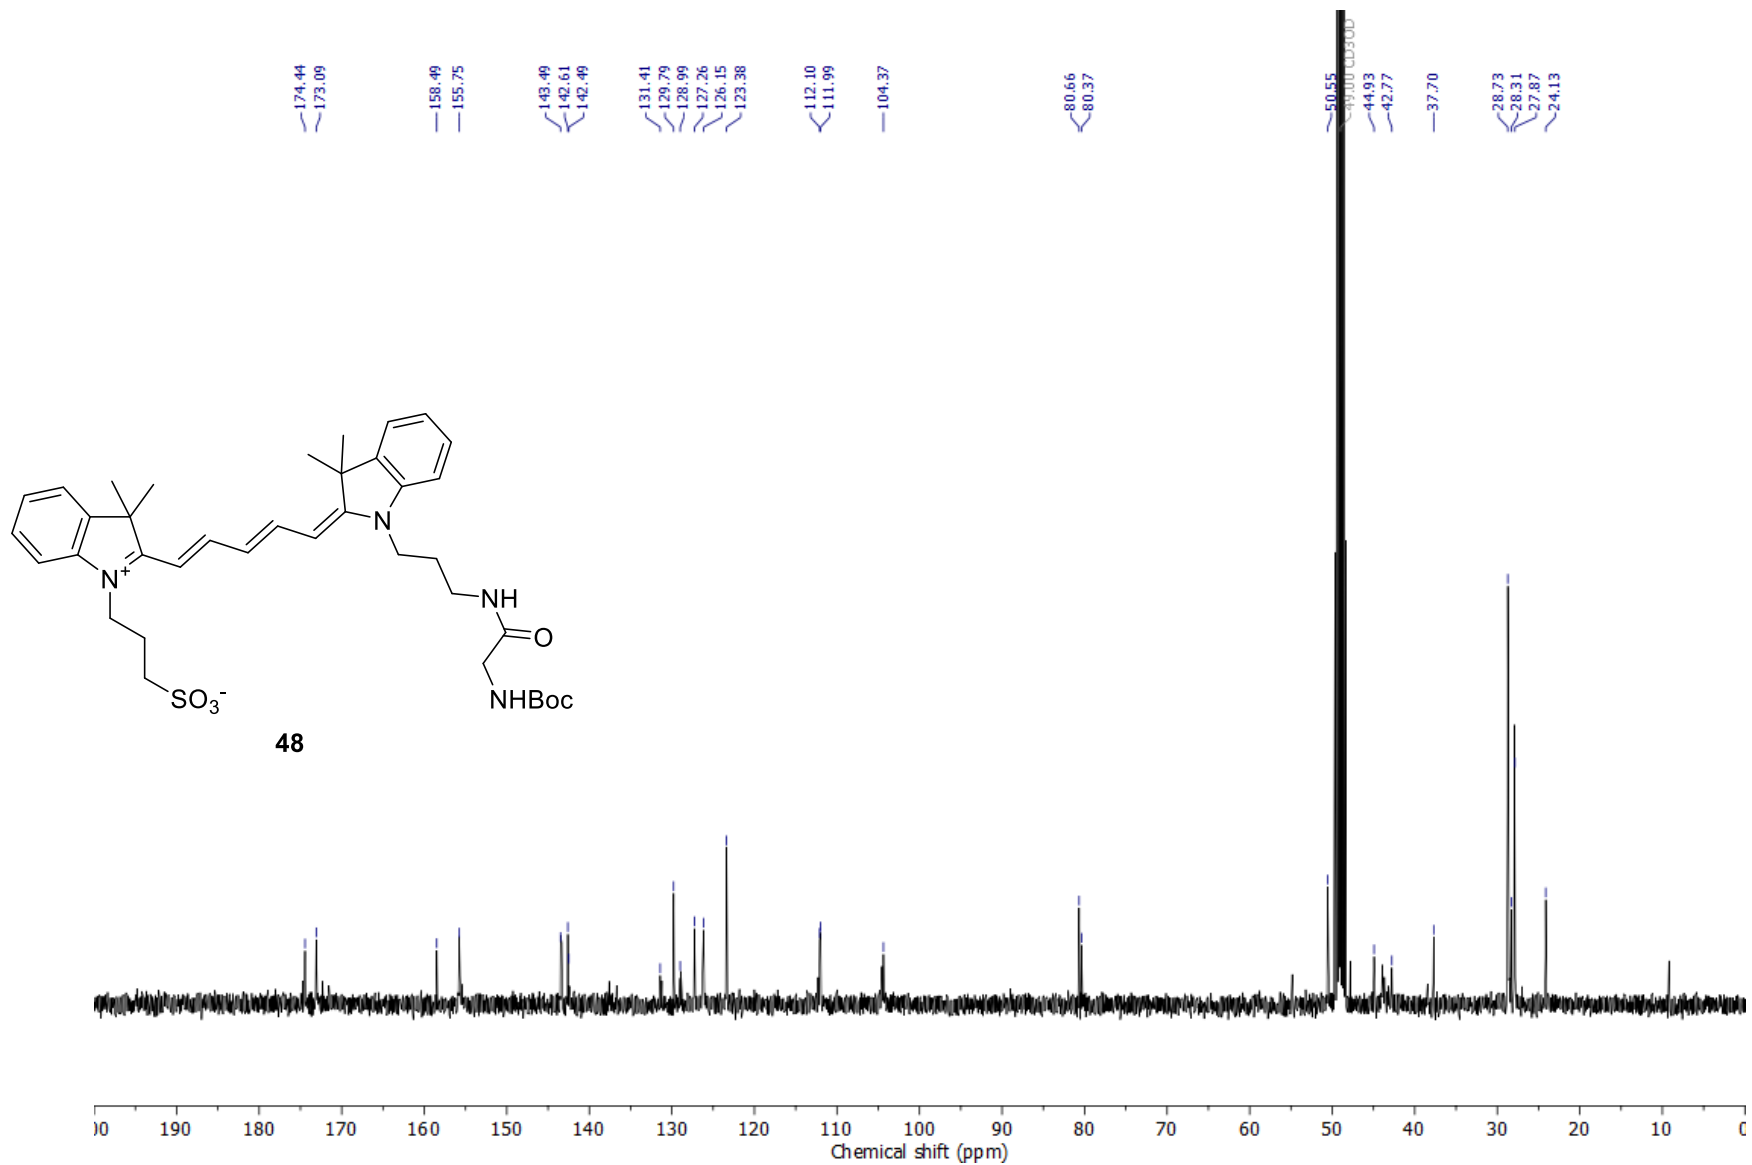

# <sup>1</sup>H NMR (400 MHz, MeOD)

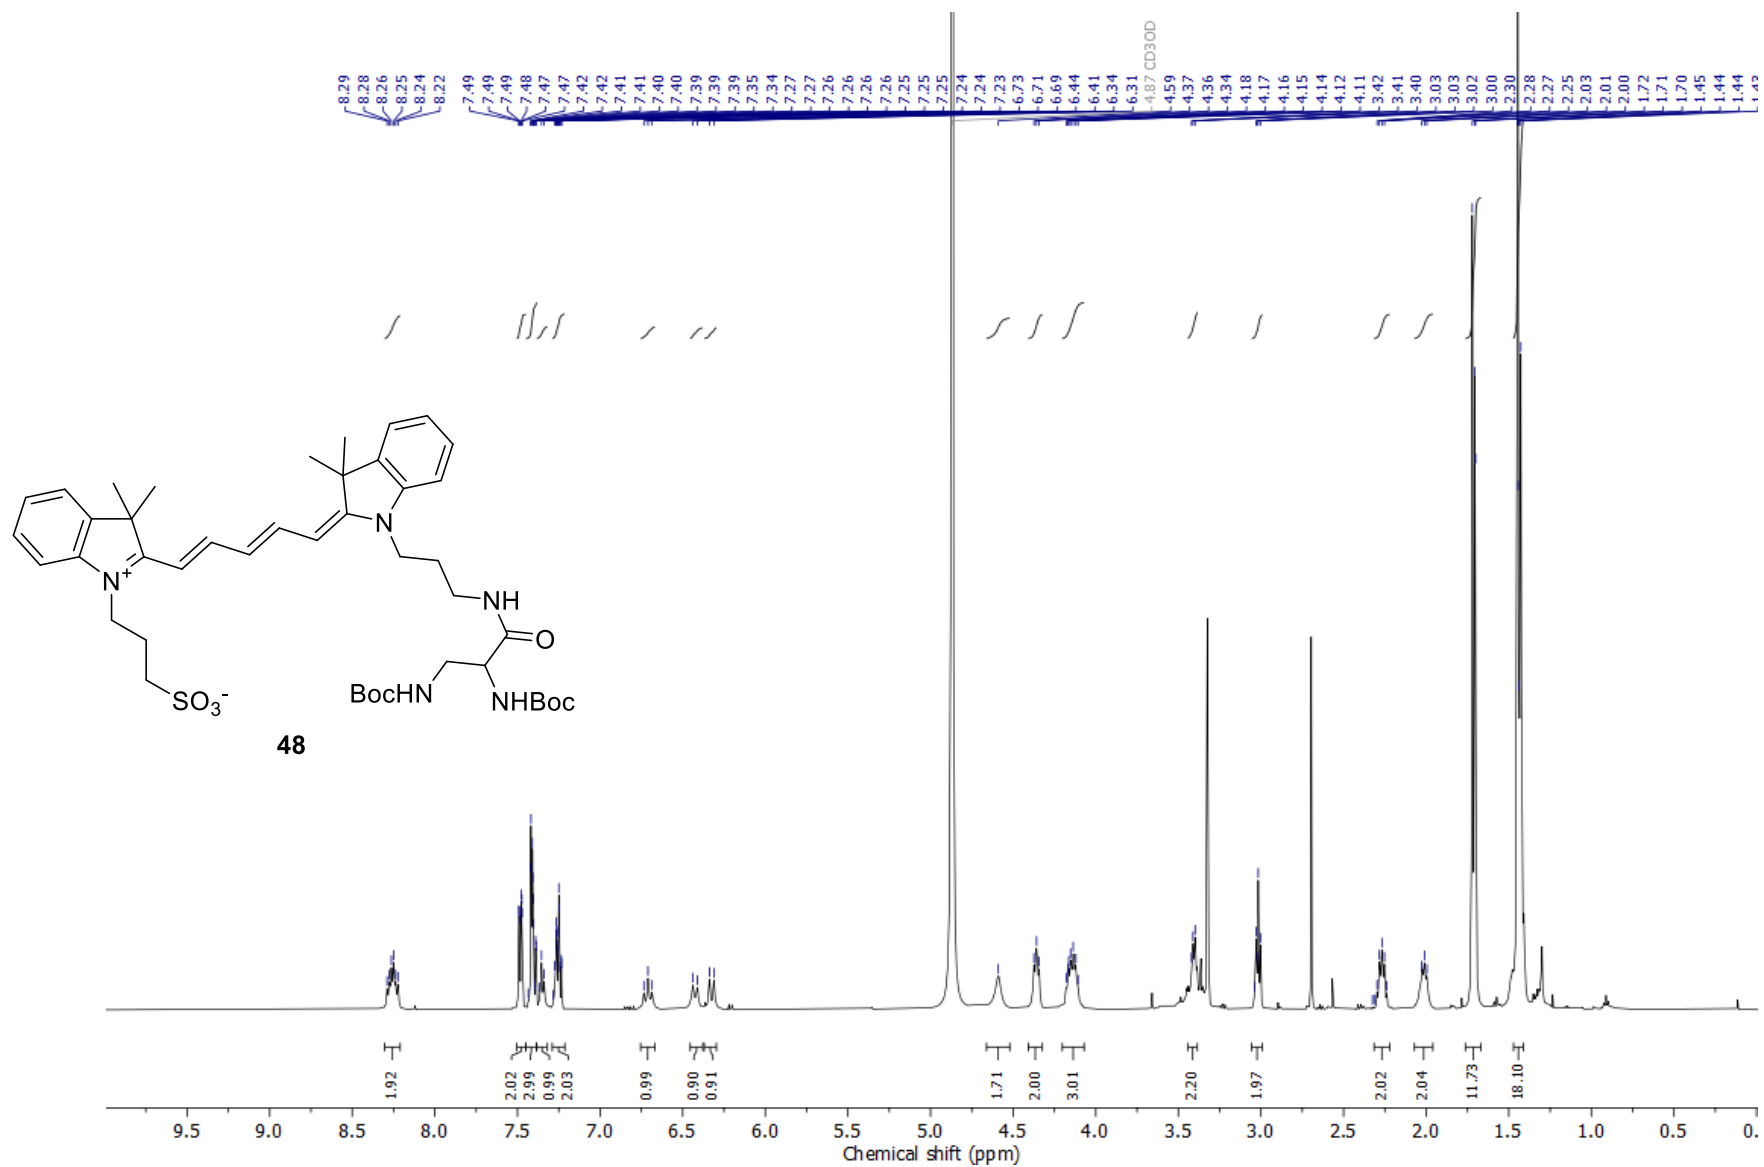

# $^{13}\text{C}$ NMR (100 MHz, MeOD)

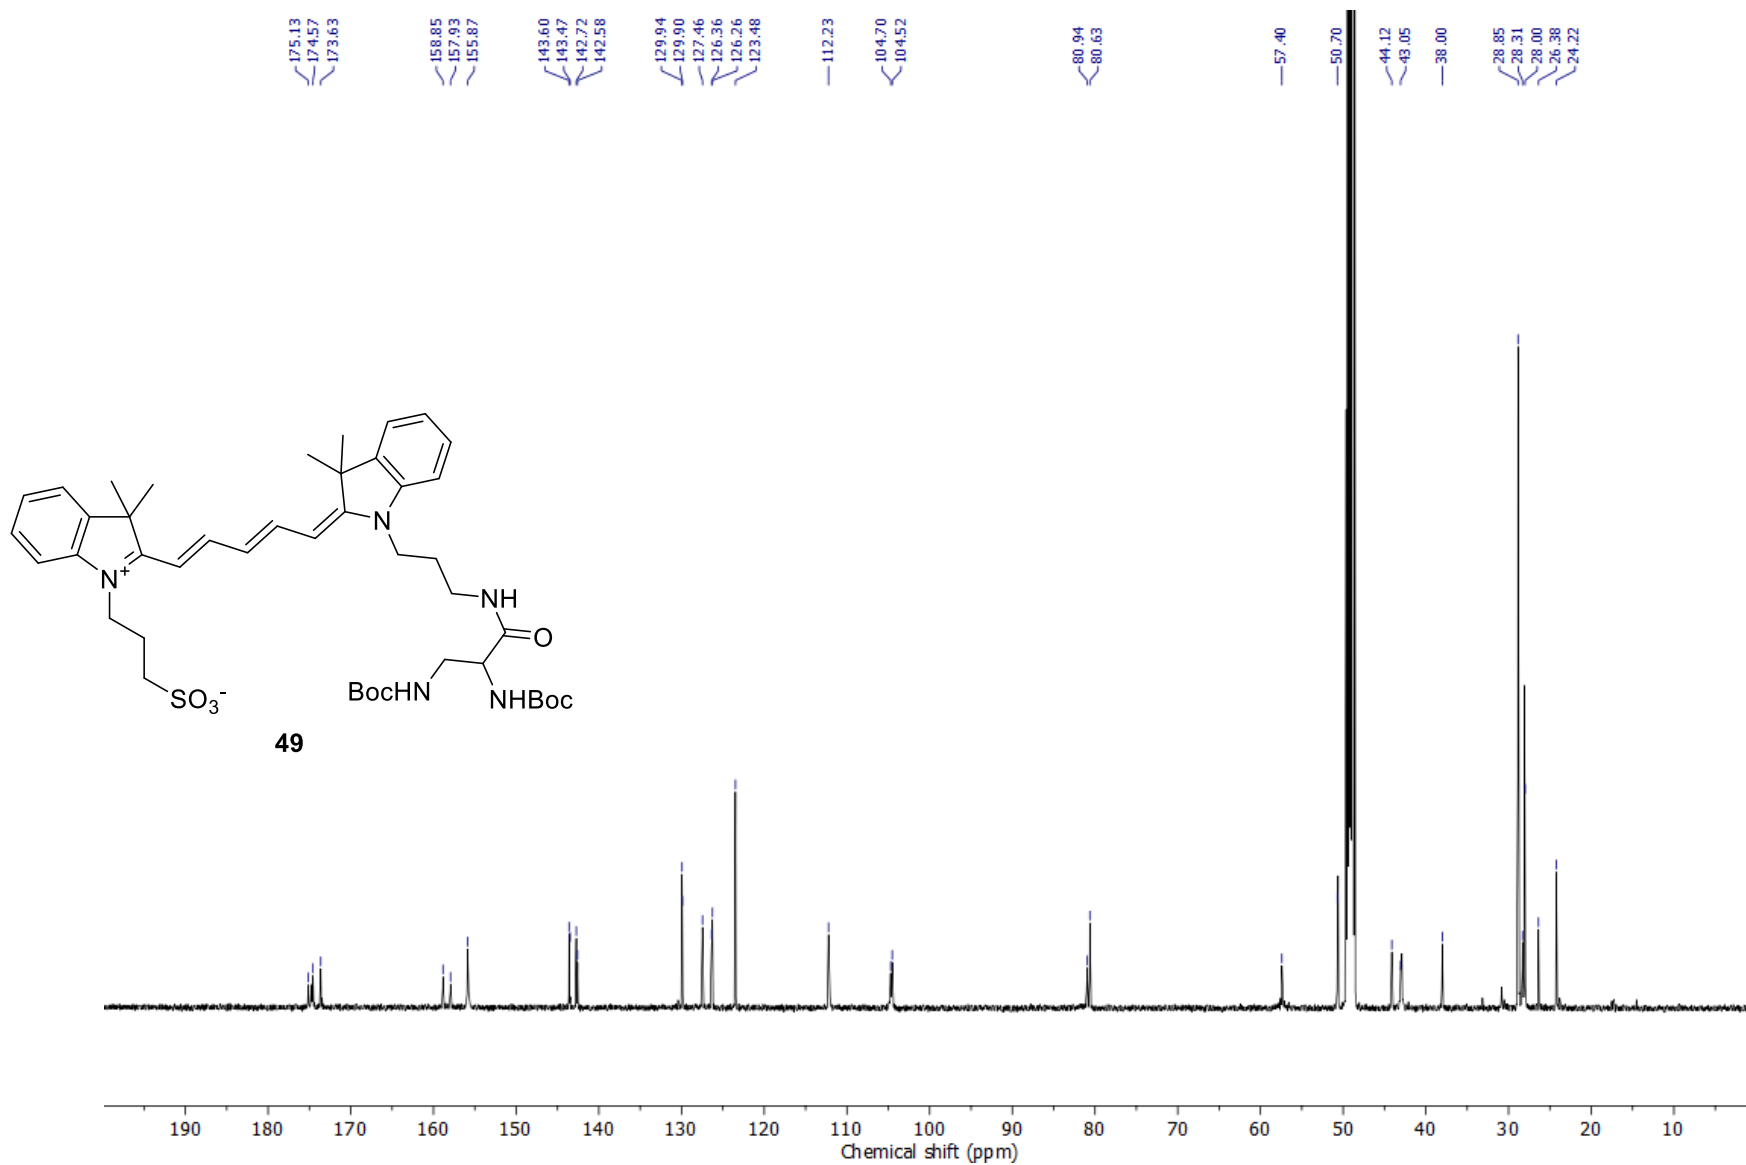

# <sup>1</sup>H NMR (400 MHz, MeOD)

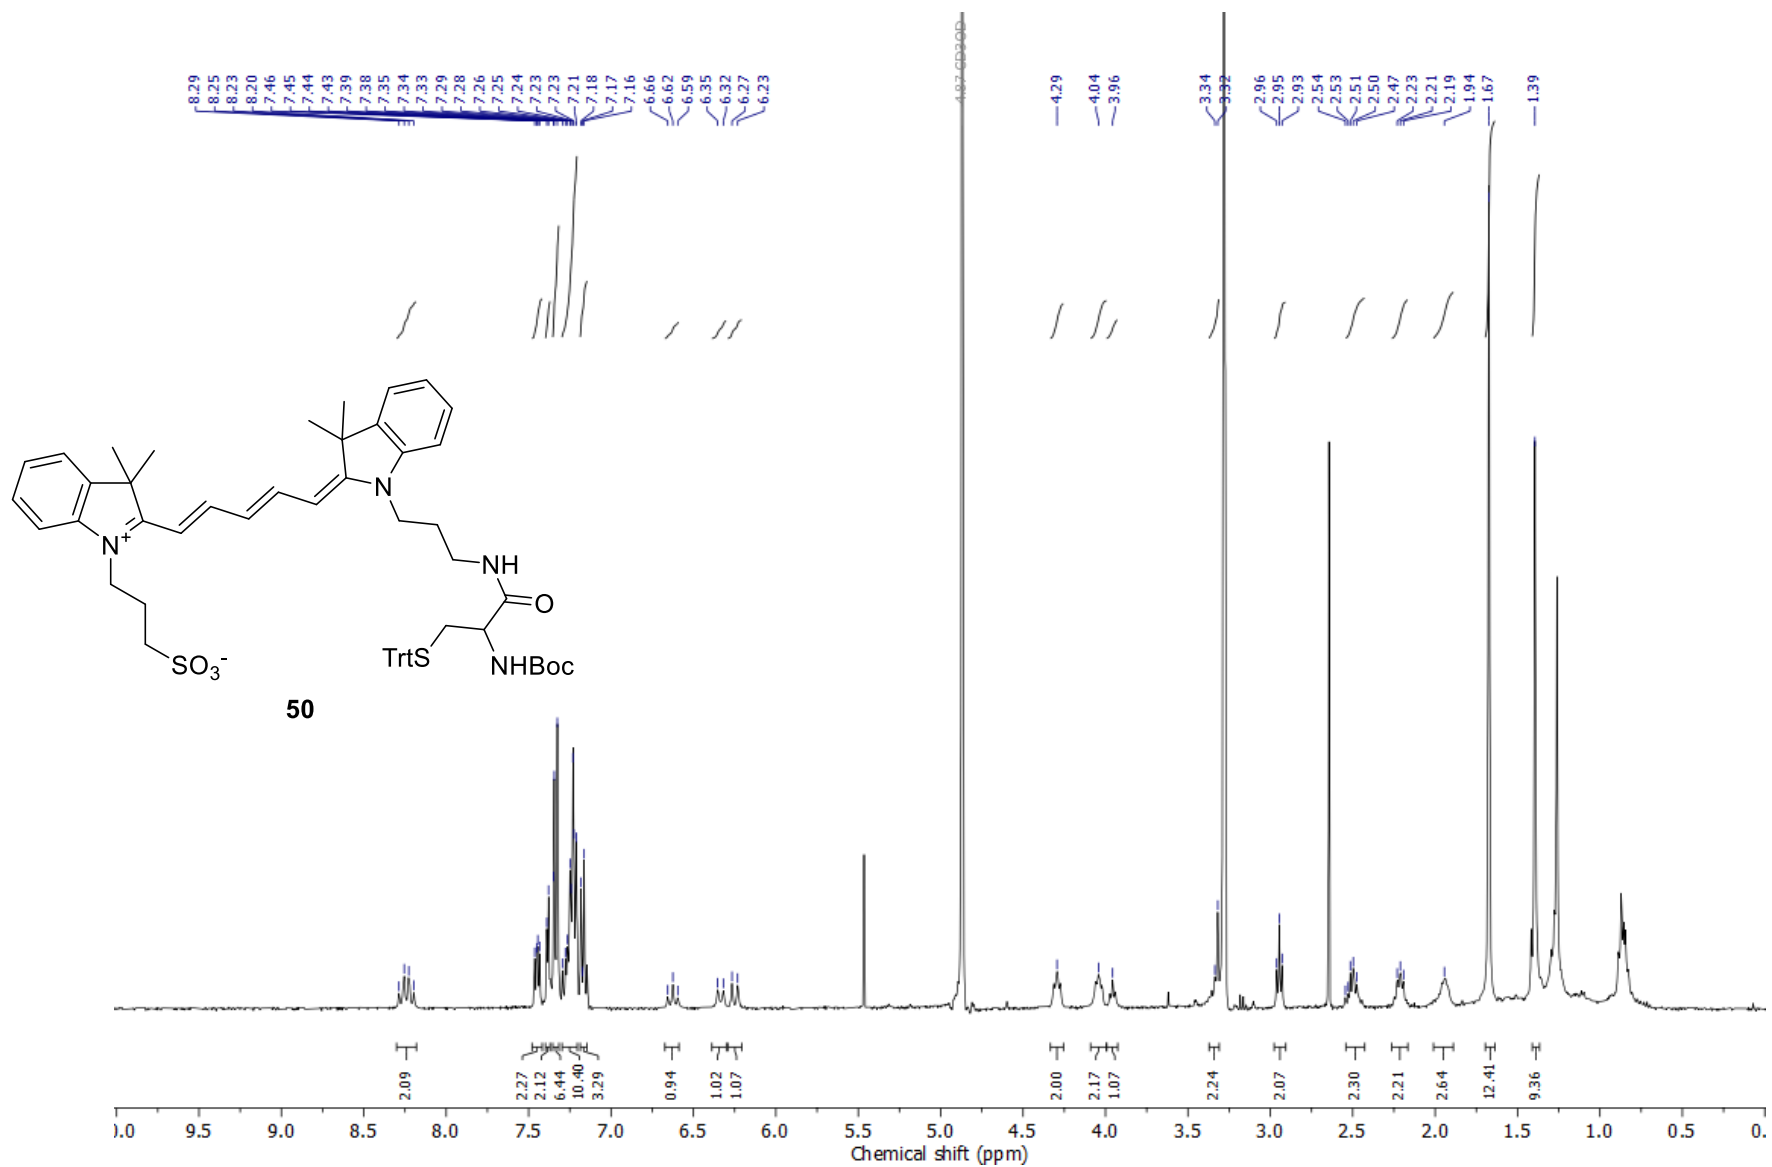

# $^1\text{H}$ NMR (400 MHz, MeOD)

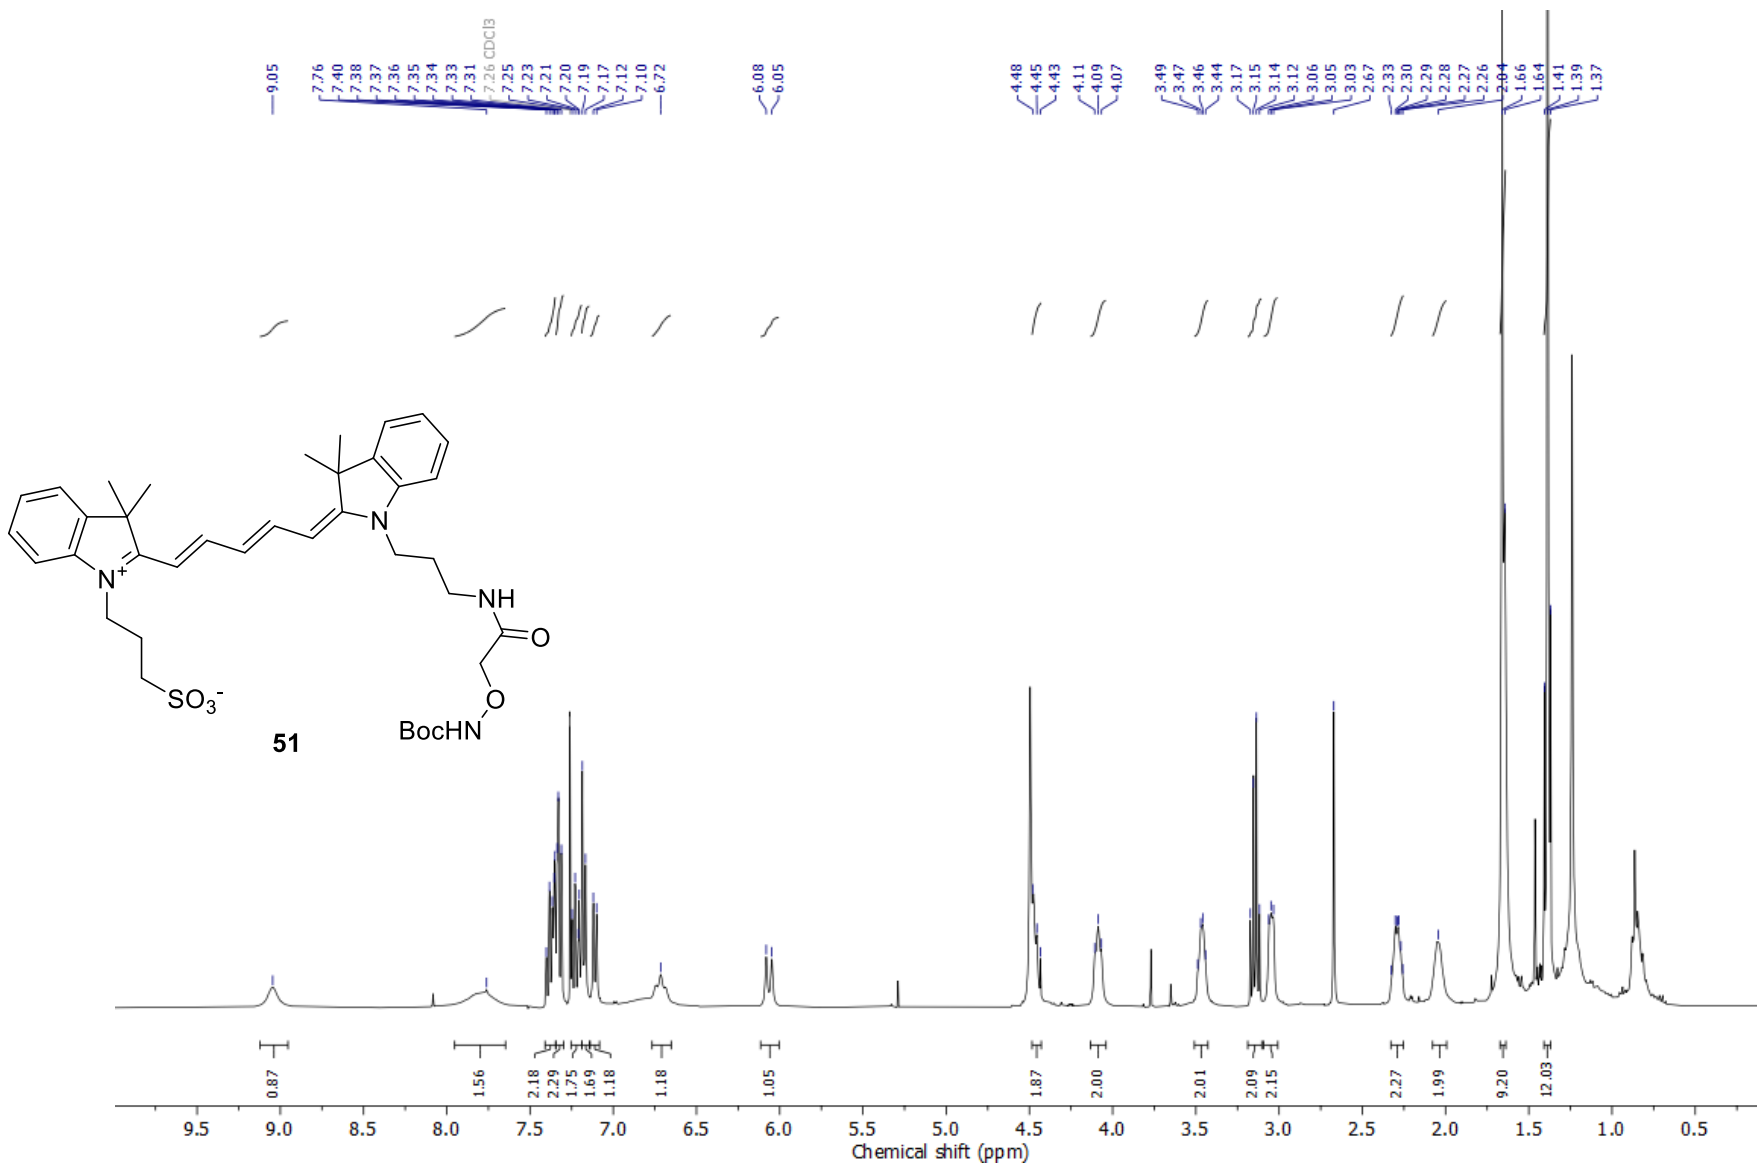

$^{13}\text{C}$  NMR (100 MHz, MeOD)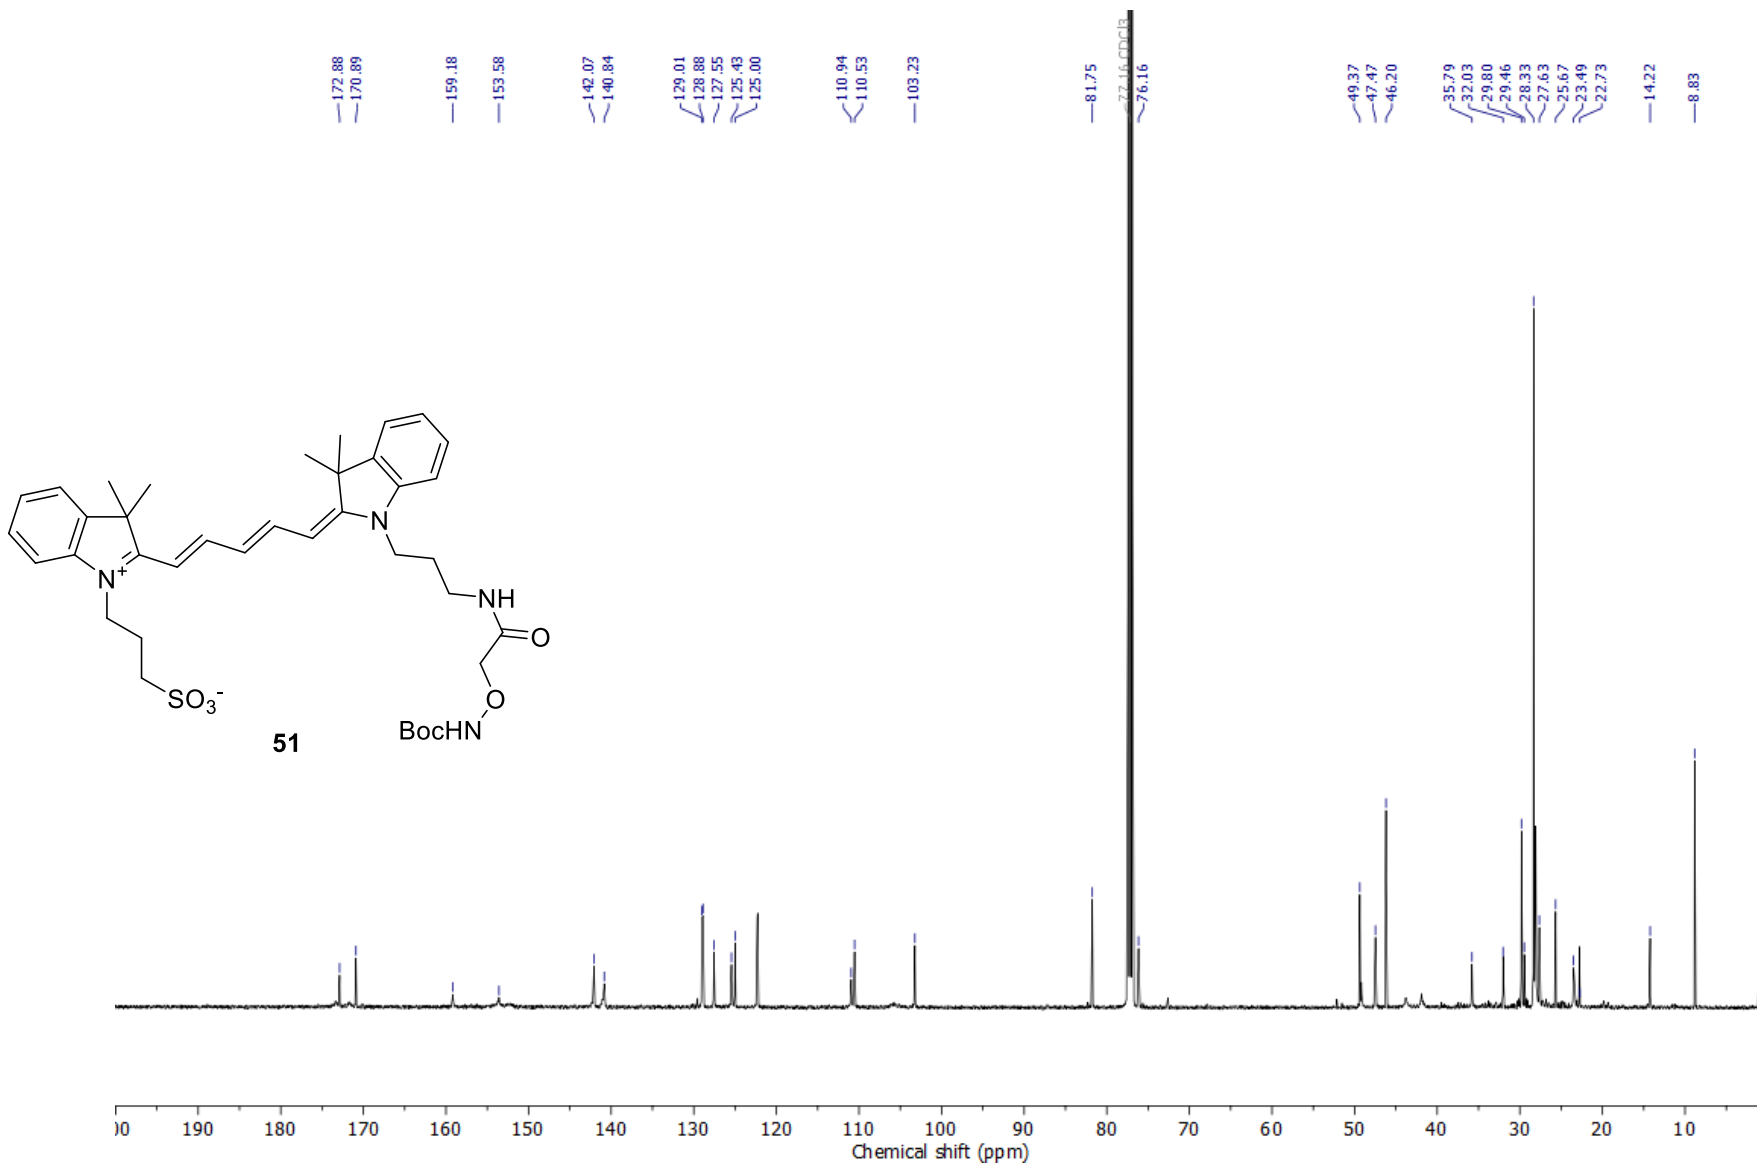

<sup>1</sup>H NMR (400 MHz, MeOD)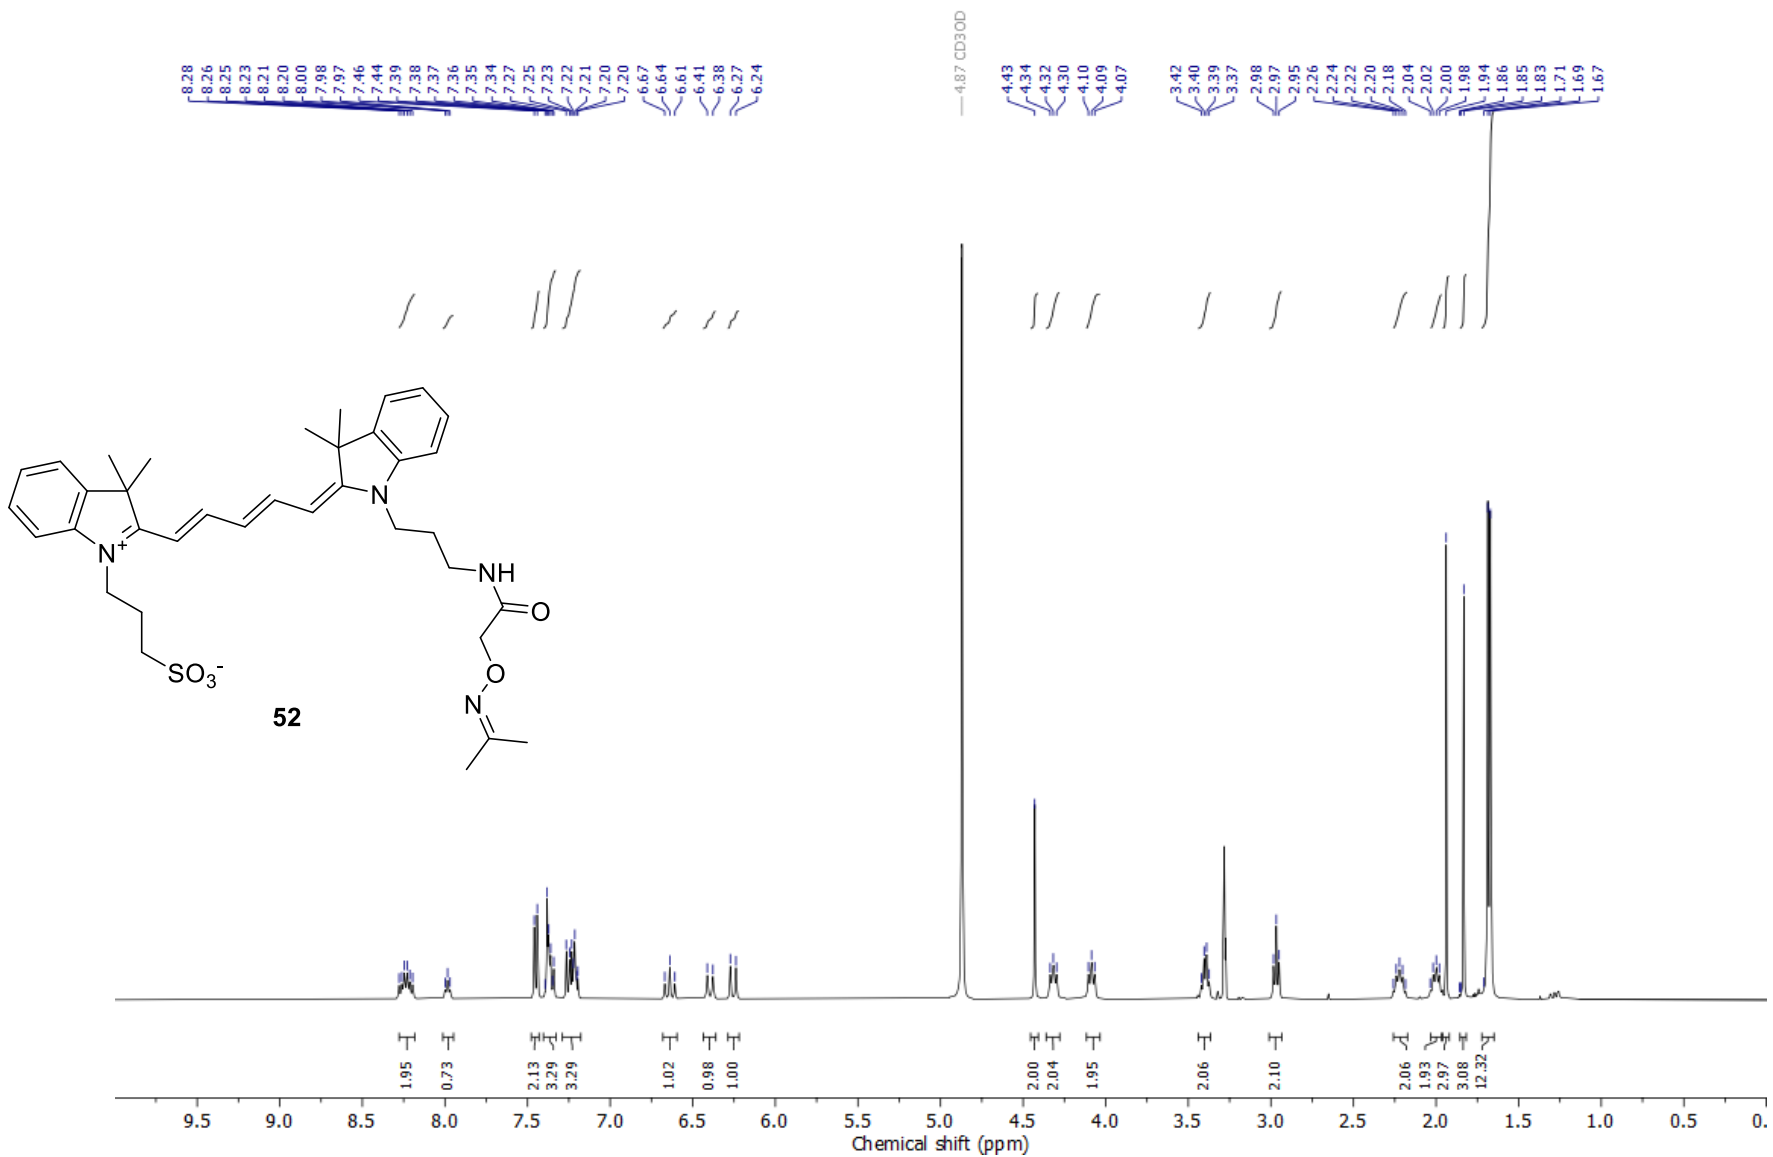

$^{13}\text{C}$  NMR (100 MHz, MeOD)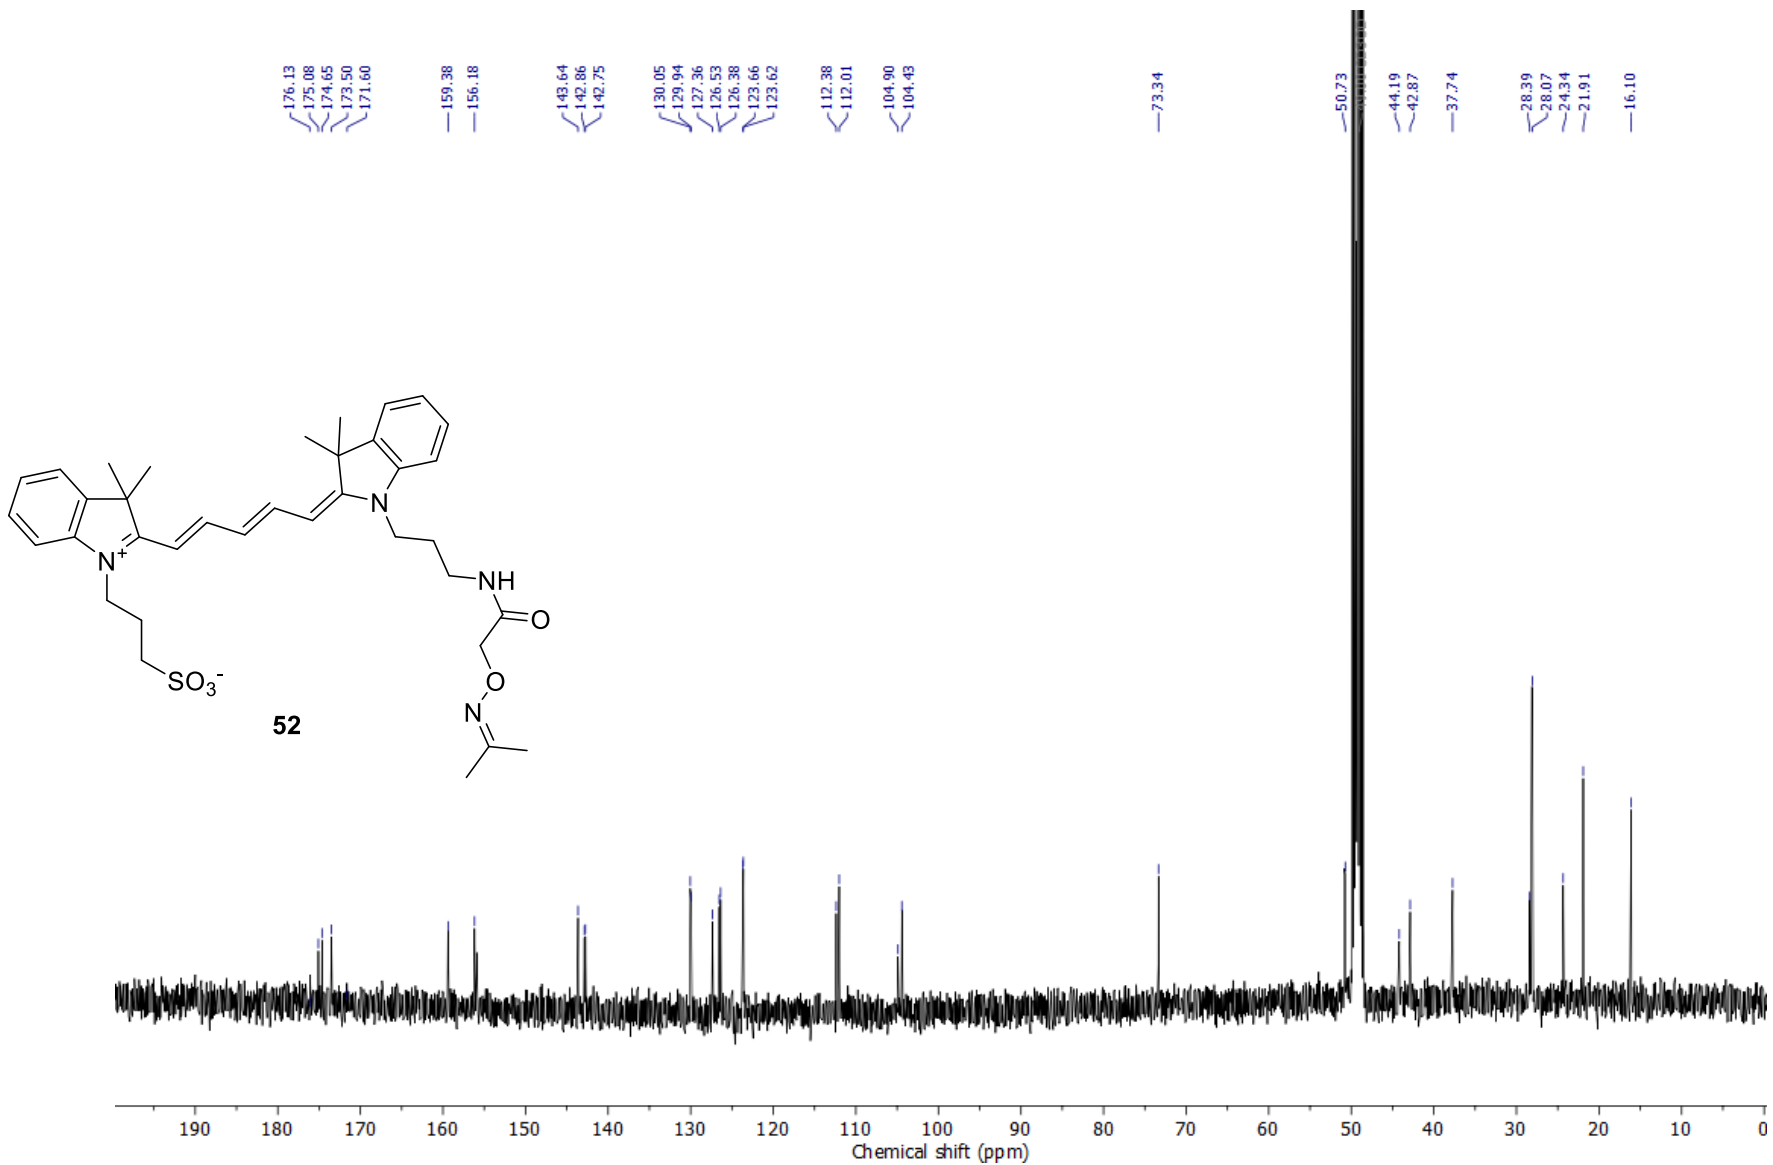

# $^1\text{H}$ NMR (400 MHz, MeOD)

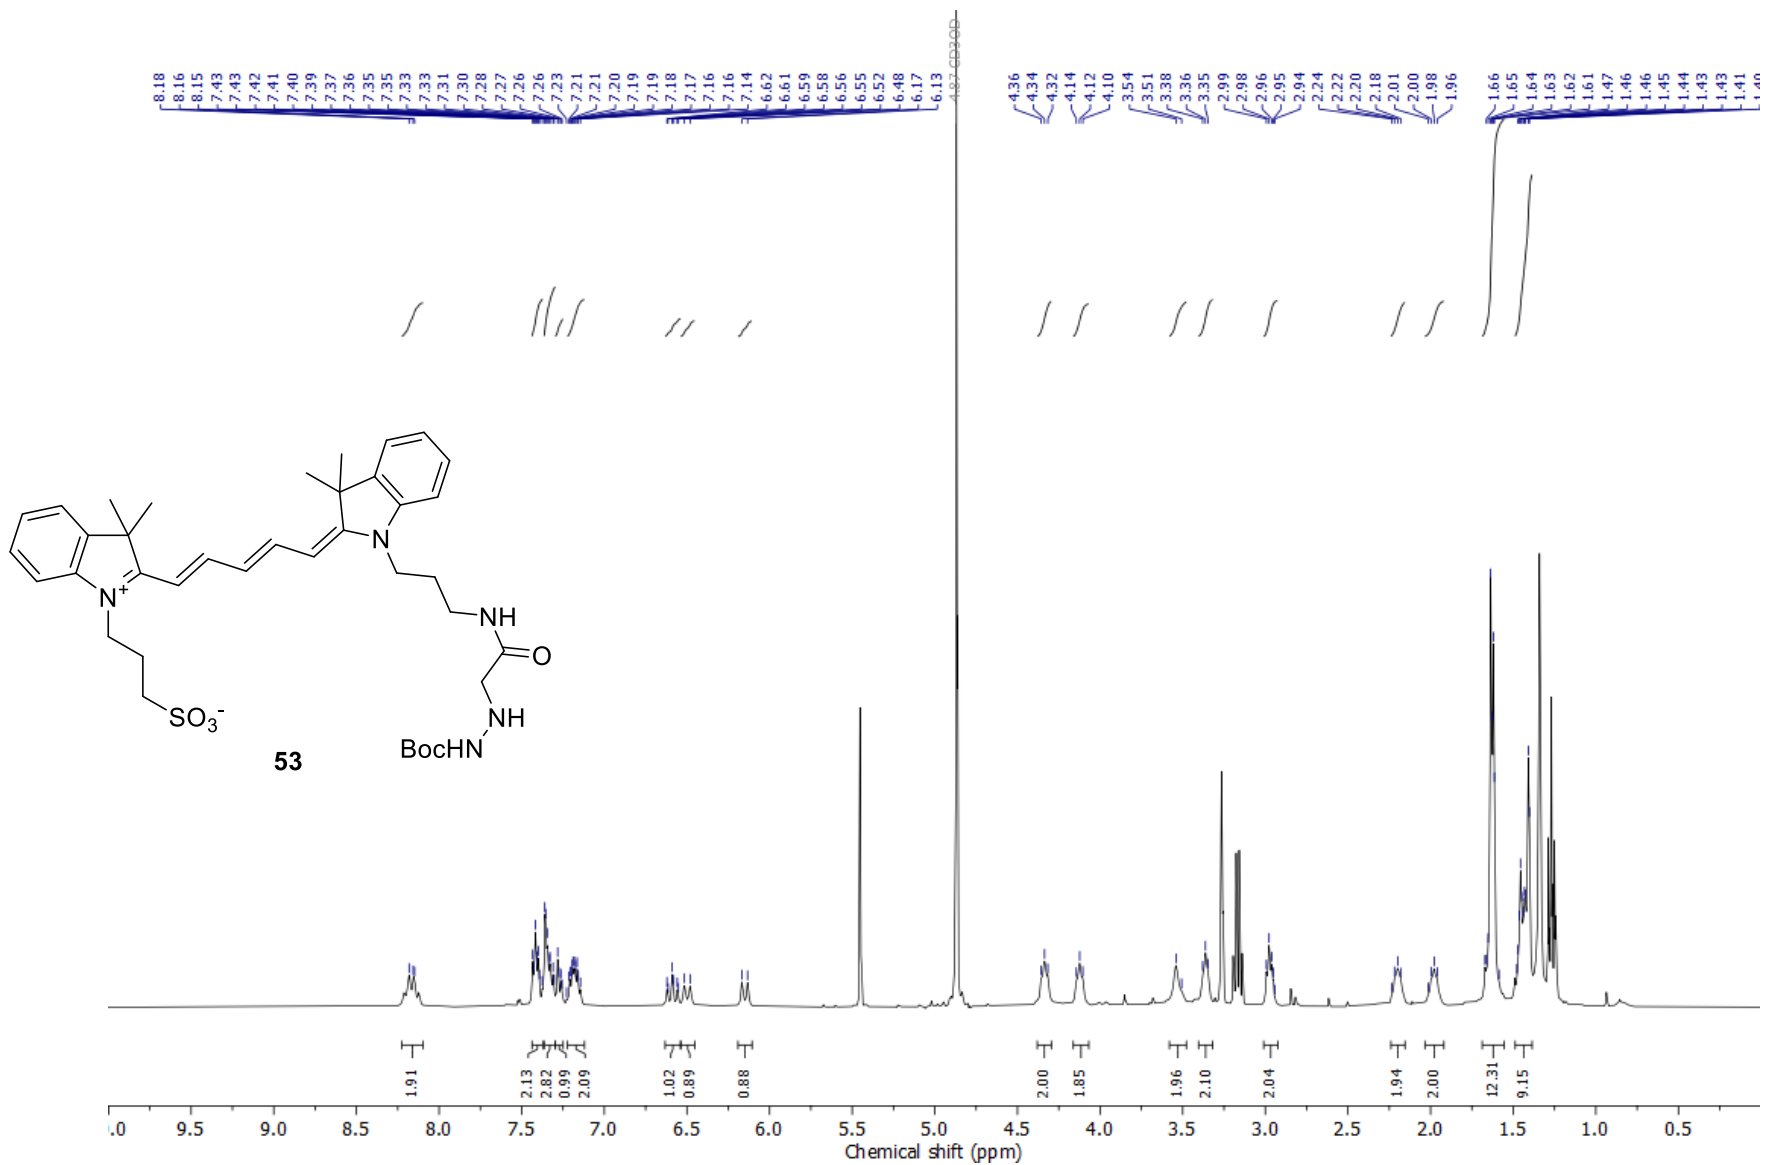

# $^{13}\text{C}$ NMR (100 MHz, MeOD)

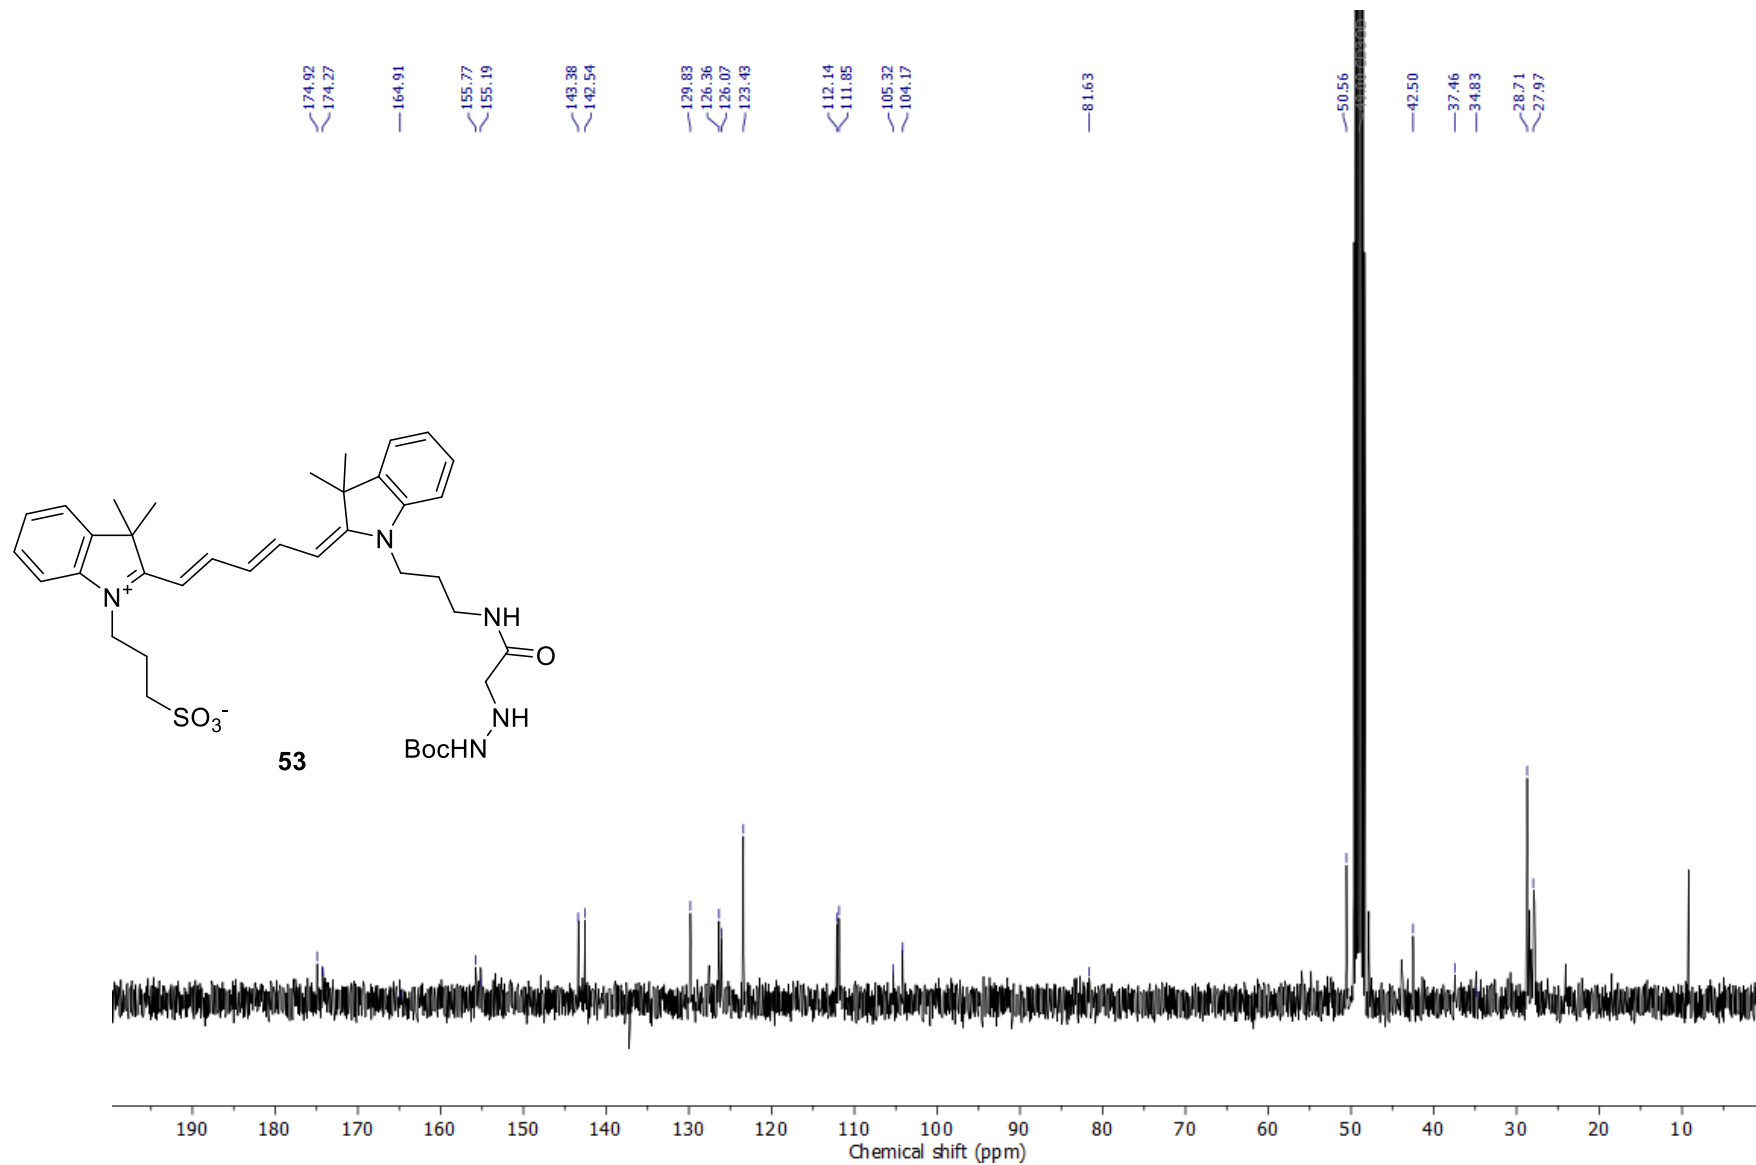

# $^1\text{H}$ NMR (400 MHz, $\text{CDCl}_3$ )

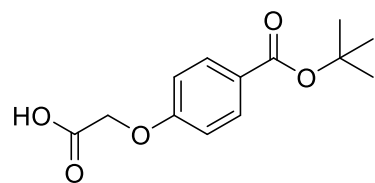

**54**

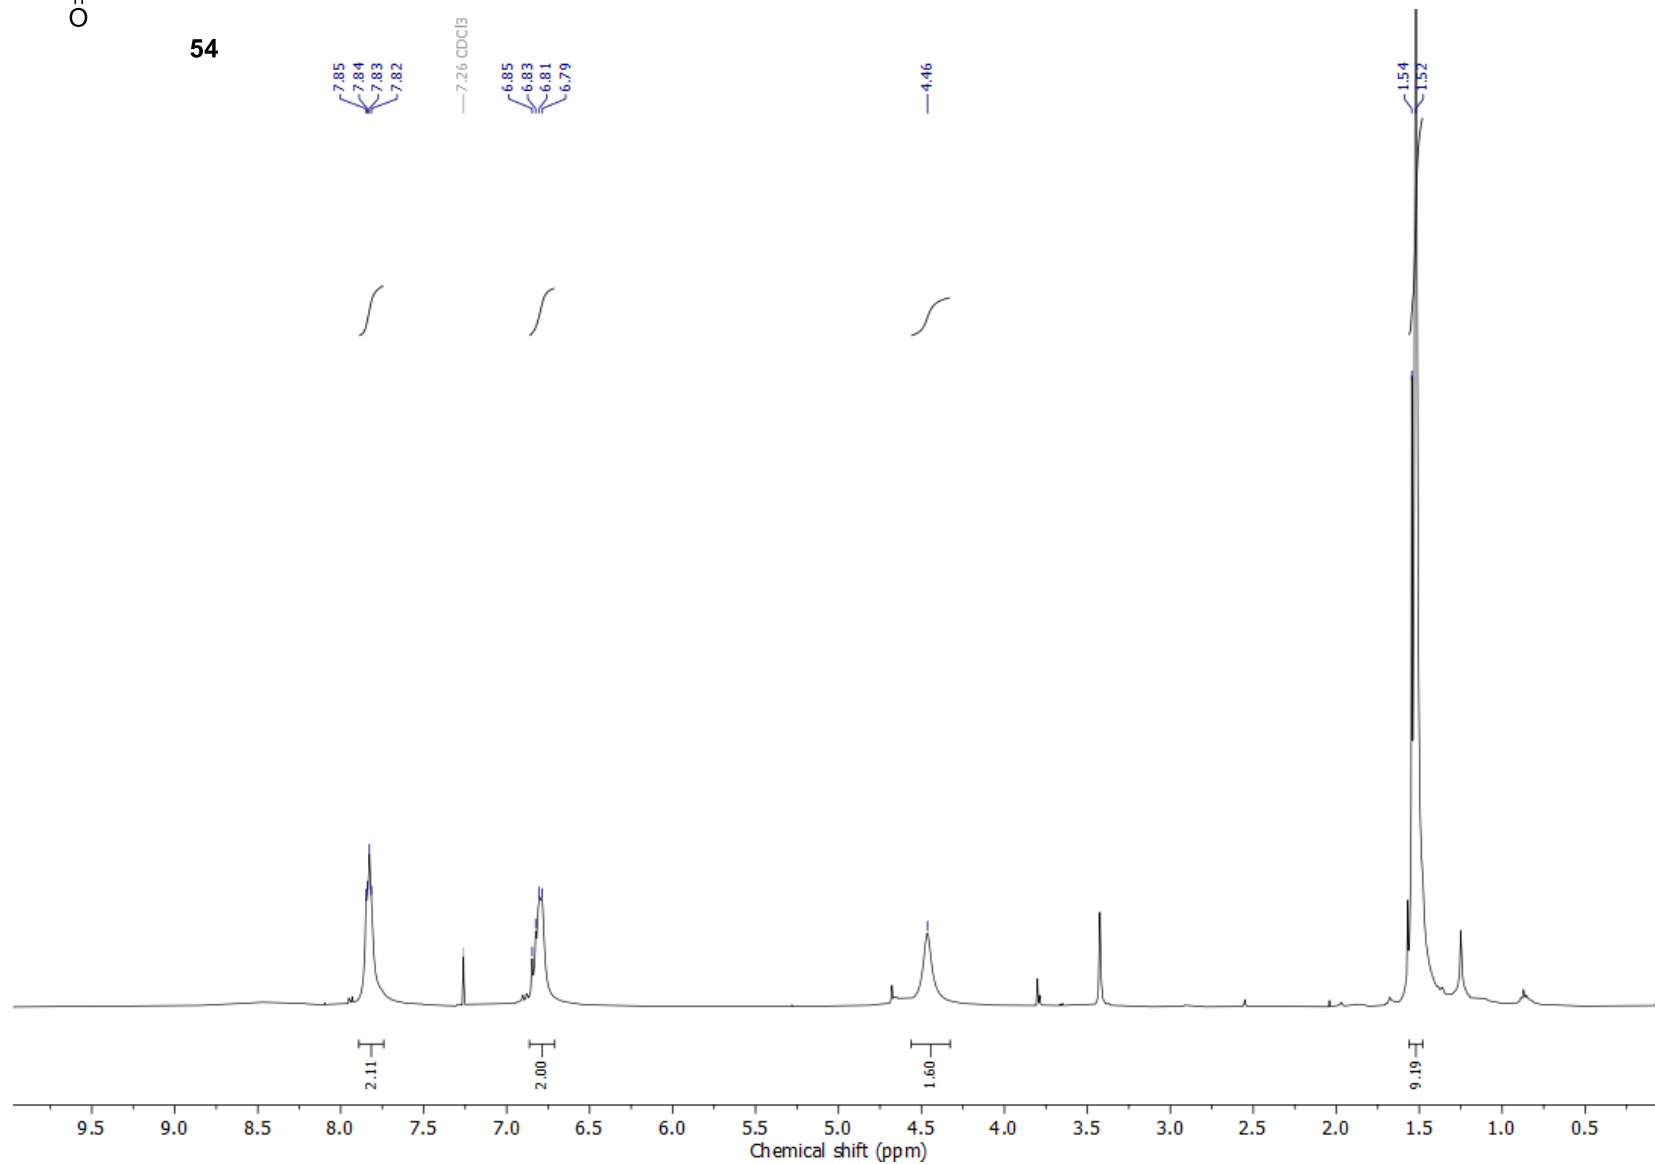

# $^{13}\text{C}$ NMR (100 MHz, $\text{CDCl}_3$ )

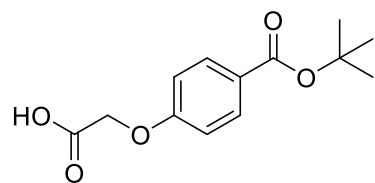

**54**

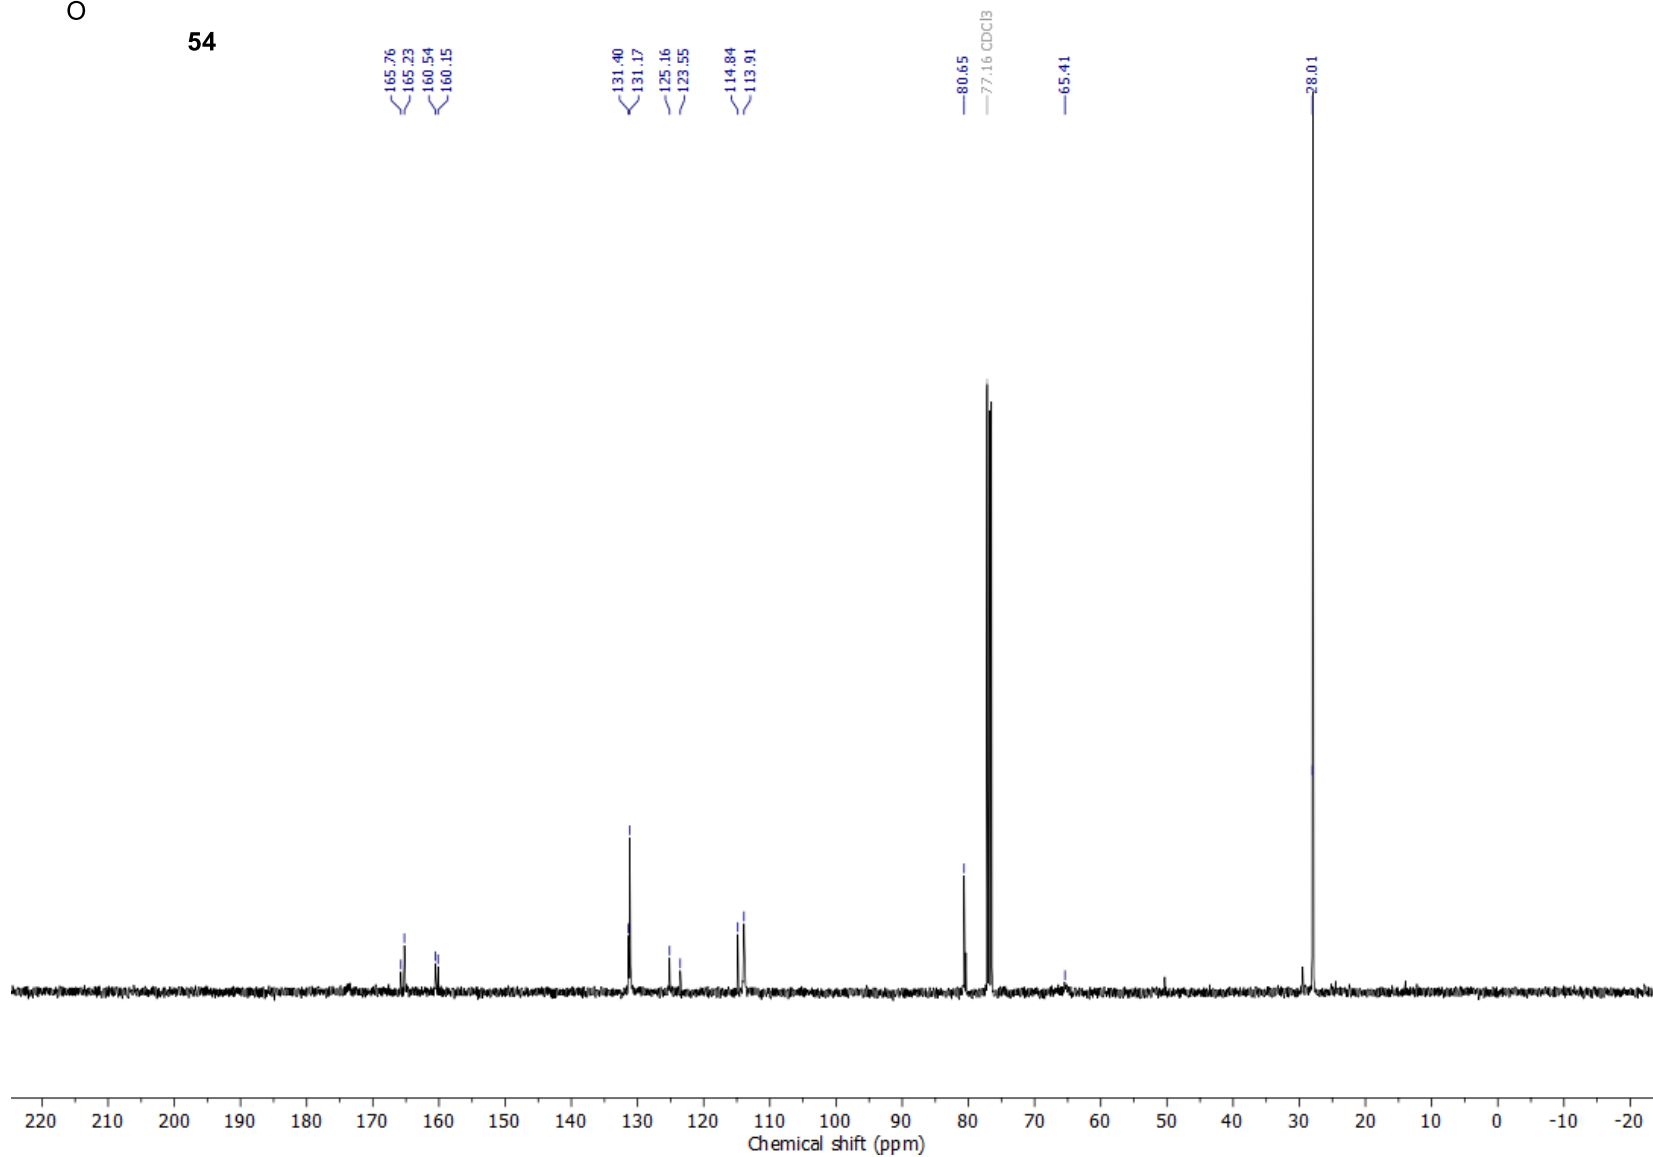

# <sup>1</sup>H NMR (600 MHz, MeOD)

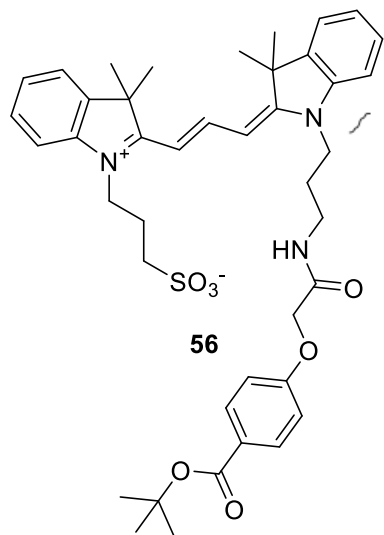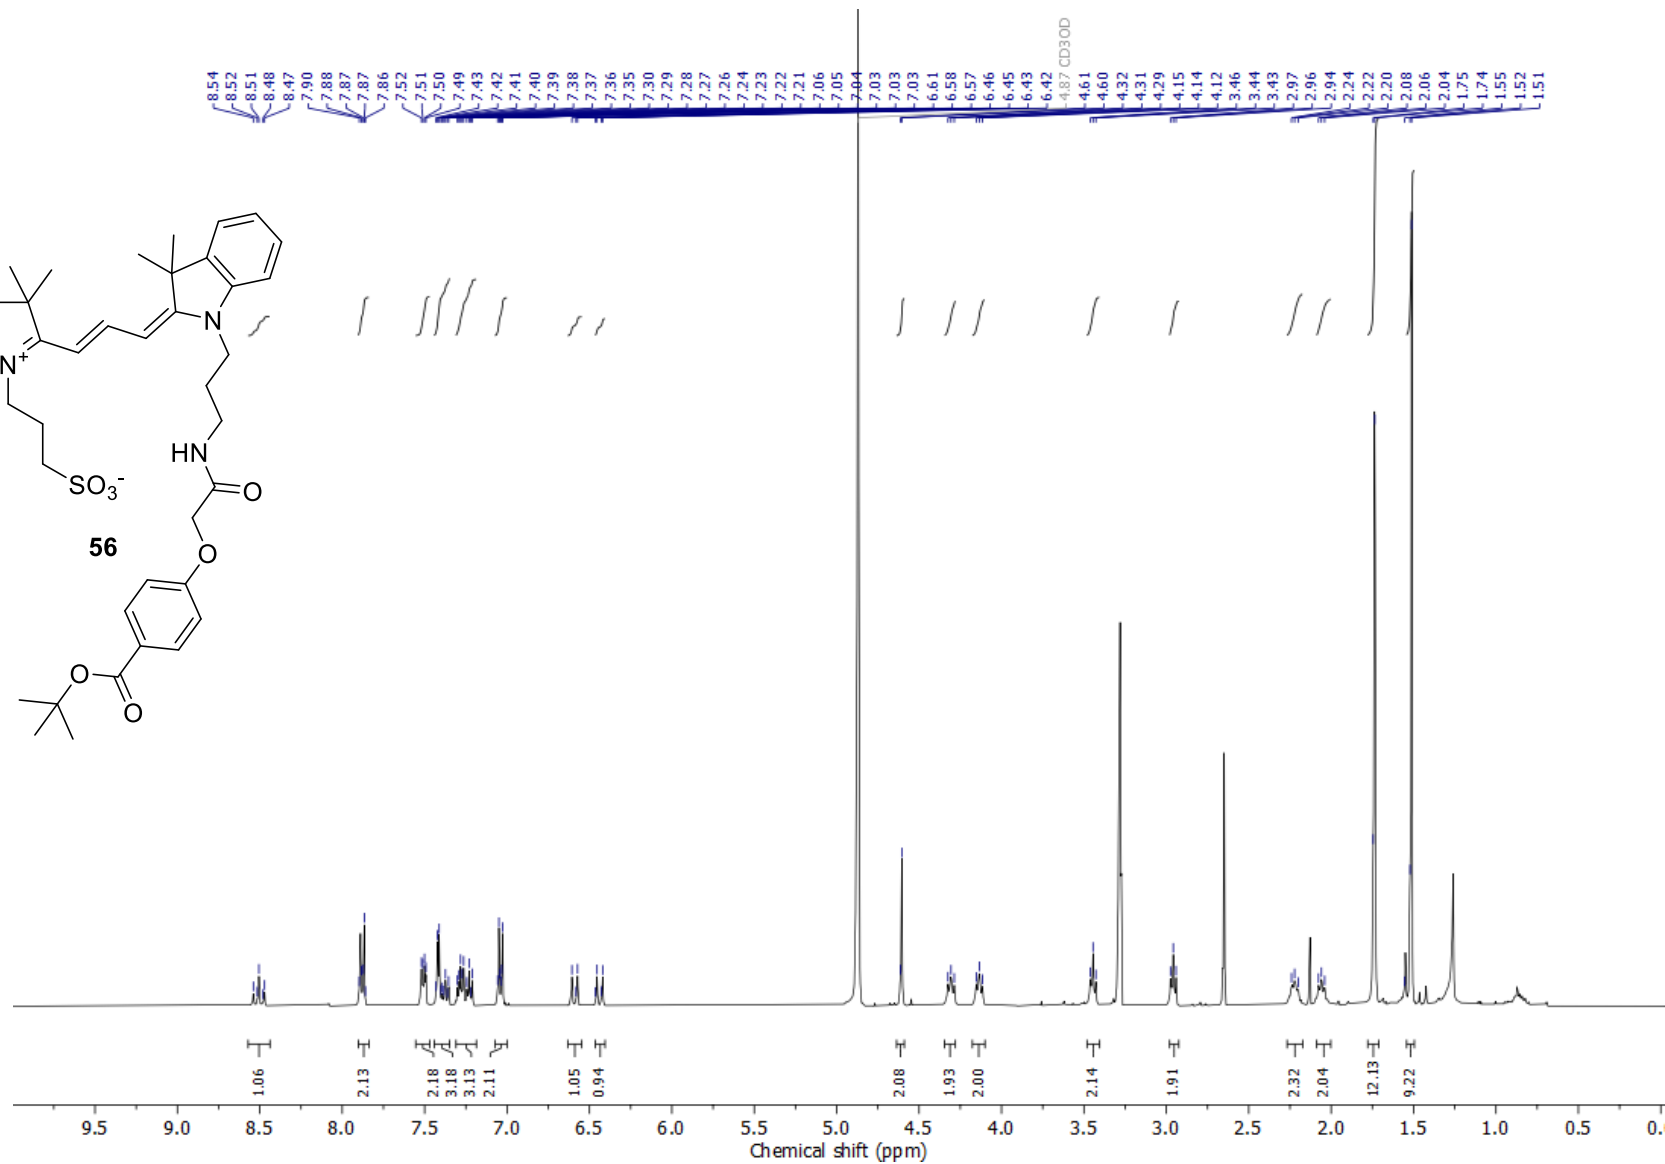

# $^{13}\text{C}$ NMR(600 MHz, MeOD)

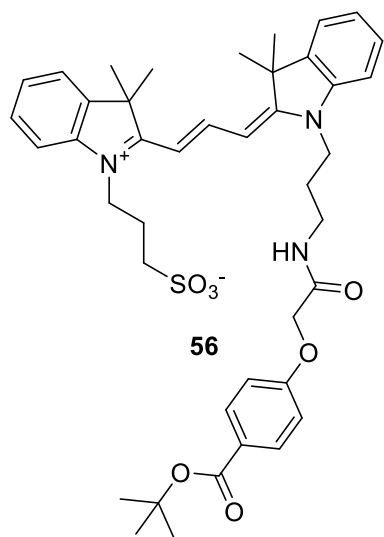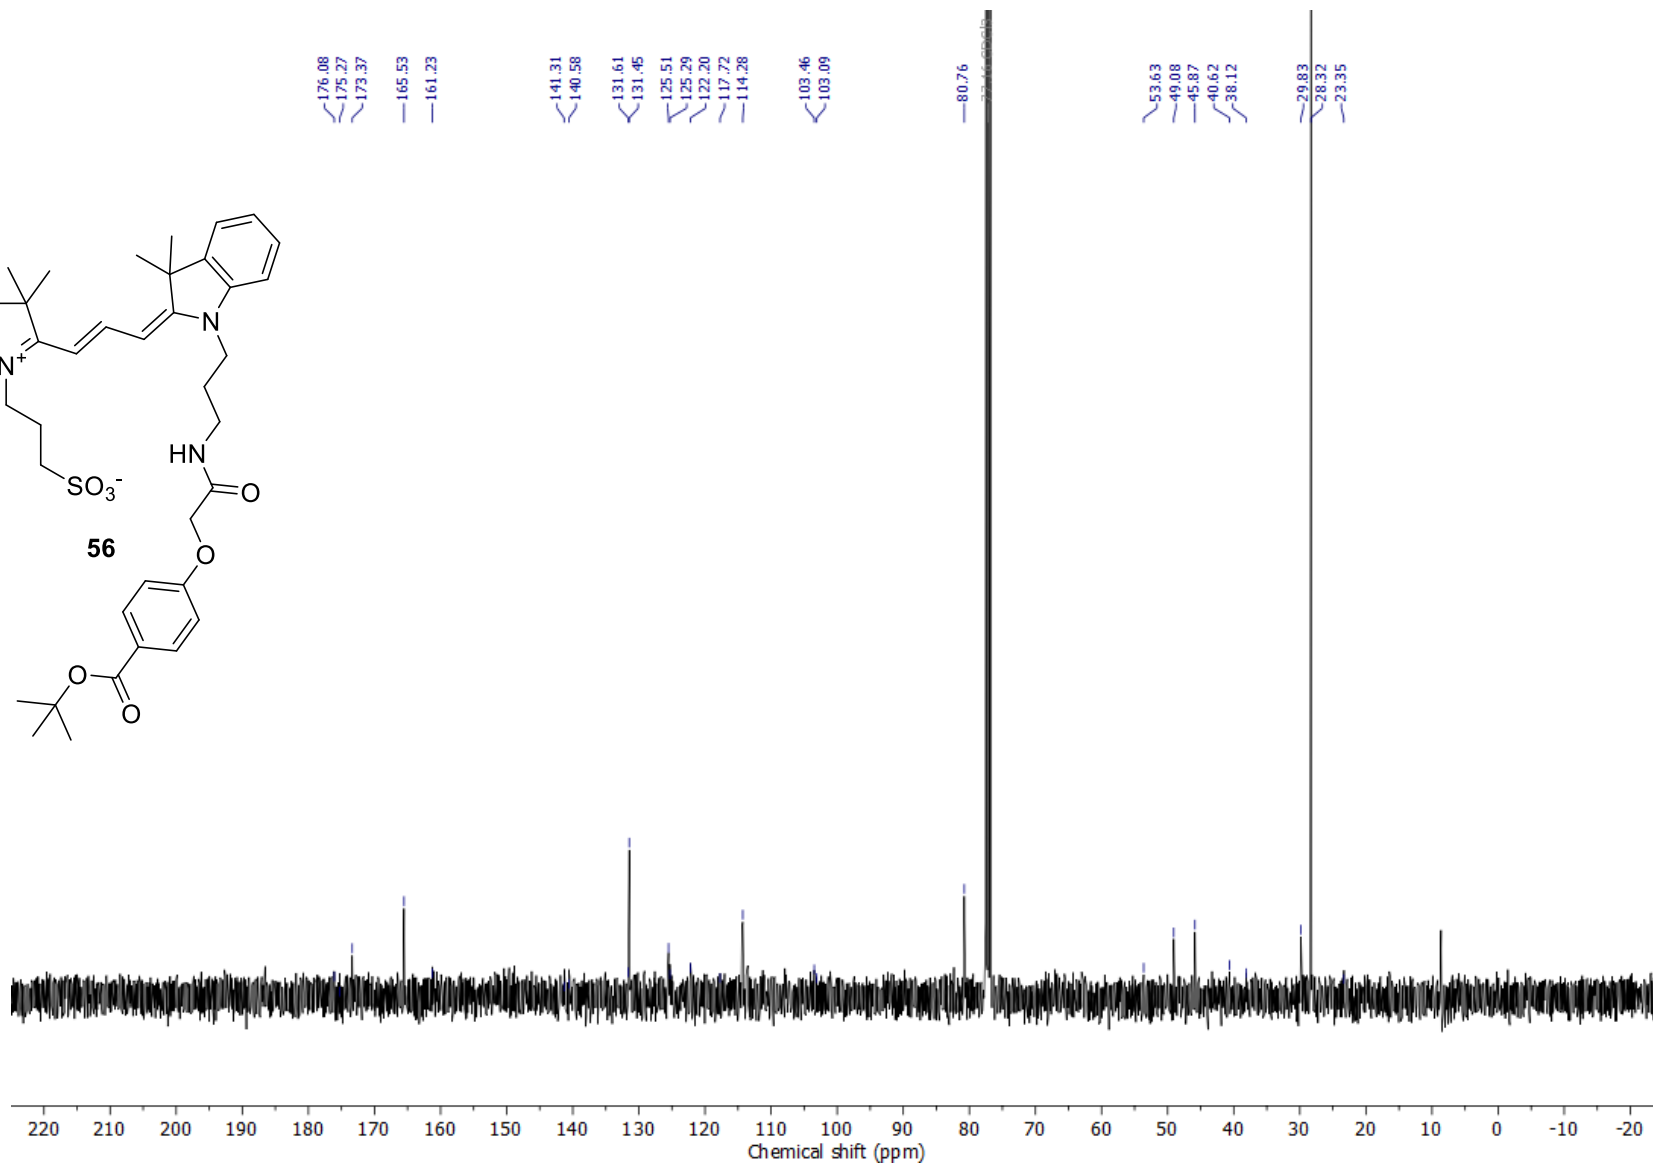

# $^1\text{H}$ NMR (600 MHz, MeOD)

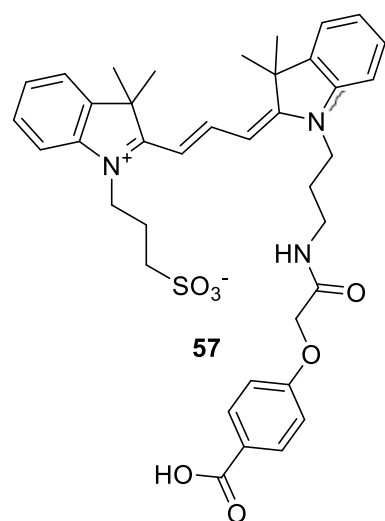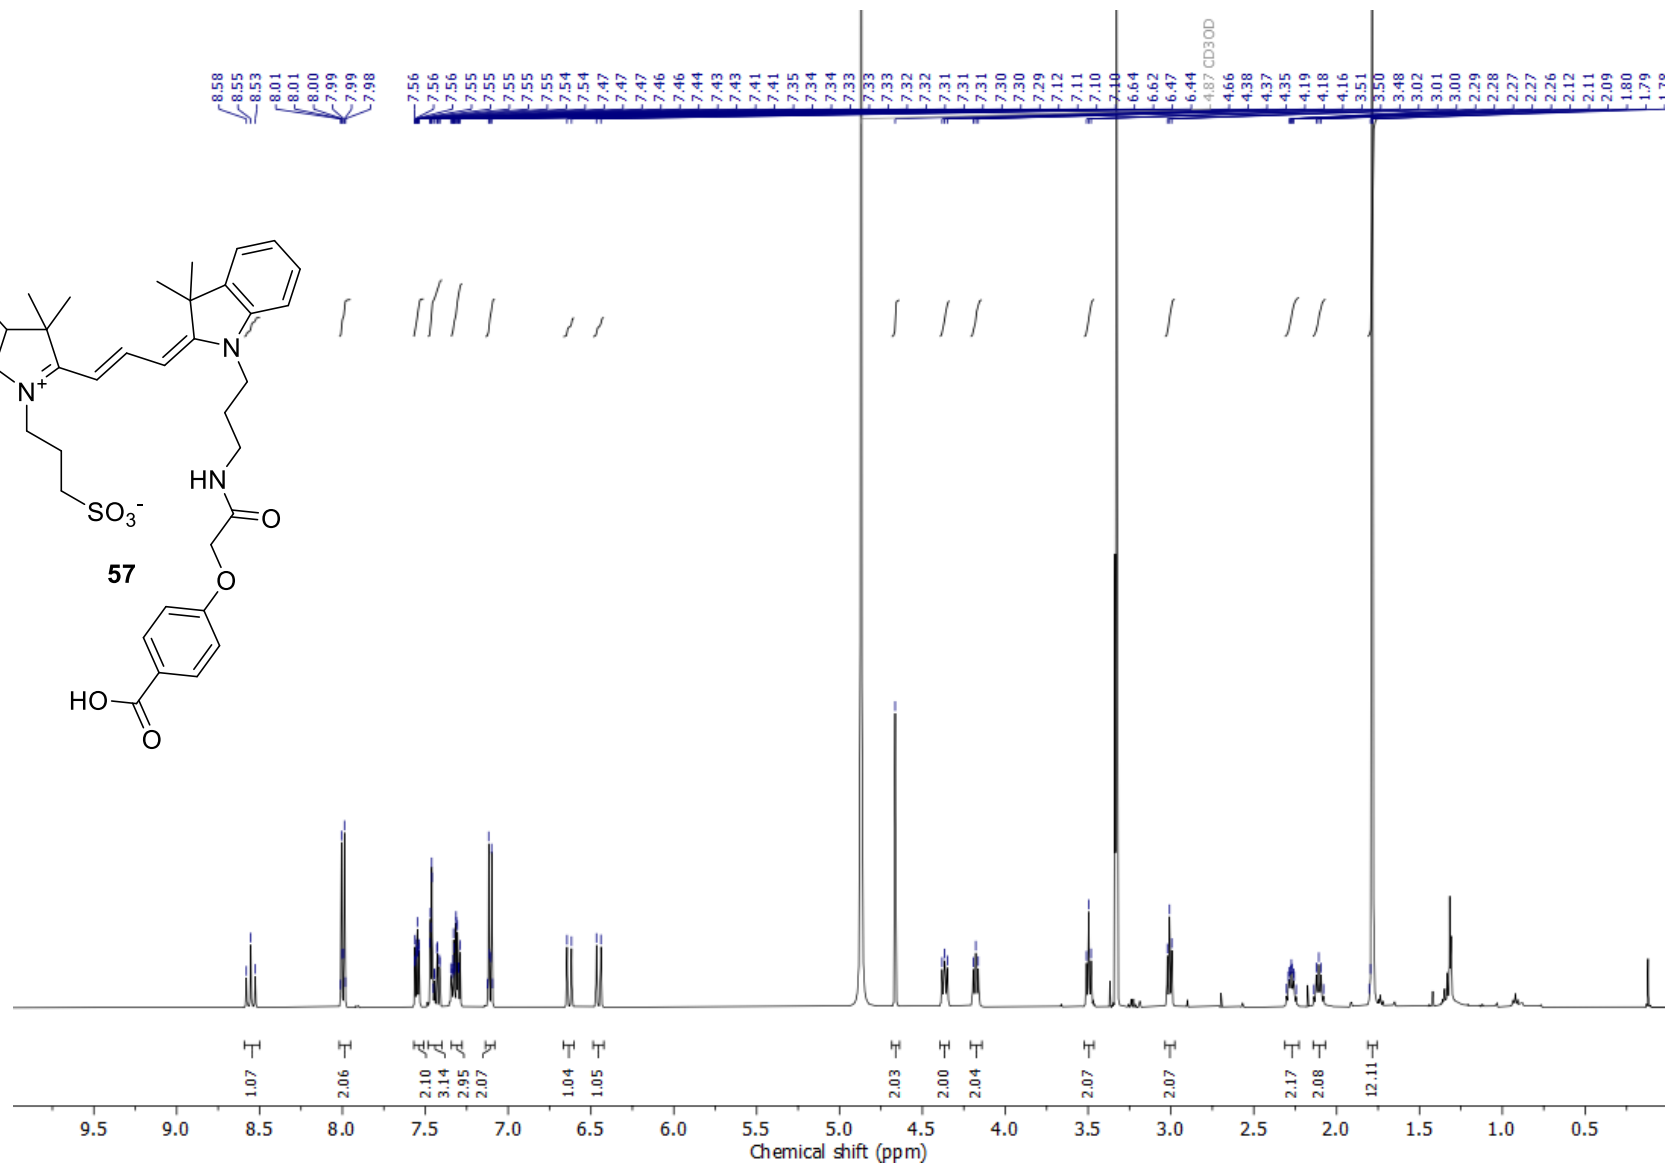

# $^{13}\text{C}$ NMR(600 MHz, MeOD)

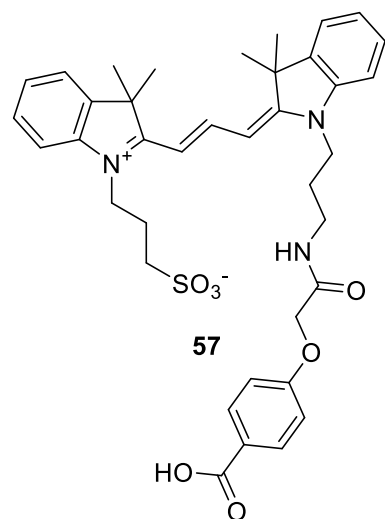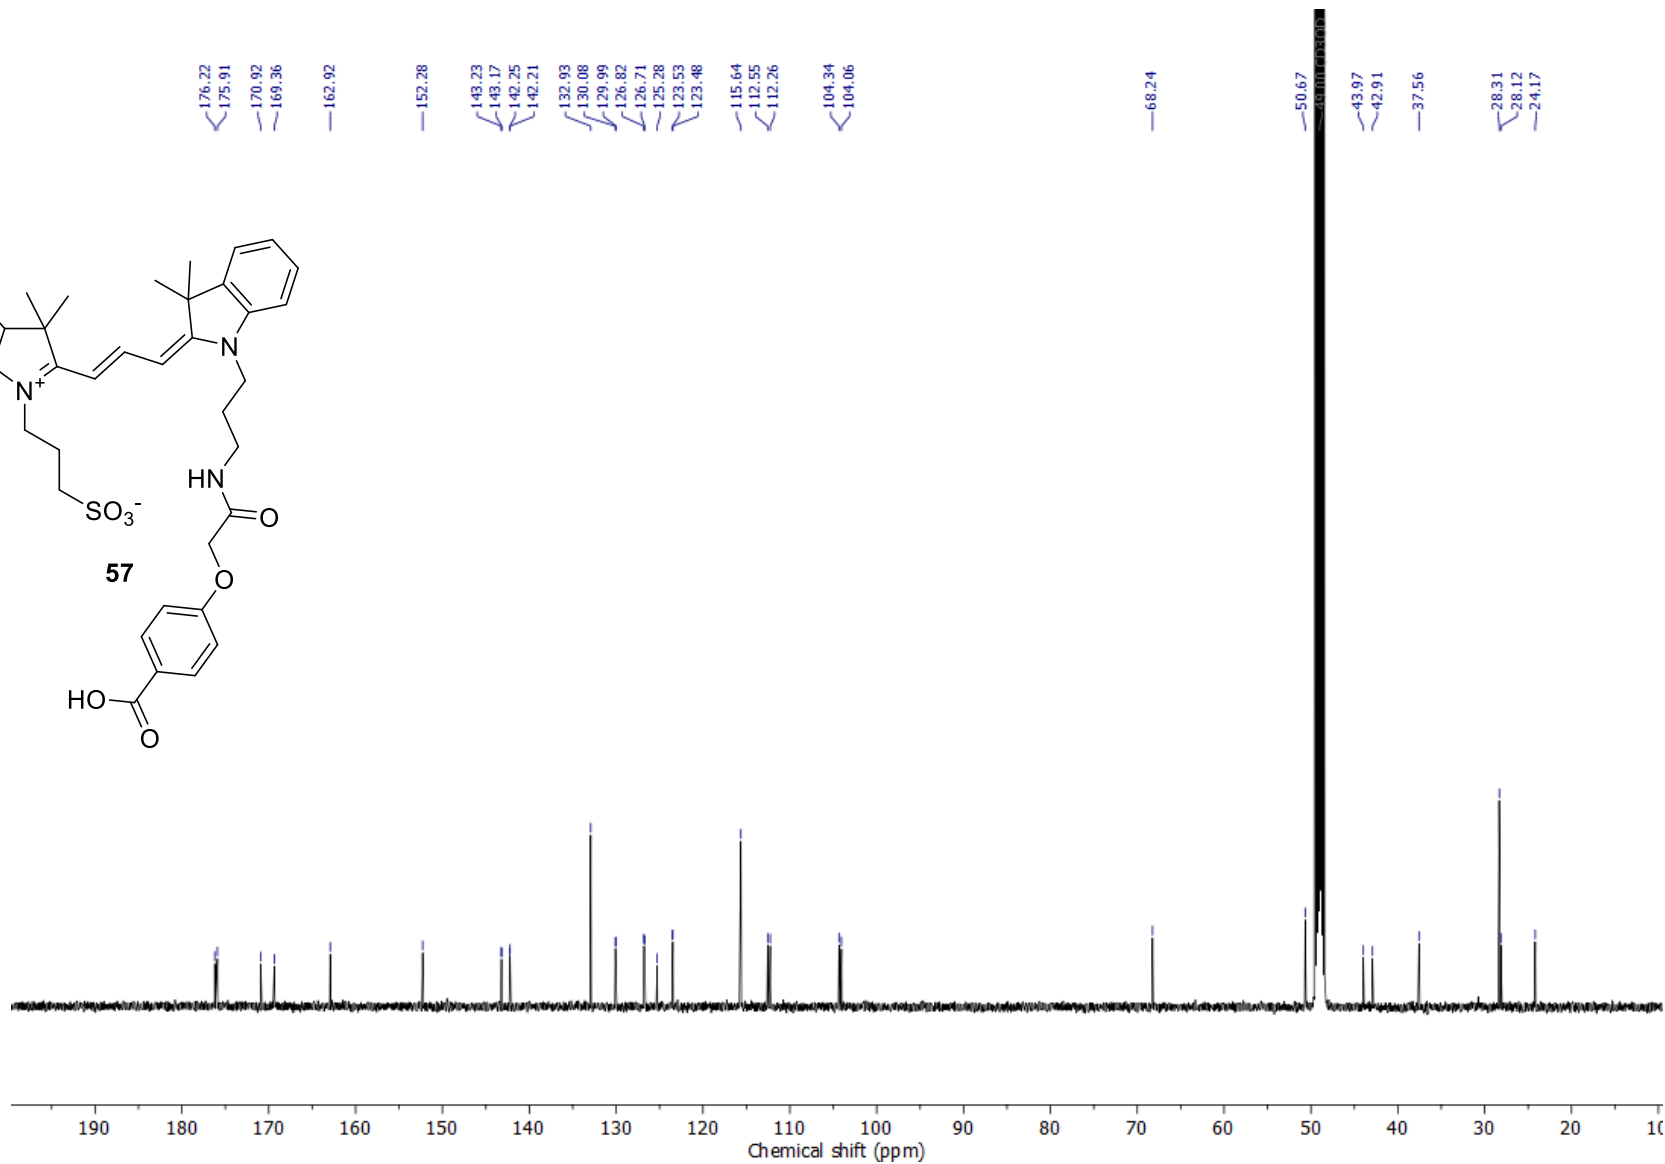

# <sup>1</sup>H NMR (500 MHz, MeOD)

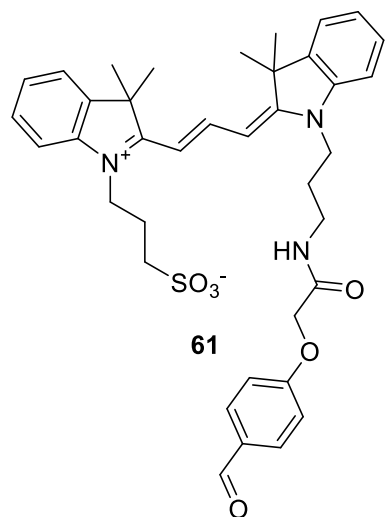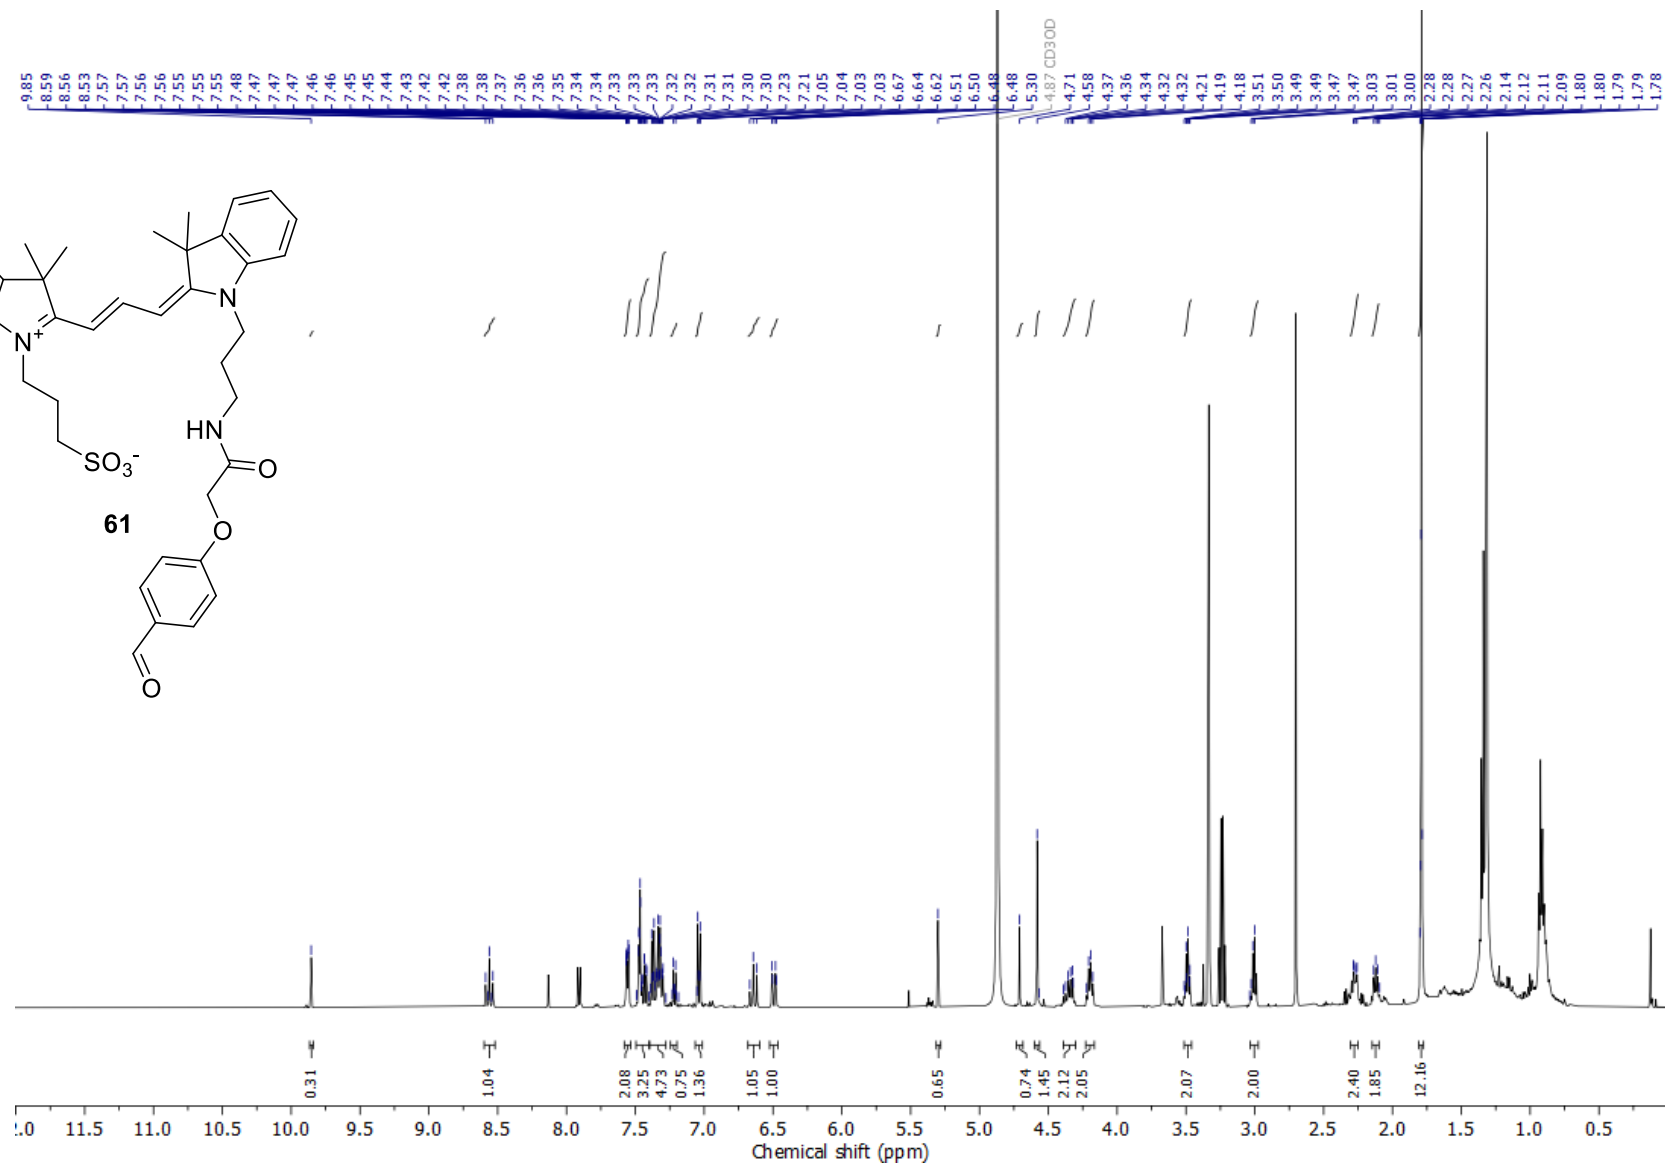

# $^{13}\text{C}$ NMR(500 MHz, MeOD)



61

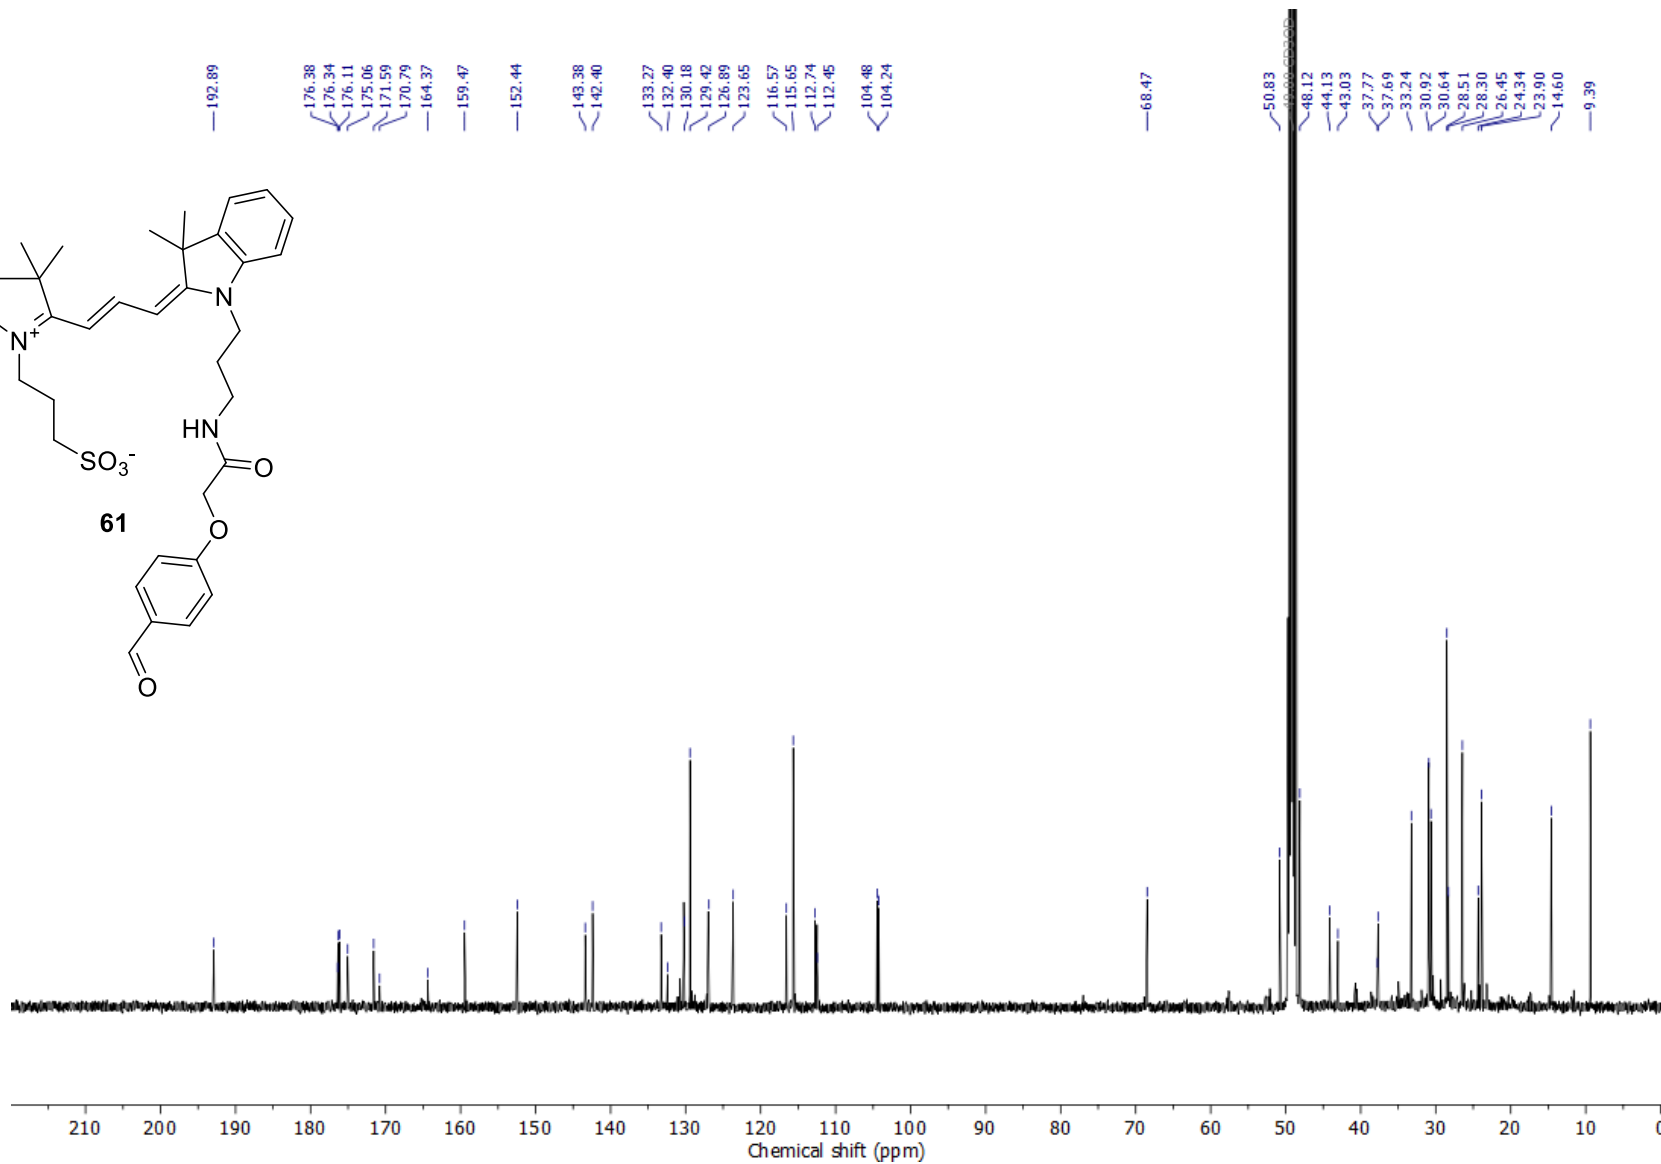

# $^1\text{H}$ NMR (400 MHz, $\text{CDCl}_3$ )

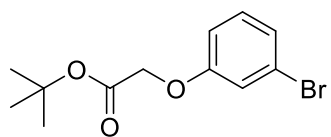

62

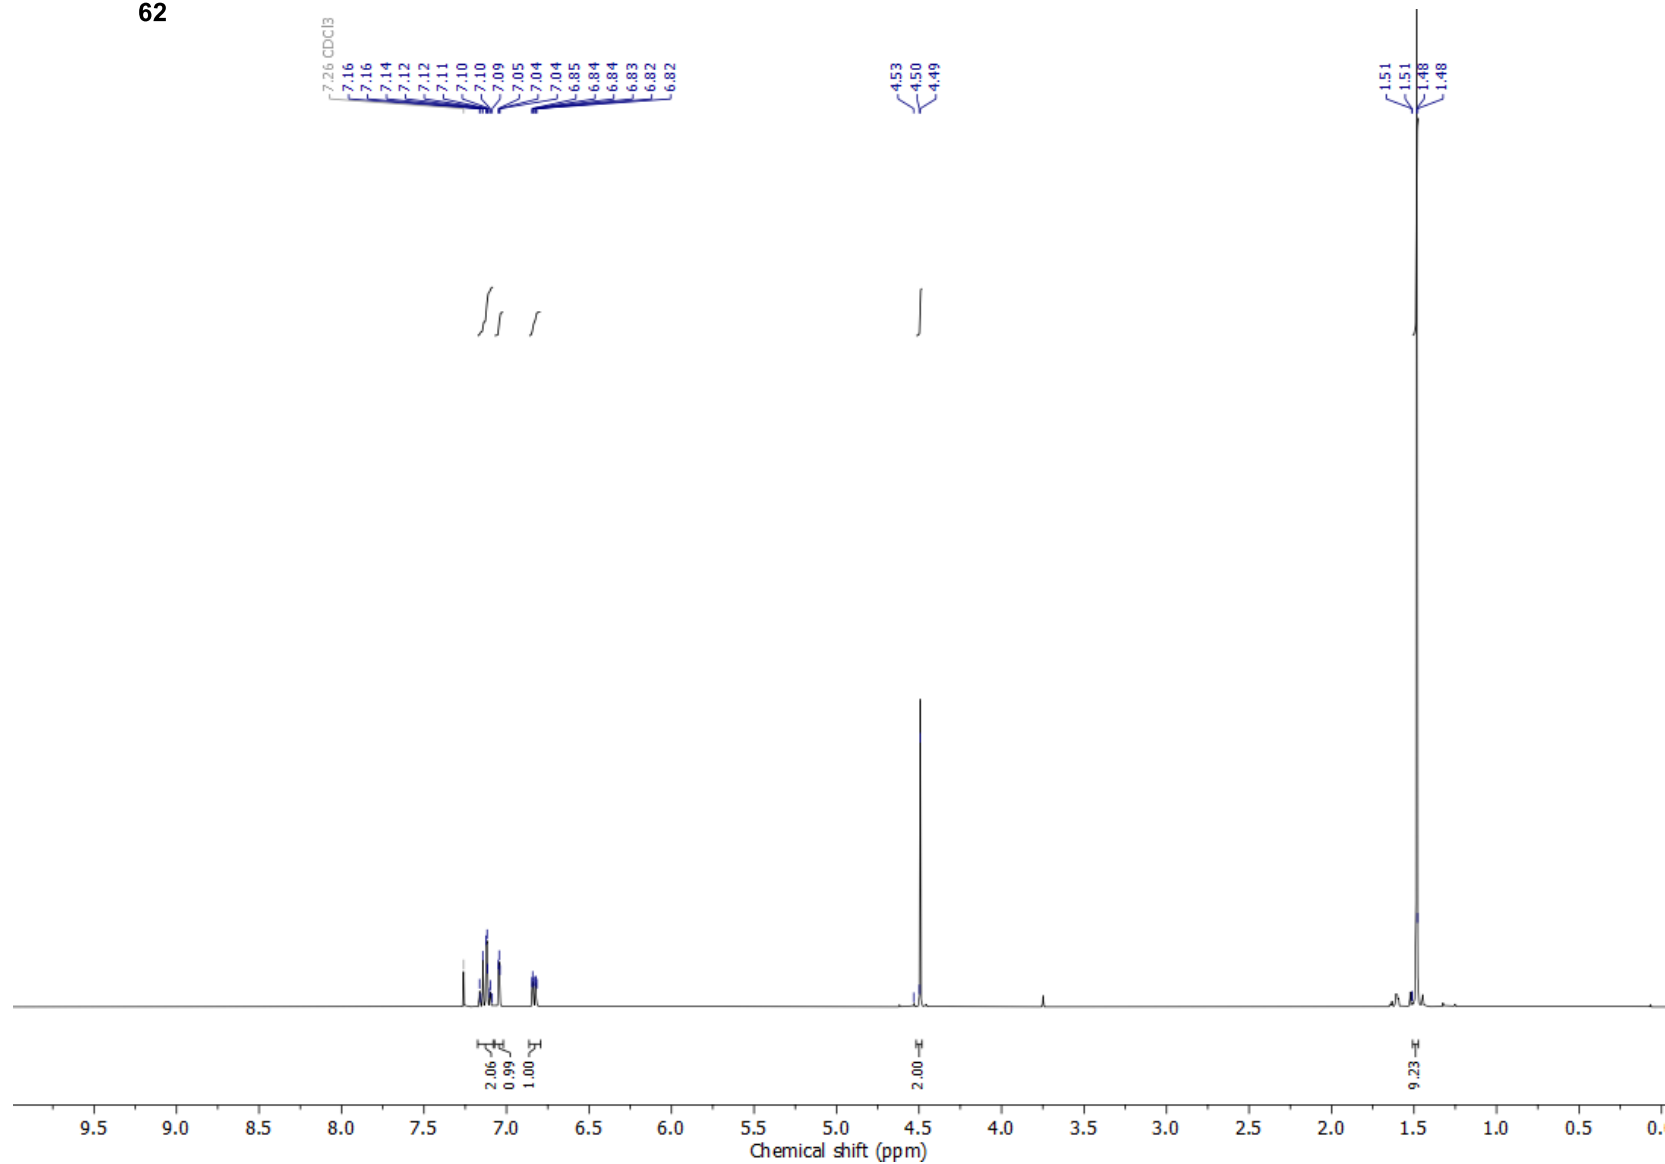

# $^{13}\text{C}$ NMR (100 MHz, $\text{CDCl}_3$ )

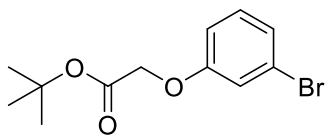

62

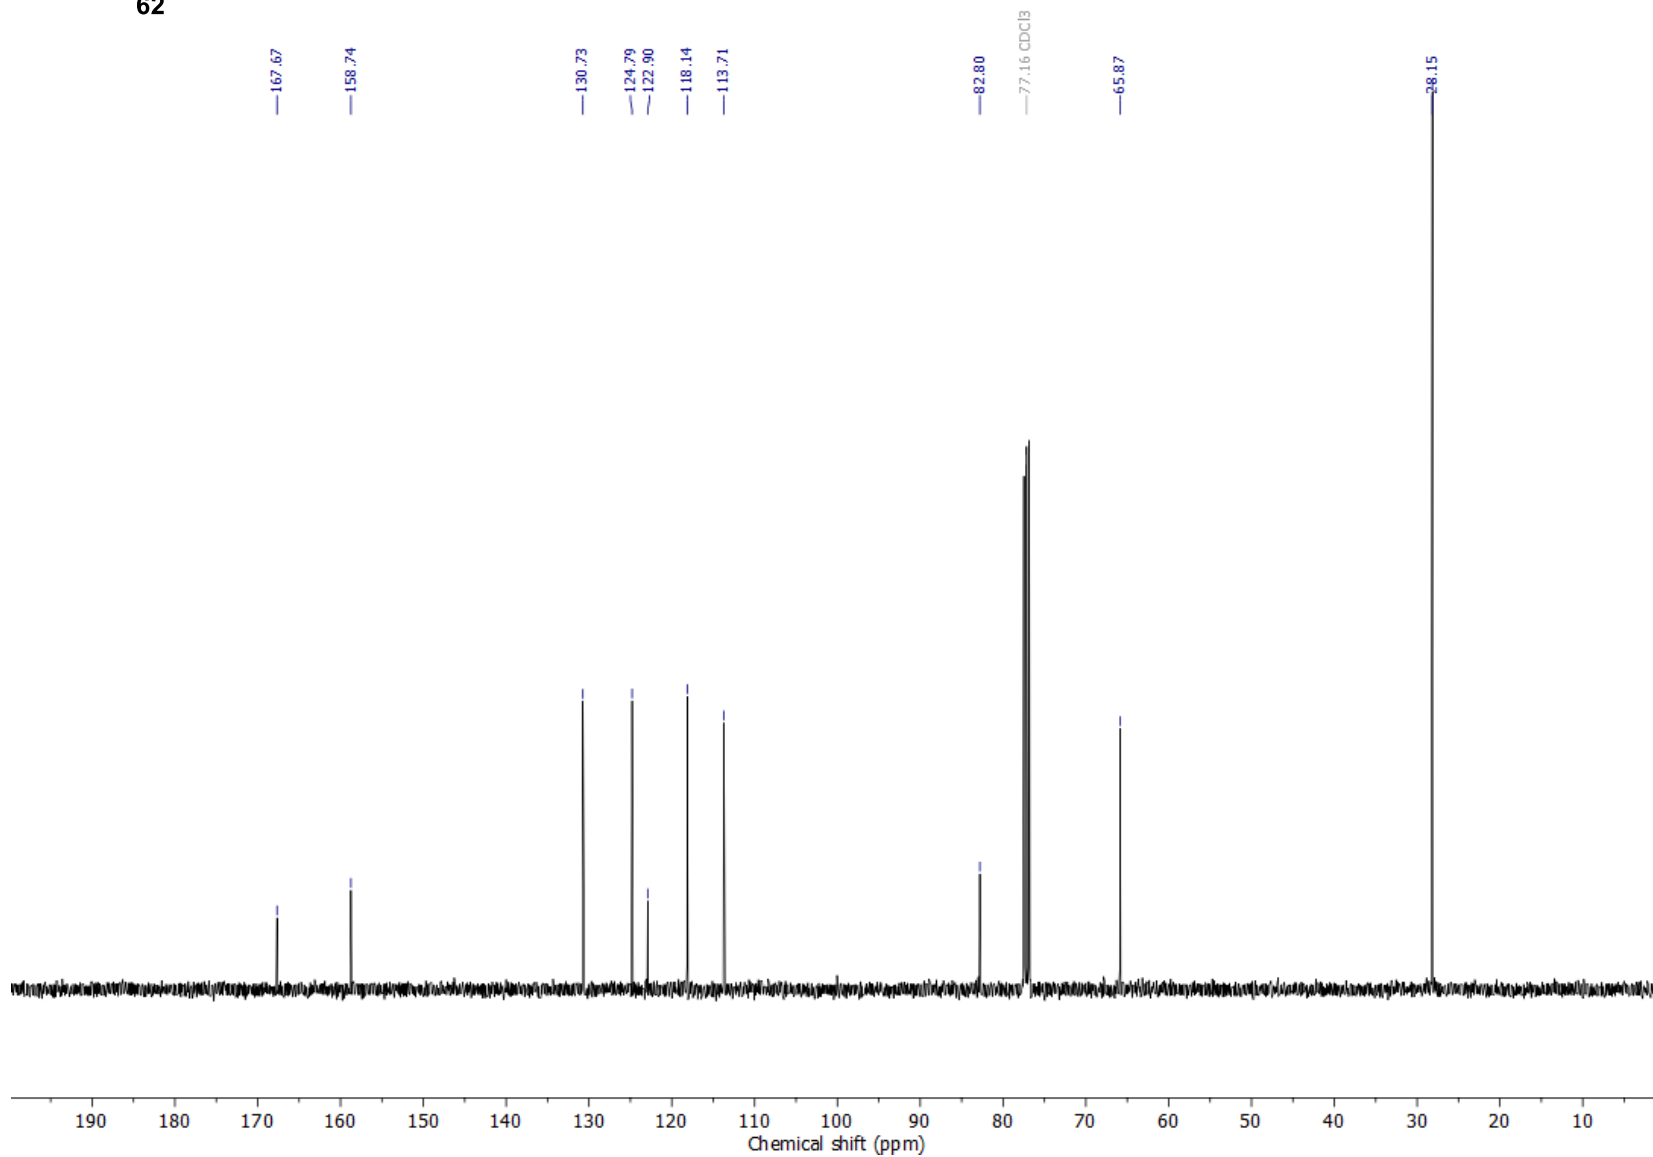

# $^1\text{H}$ NMR (400 MHz, $\text{CDCl}_3$ )

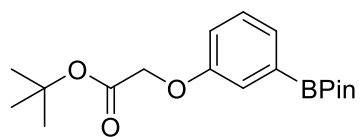

63

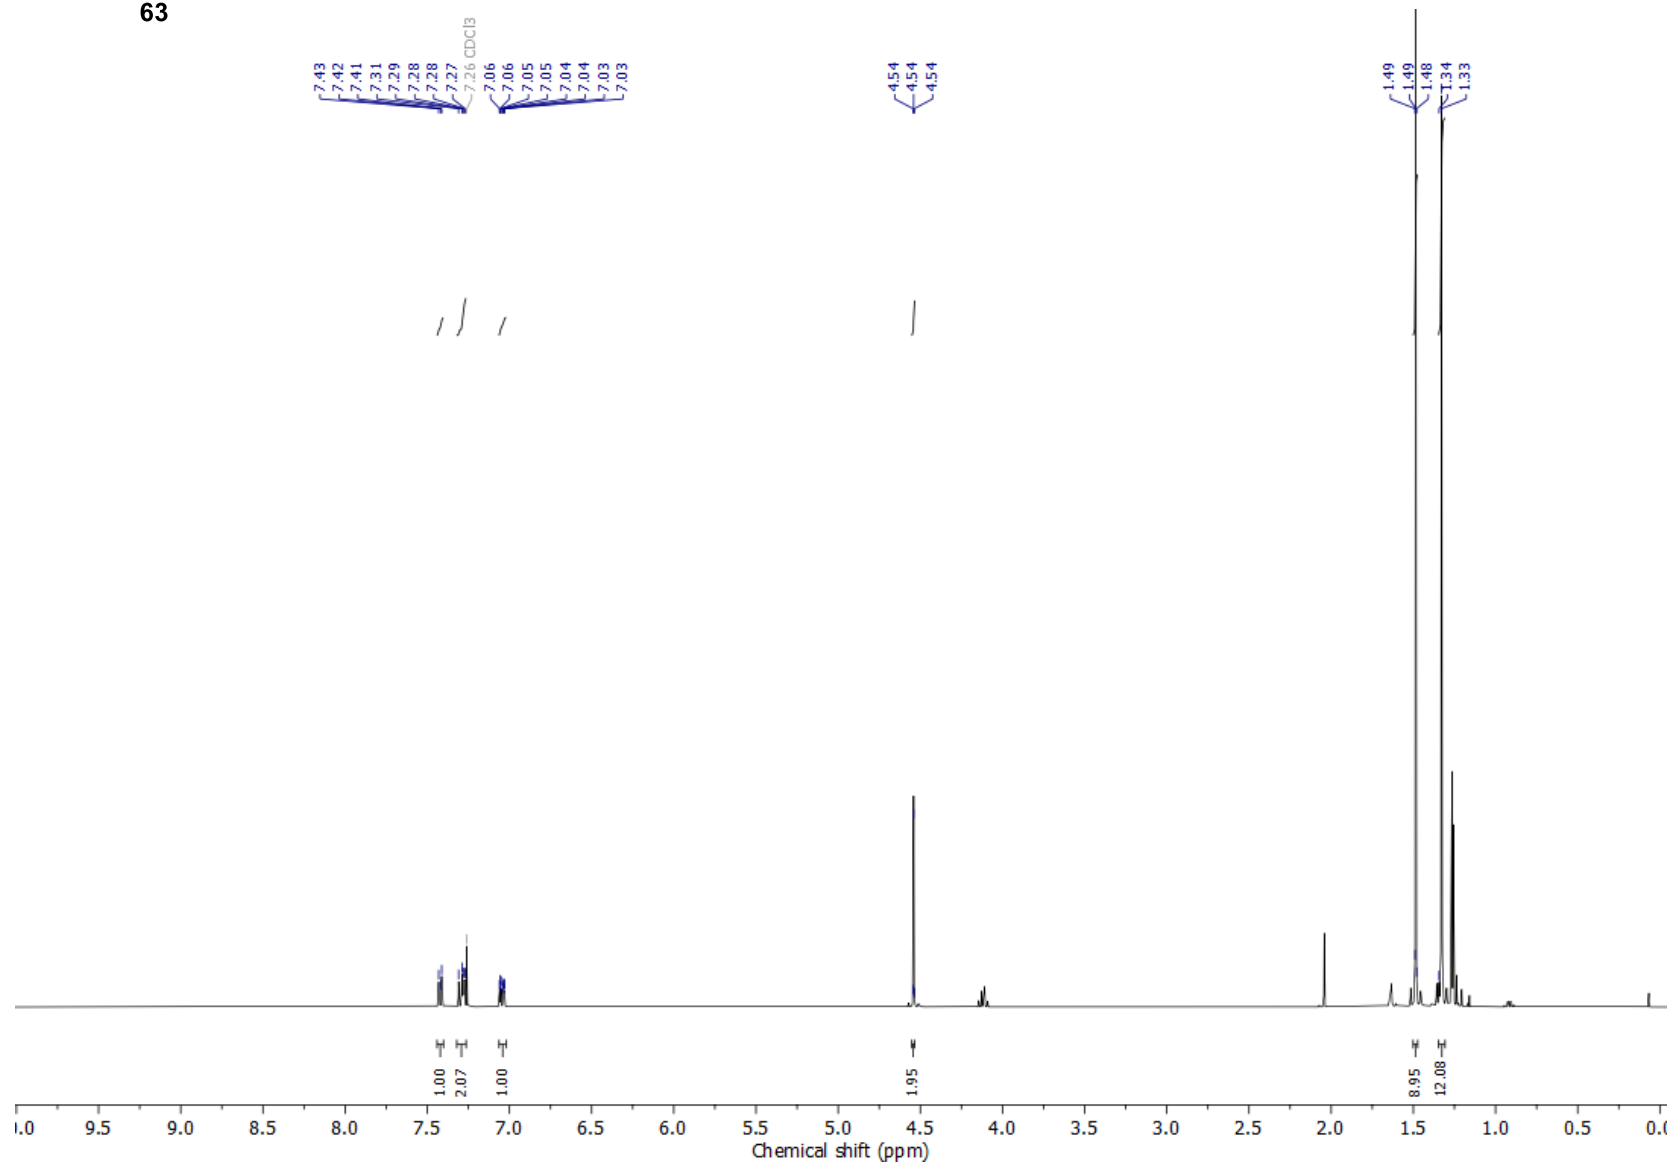

# $^{13}\text{C}$ NMR (100 MHz, $\text{CDCl}_3$ )

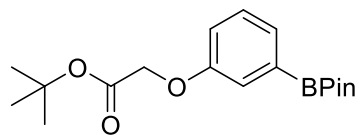

63

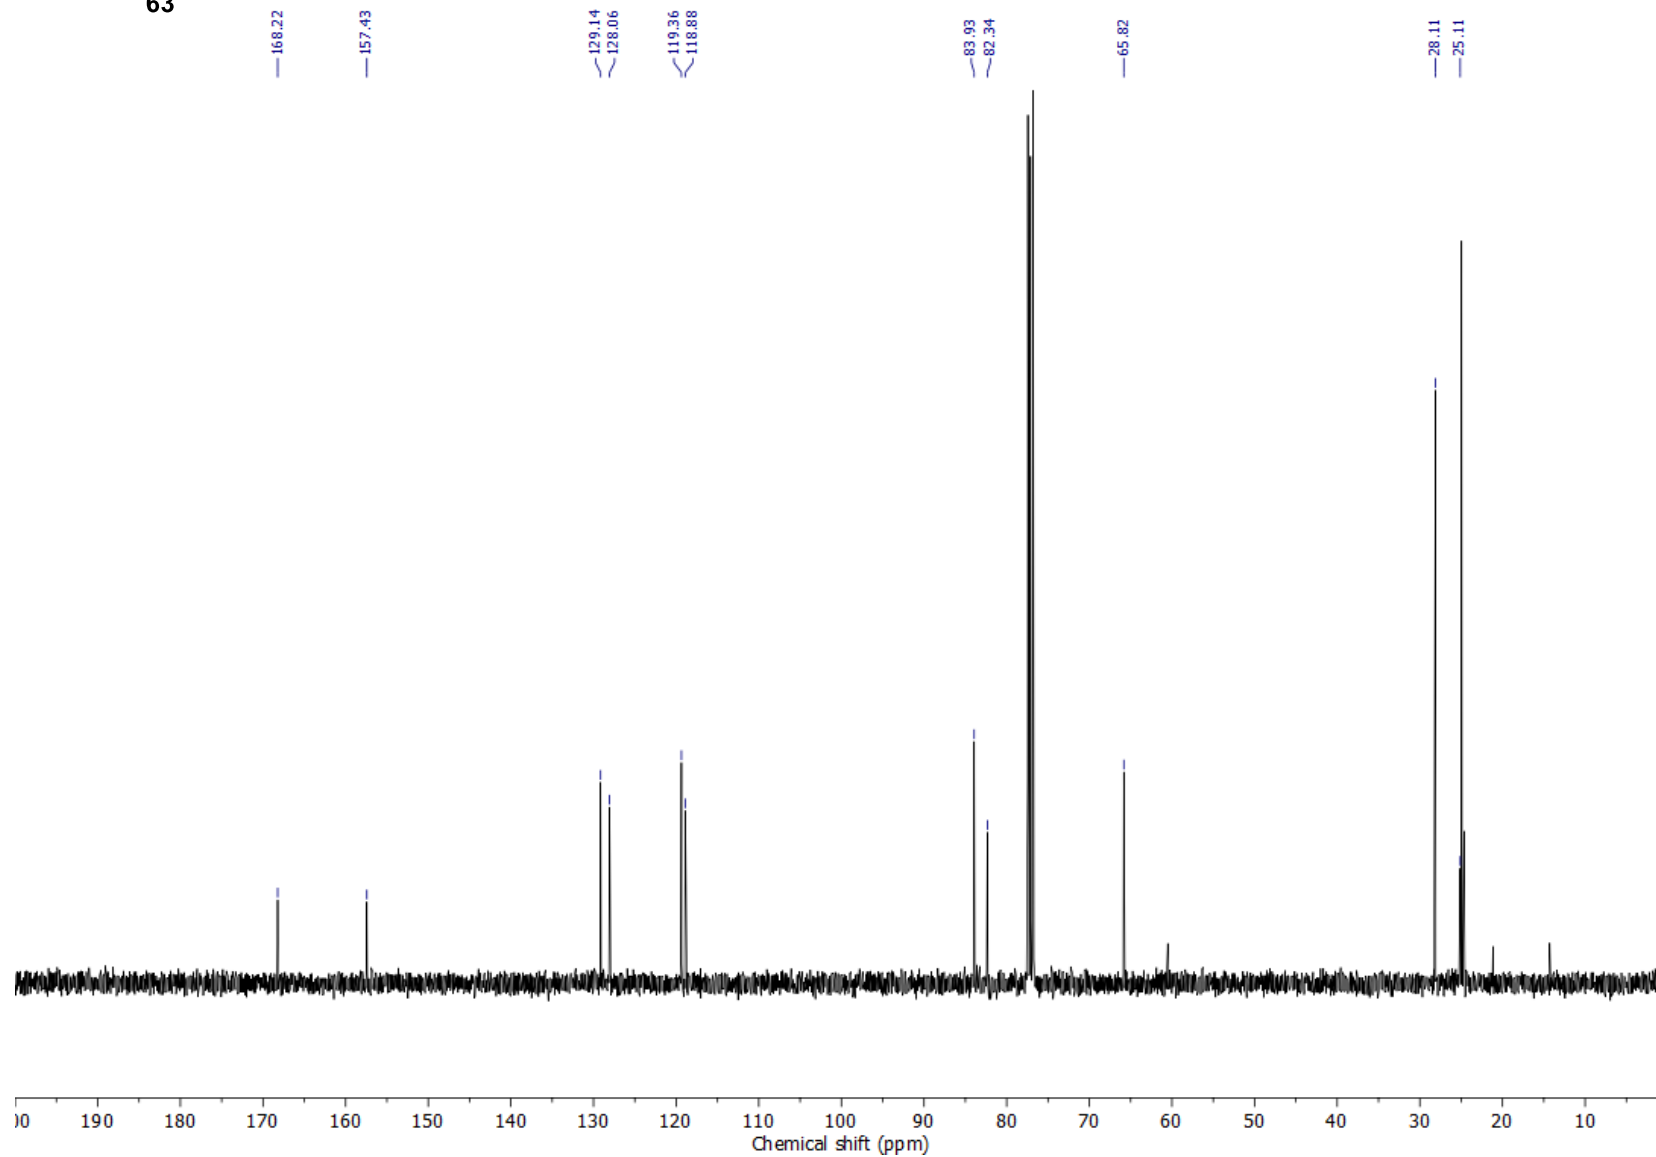

# $^1\text{H}$ NMR (400 MHz, MeOD)

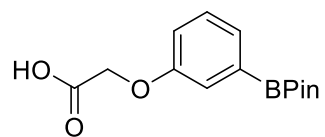

**64**

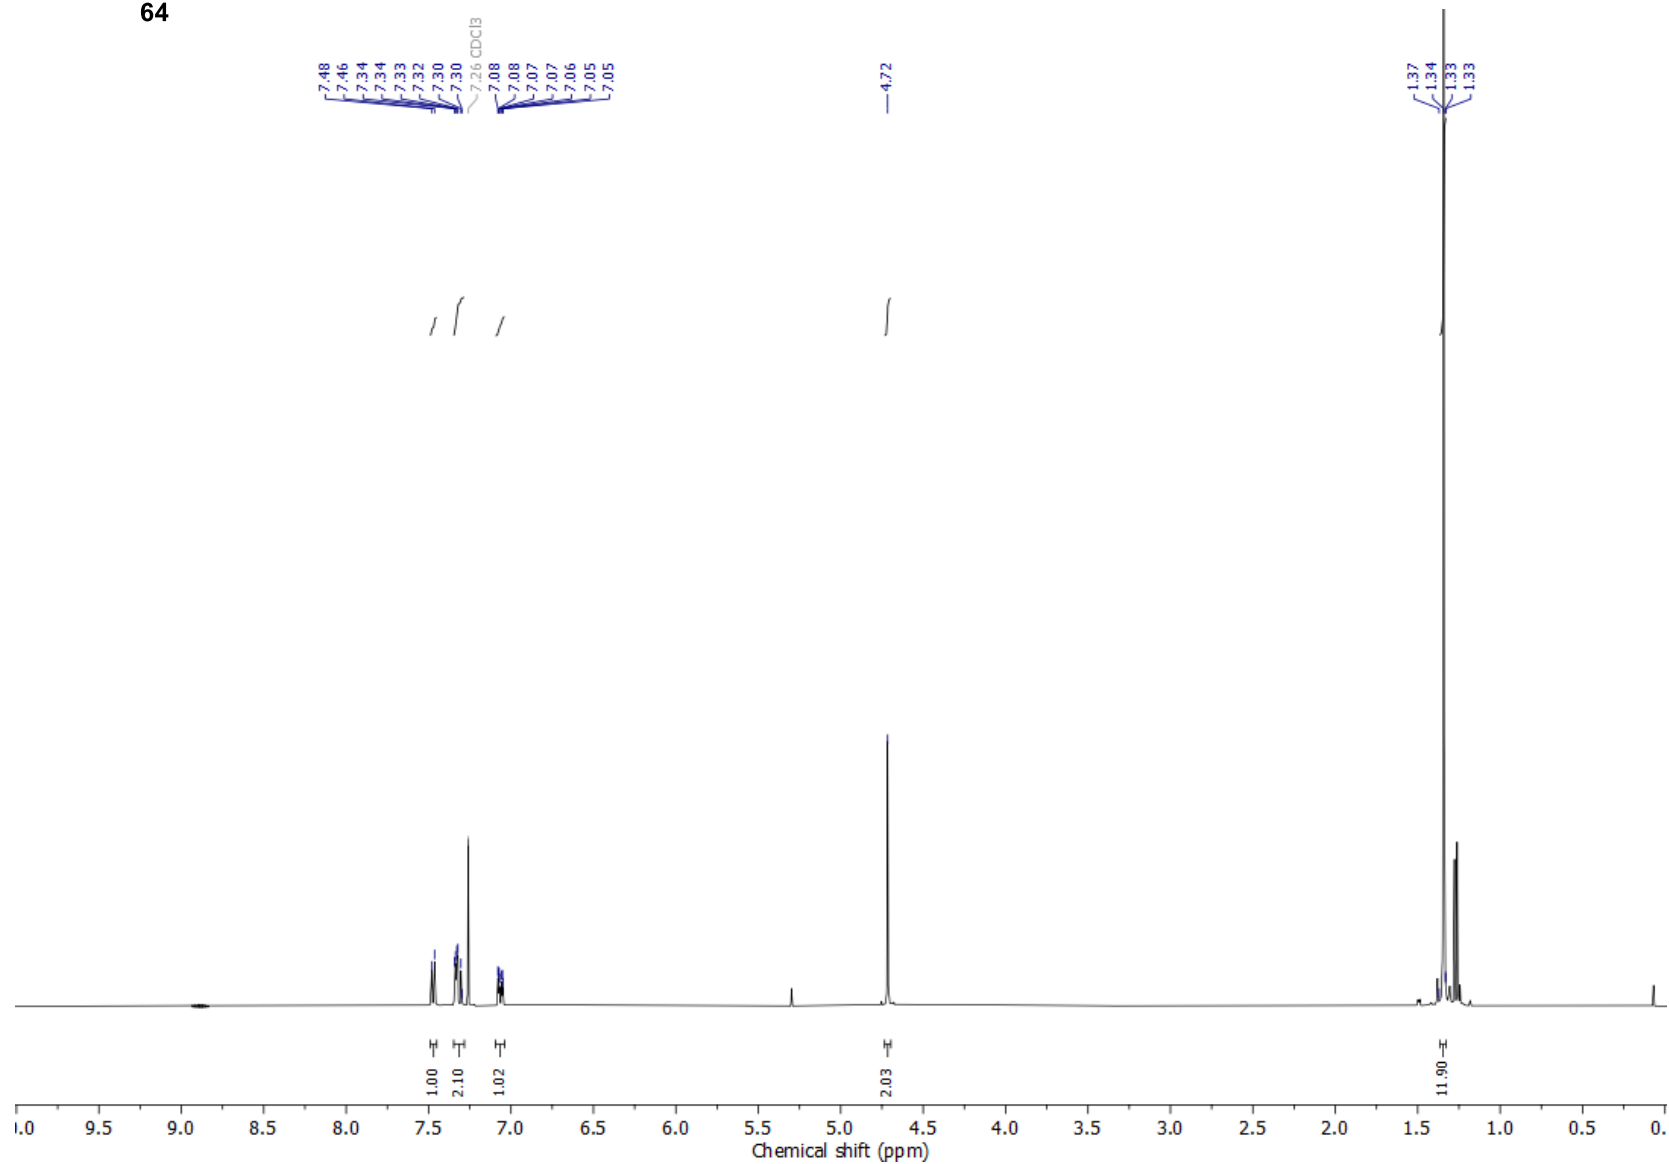

# $^{13}\text{C}$ NMR (100 MHz, MeOD)



**64**

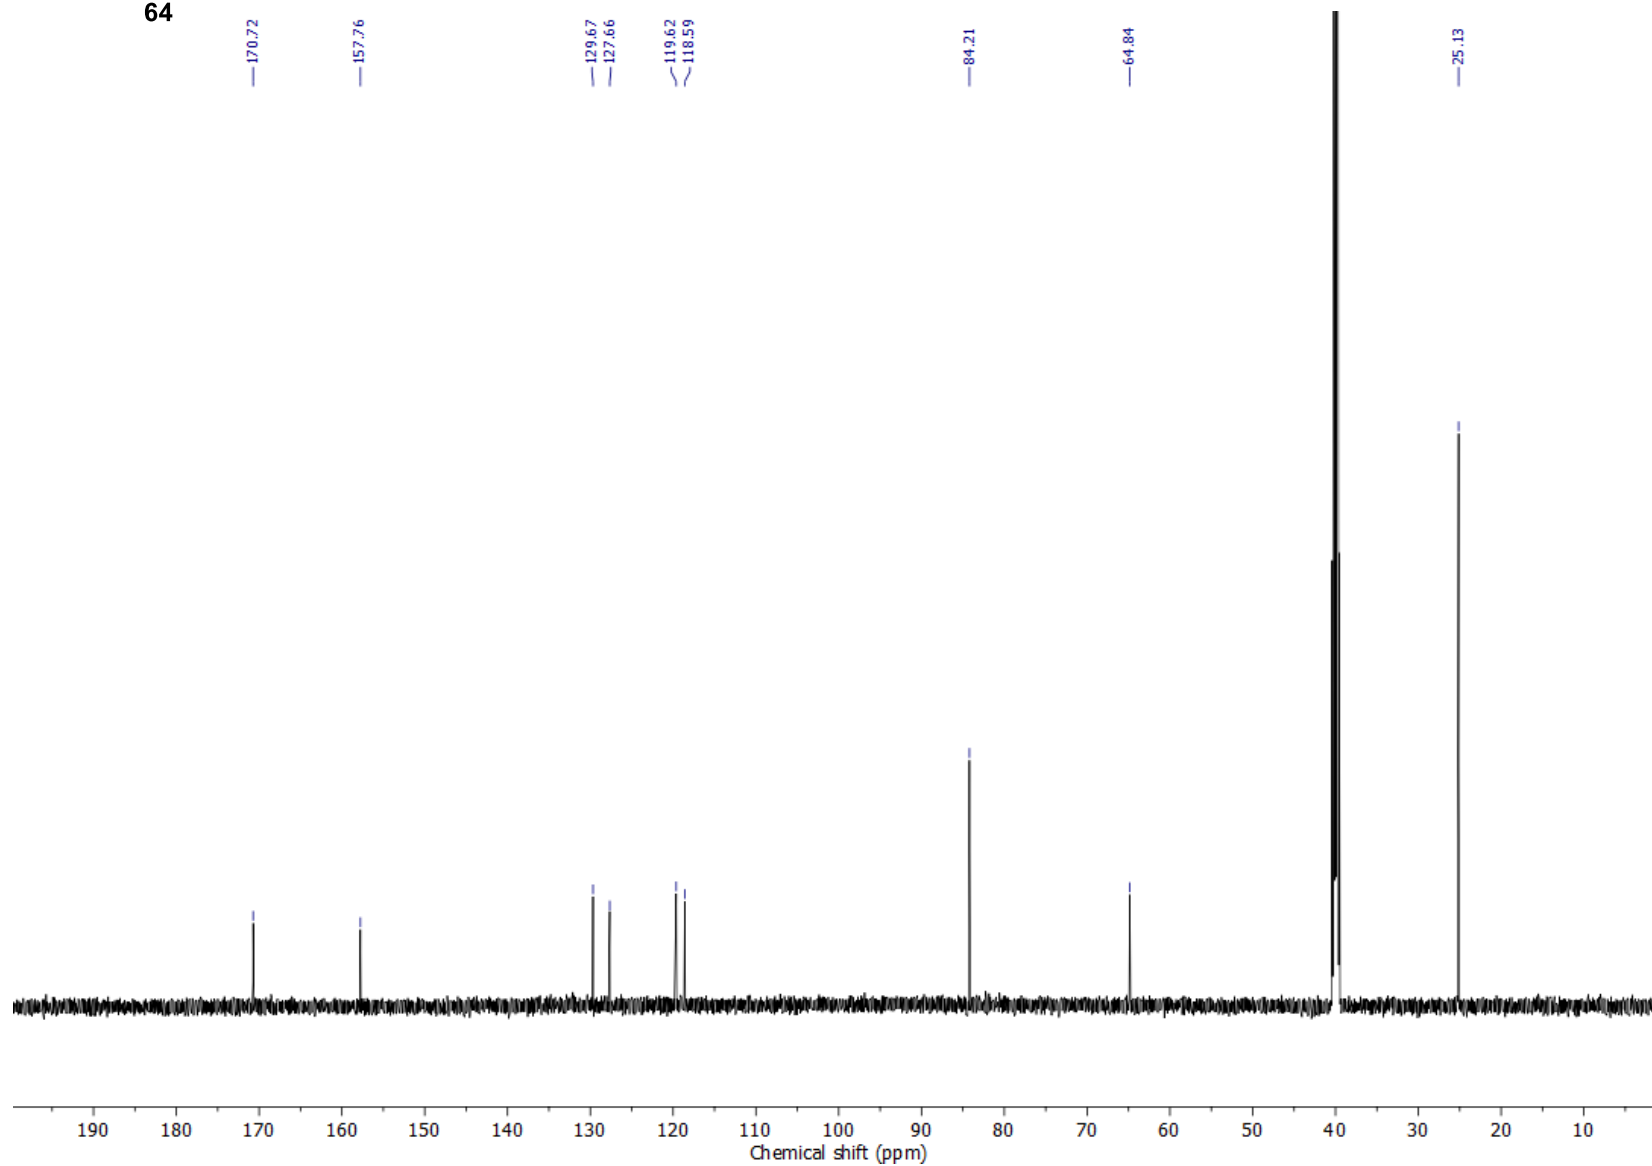

# <sup>1</sup>H NMR (500 MHz, MeOD)

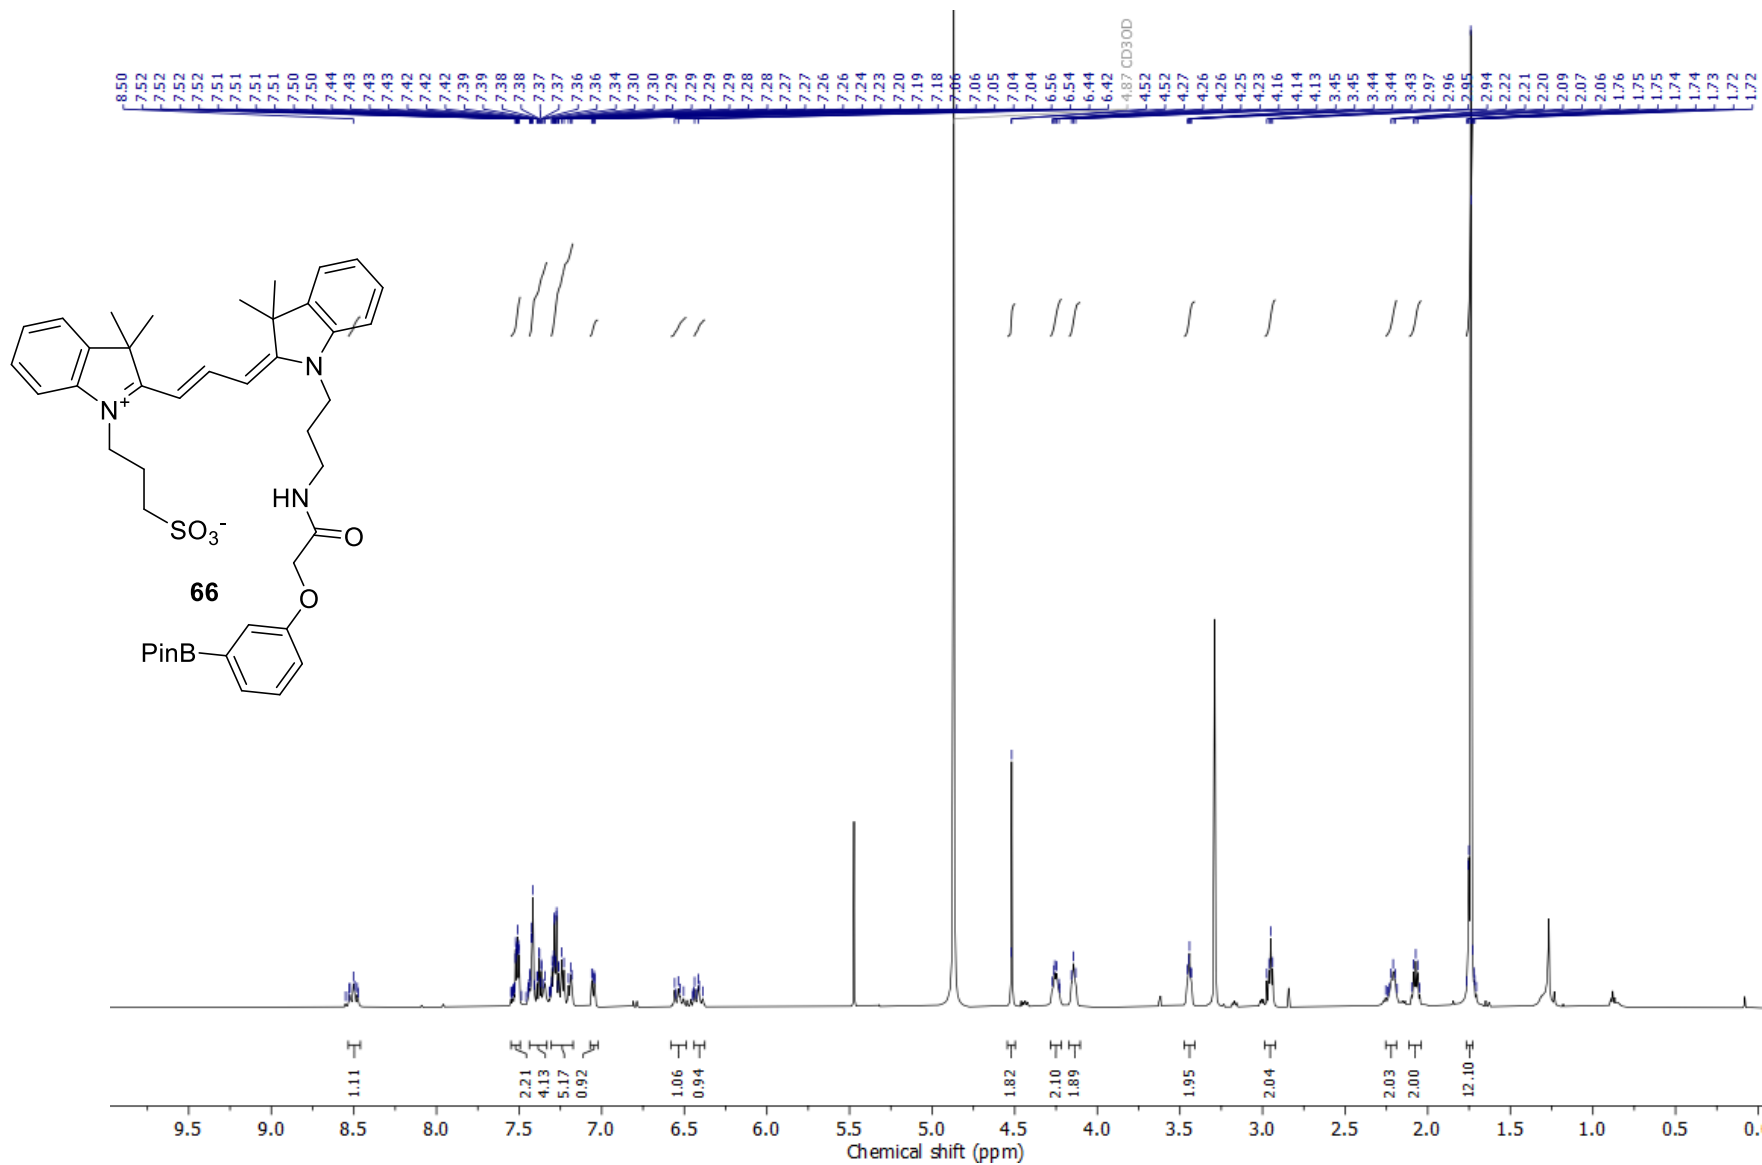

# $^{13}\text{C}$ NMR(500 MHz, MeOD)

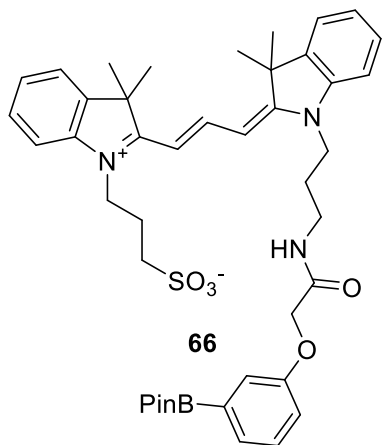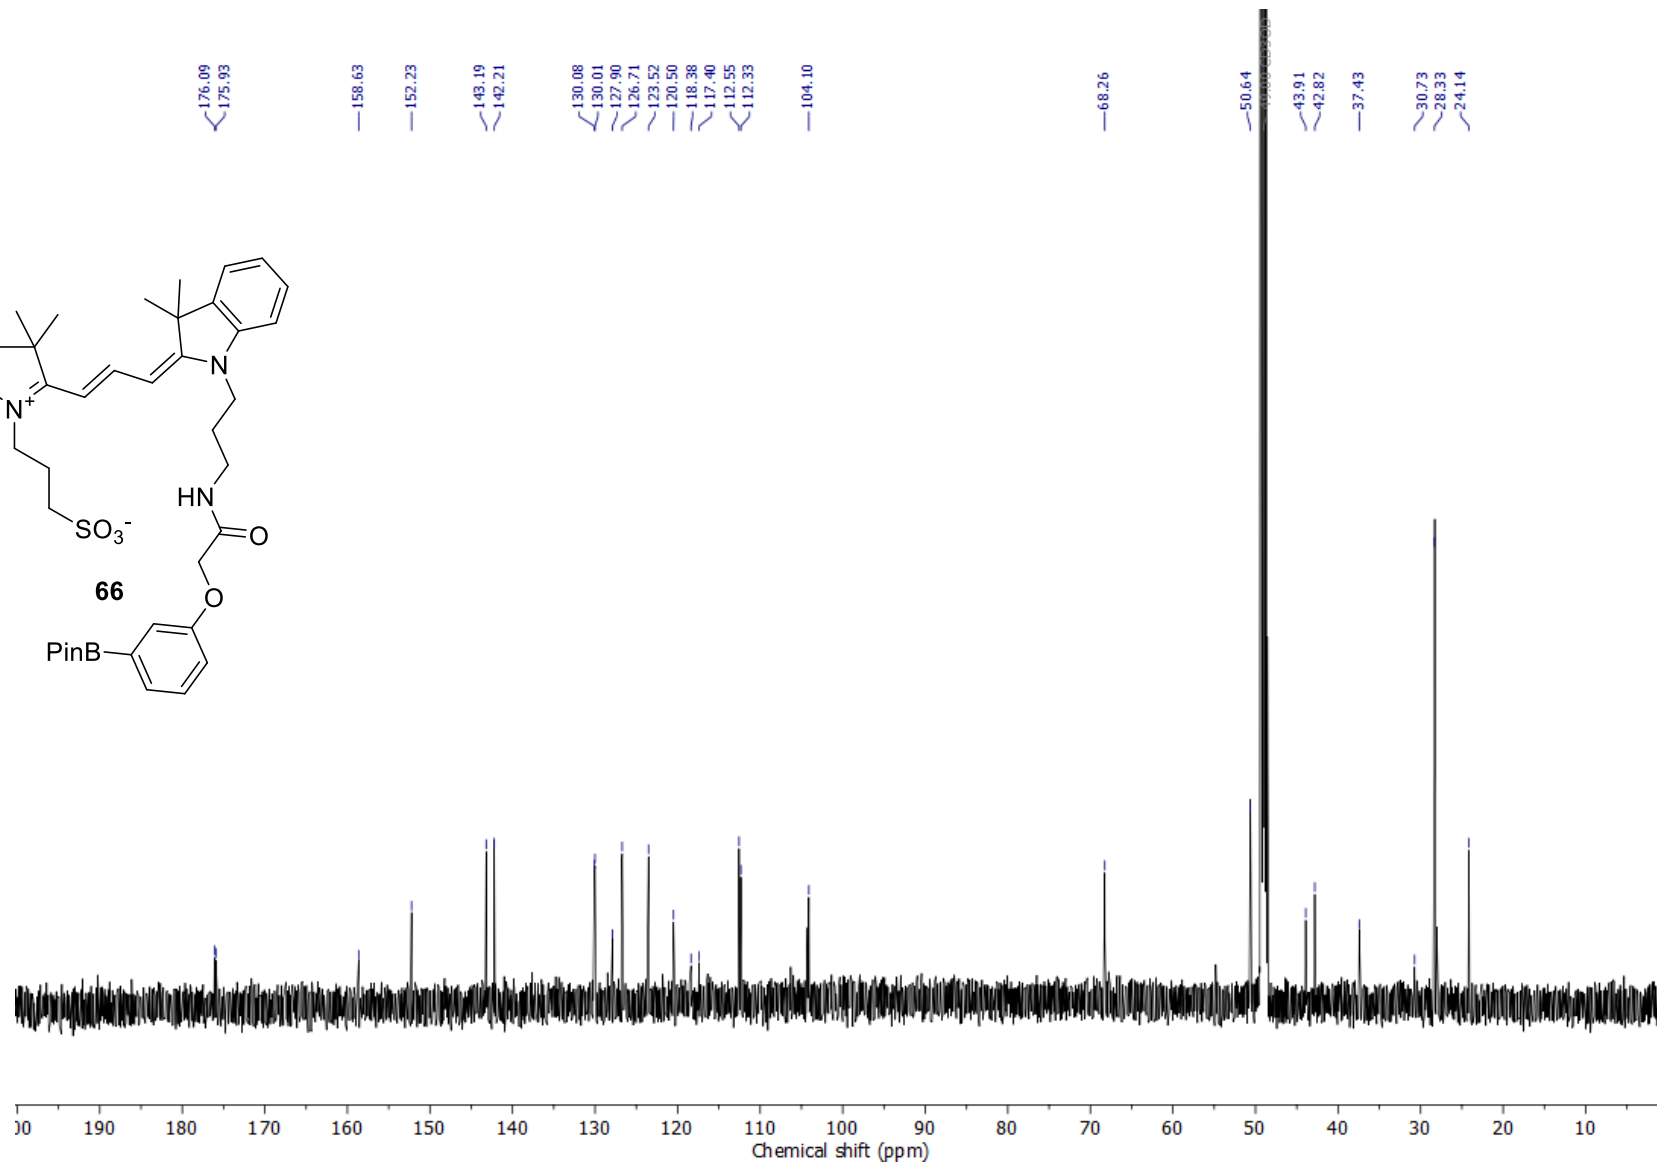

# <sup>1</sup>H NMR (500 MHz, MeOD)

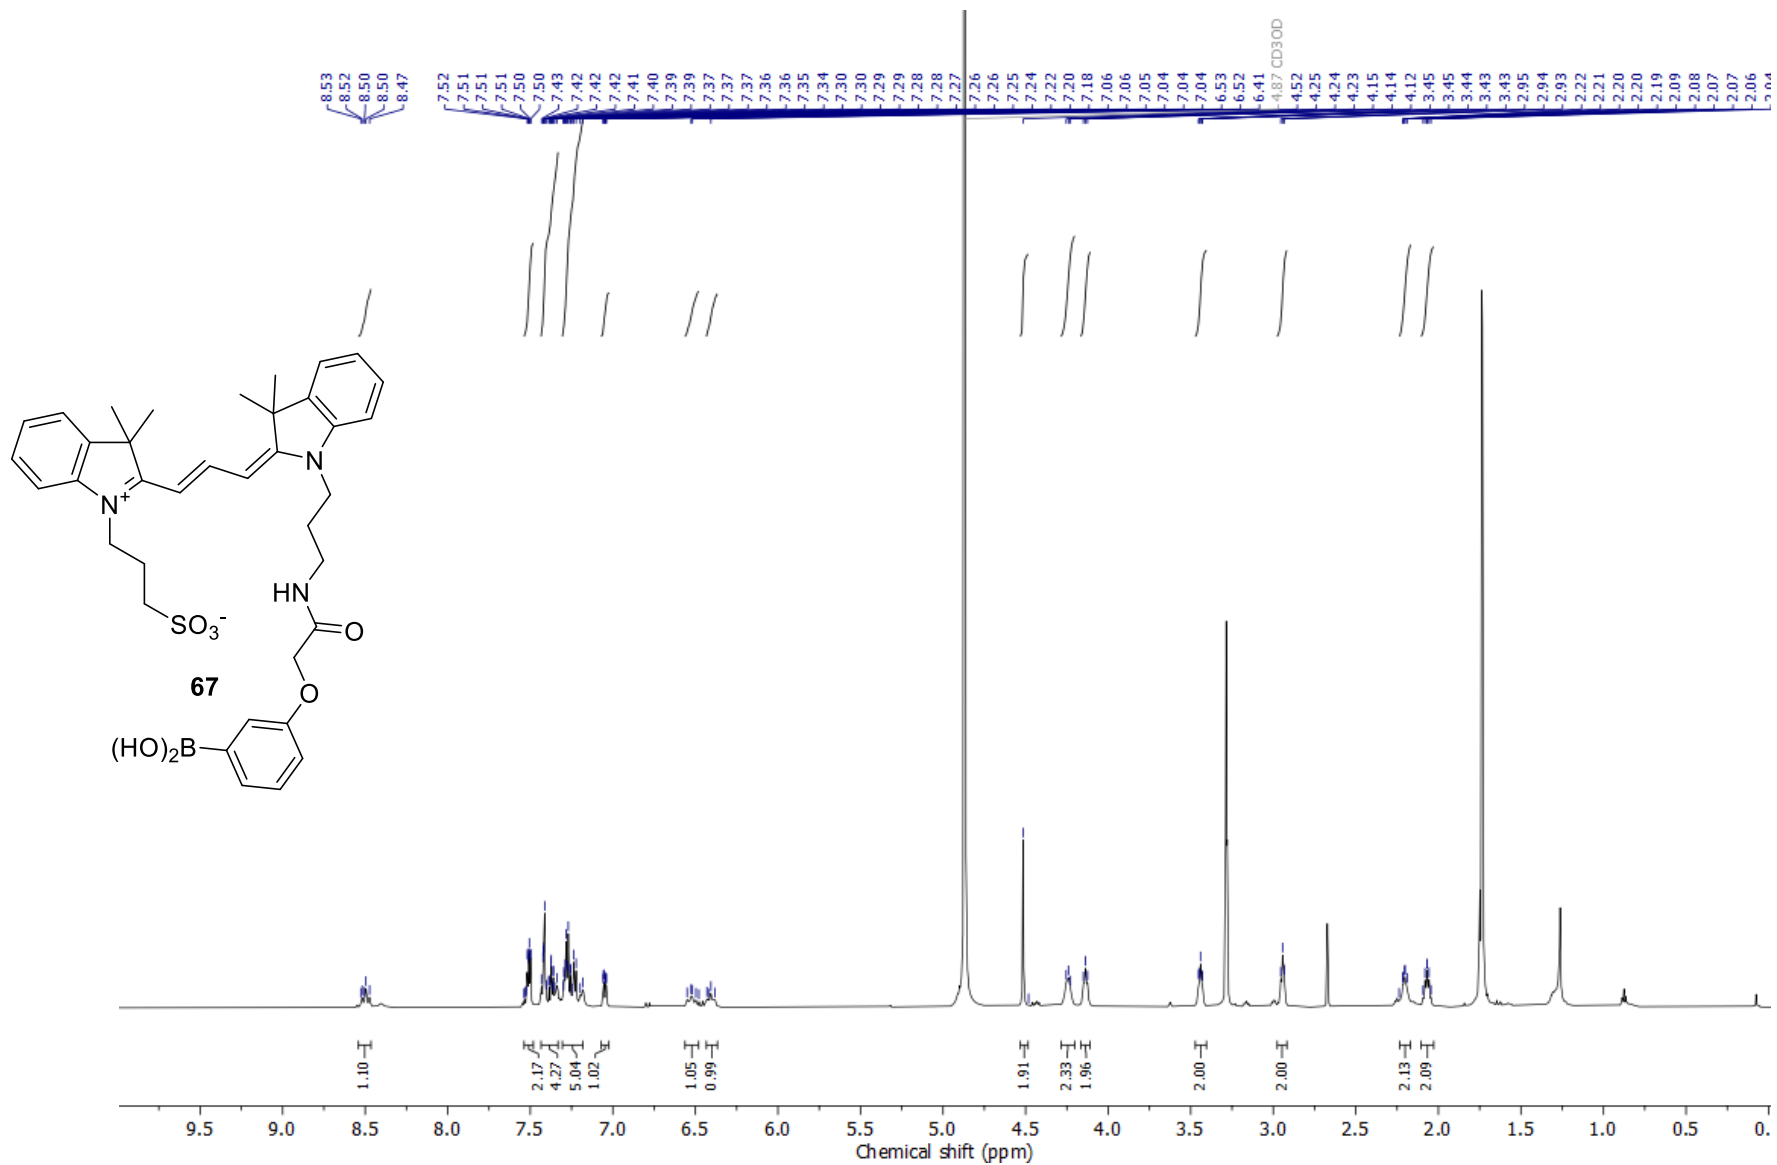

# $^{13}\text{C}$ NMR(500 MHz, MeOD)

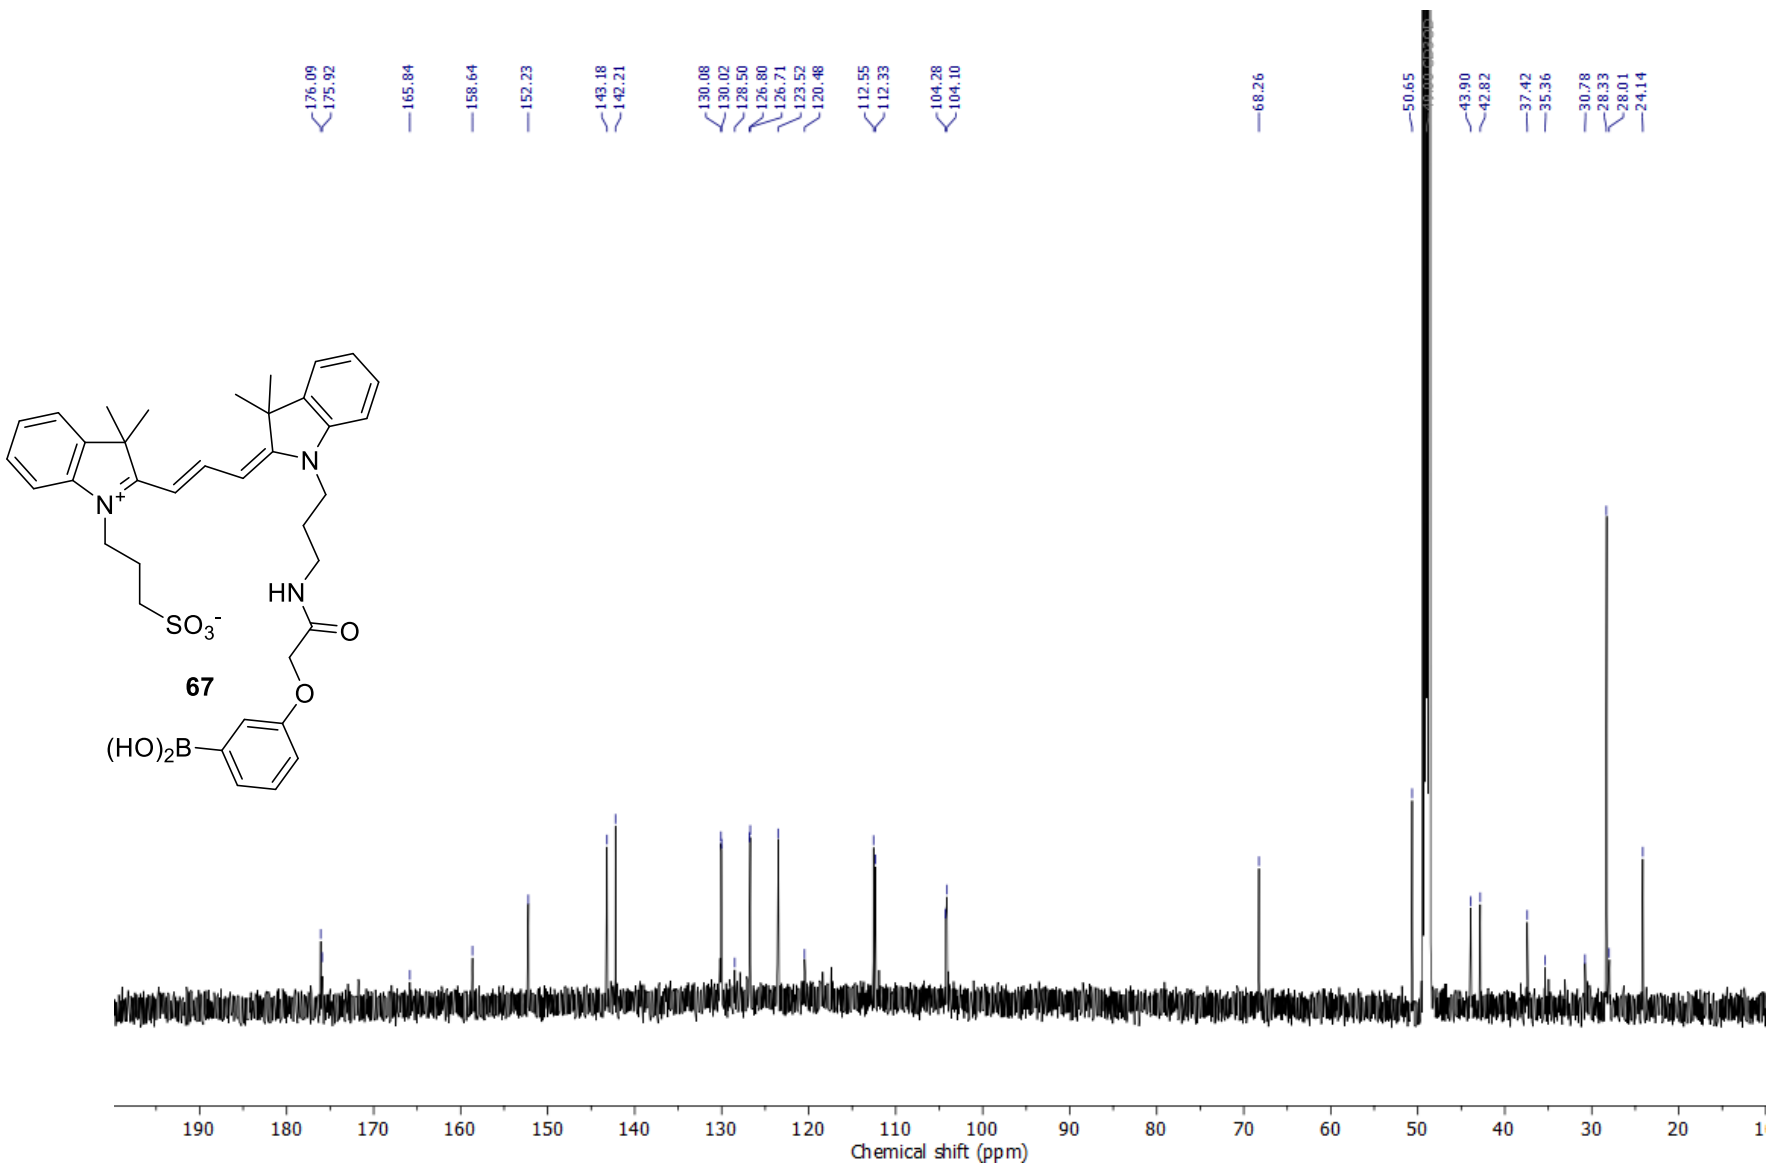

# $^1\text{H}$ NMR (400 MHz, $\text{CDCl}_3$ )

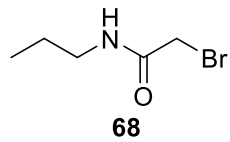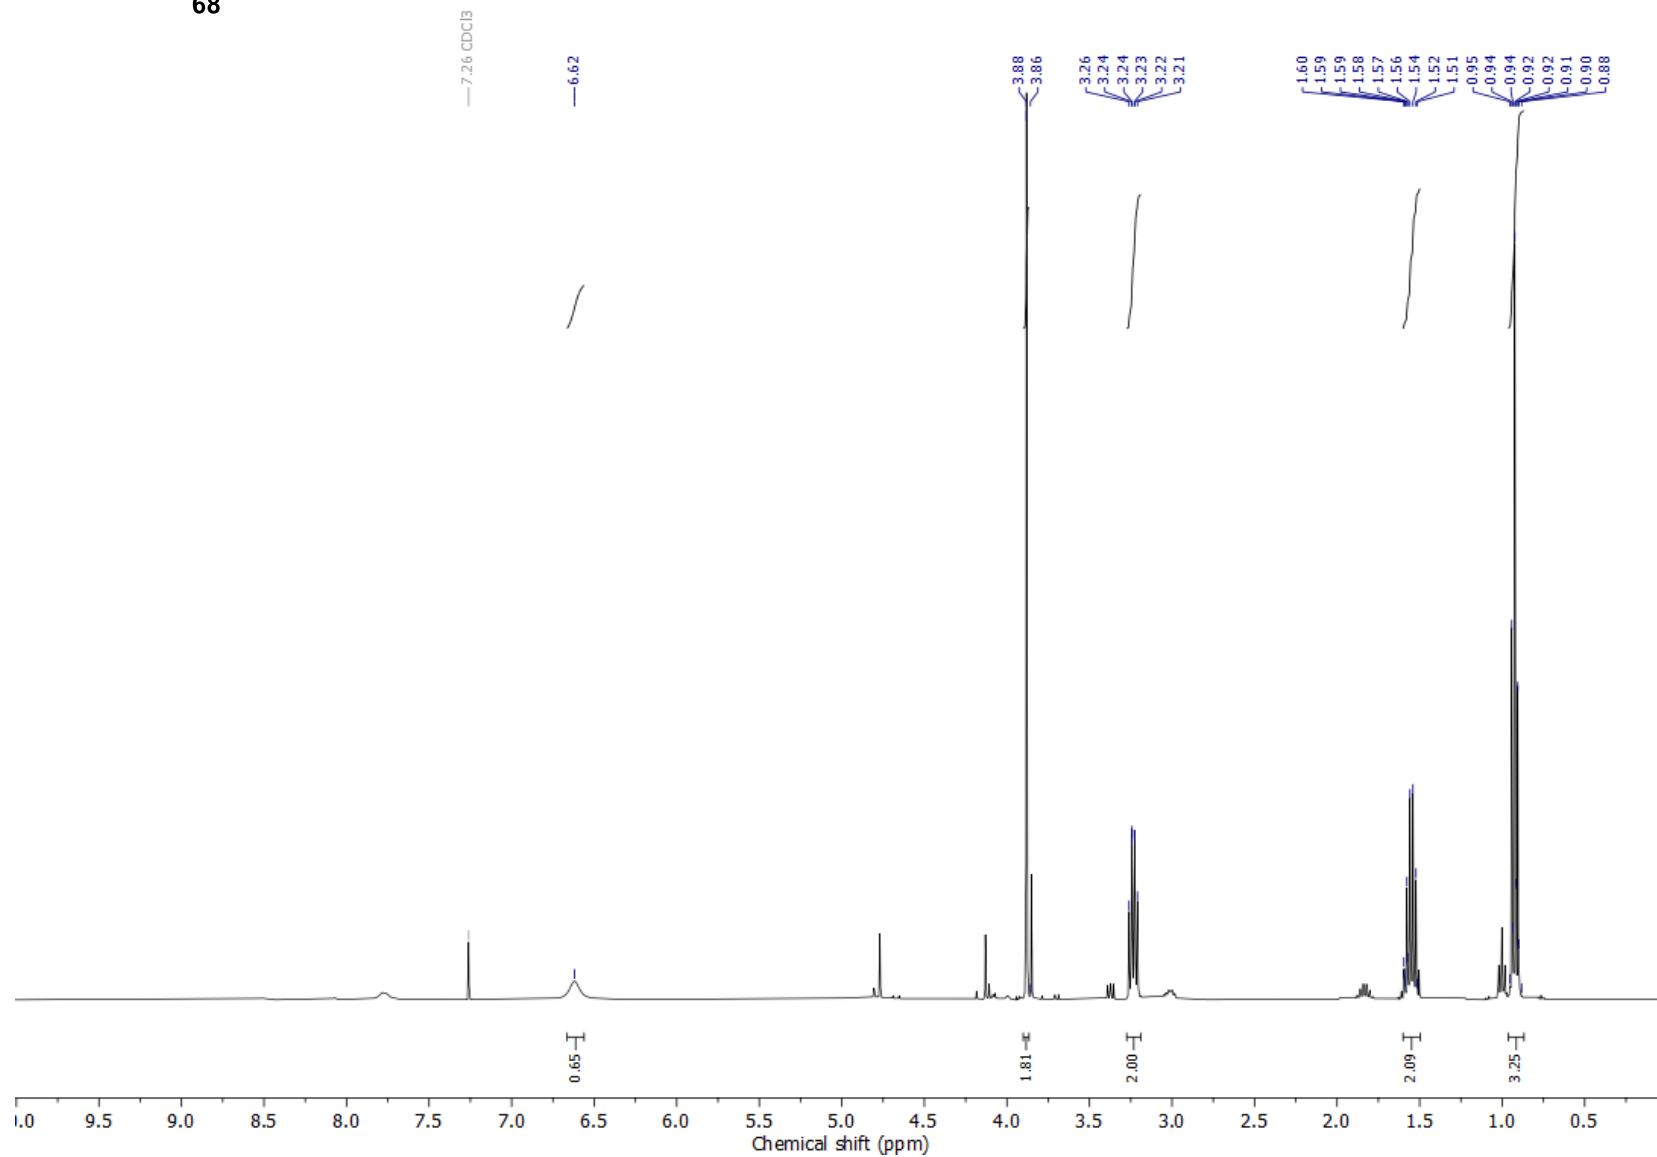

# $^{13}\text{C}$ NMR (100 MHz, $\text{CDCl}_3$ )

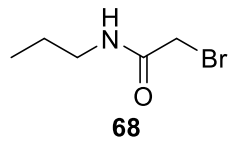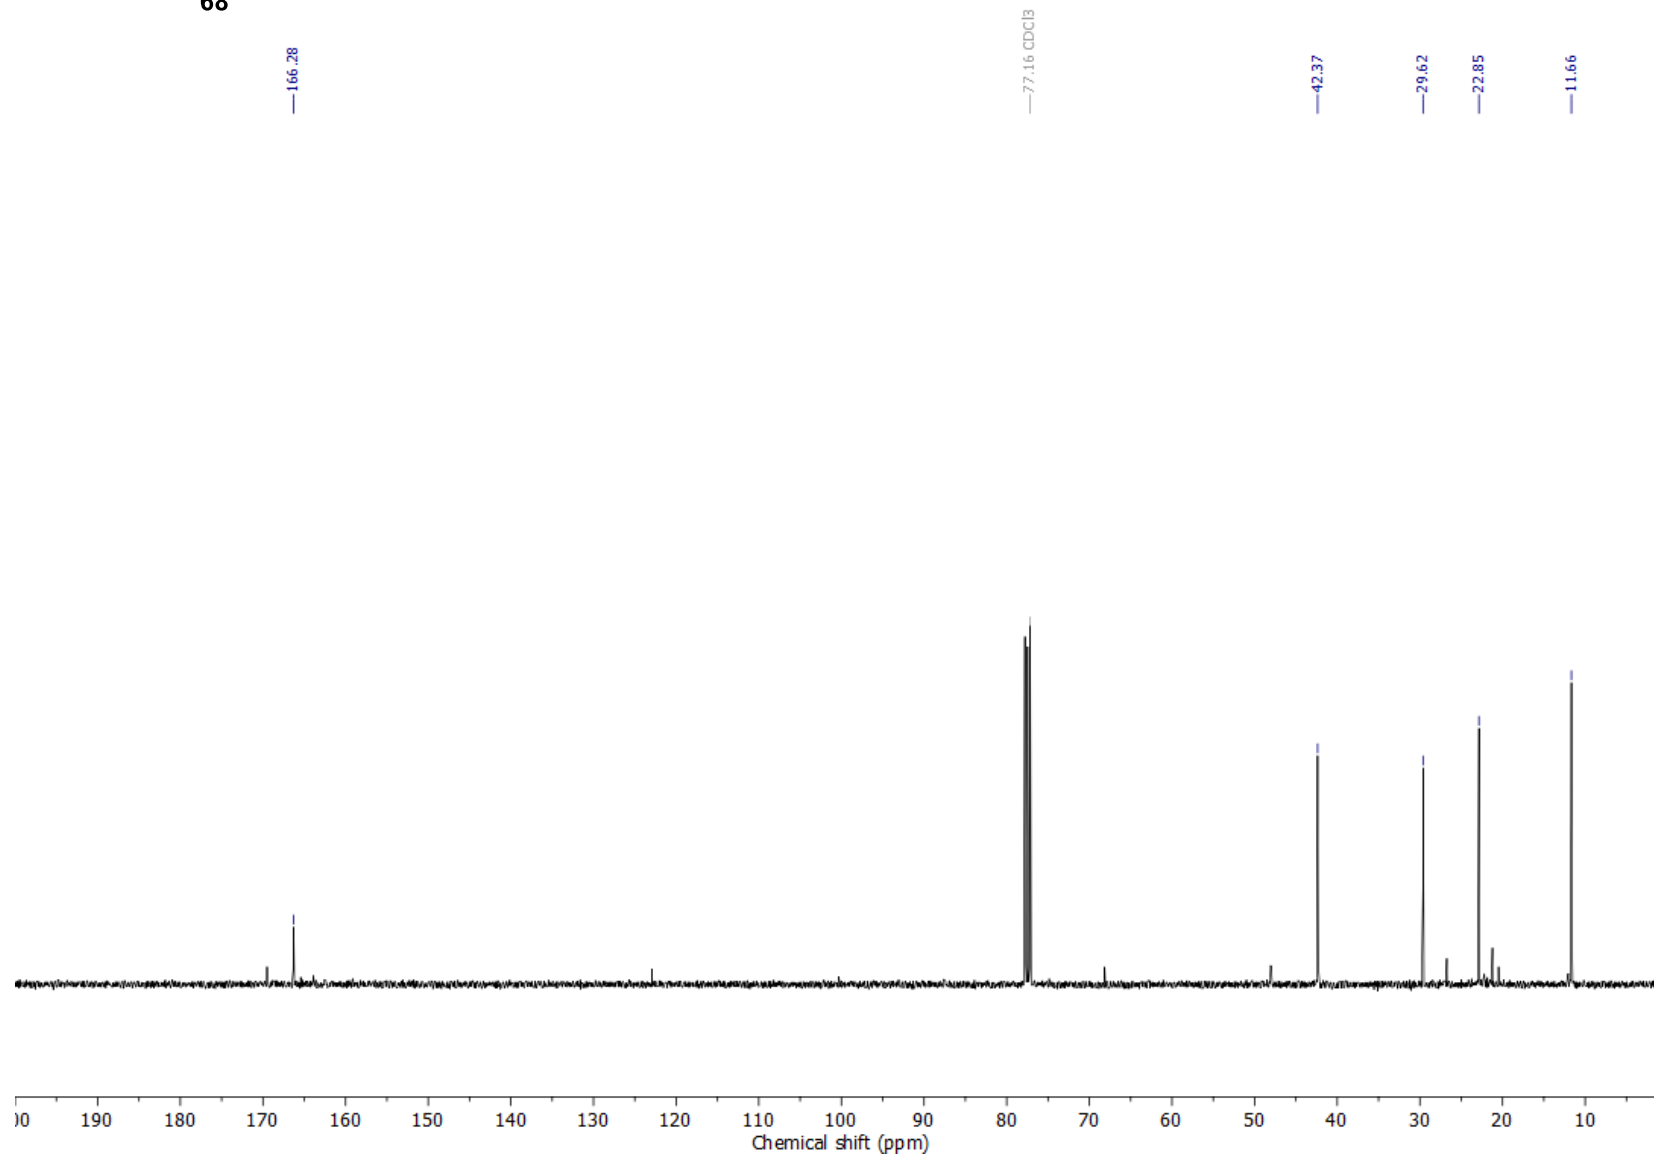

# $^1\text{H}$ NMR (400 MHz, $\text{CDCl}_3$ )

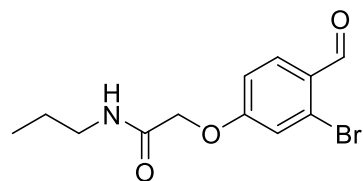

69

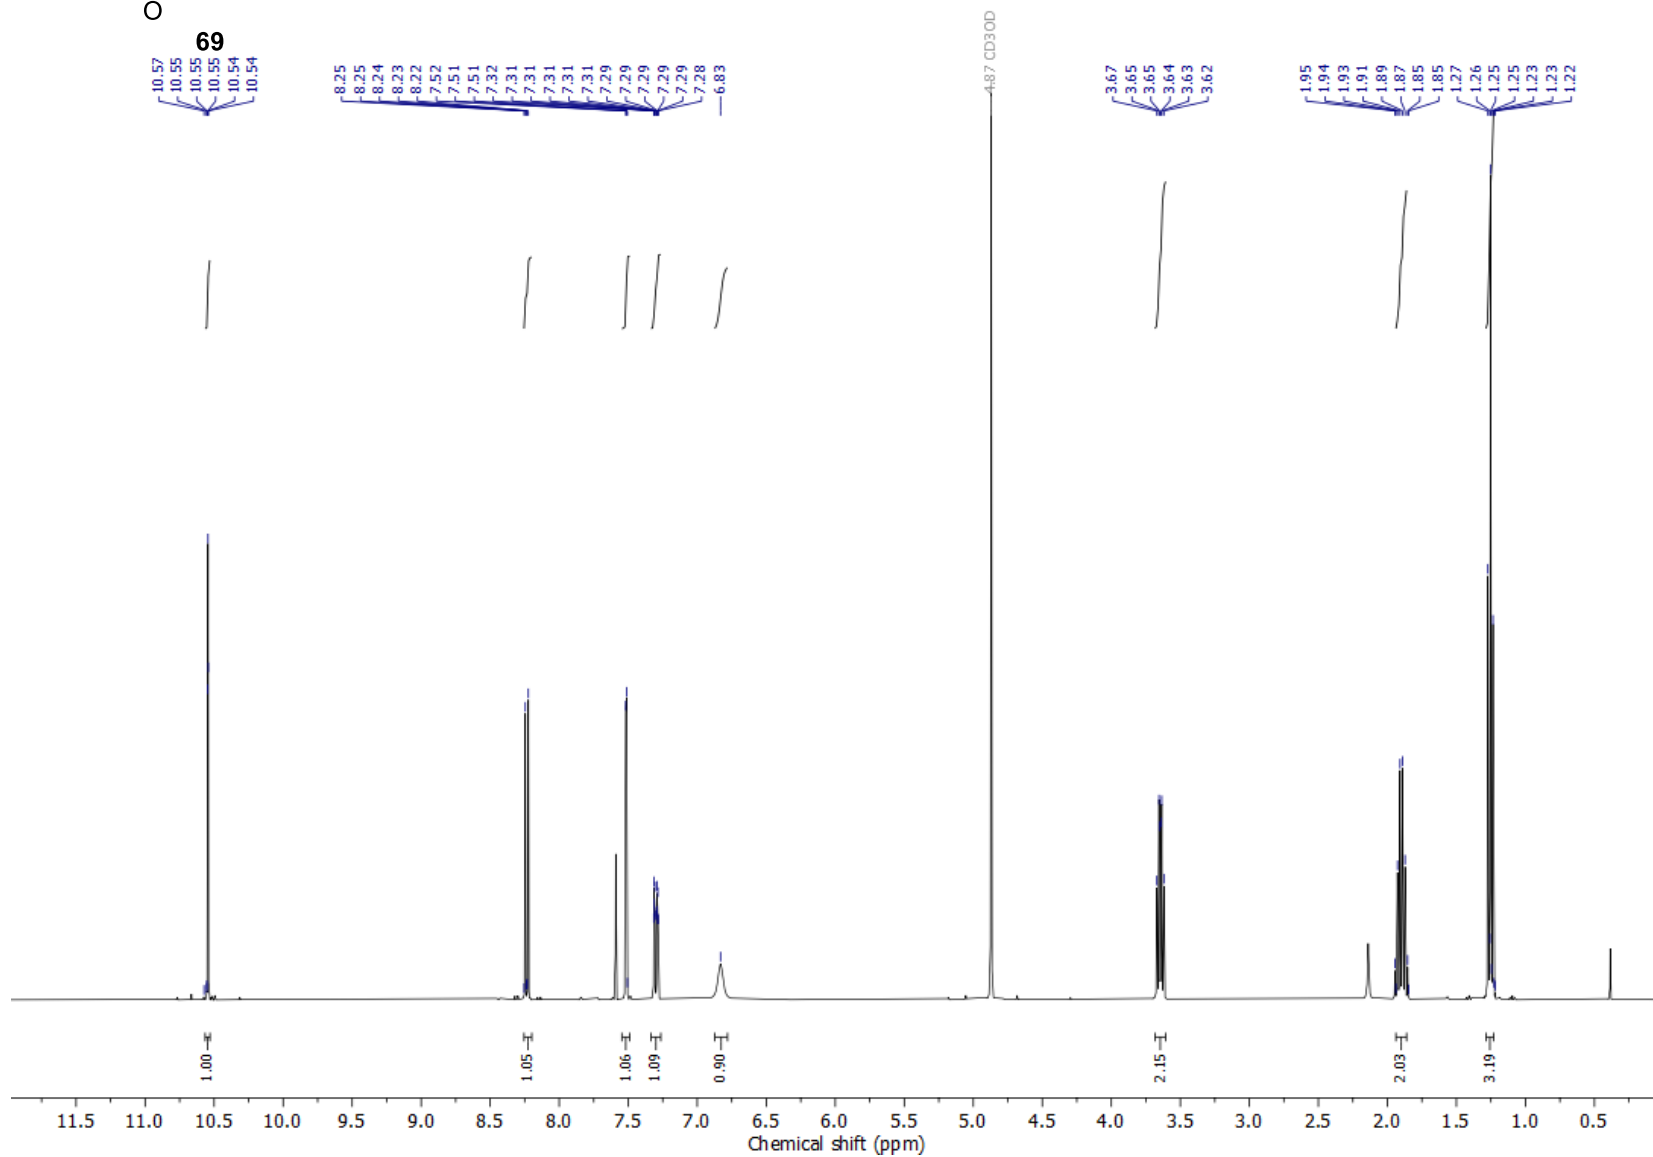

# $^{13}\text{C}$ NMR (100 MHz, $\text{CDCl}_3$ )

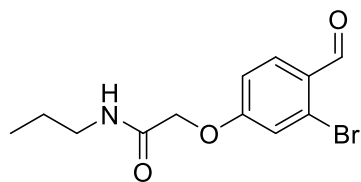

69

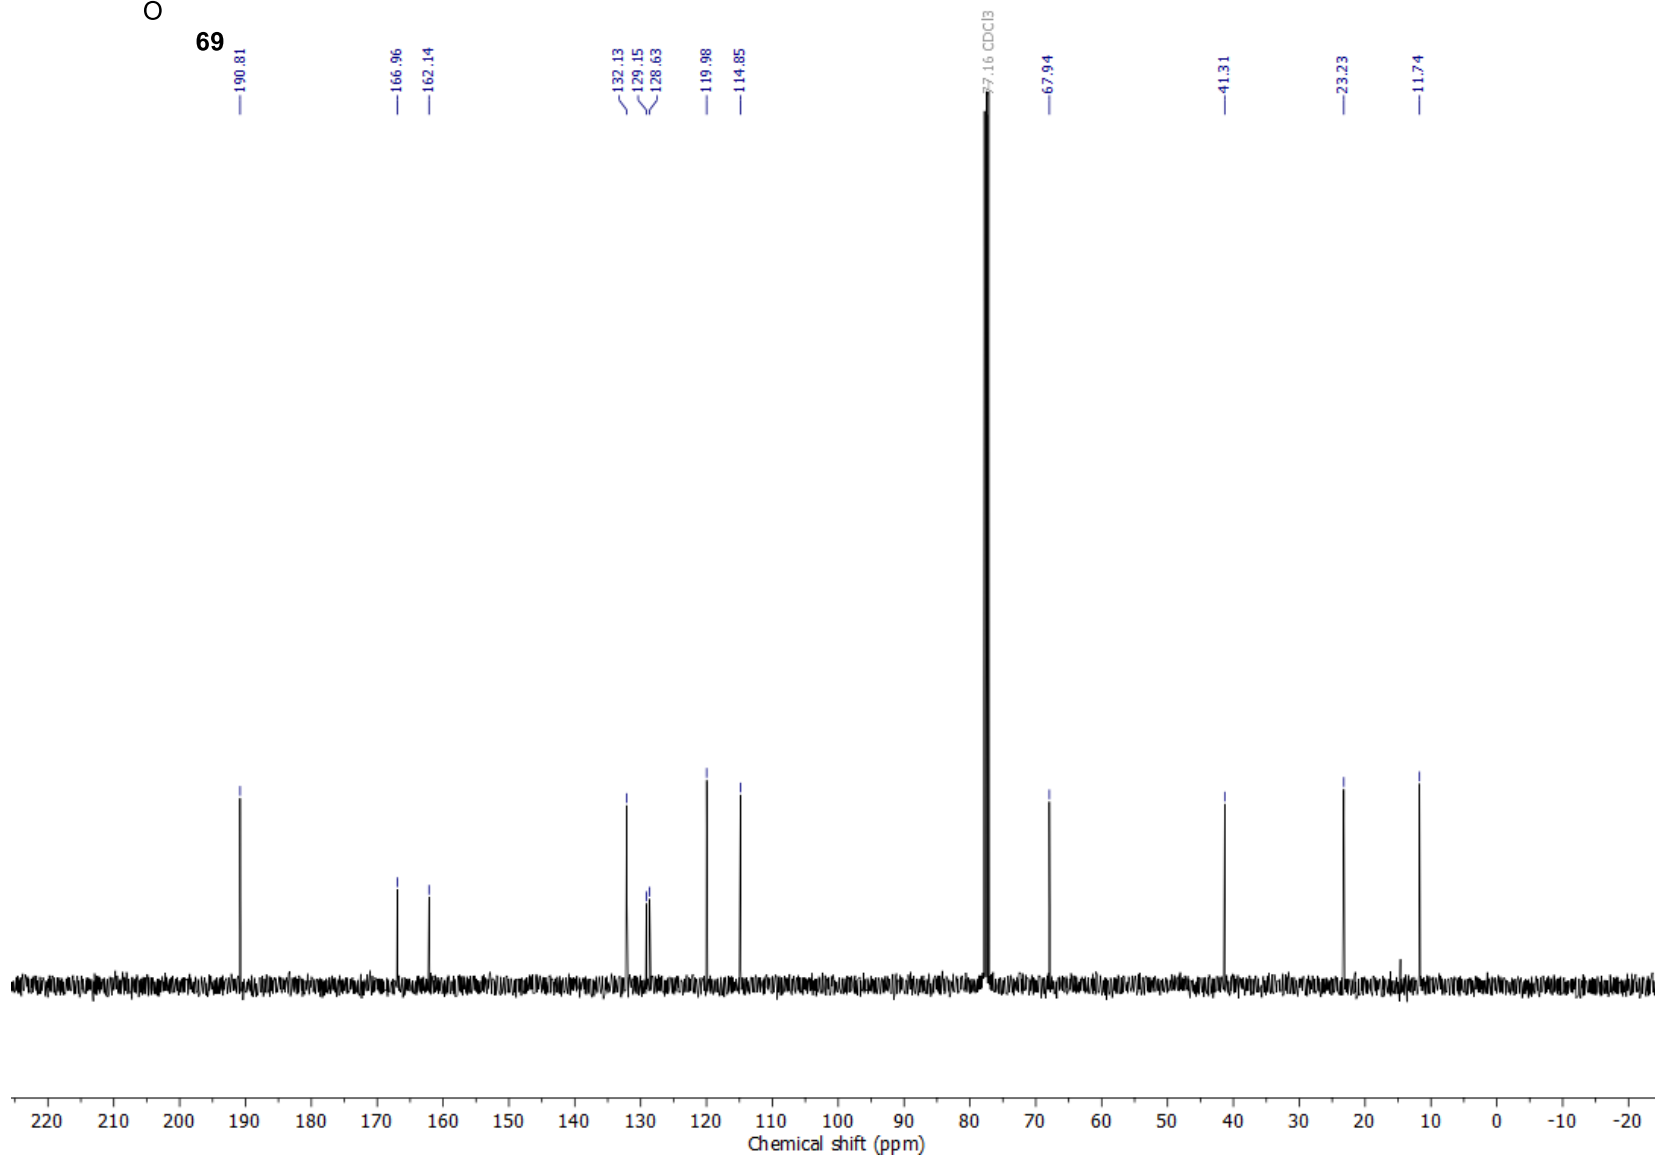

# $^1\text{H}$ NMR (400 MHz, $\text{CDCl}_3$ )

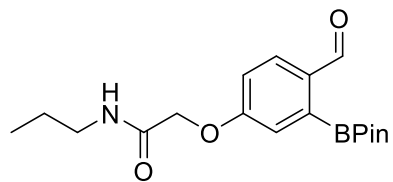

**70**

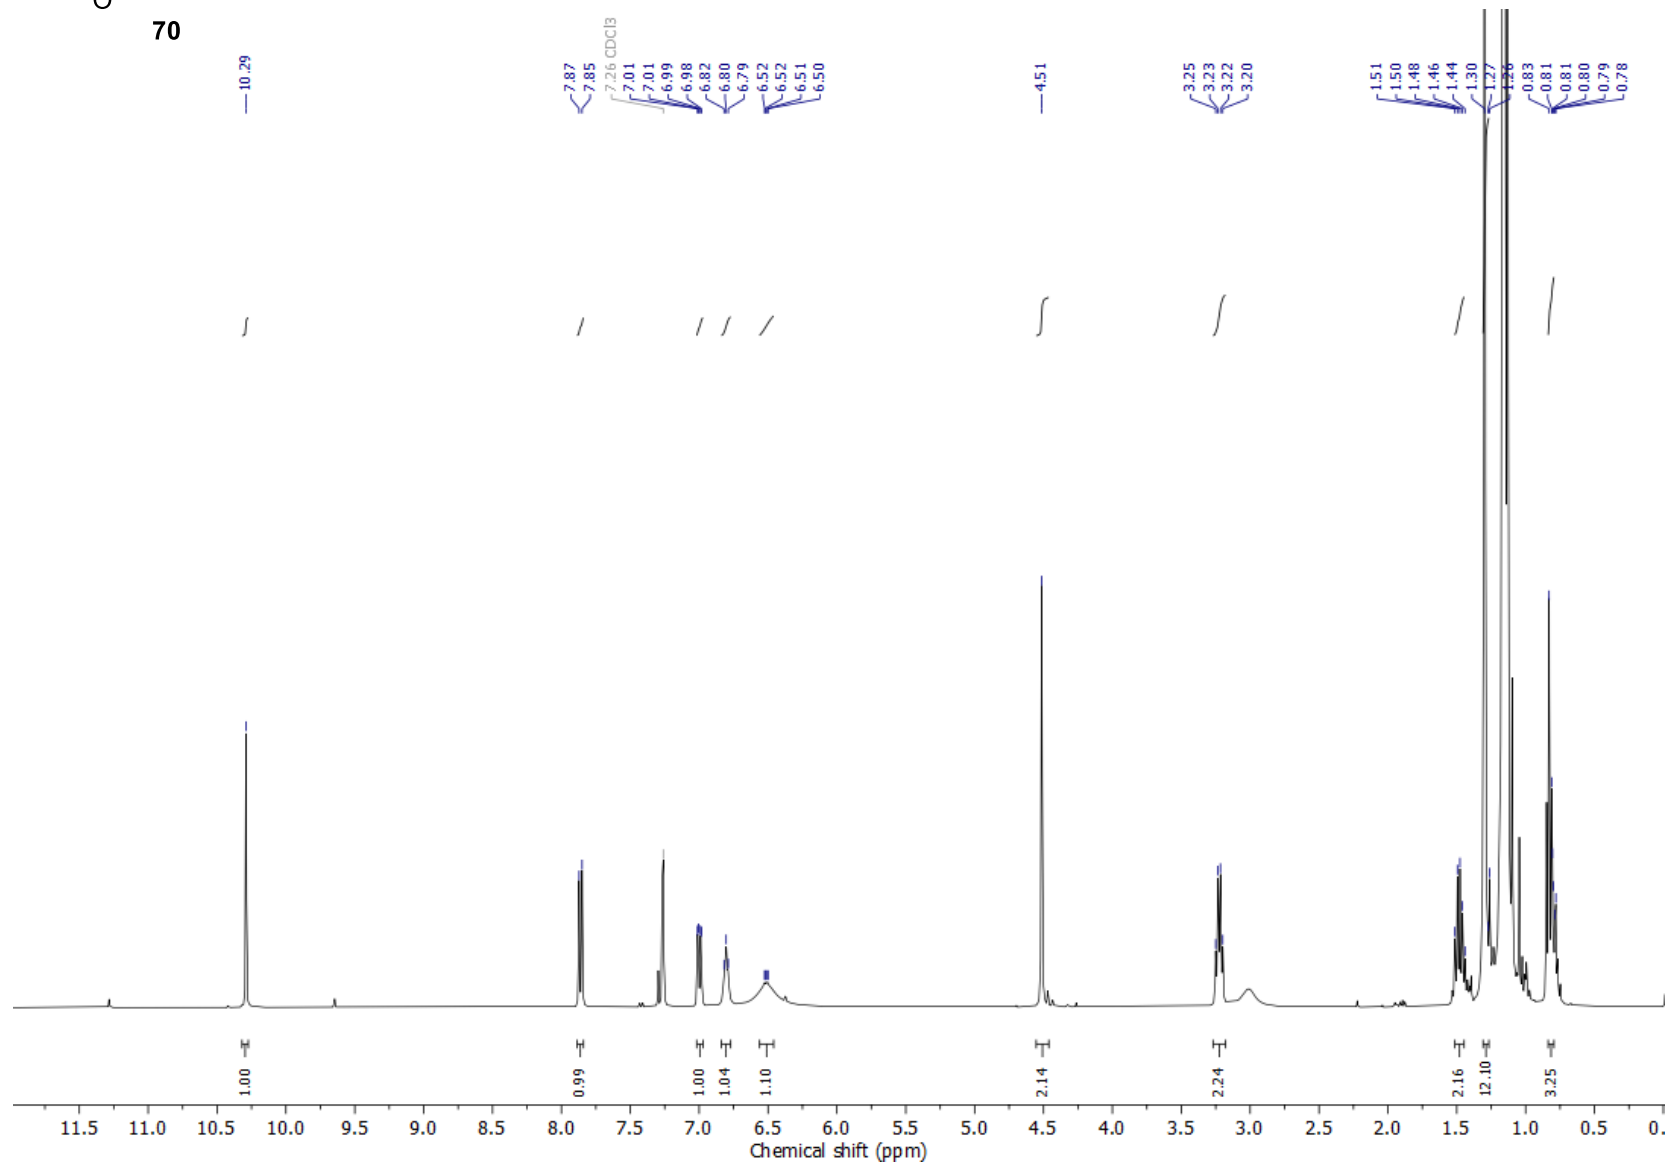

# $^{13}\text{C}$ NMR (100 MHz, $\text{CDCl}_3$ )

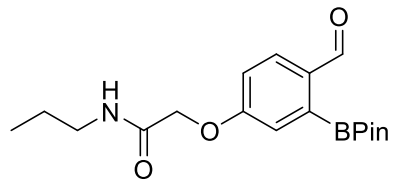

70

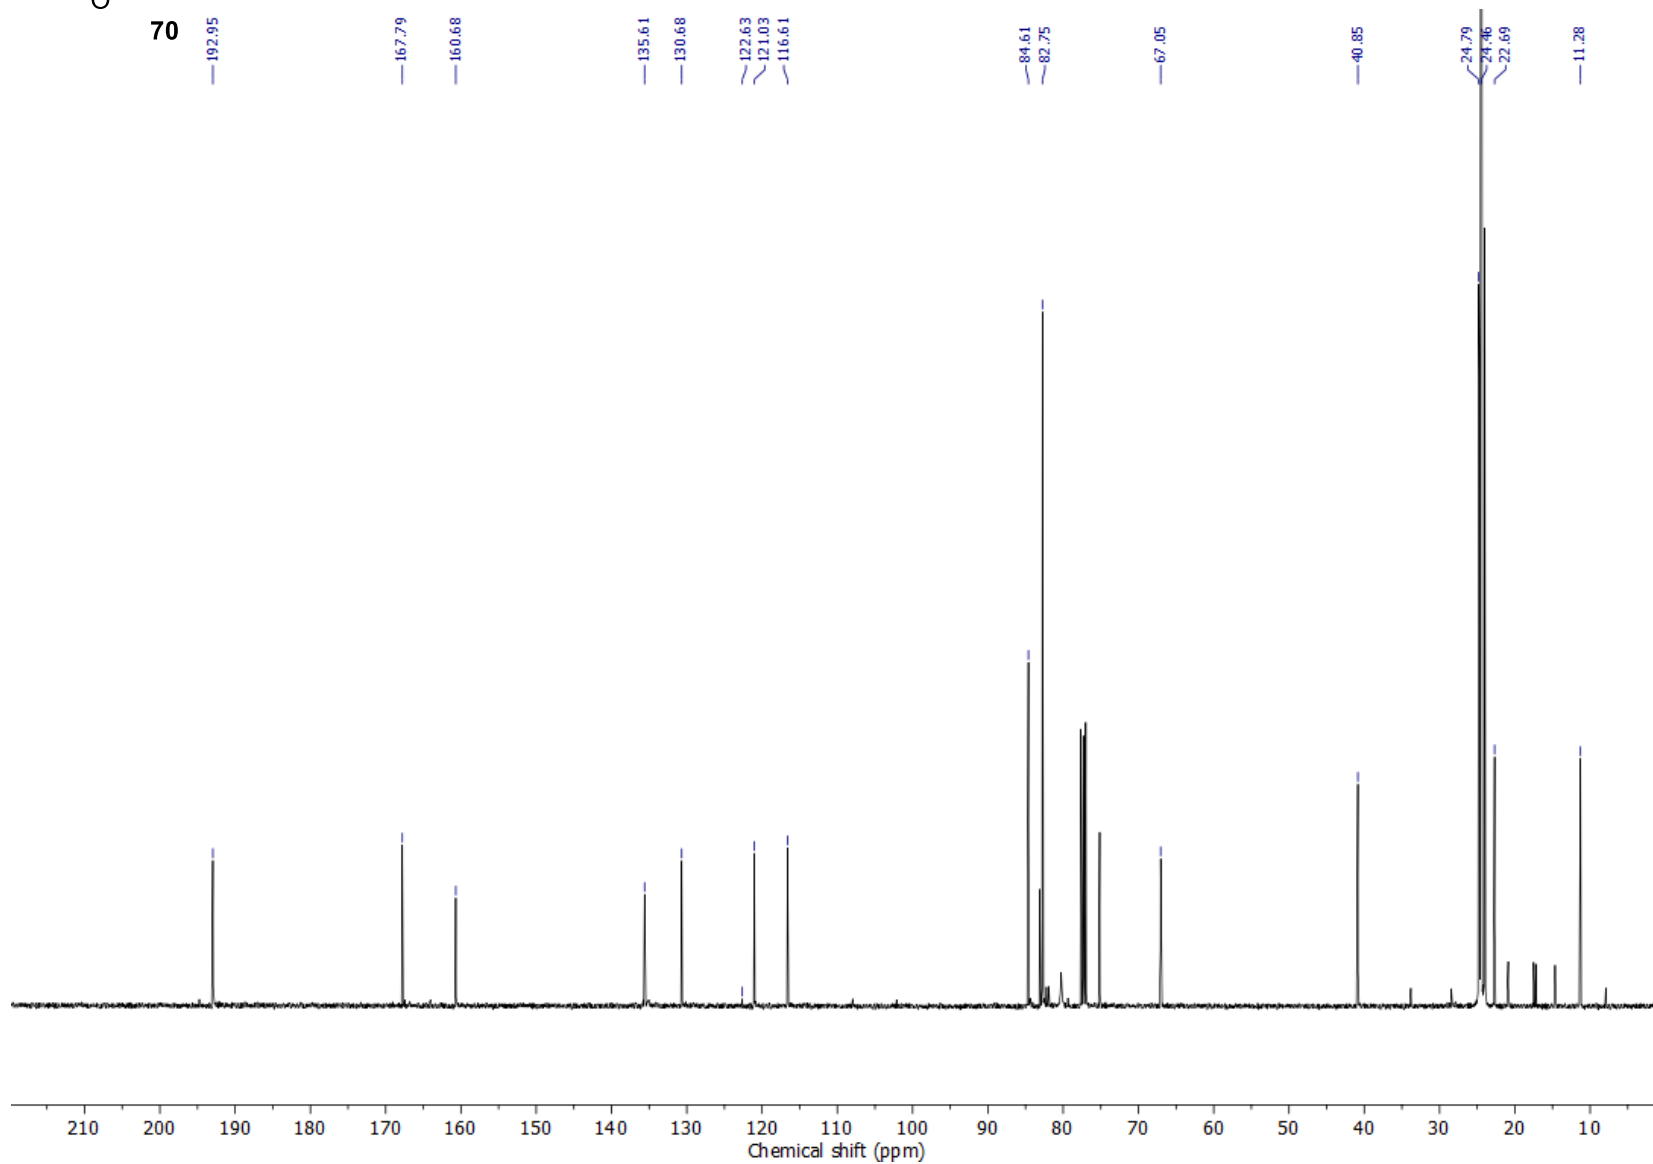

# $^1\text{H}$ NMR (400 MHz, $\text{CDCl}_3$ )

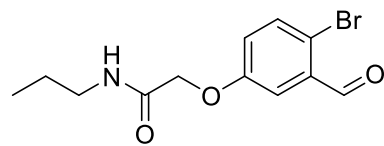

71

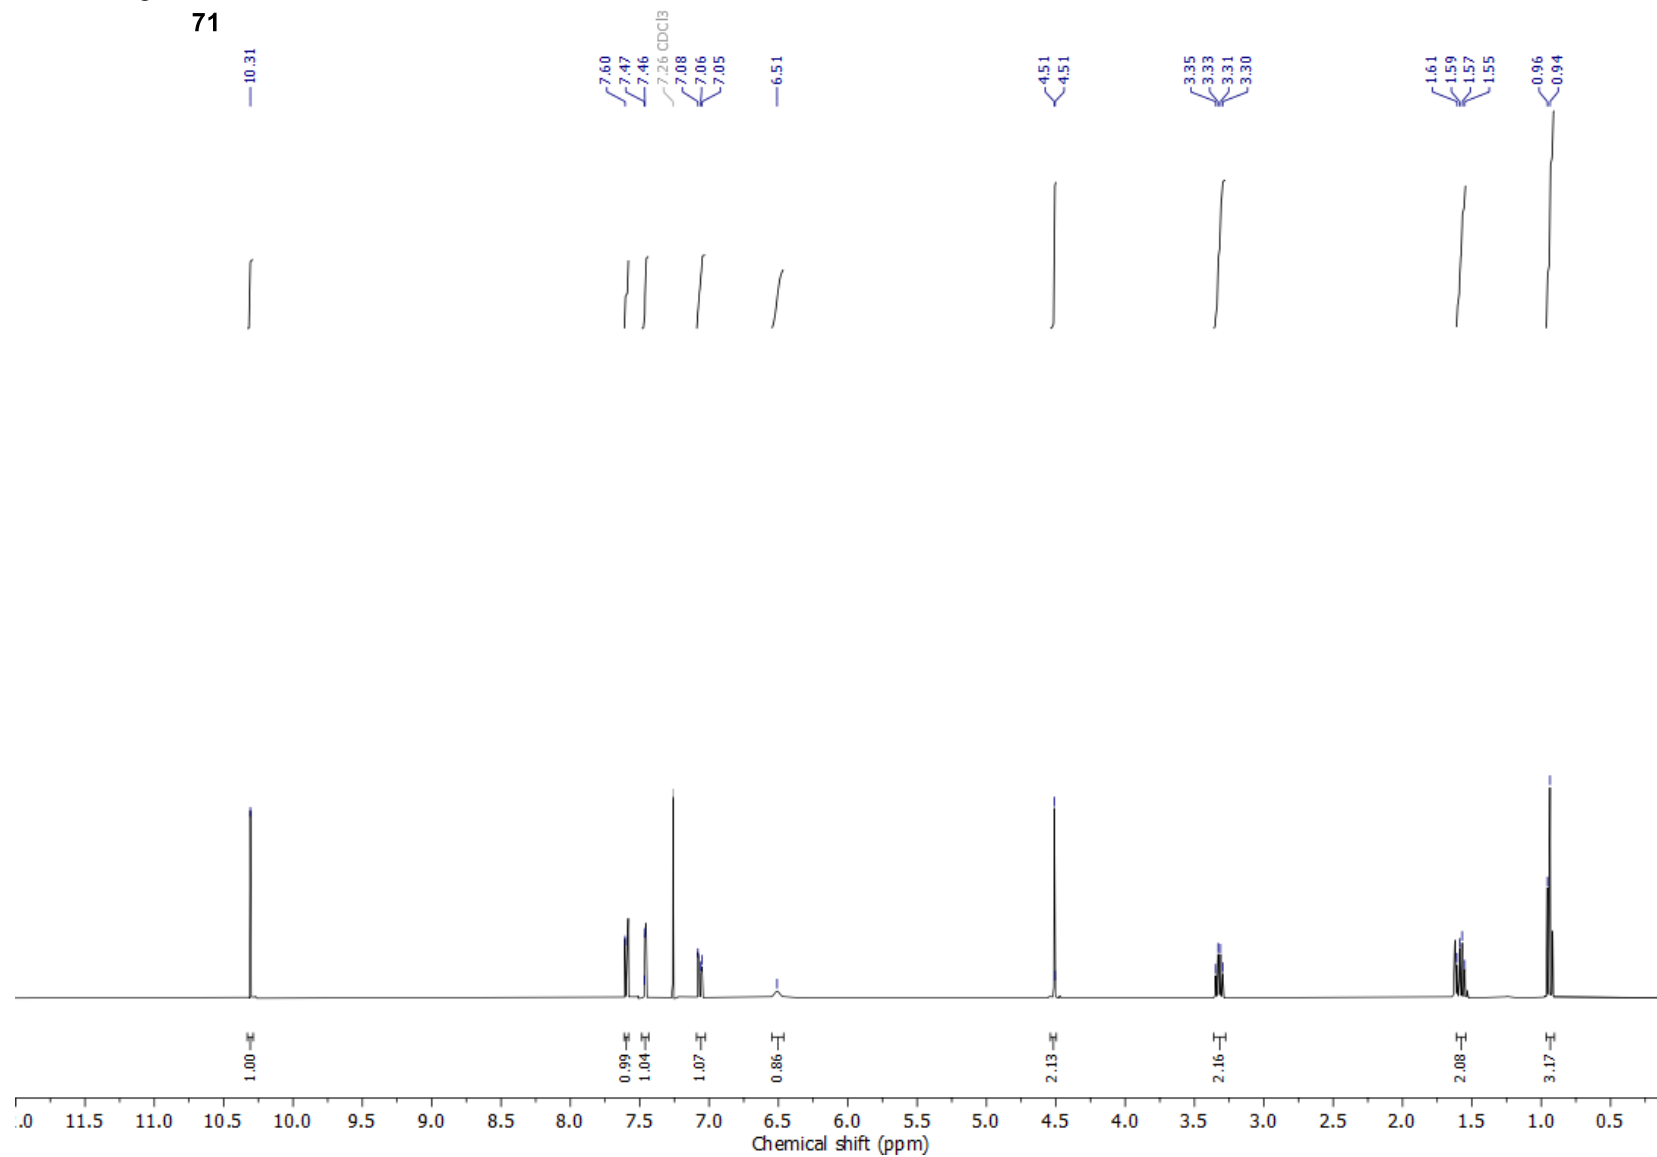

# $^{13}\text{C}$ NMR (100 MHz, $\text{CDCl}_3$ )

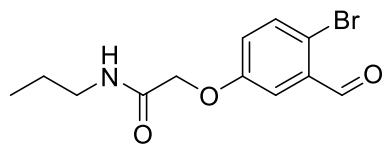

71

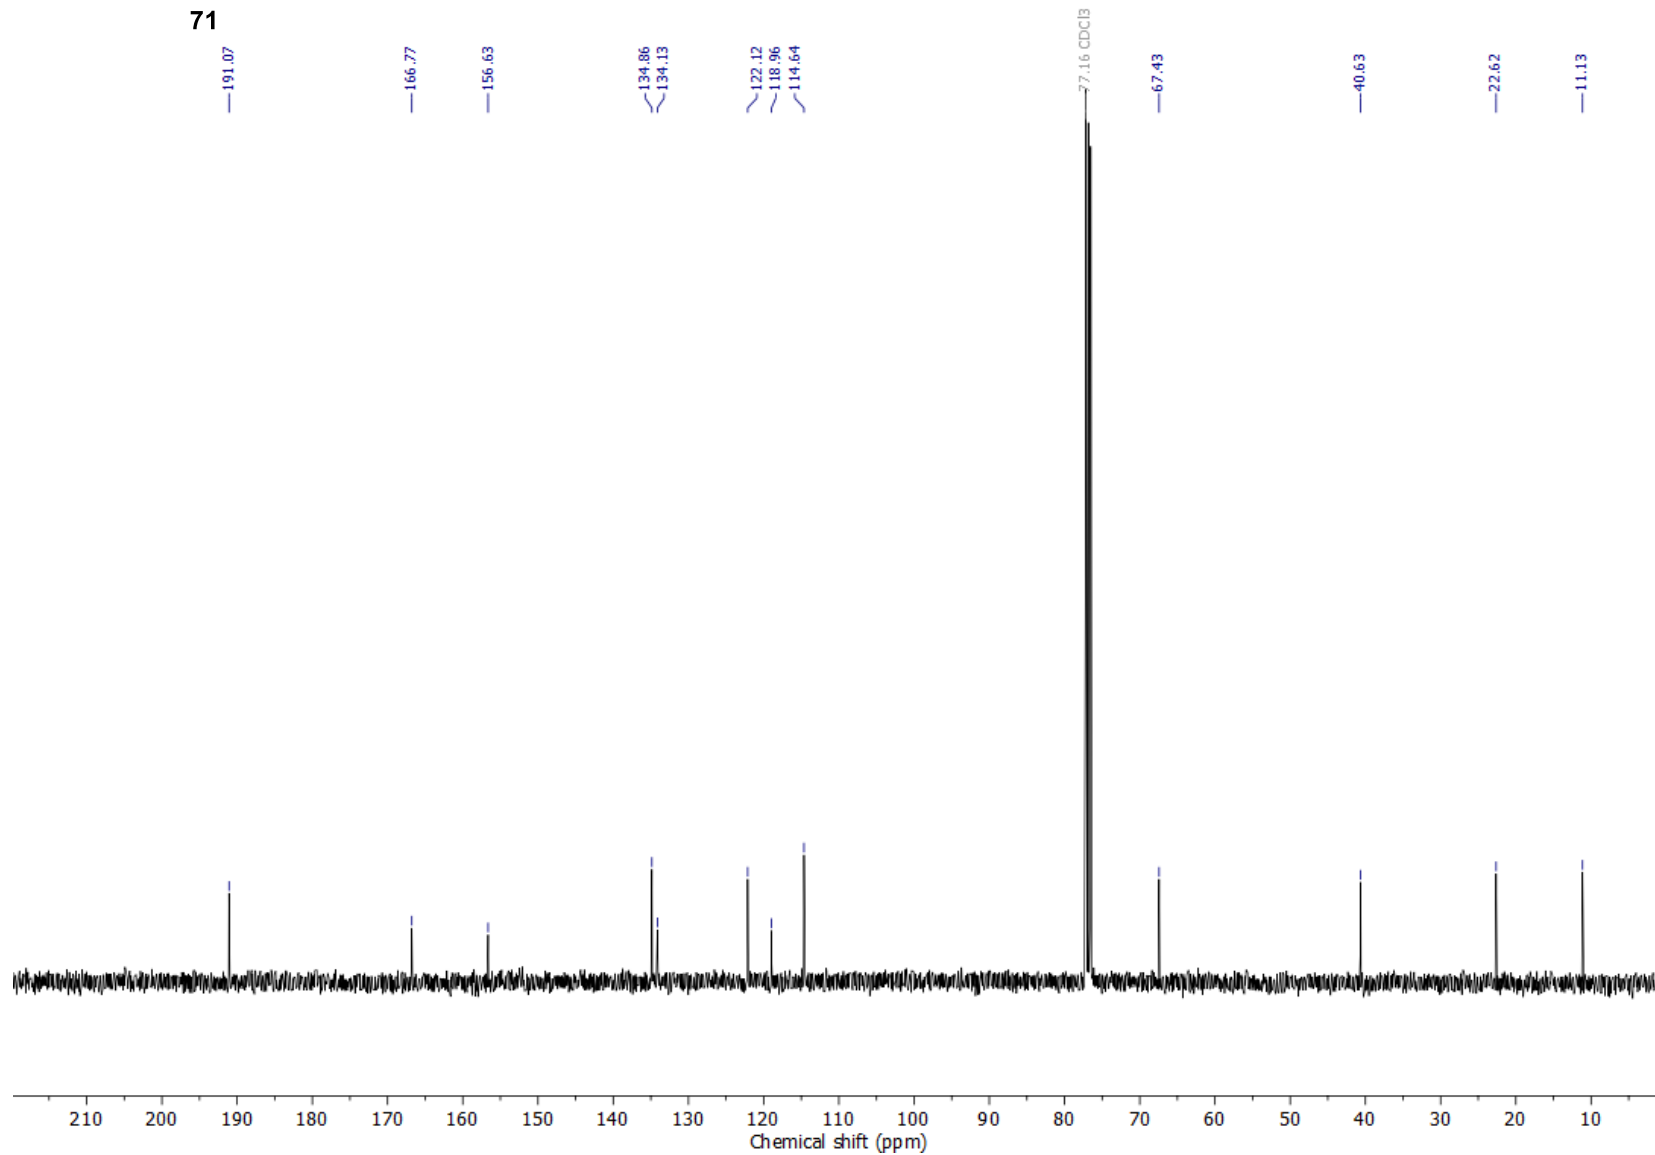

# $^1\text{H}$ NMR (400 MHz, $\text{CDCl}_3$ )

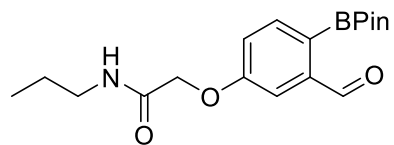

72

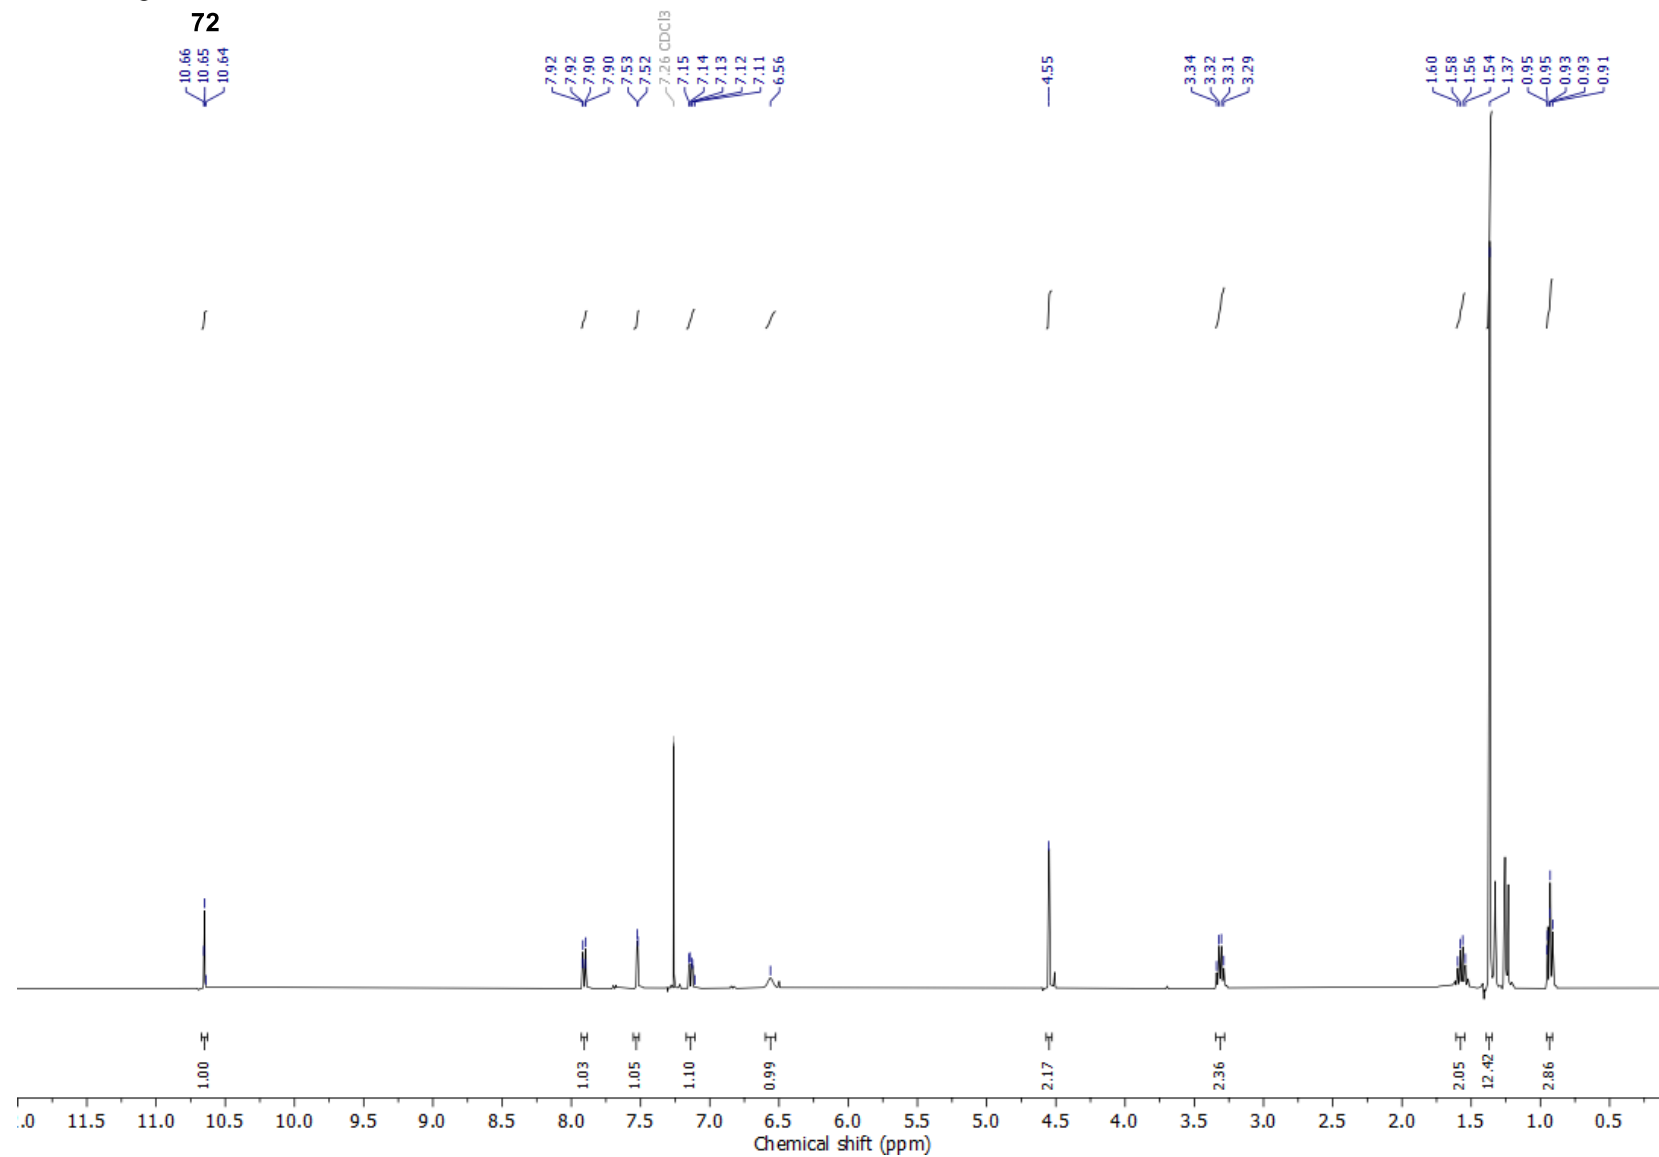

# $^{13}\text{C}$ NMR (100 MHz, $\text{CDCl}_3$ )

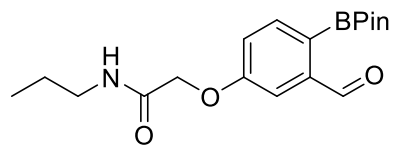

72

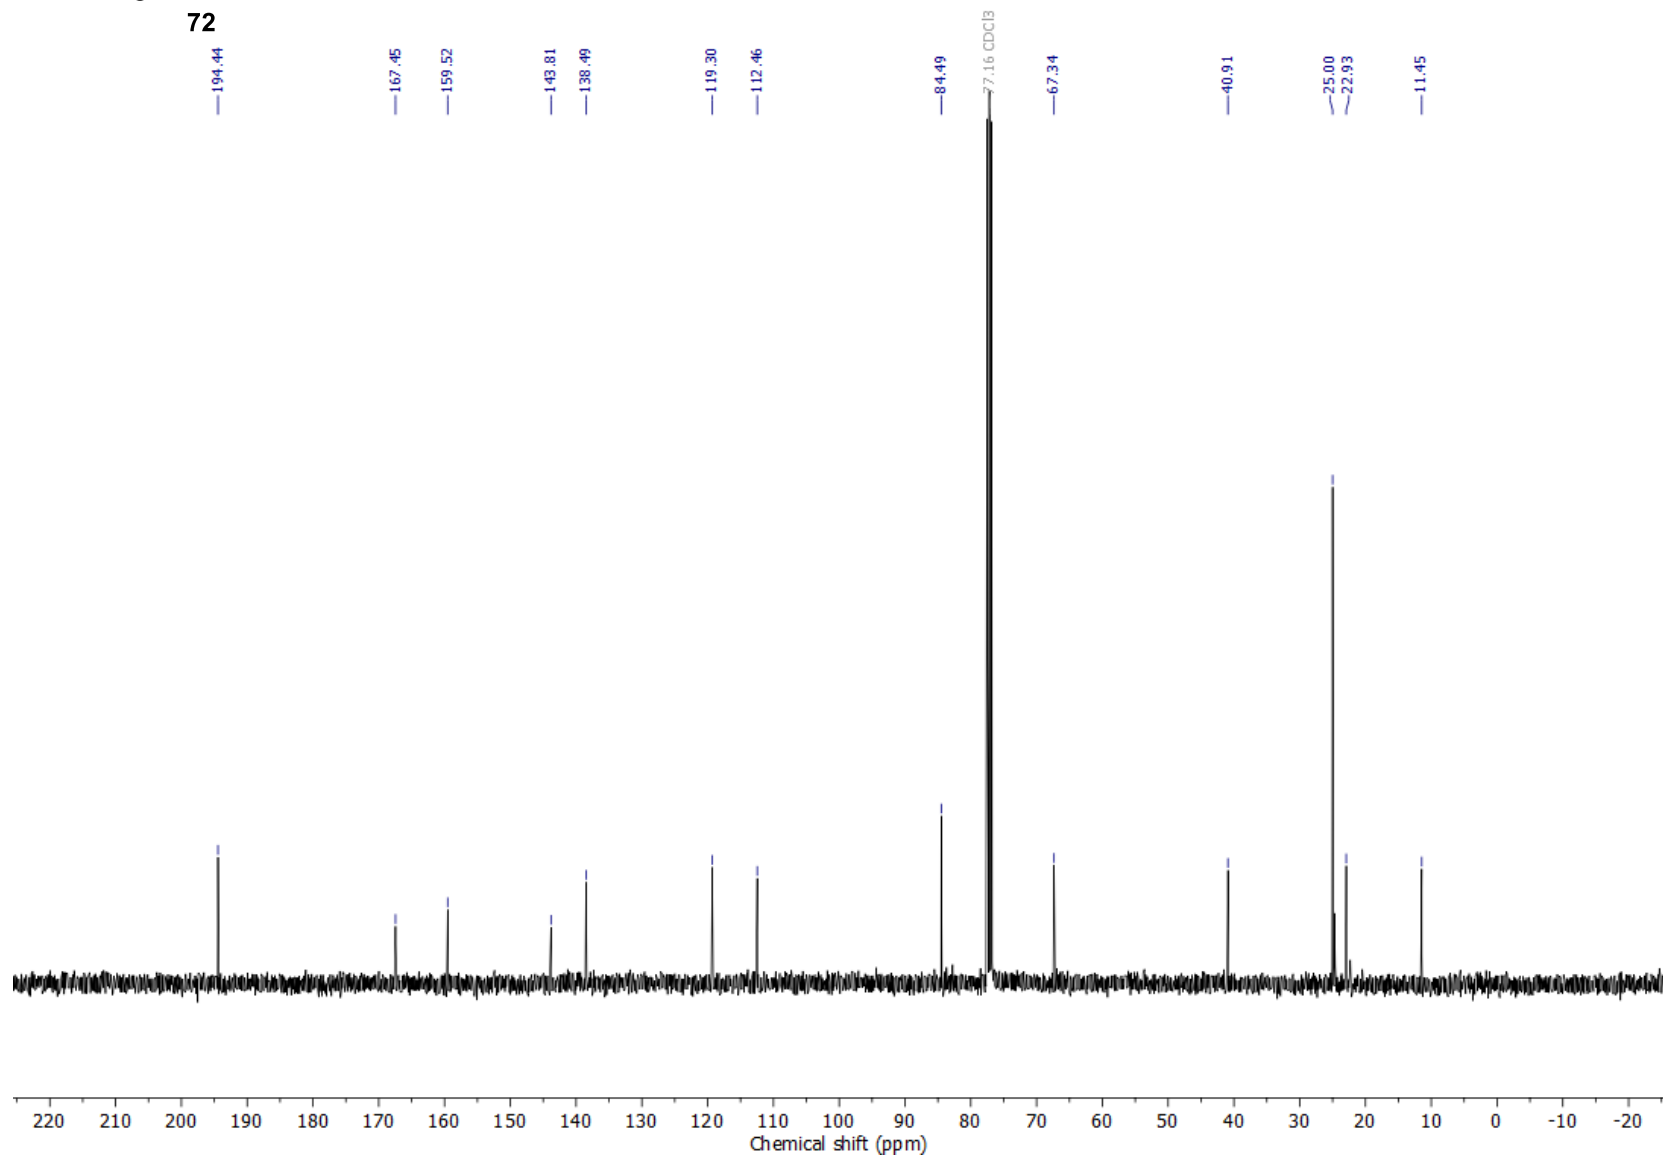

# $^1\text{H}$ NMR (400 MHz, MeOD)

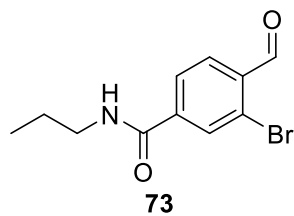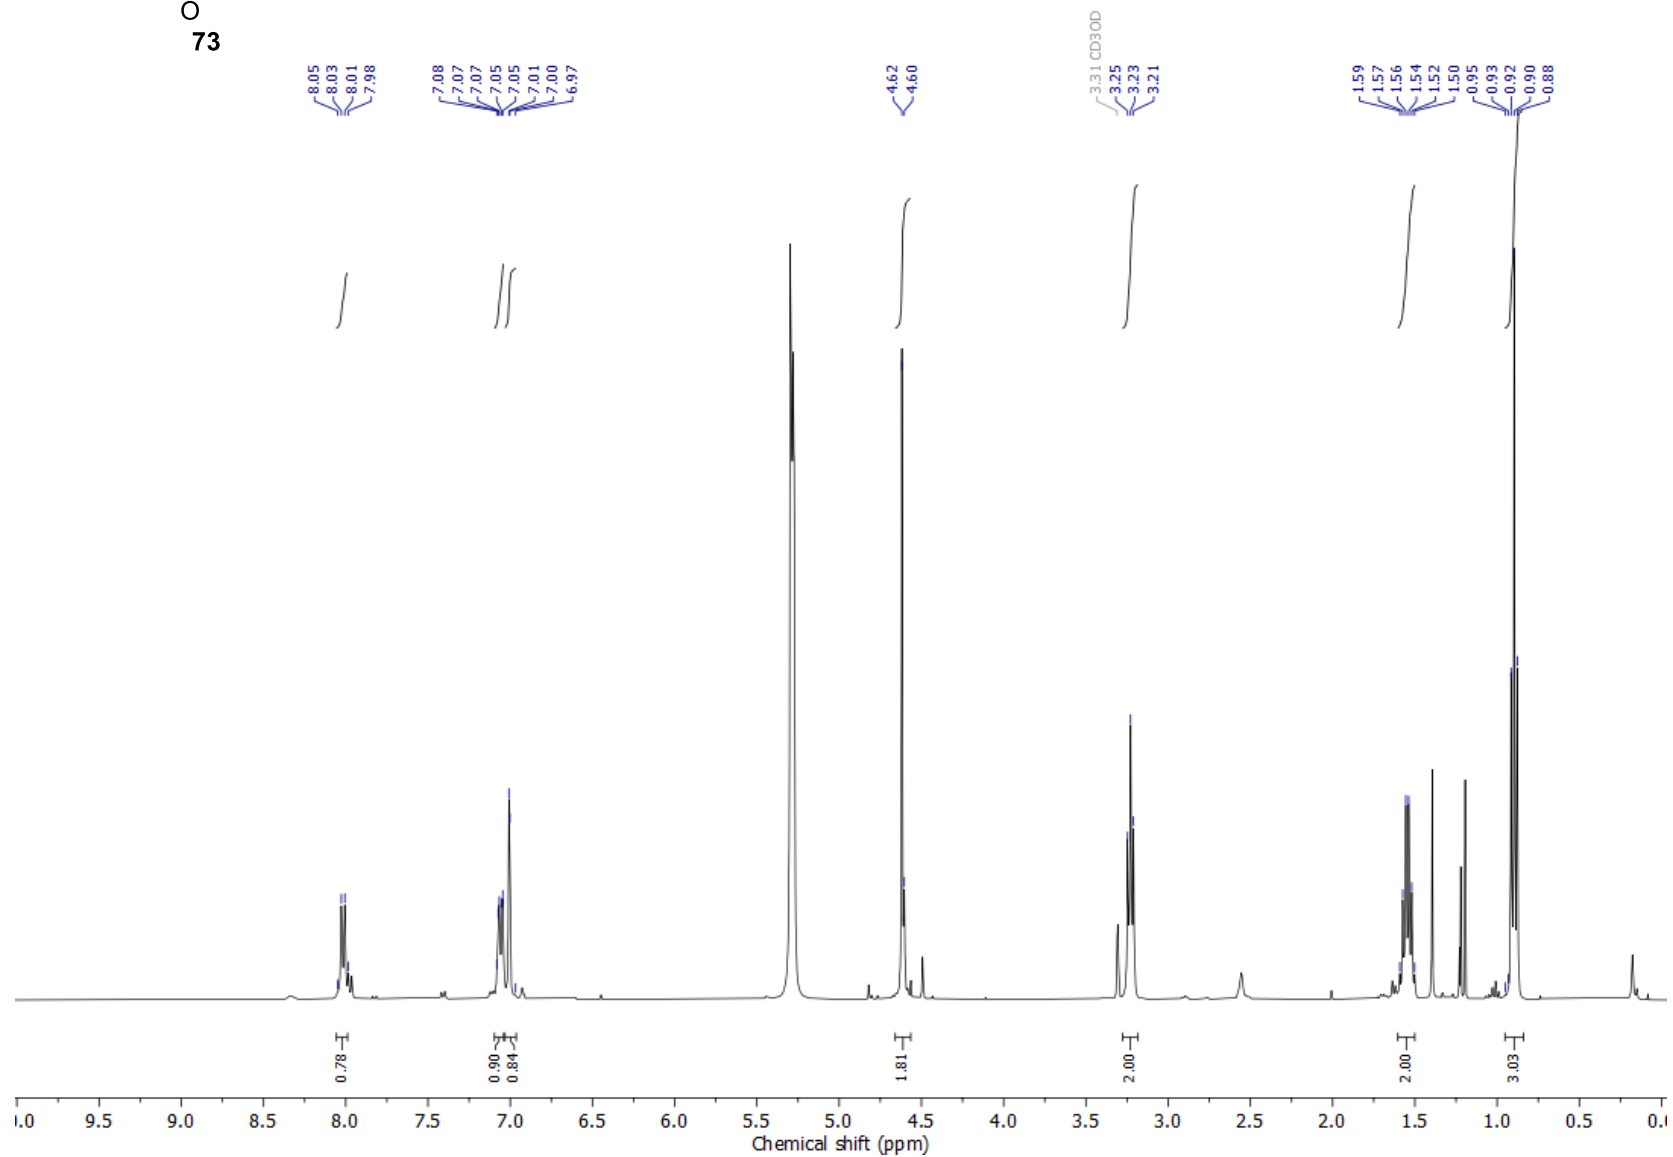

# $^{13}\text{C}$ NMR (100 MHz, MeOD)

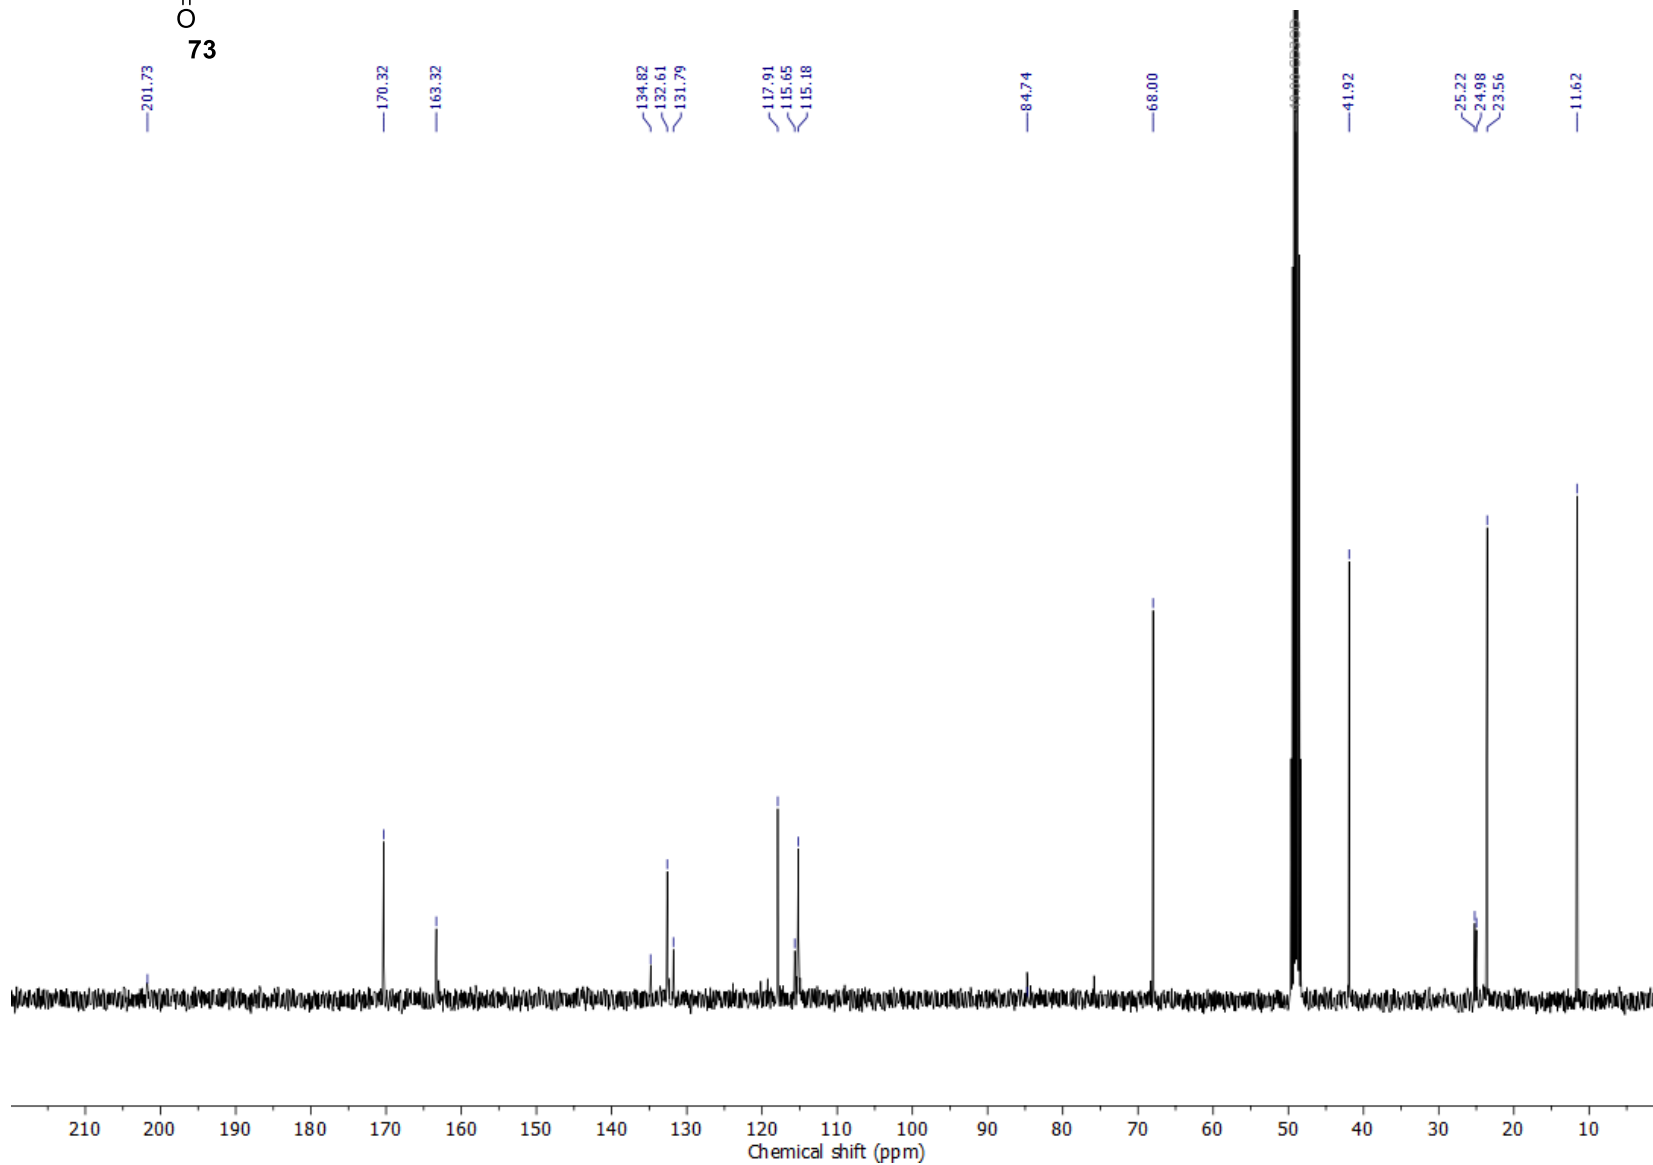

# $^1\text{H}$ NMR (400 MHz, $\text{CDCl}_3$ )

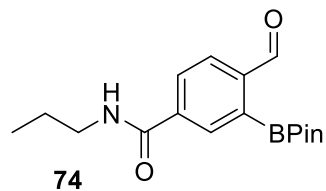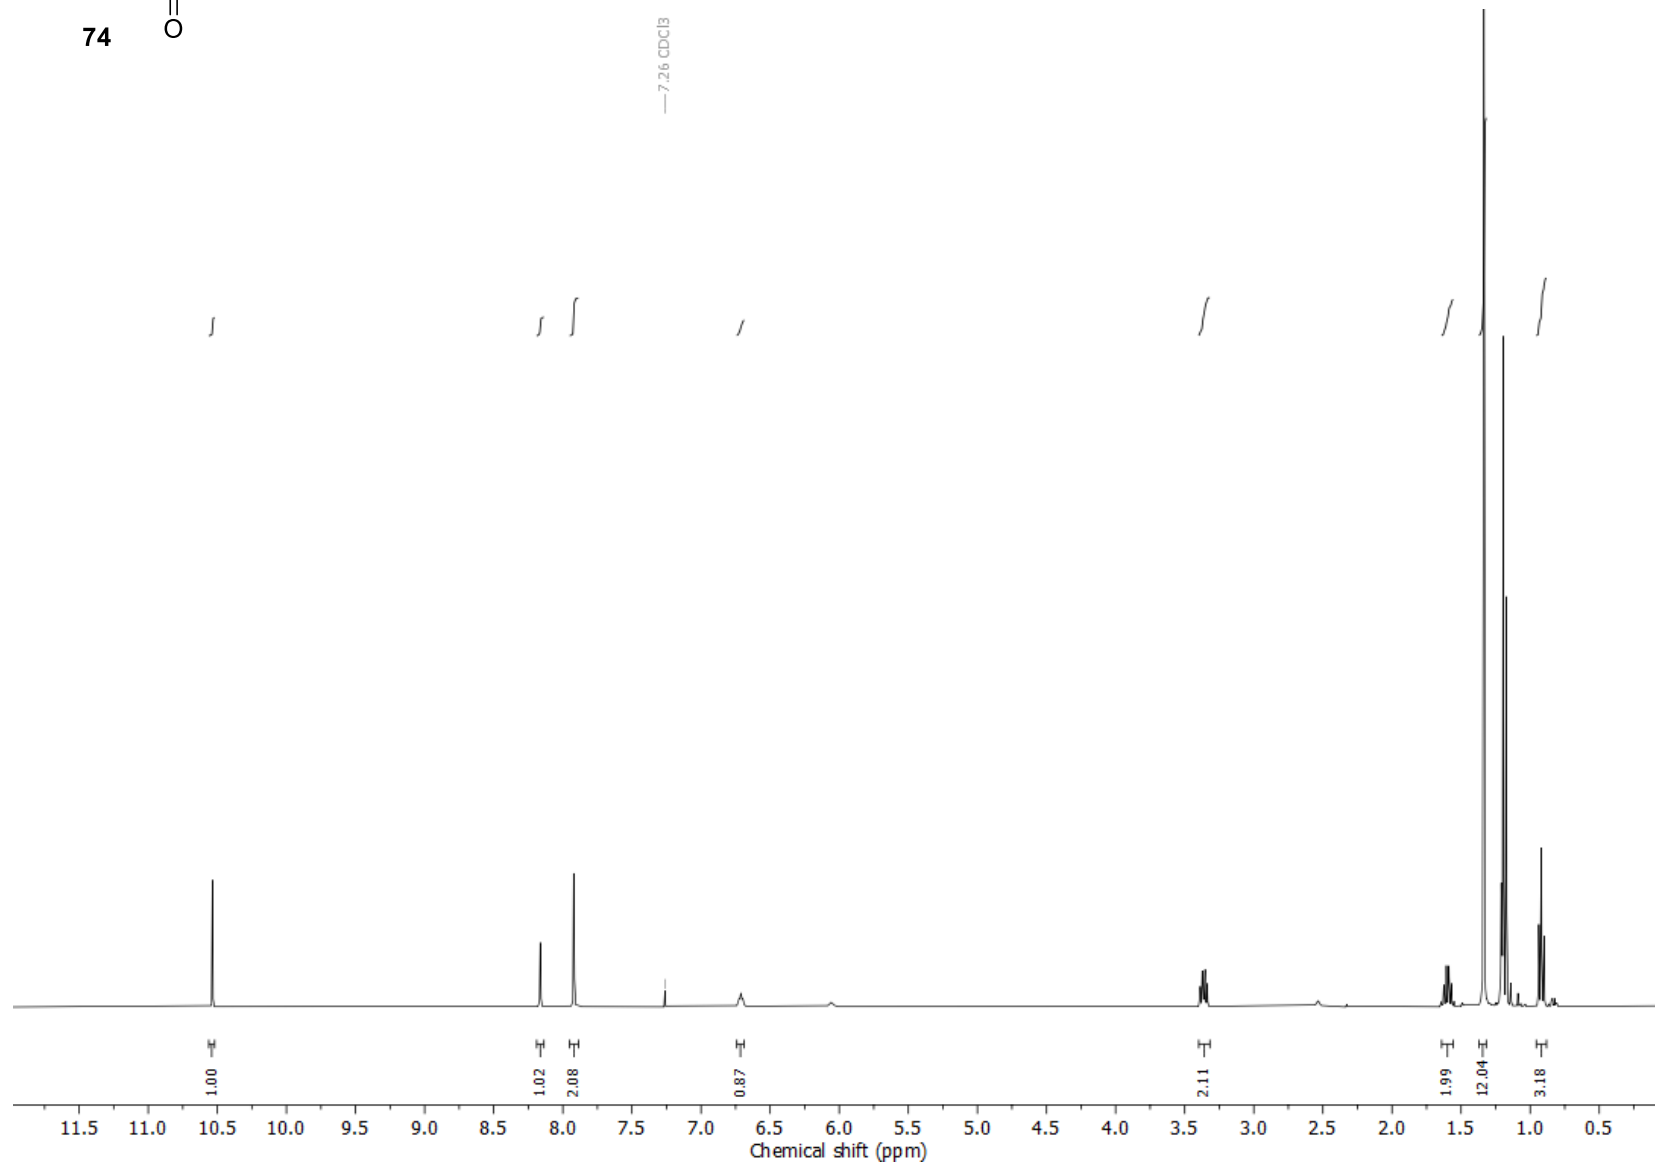

# $^{13}\text{C}$ NMR (100 MHz, $\text{CDCl}_3$ )

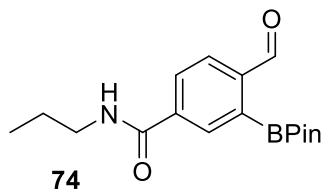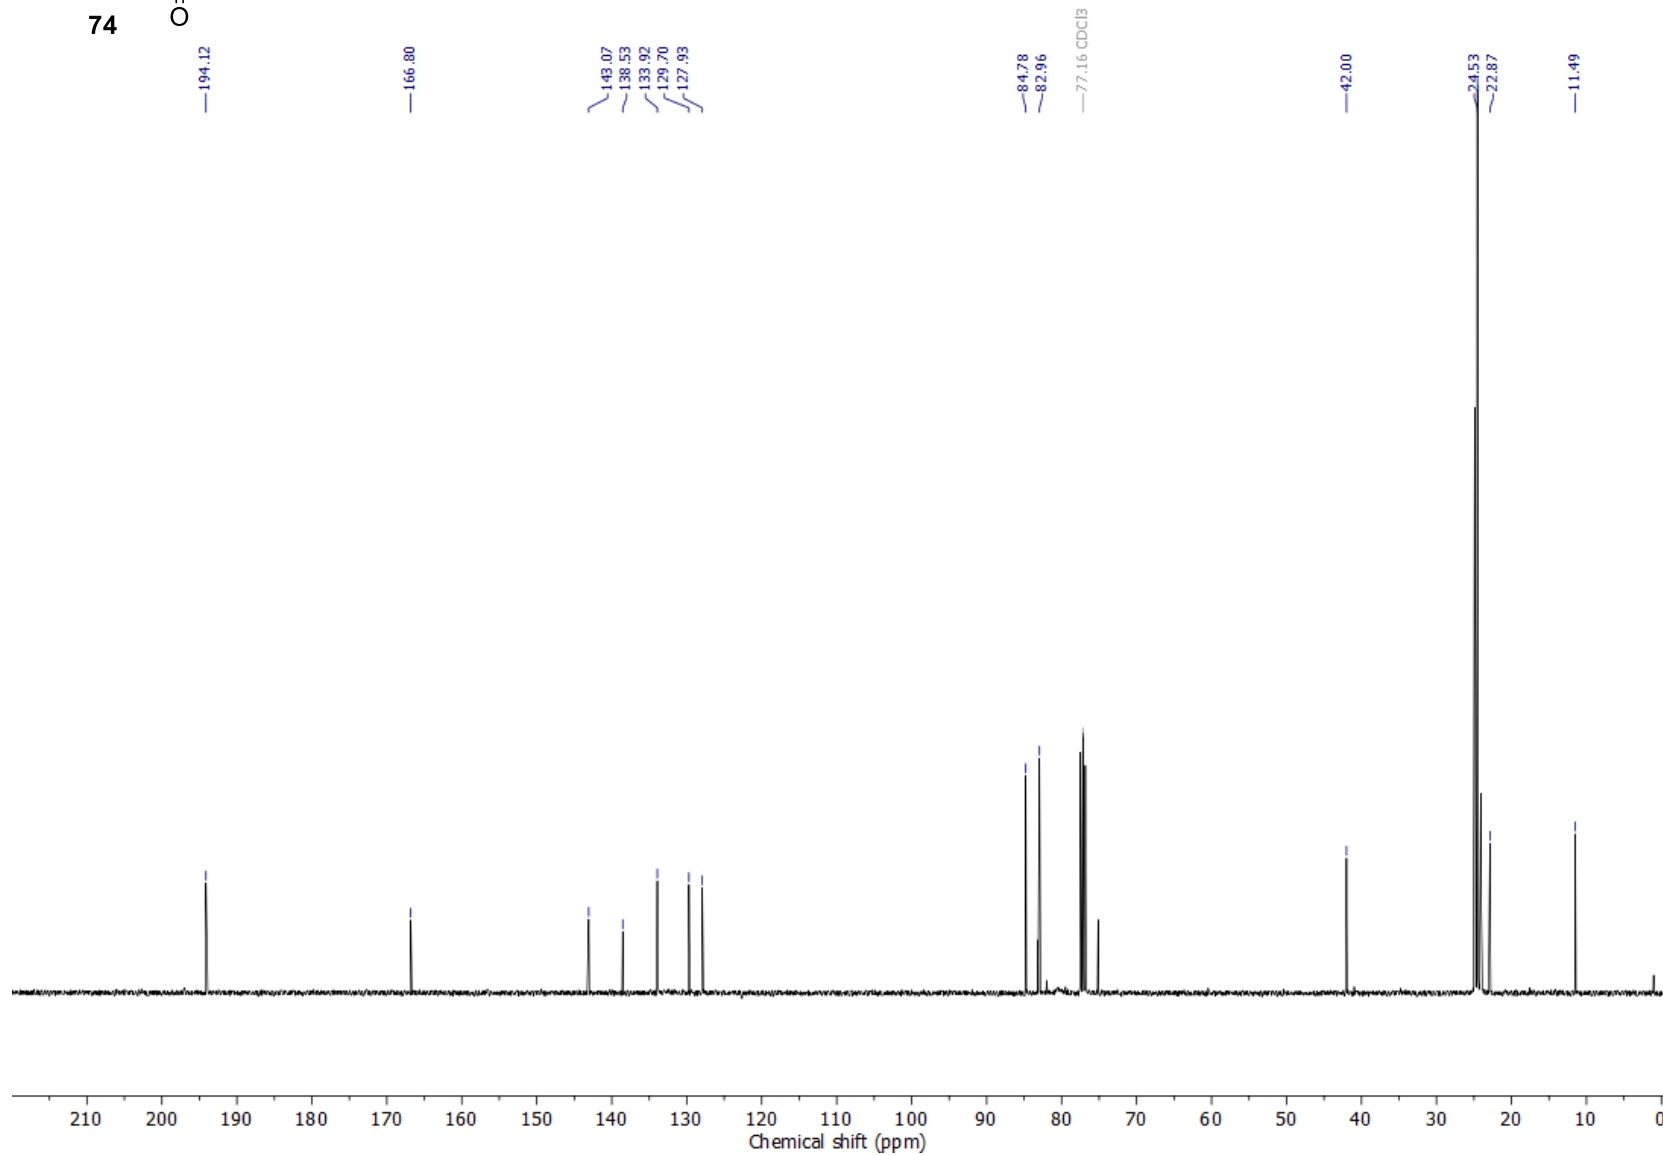

# $^1\text{H}$ NMR (400 MHz, $\text{CDCl}_3$ )

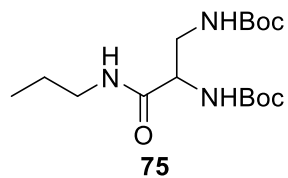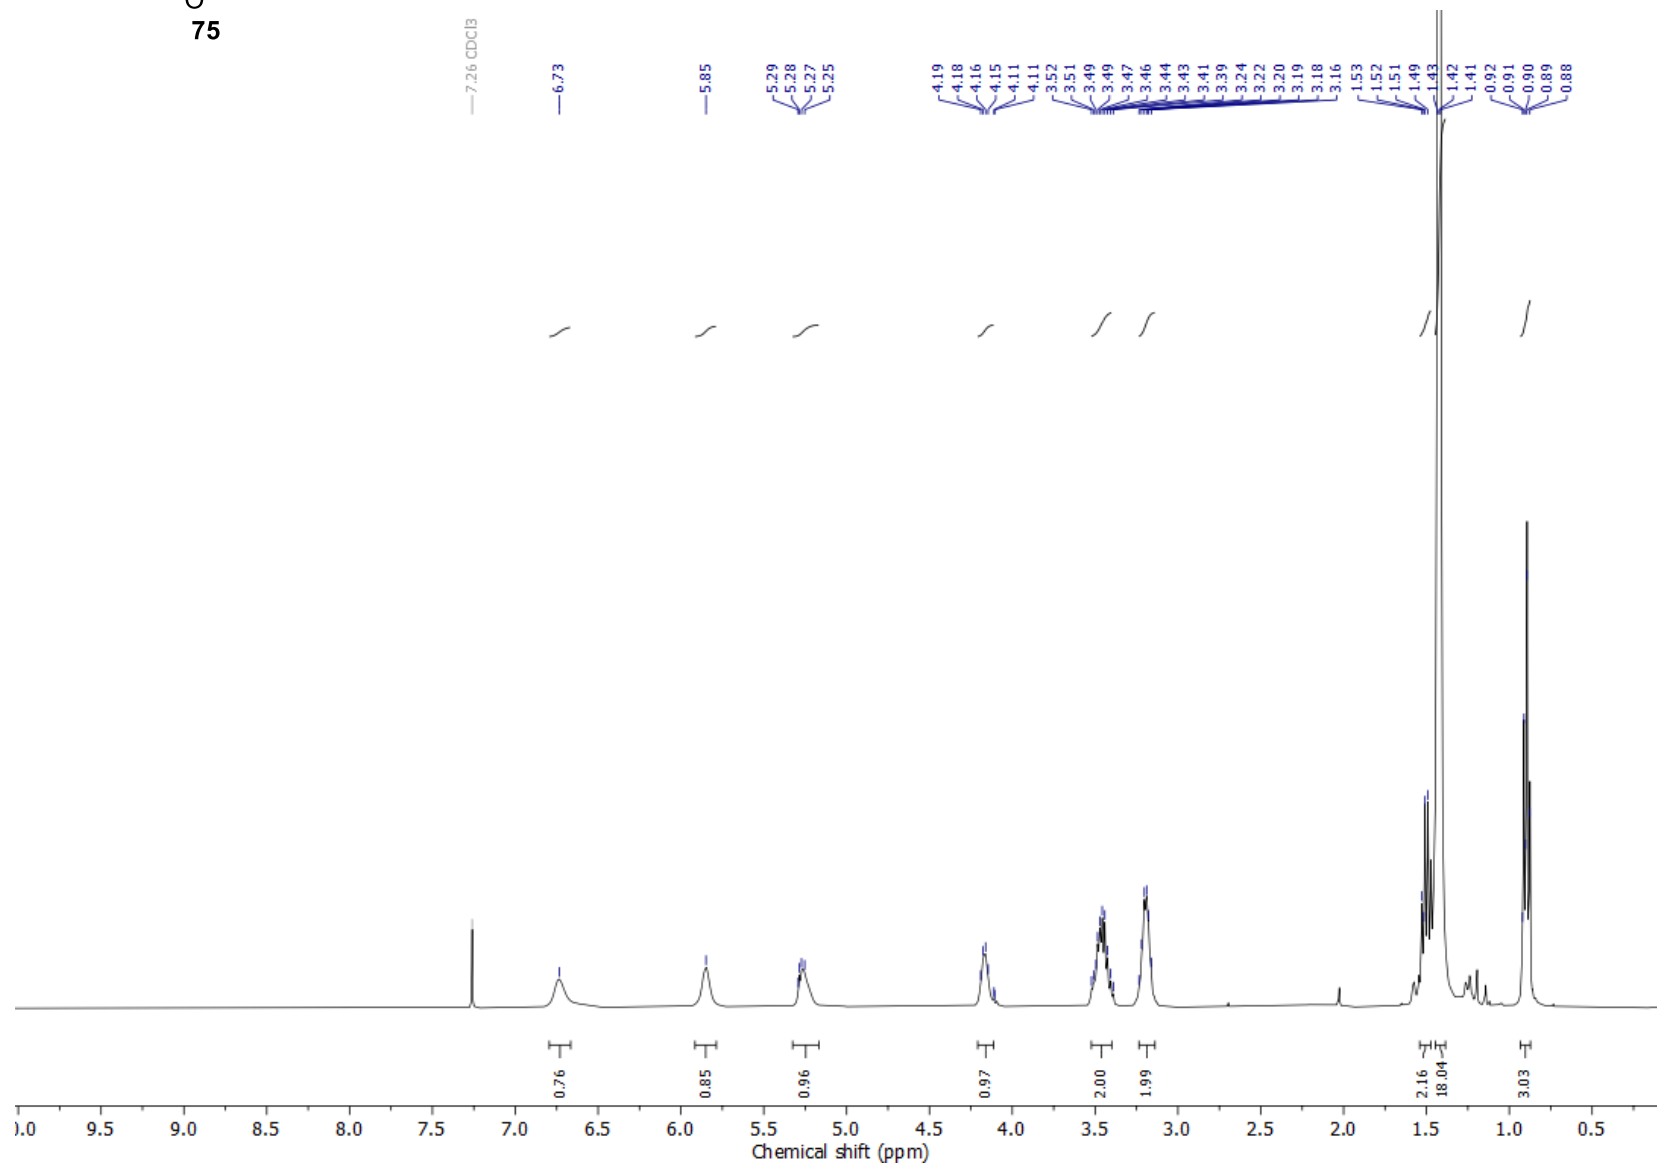

# $^{13}\text{C}$ NMR (100 MHz, $\text{CDCl}_3$ )

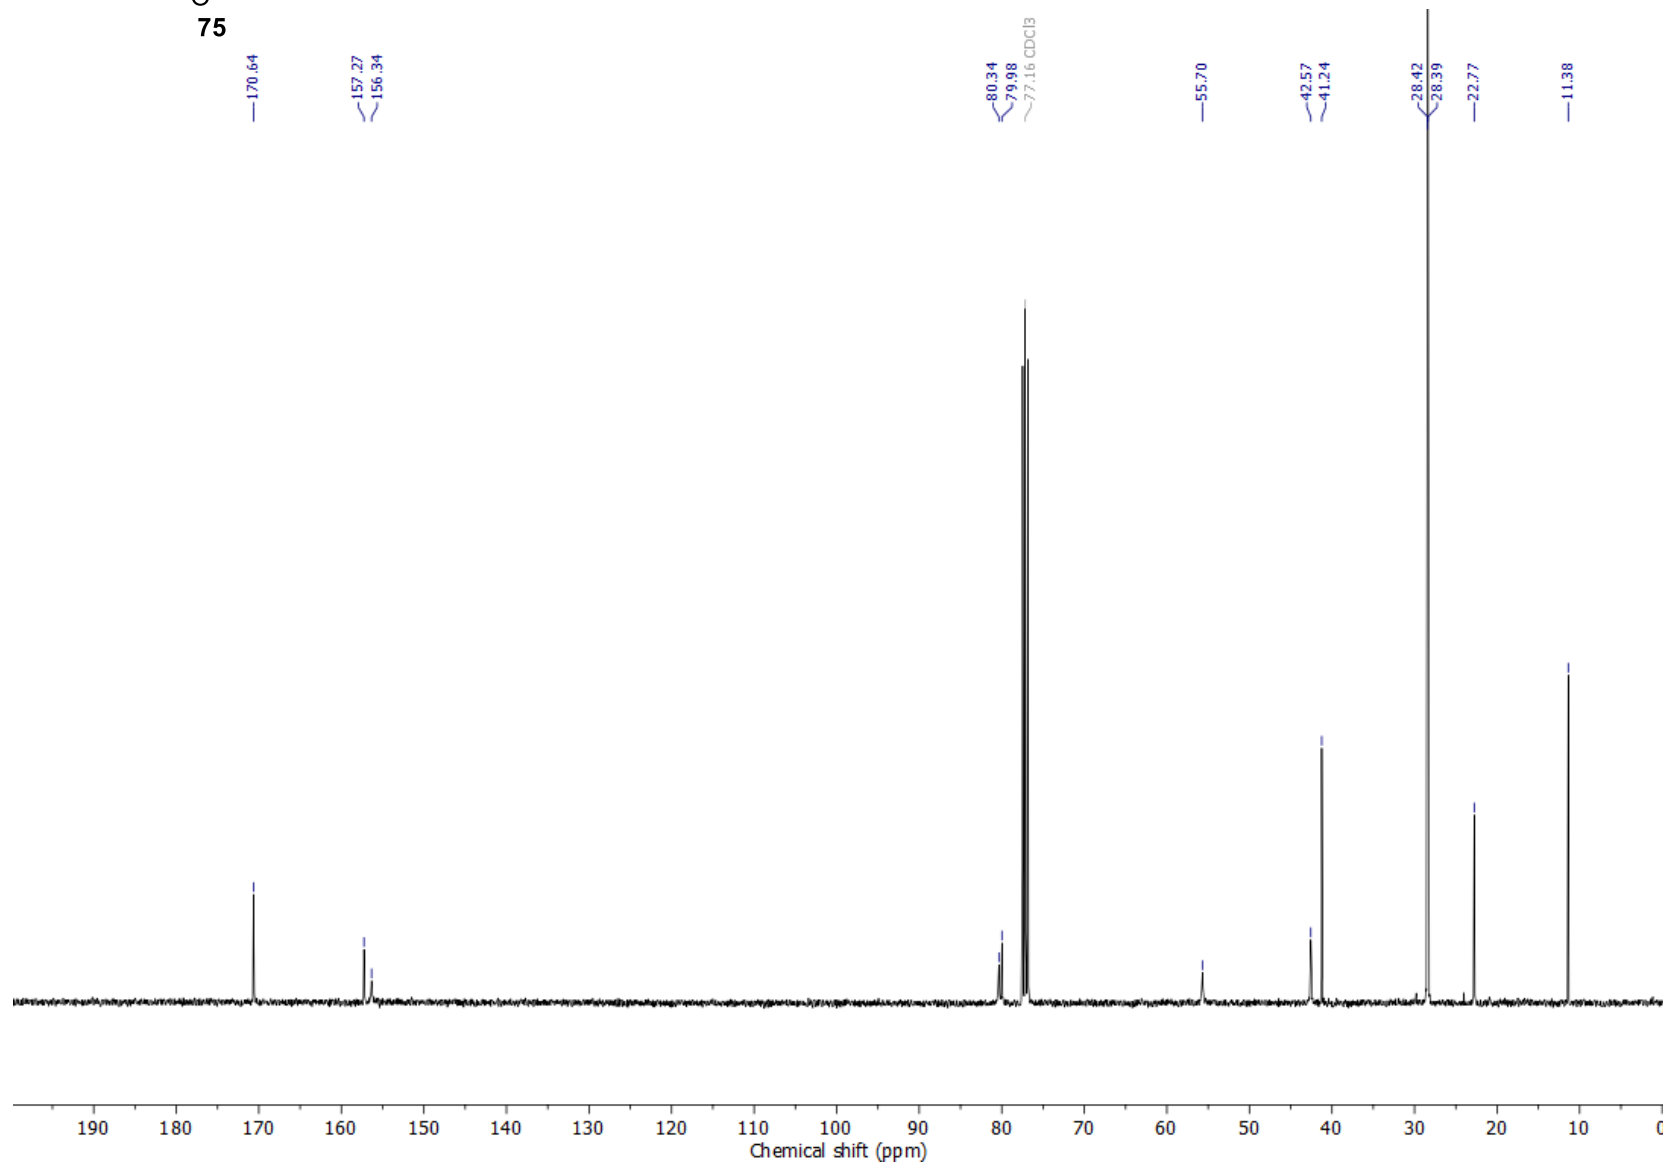

# $^1\text{H}$ NMR (400 MHz, $\text{CDCl}_3$ )

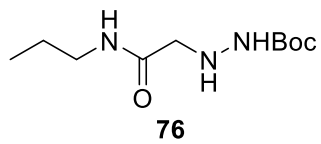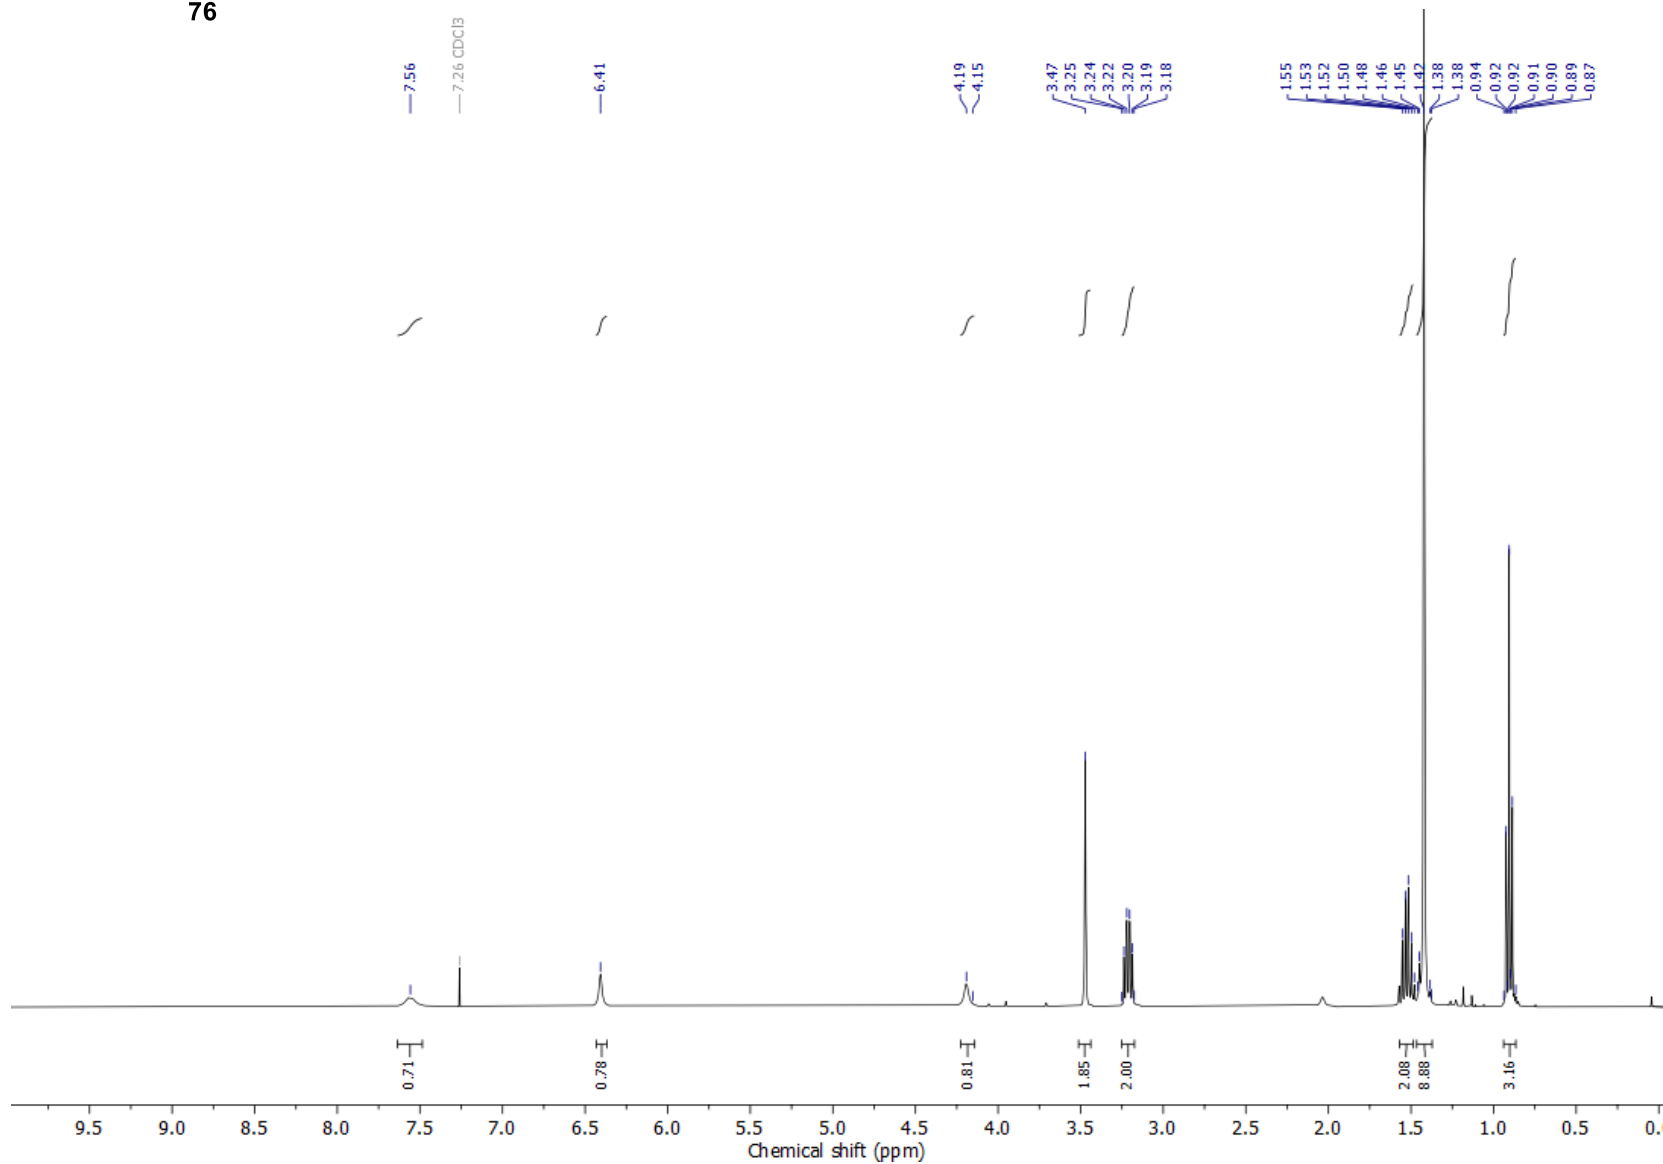

# $^{13}\text{C}$ NMR (100 MHz, $\text{CDCl}_3$ )

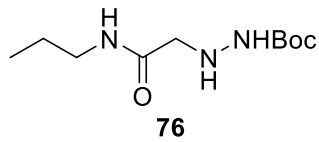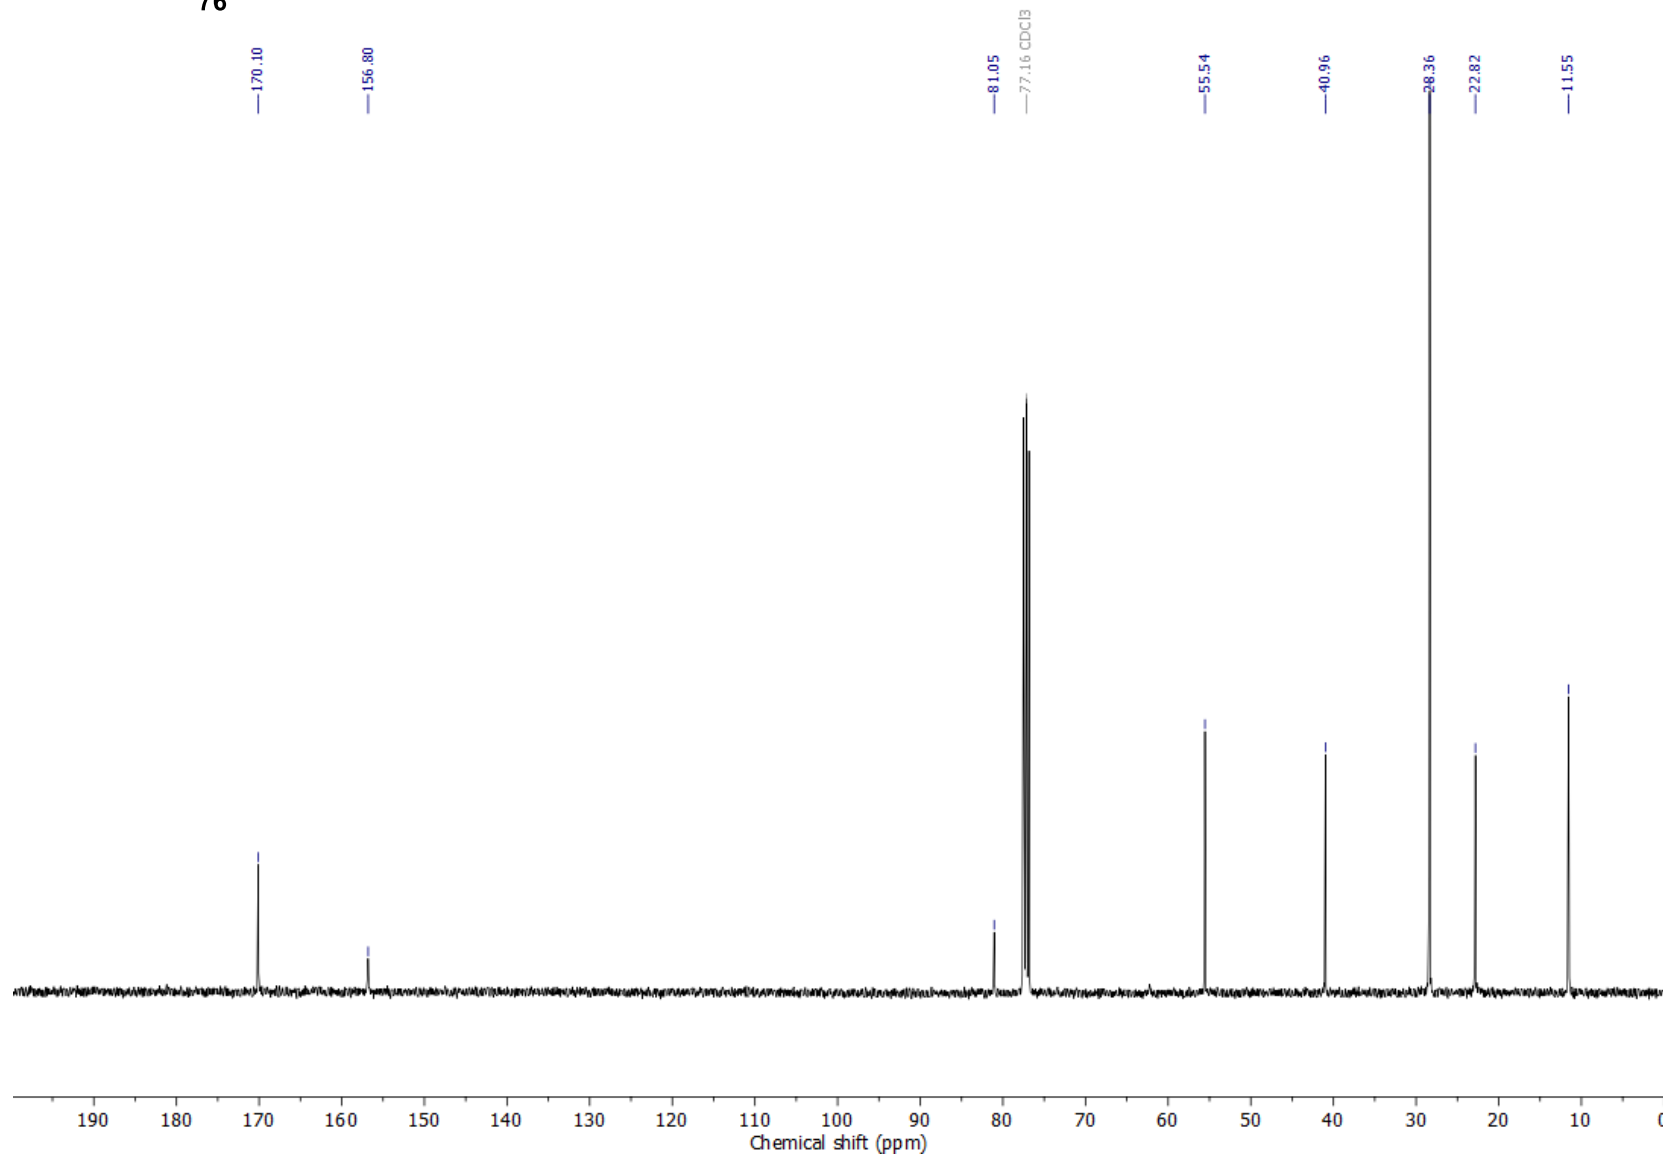

# $^1\text{H}$ NMR (400 MHz, MeOD)

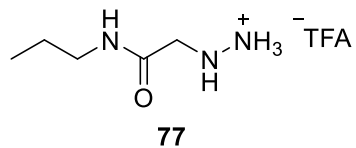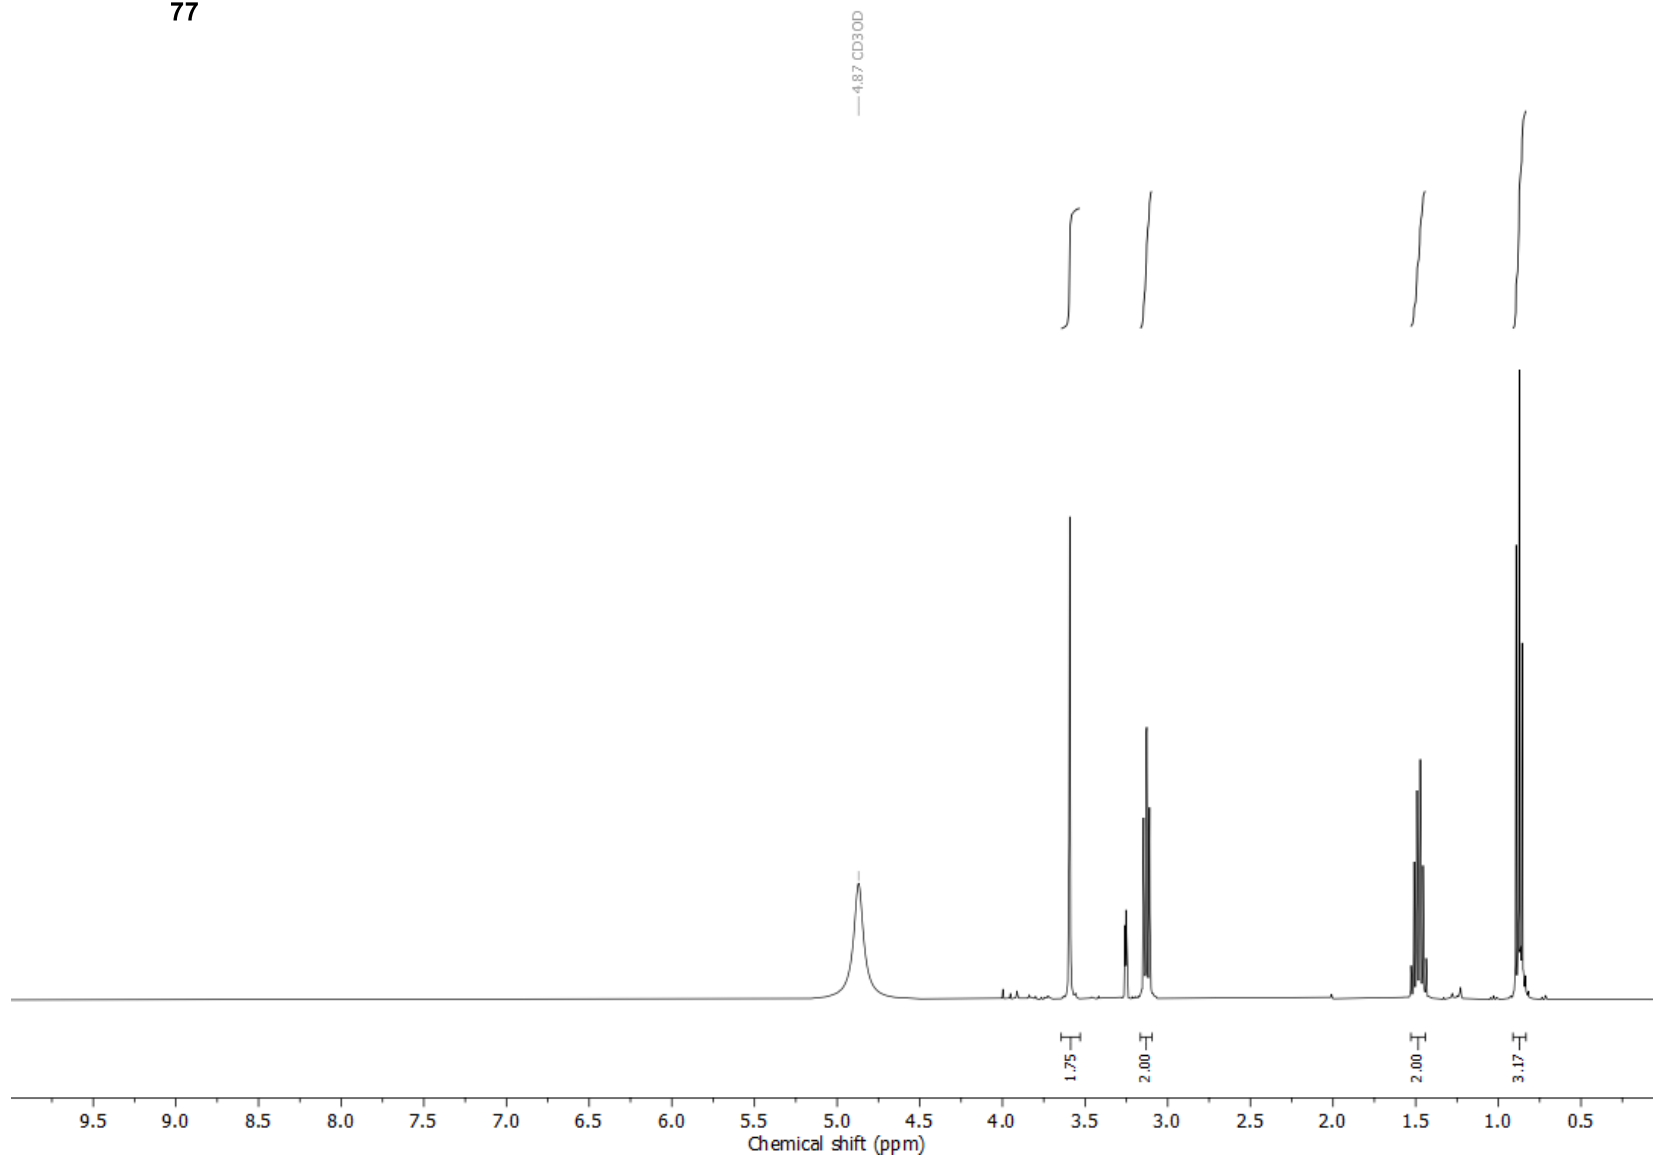

# $^{13}\text{C}$ NMR (100 MHz, MeOD)

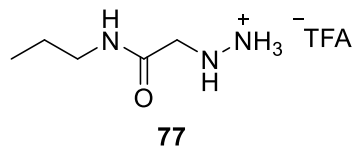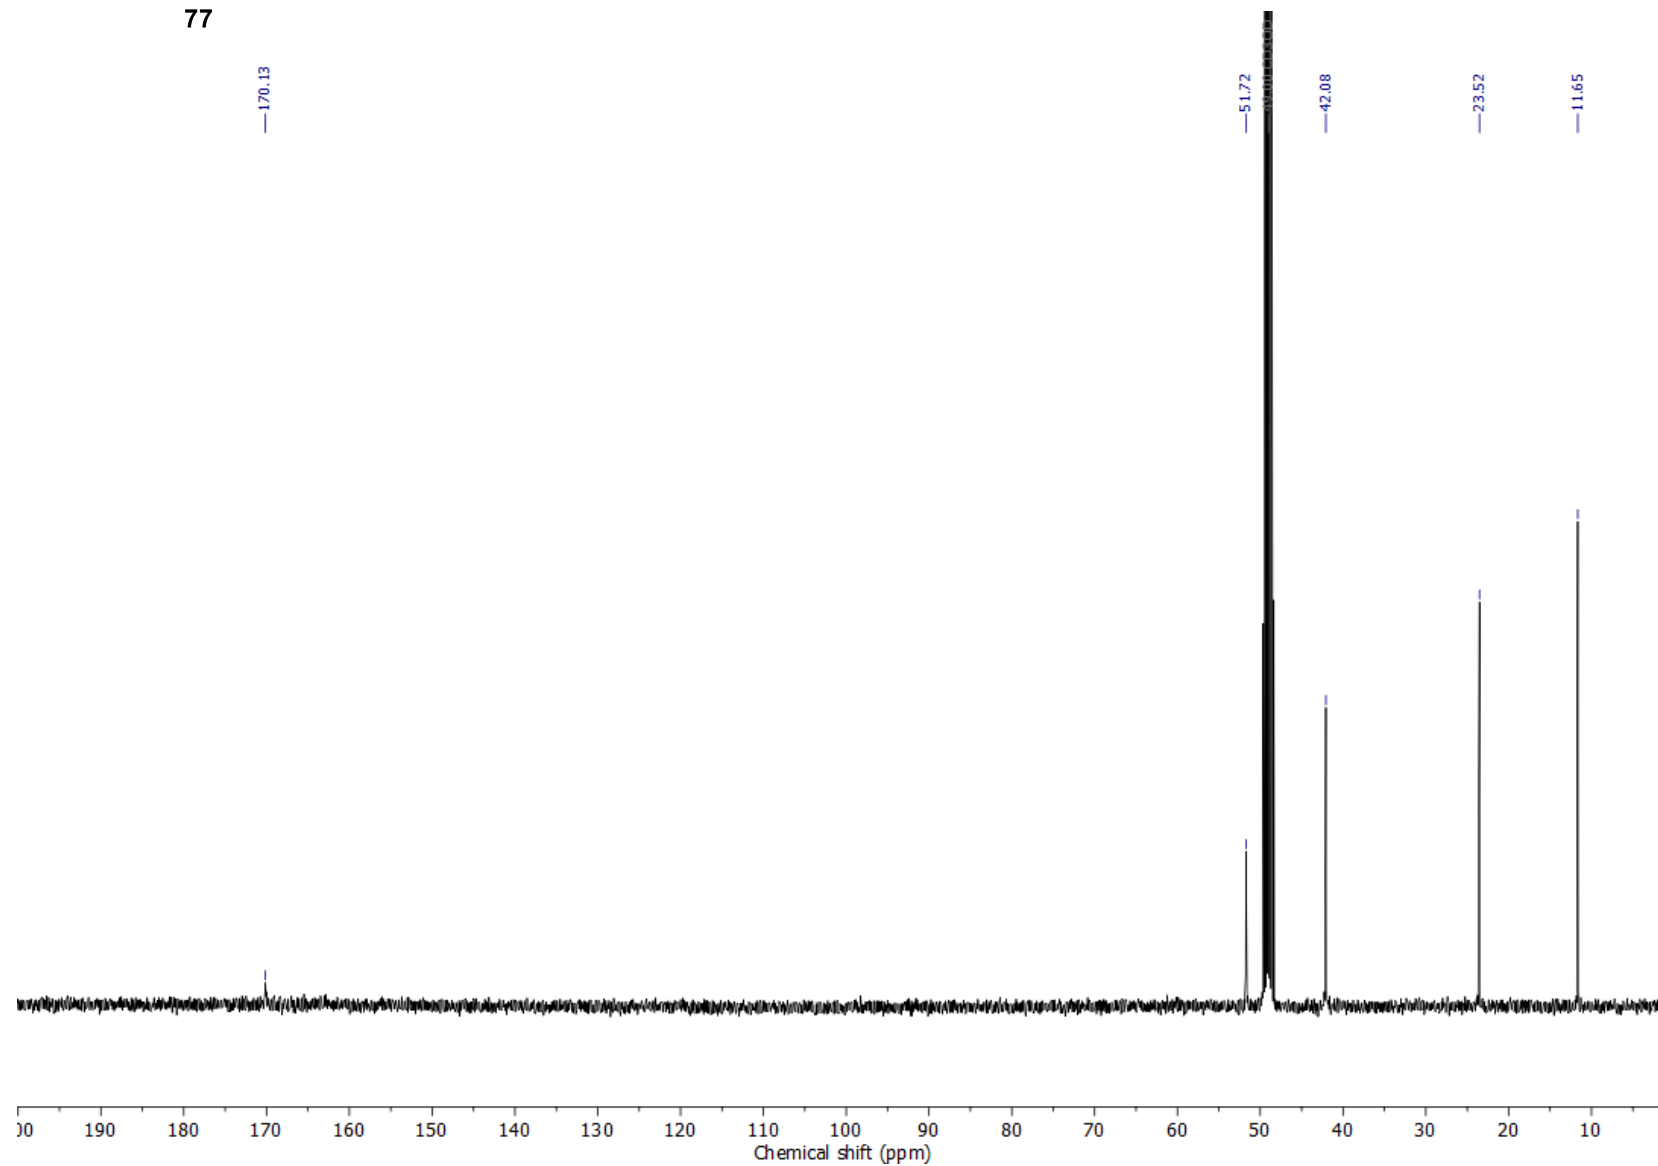

# $^1\text{H}$ NMR (400 MHz, $\text{CDCl}_3$ )

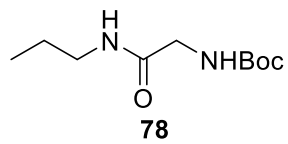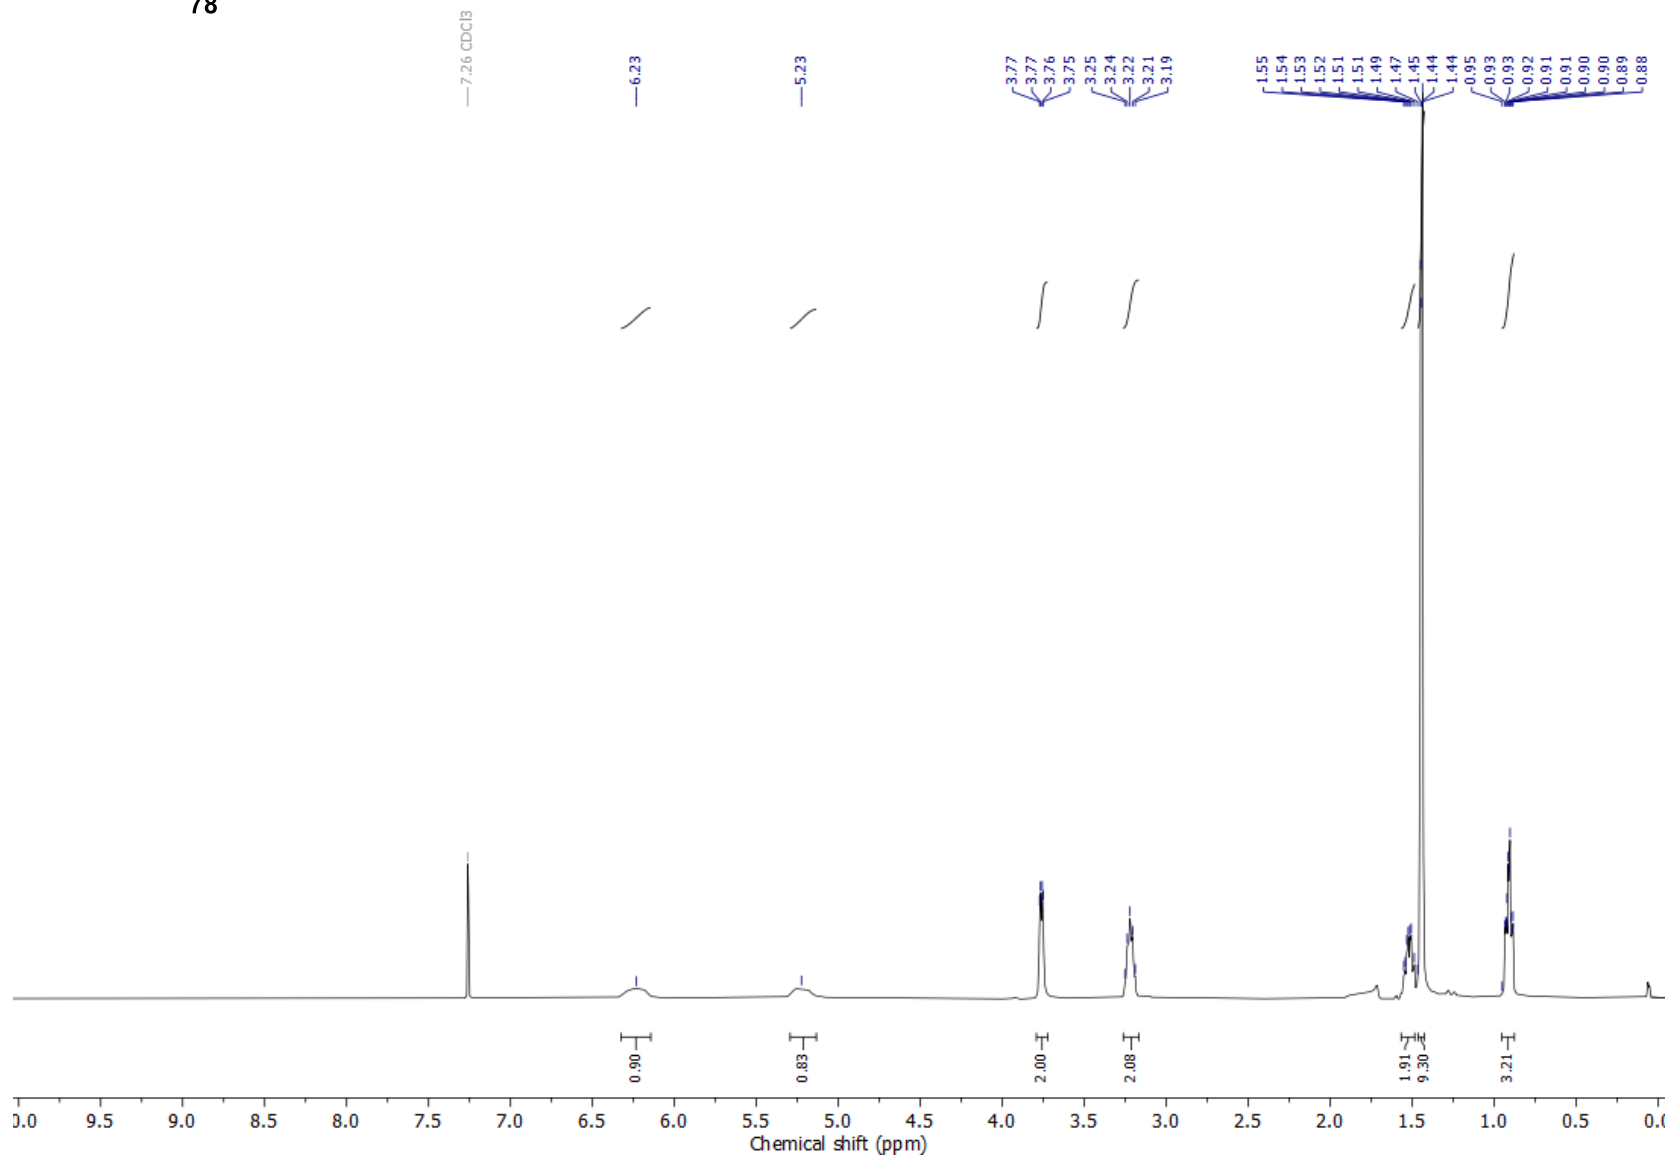

# $^{13}\text{C}$ NMR (100 MHz, $\text{CDCl}_3$ )

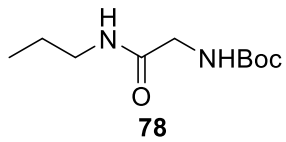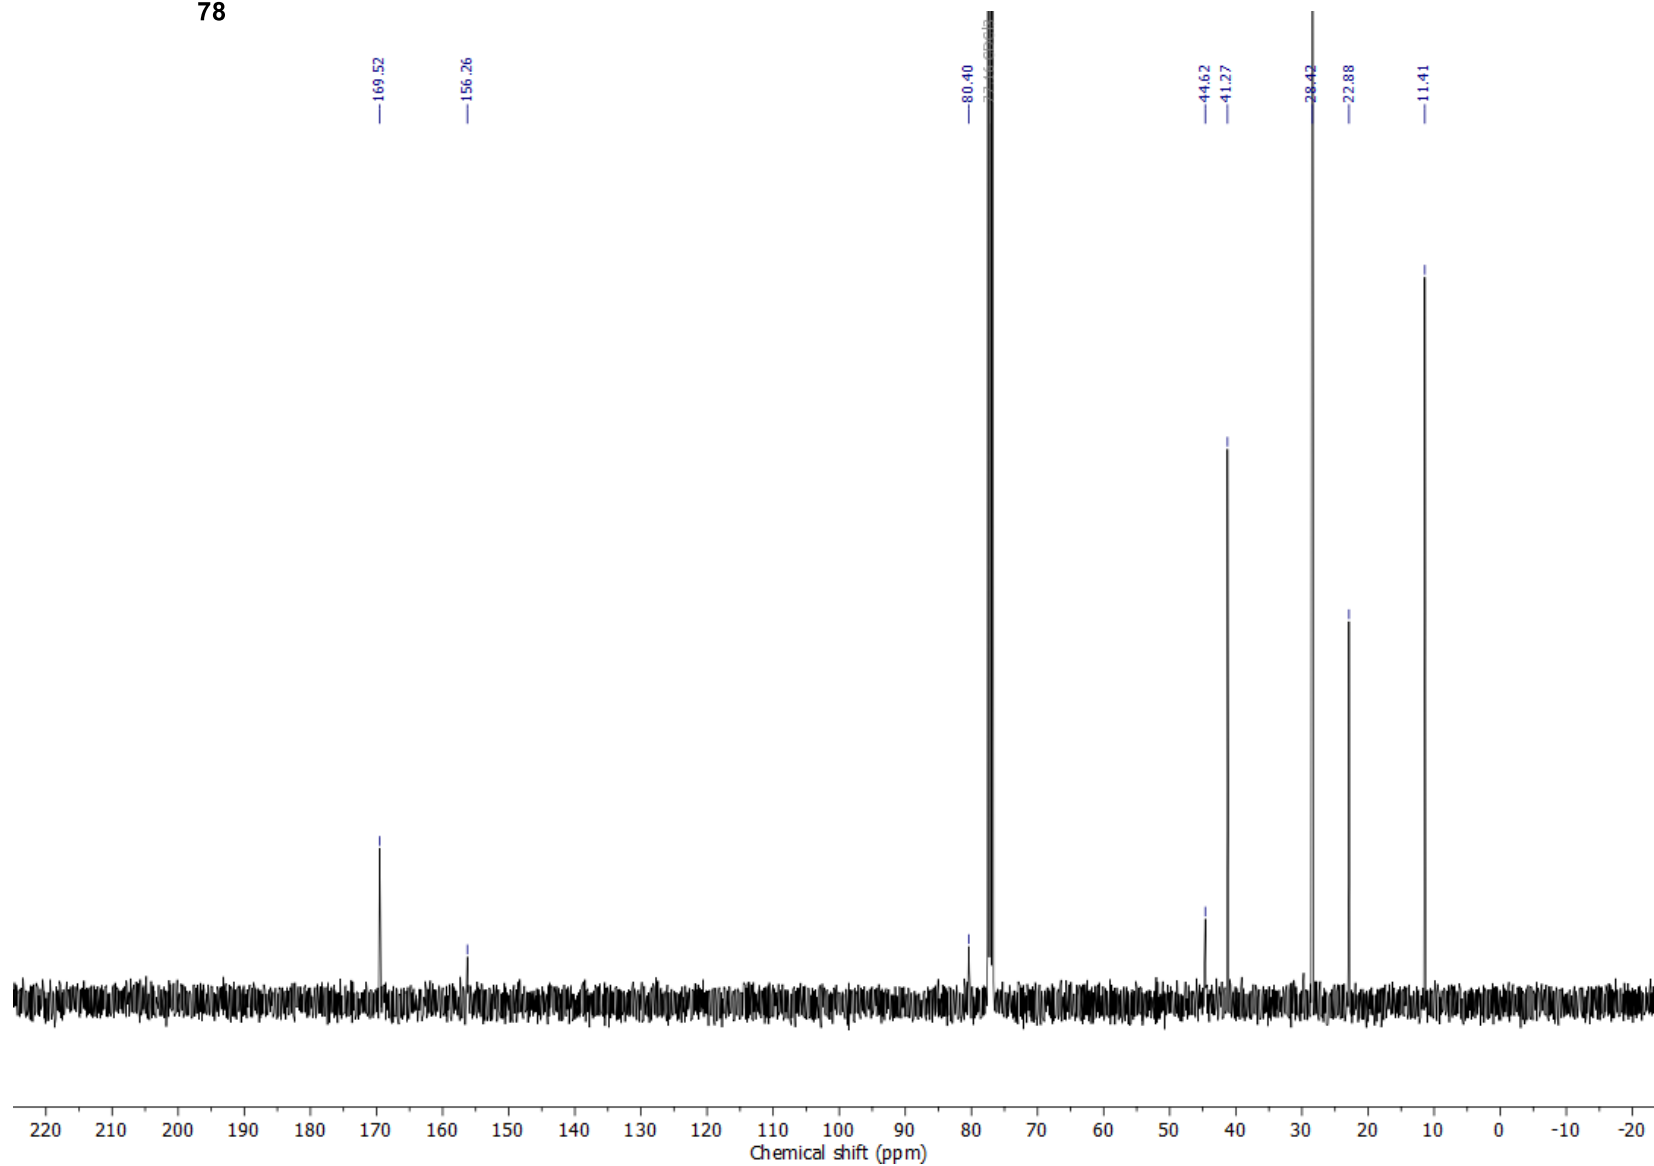

# $^1\text{H}$ NMR (400 MHz, MeOD)

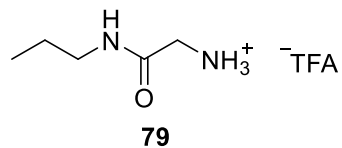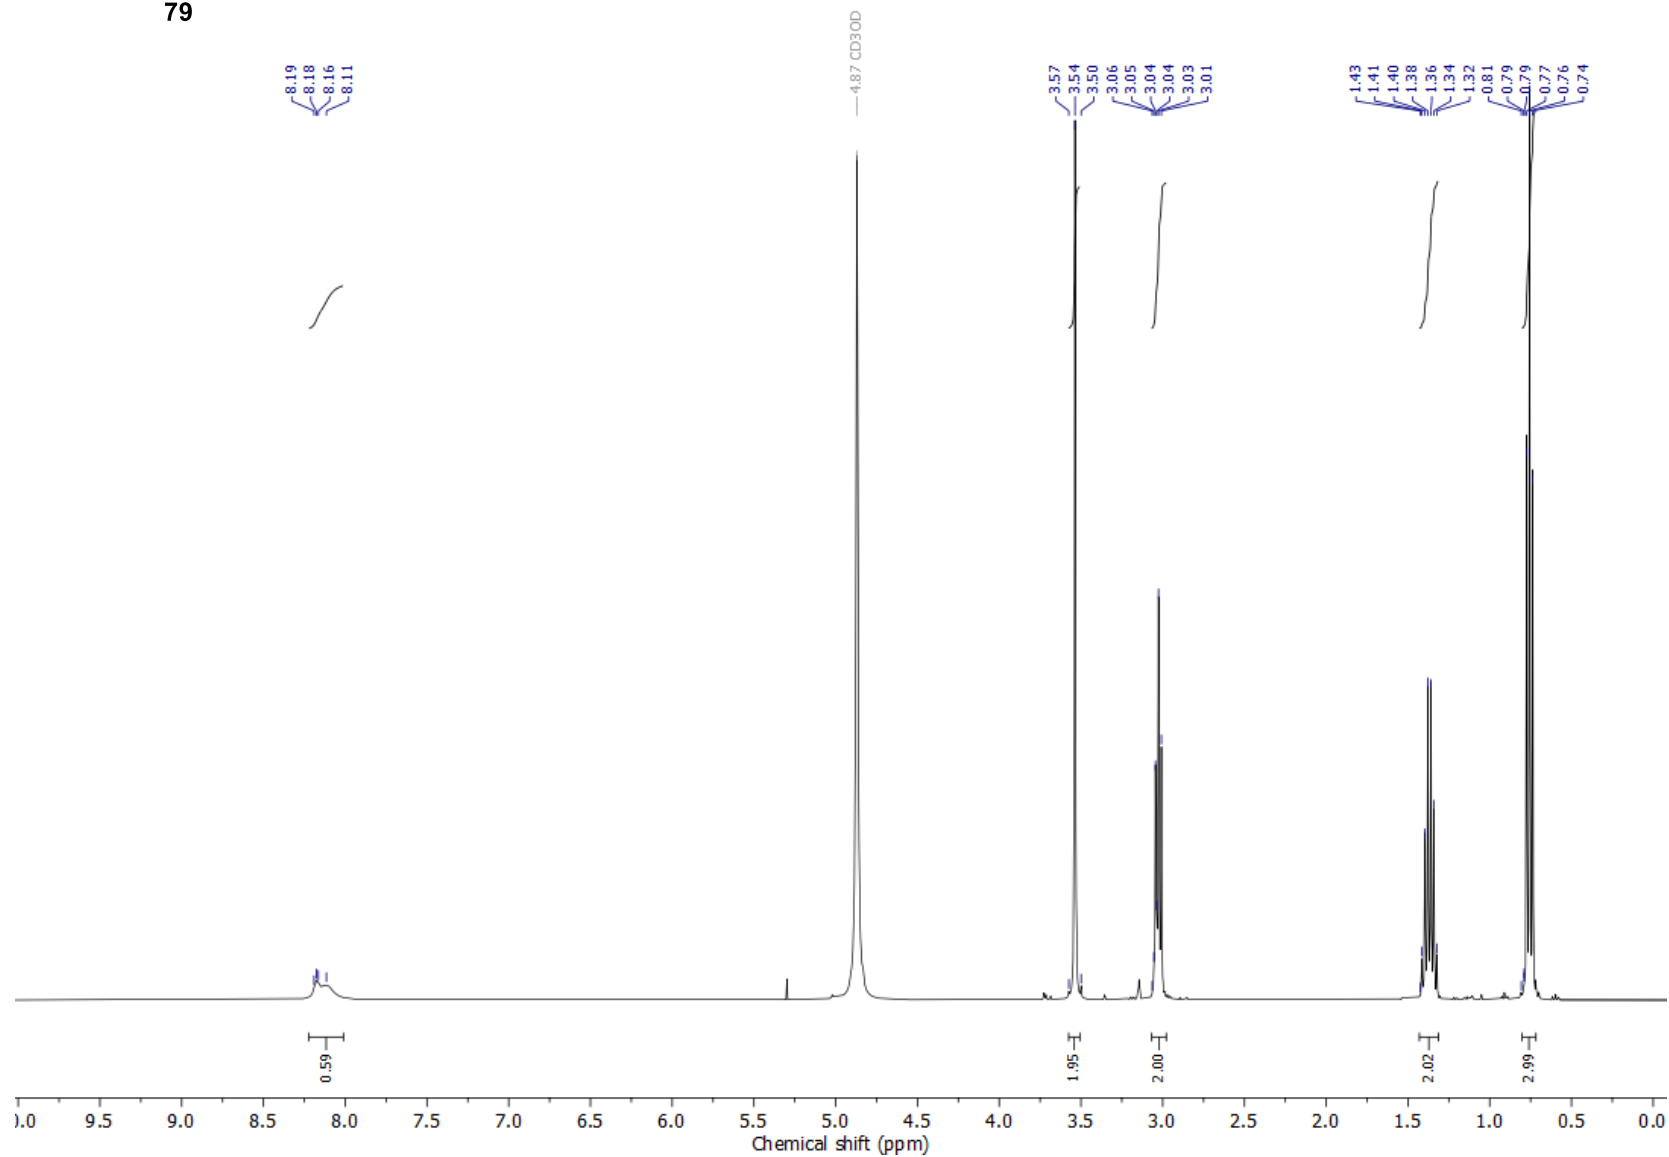

# $^{13}\text{C}$ NMR (100 MHz, MeOD)

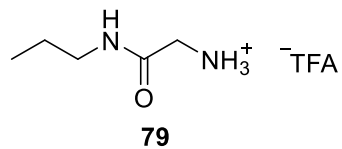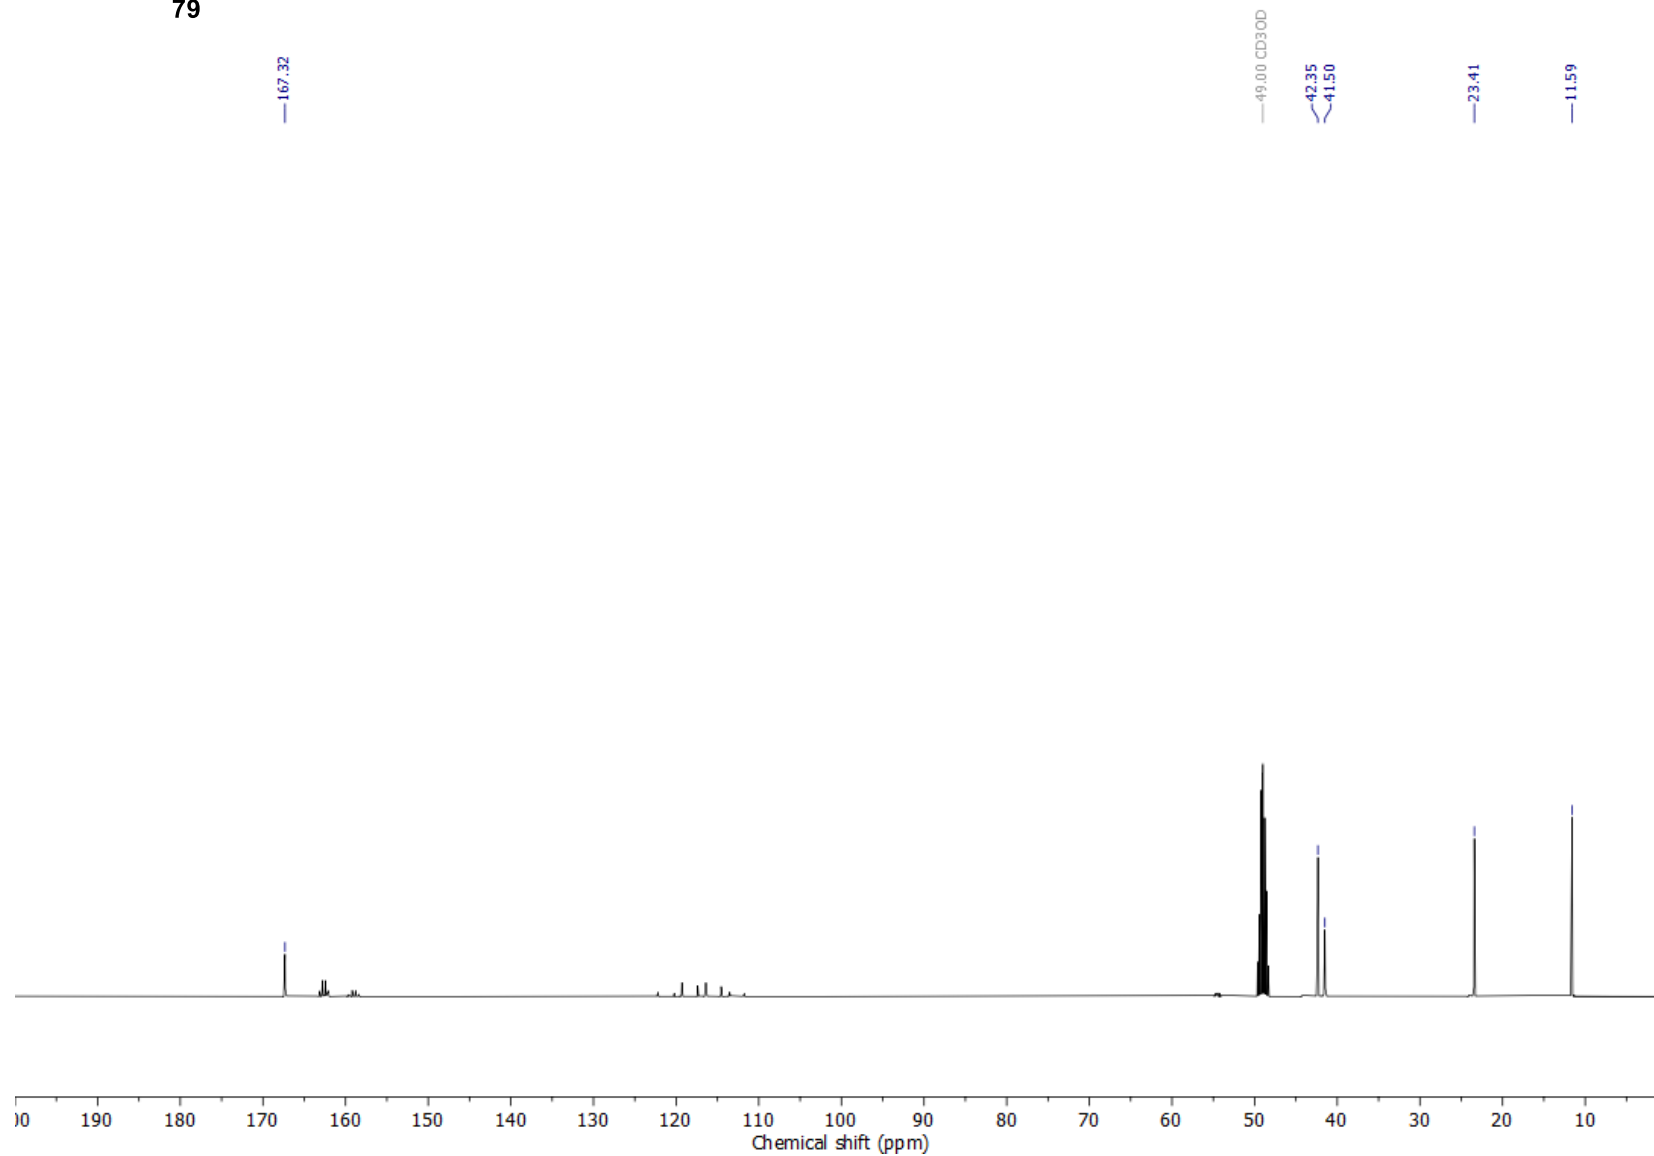

# $^1\text{H}$ NMR (400 MHz, $\text{CDCl}_3$ )

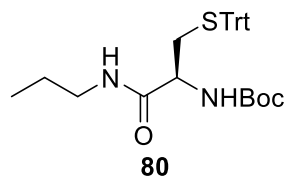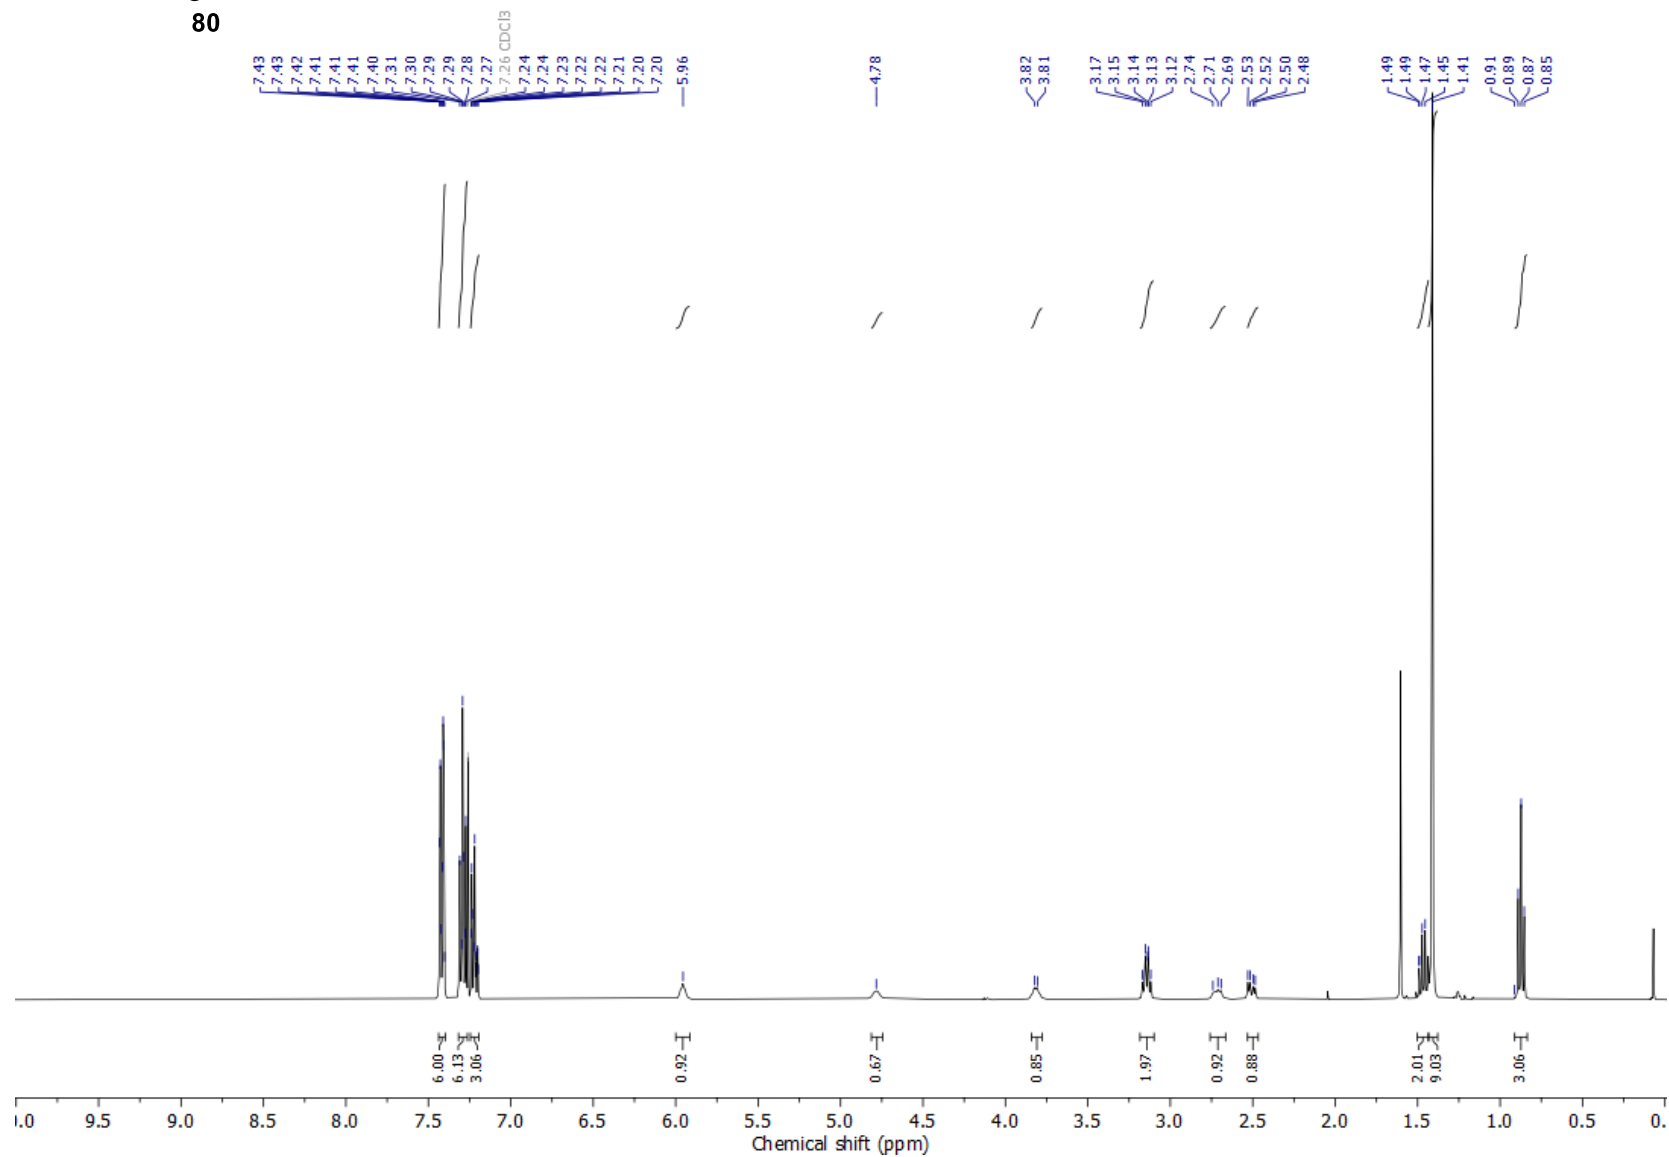

# $^{13}\text{C}$ NMR (100 MHz, $\text{CDCl}_3$ )

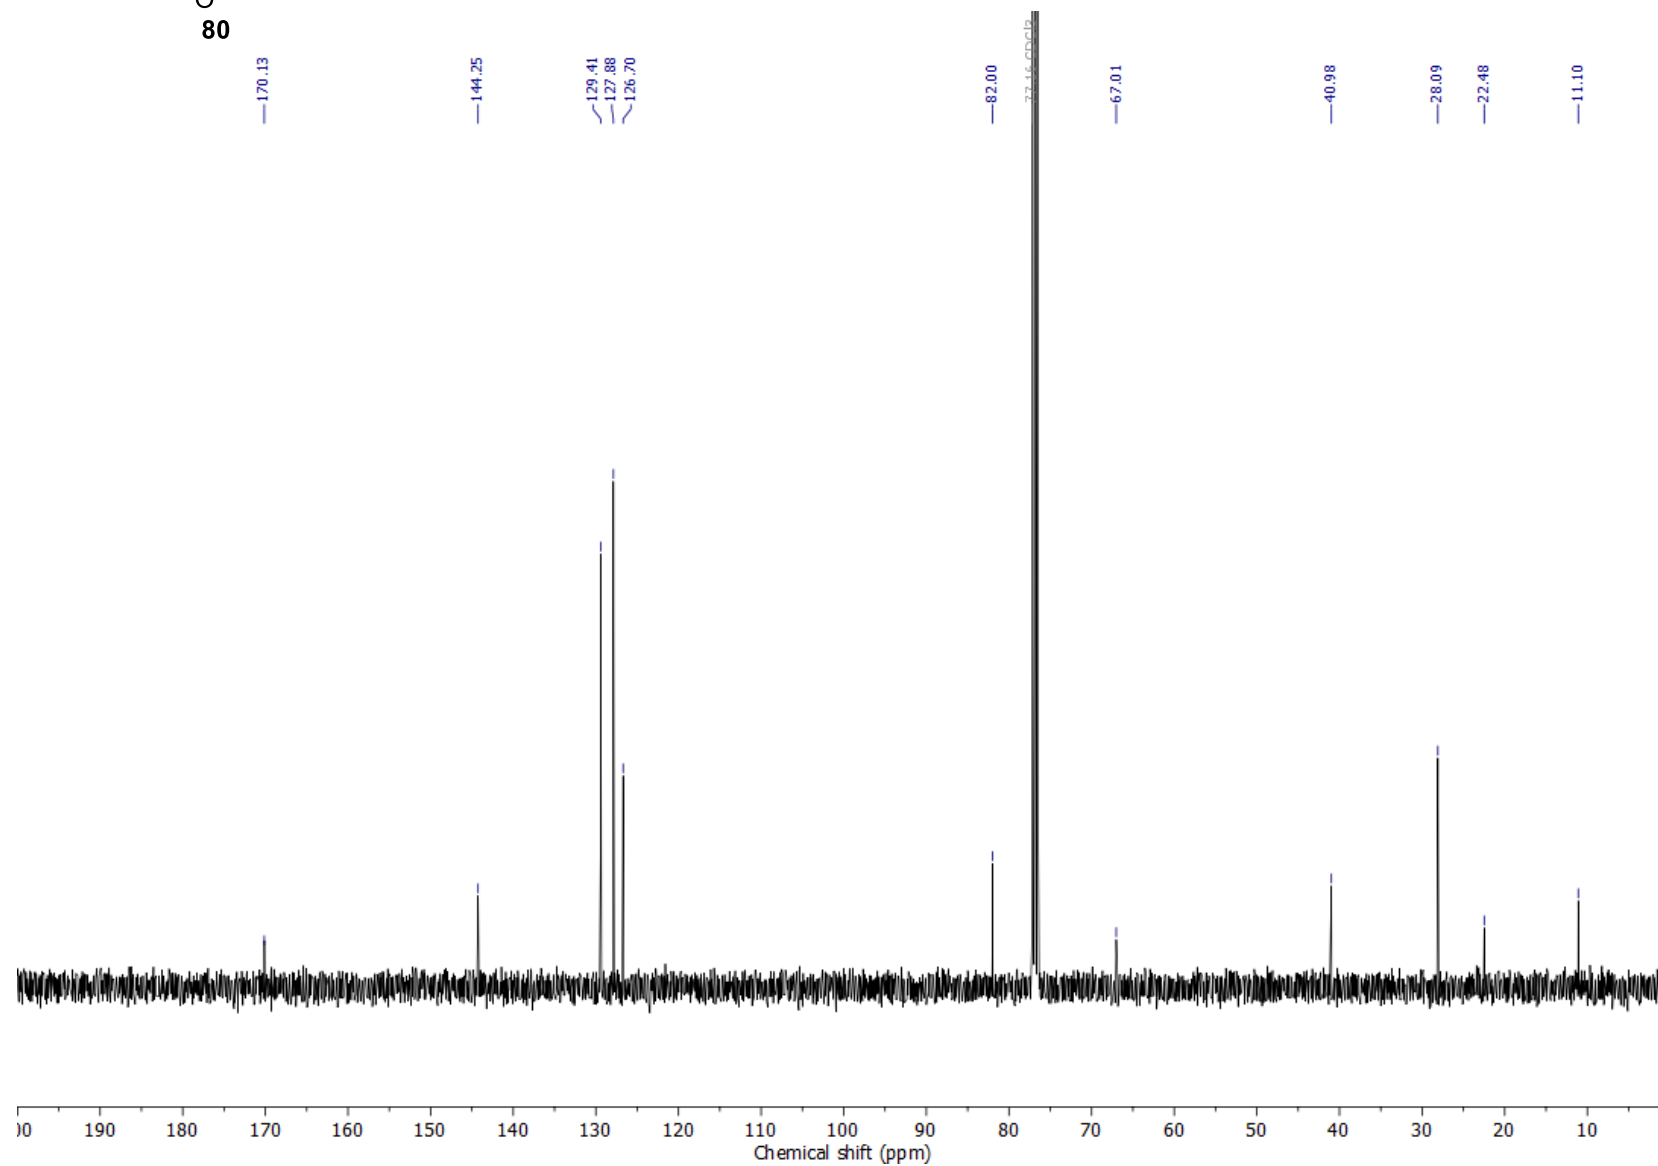

# $^1\text{H}$ NMR (400 MHz, MeOD)

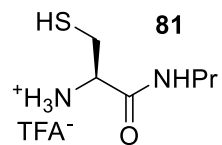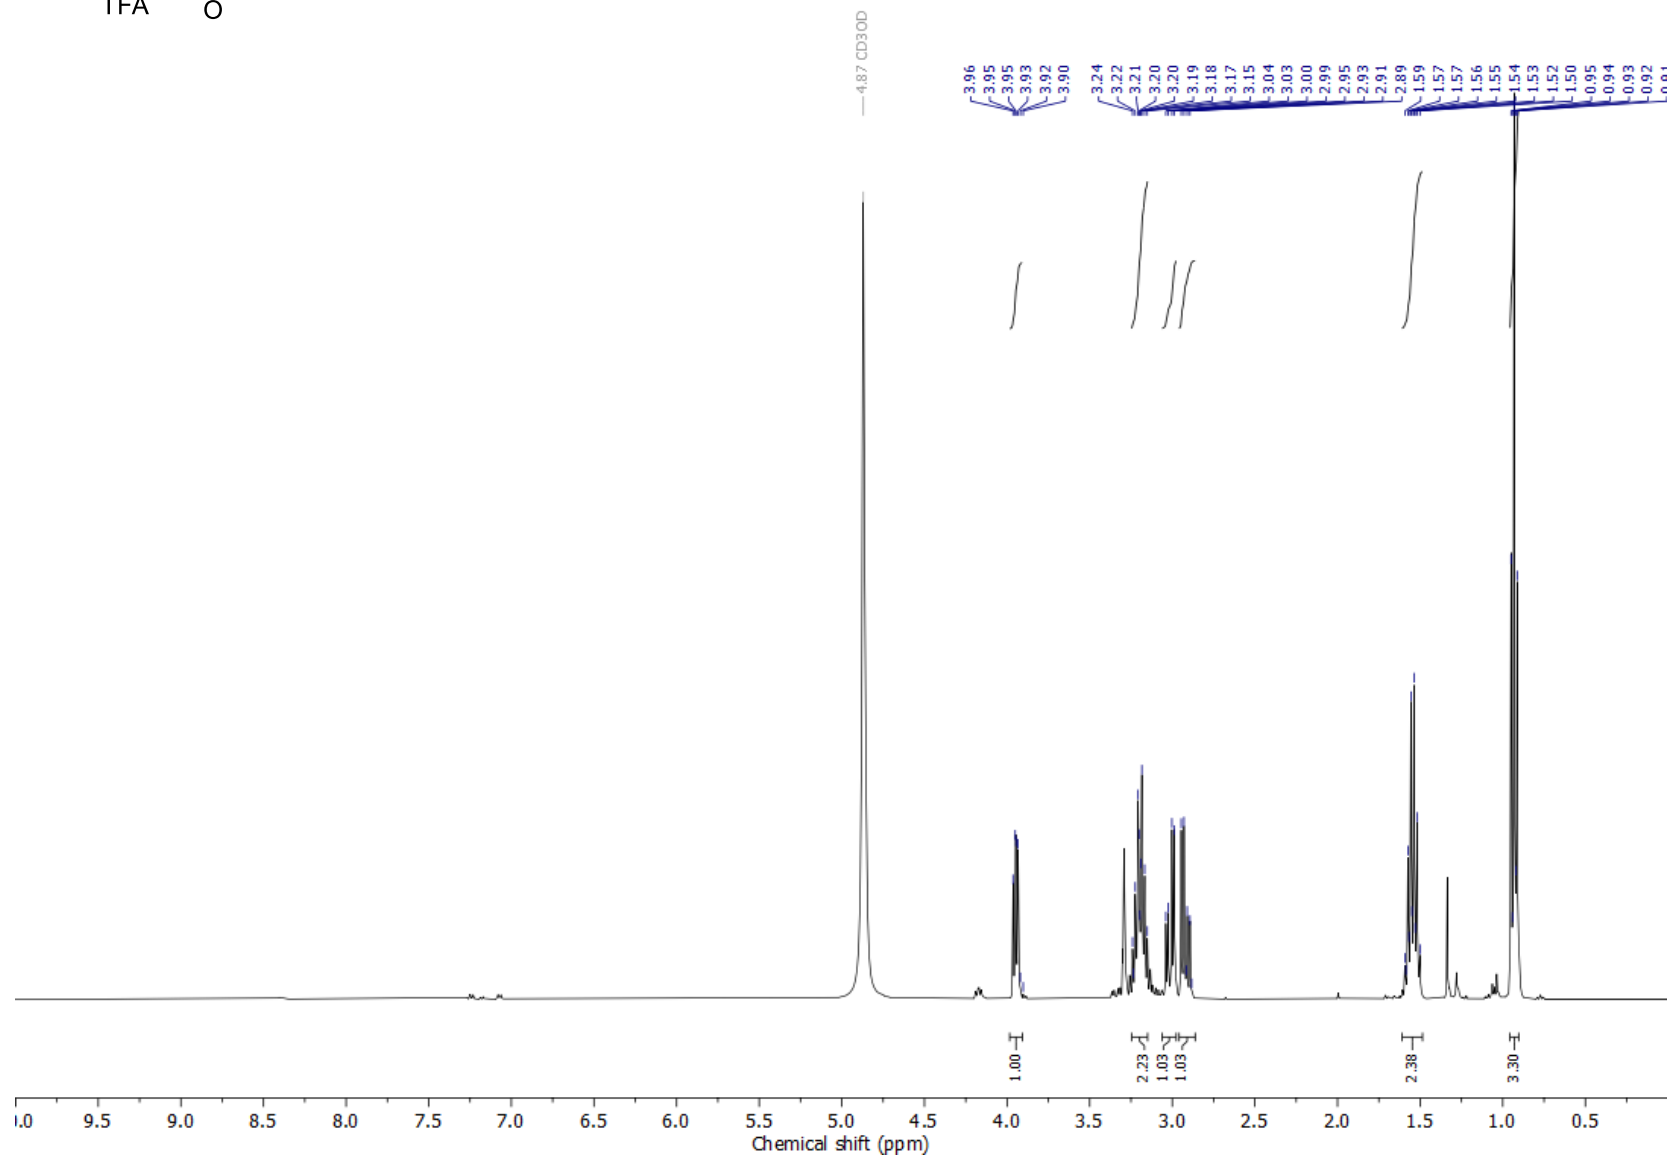

# $^{13}\text{C}$ NMR (100 MHz, MeOD)

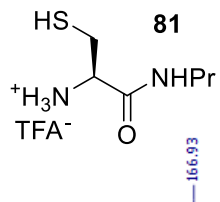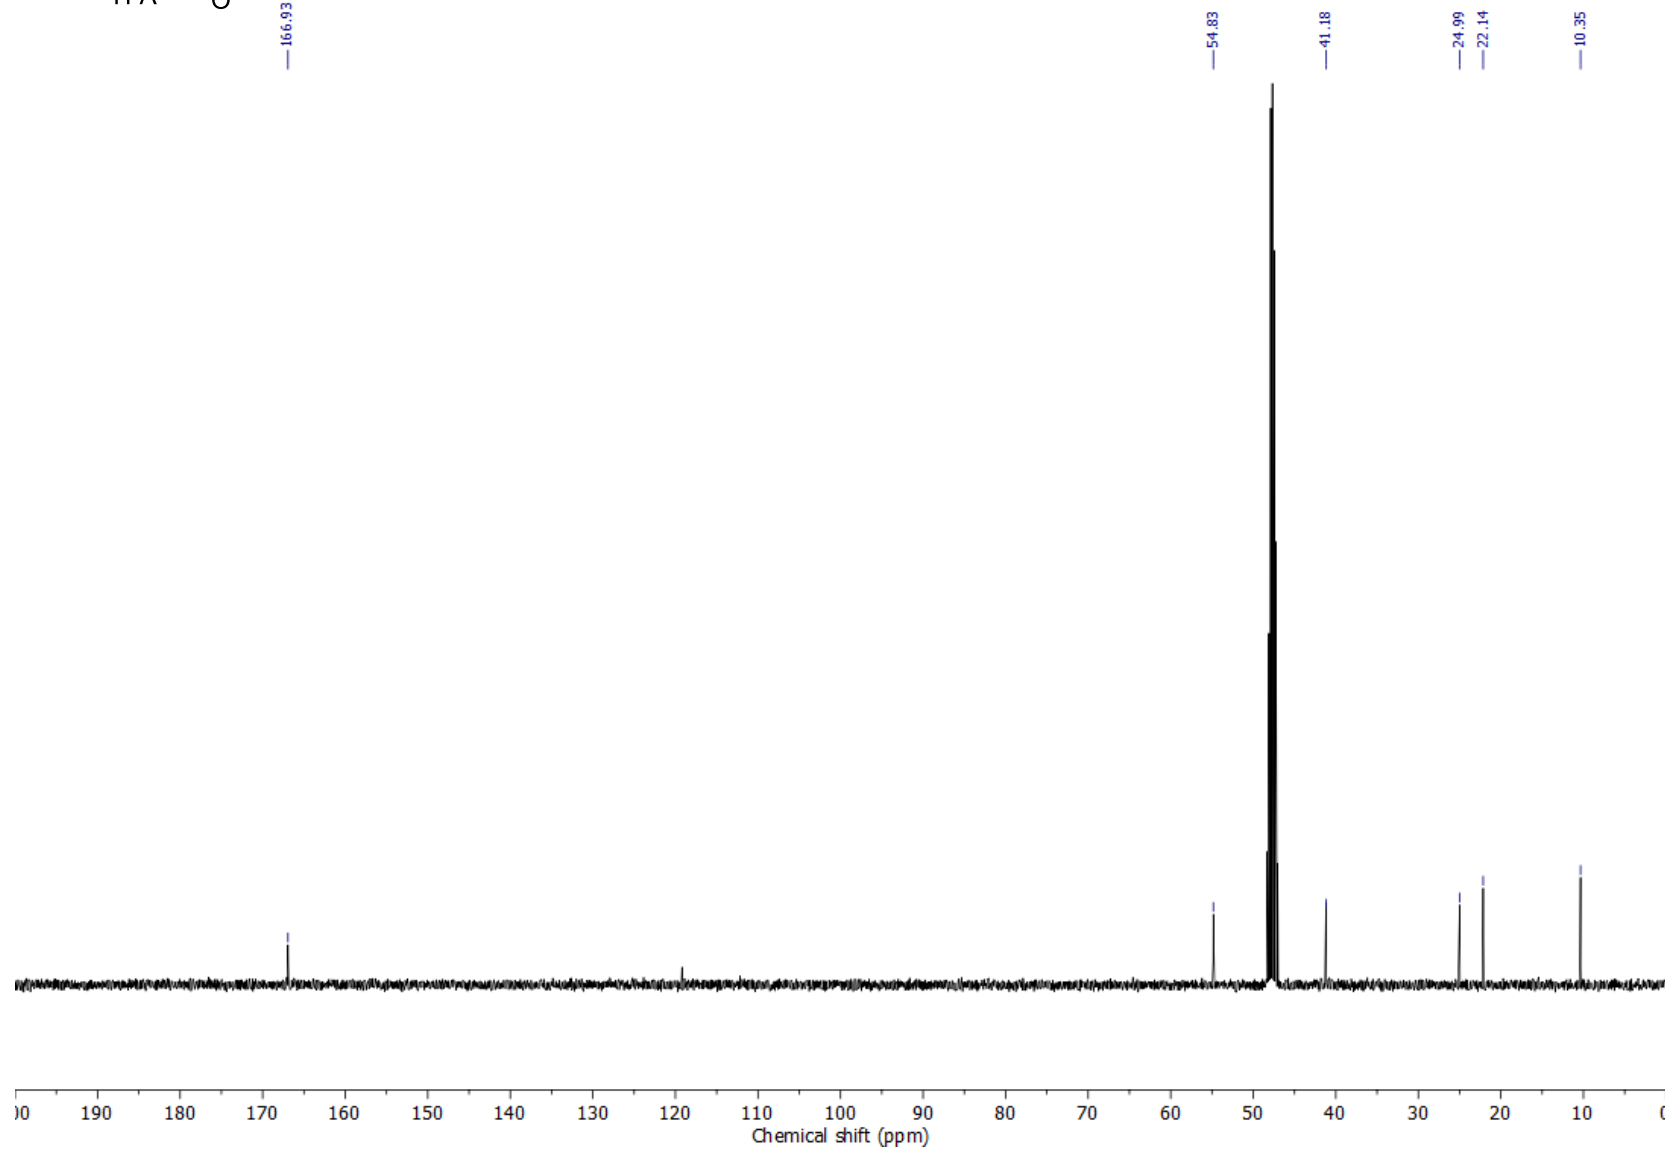

$^1\text{H}$  NMR (400 MHz,  $\text{CDCl}_3$ )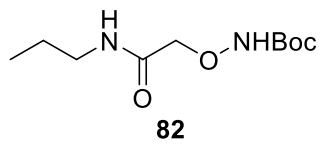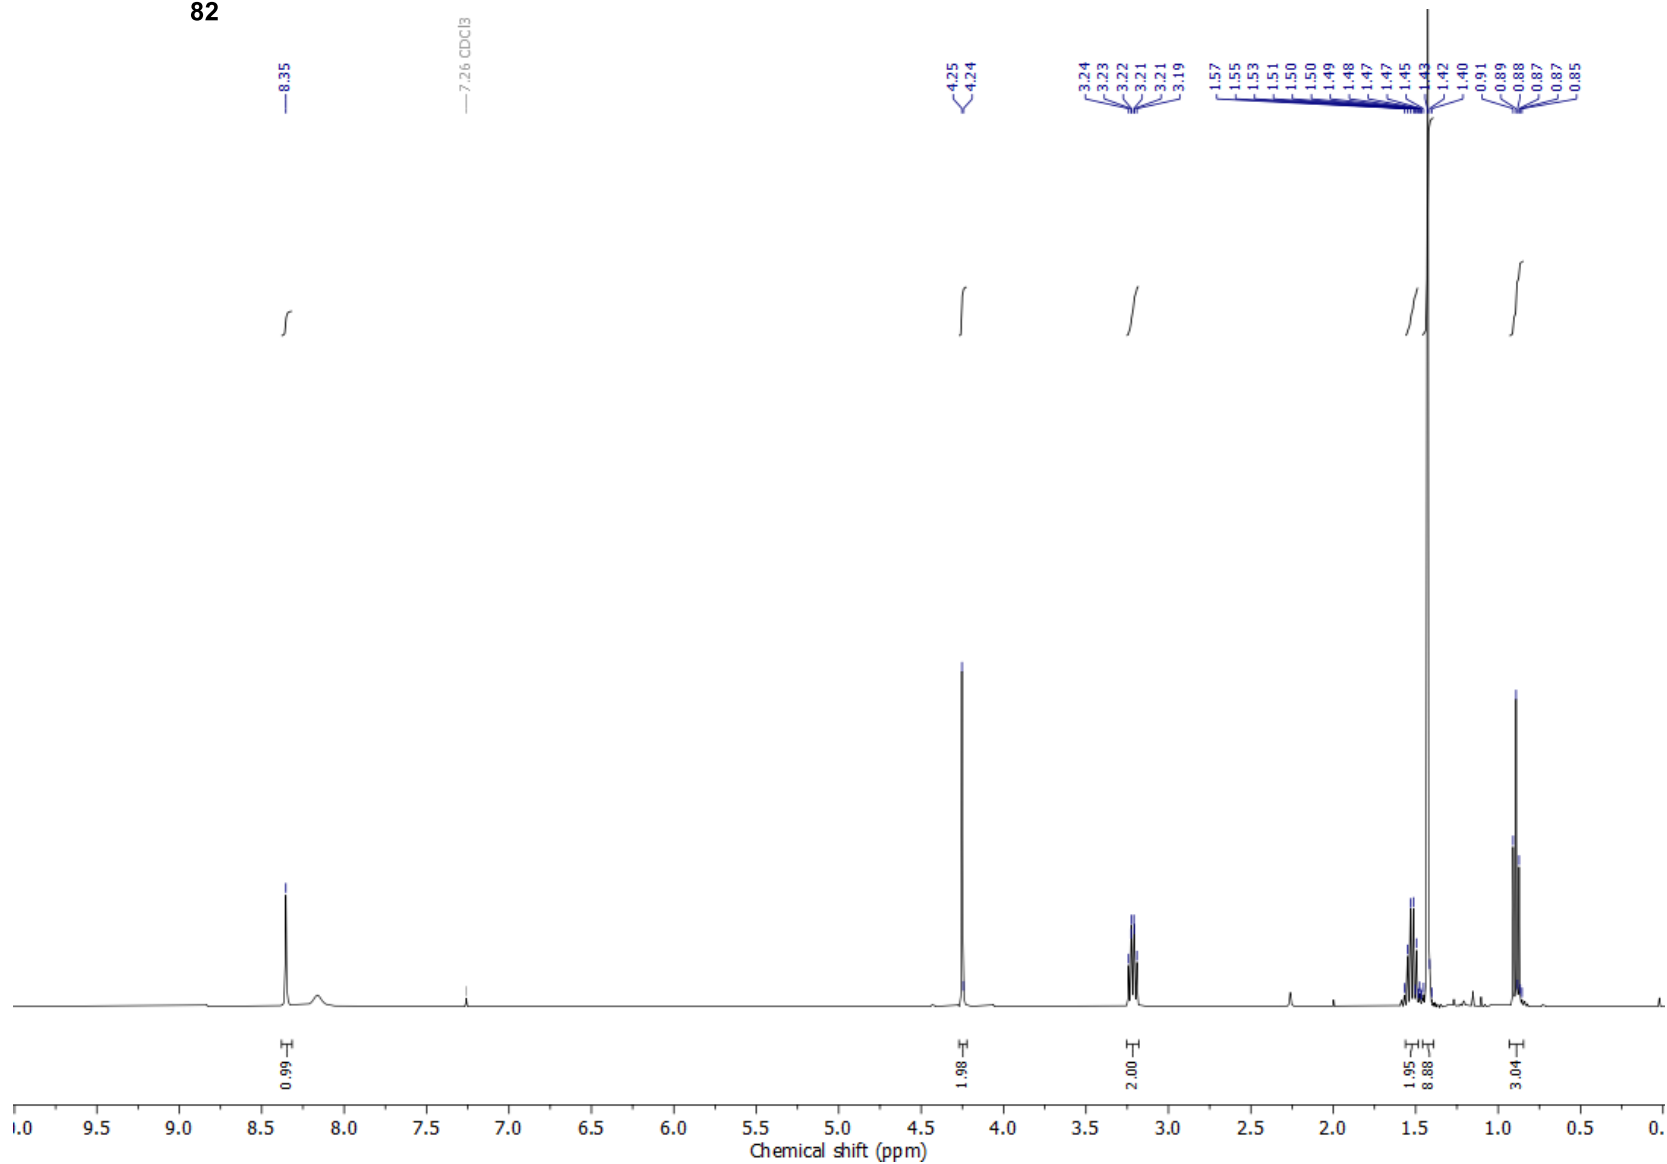

# $^{13}\text{C}$ NMR (100 MHz, $\text{CDCl}_3$ )

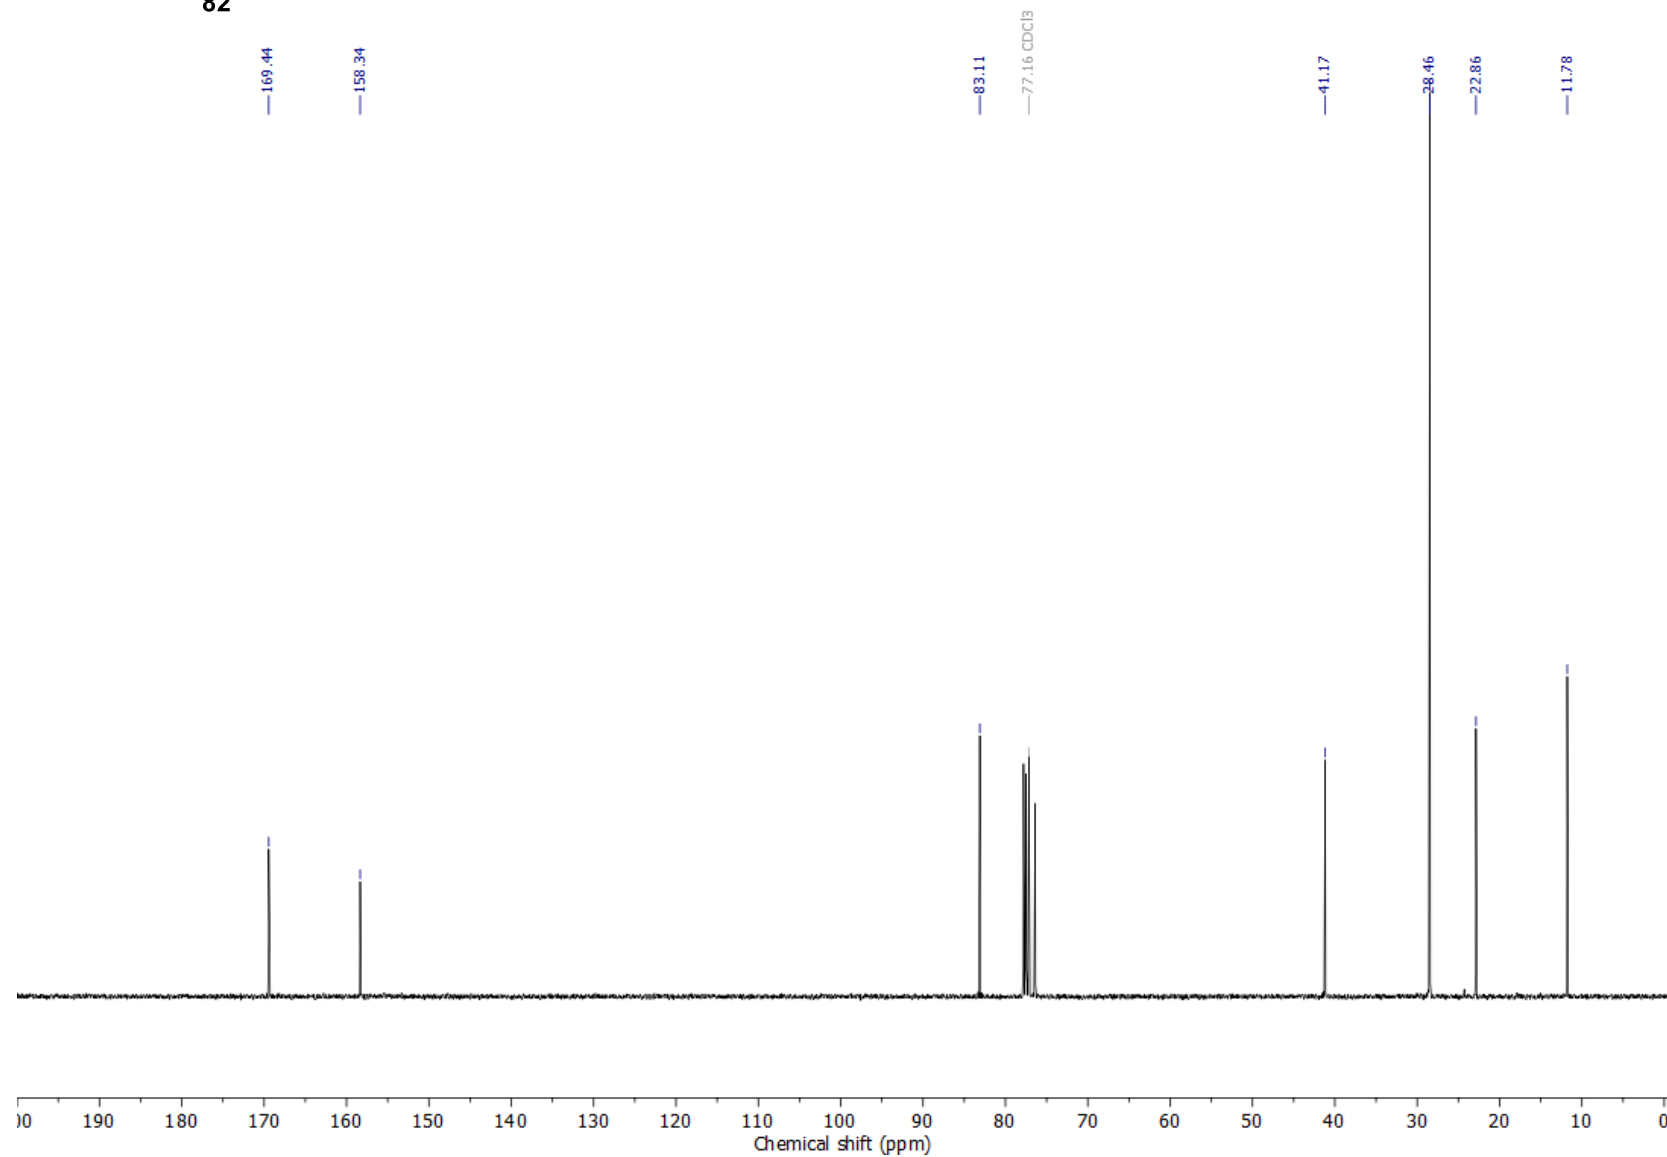

# $^1\text{H}$ NMR (400 MHz, MeOD)

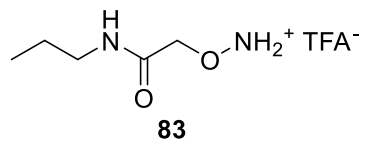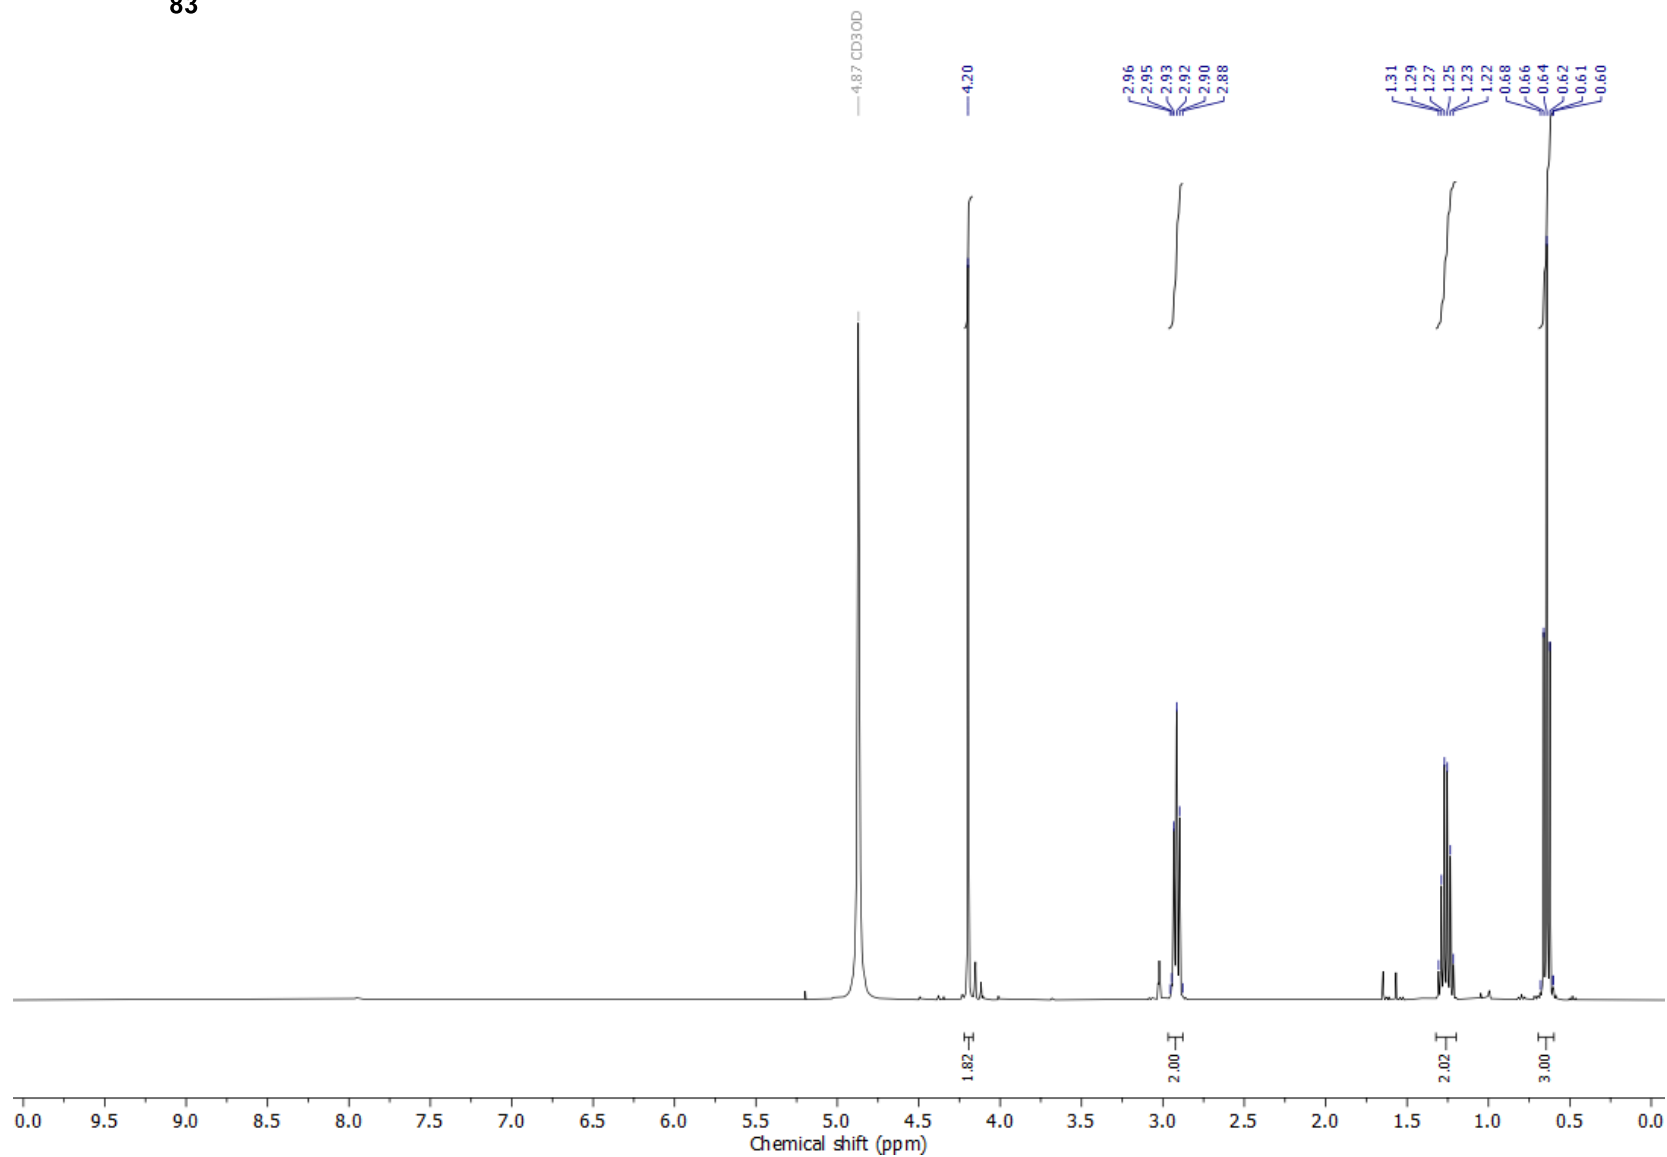

# $^{13}\text{C}$ NMR (100 MHz, MeOD)

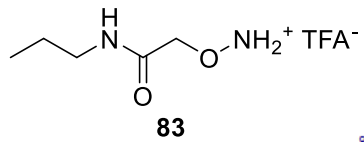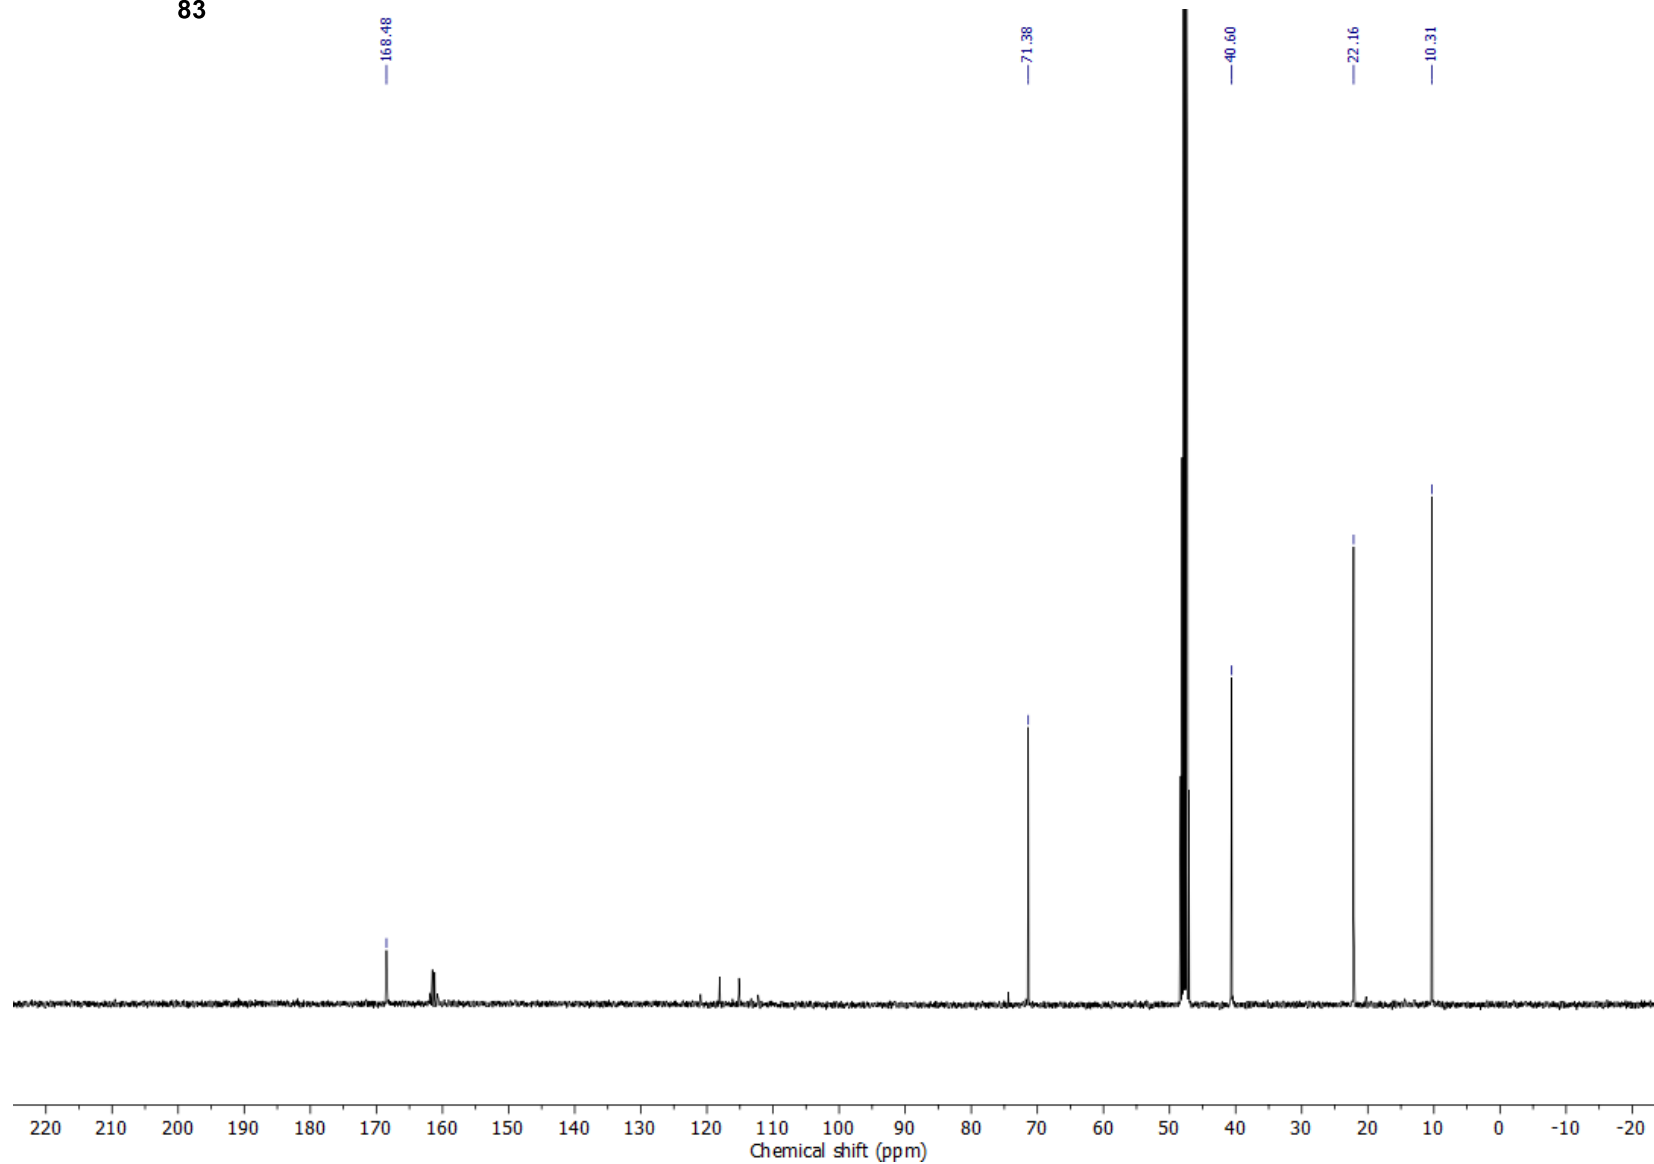

# $^1\text{H}$ NMR (400 MHz, $\text{CDCl}_3$ )

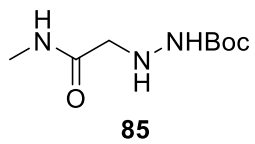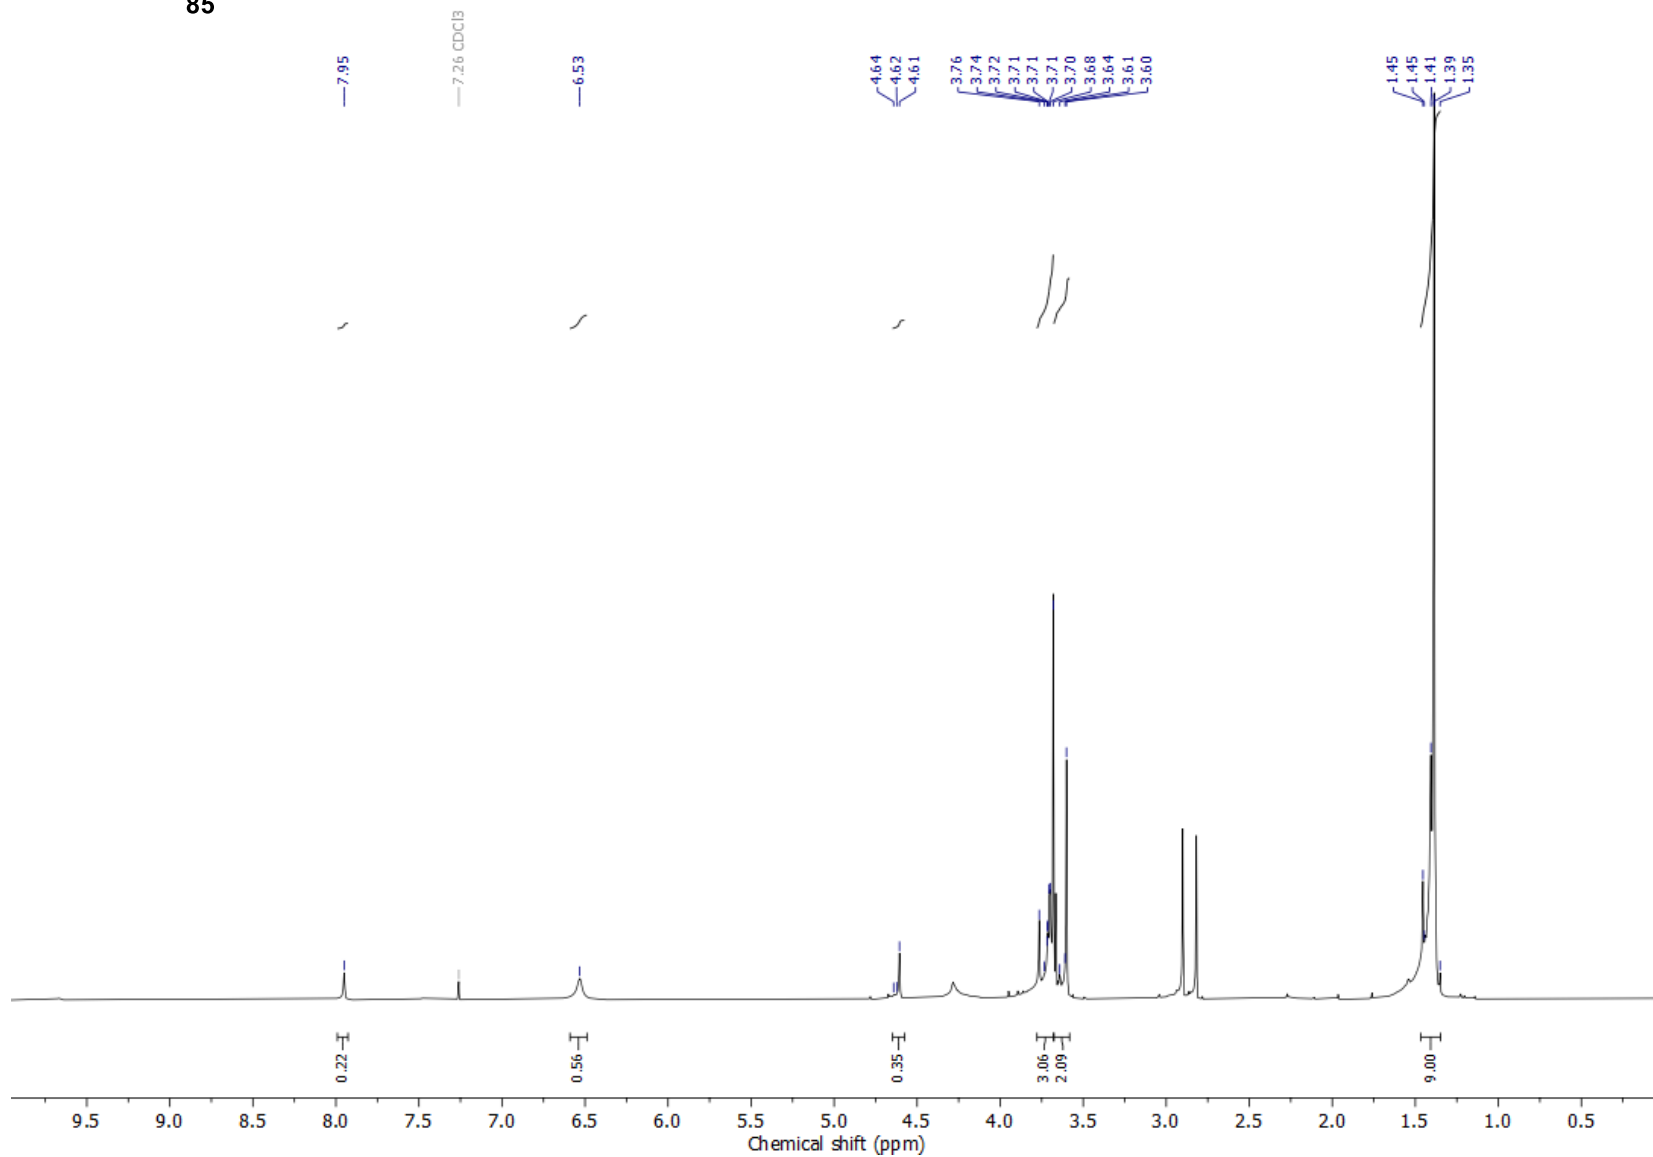

# $^{13}\text{C}$ NMR (100 MHz, $\text{CDCl}_3$ )

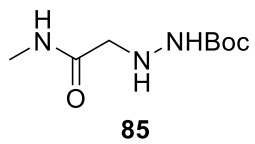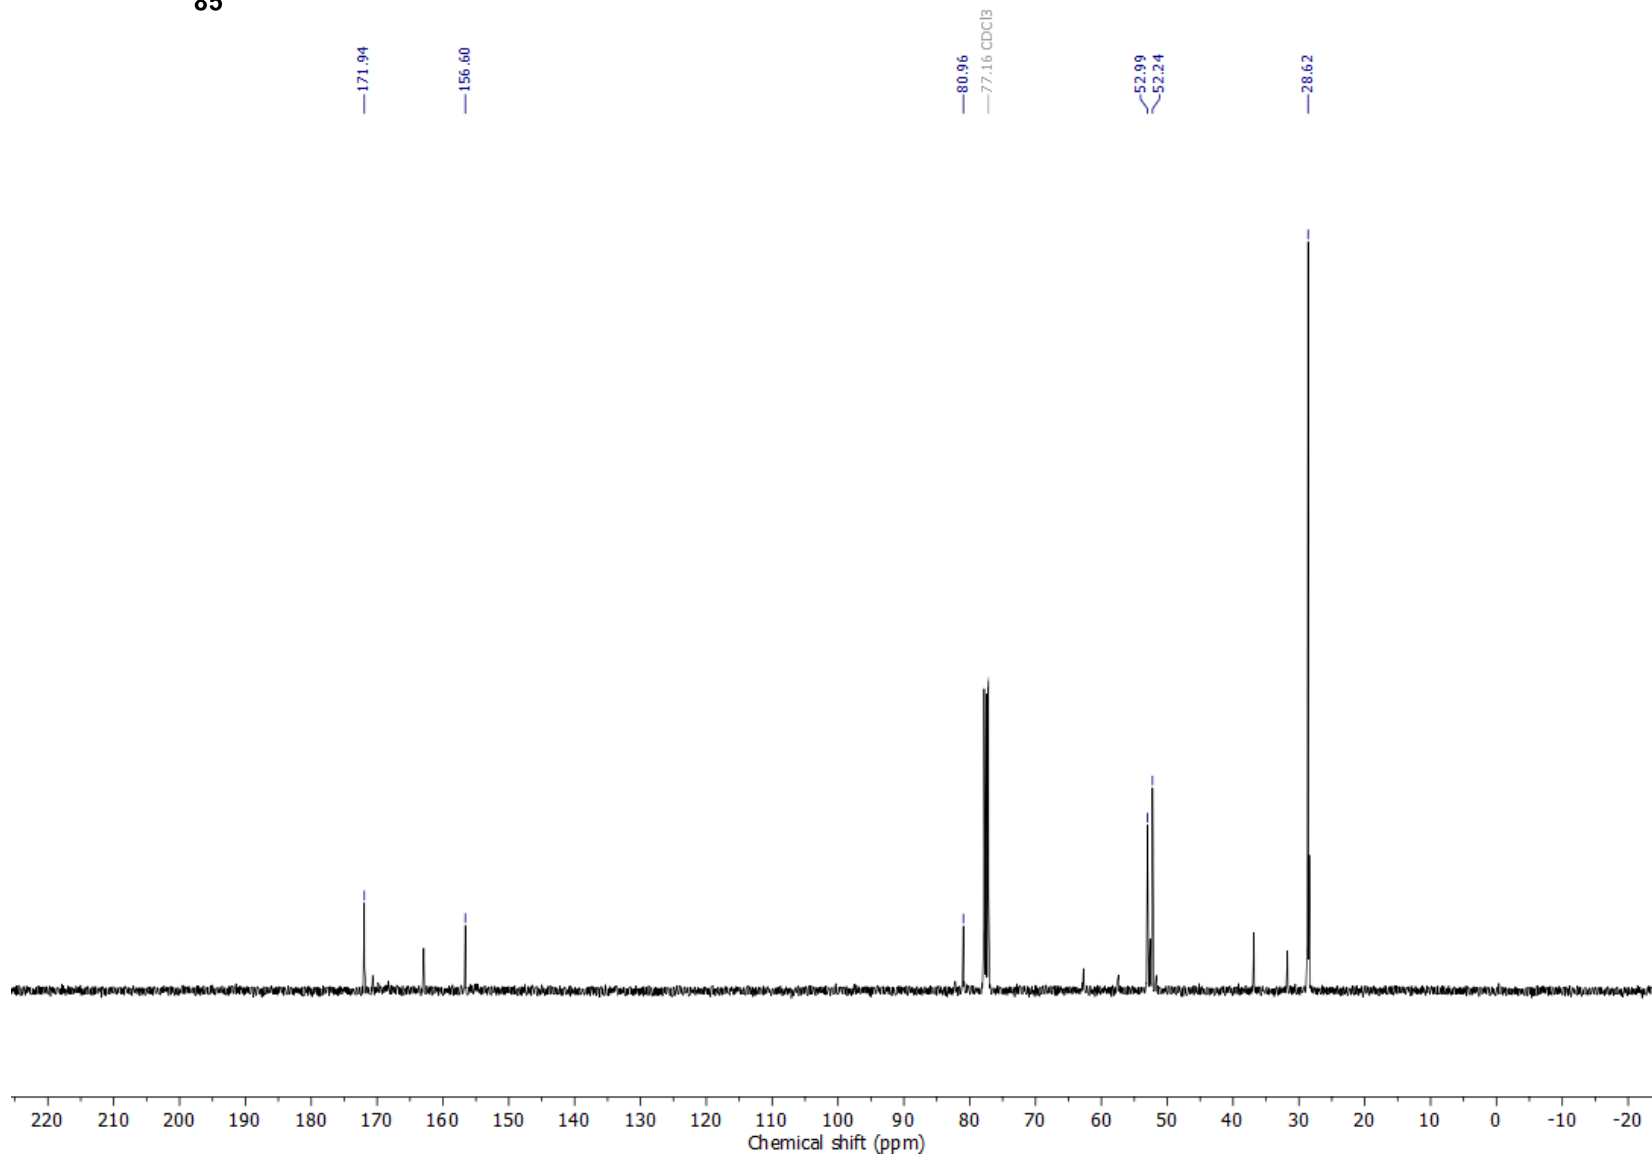

# $^1\text{H}$ NMR (400 MHz, $\text{CDCl}_3$ )

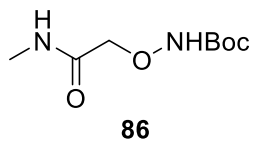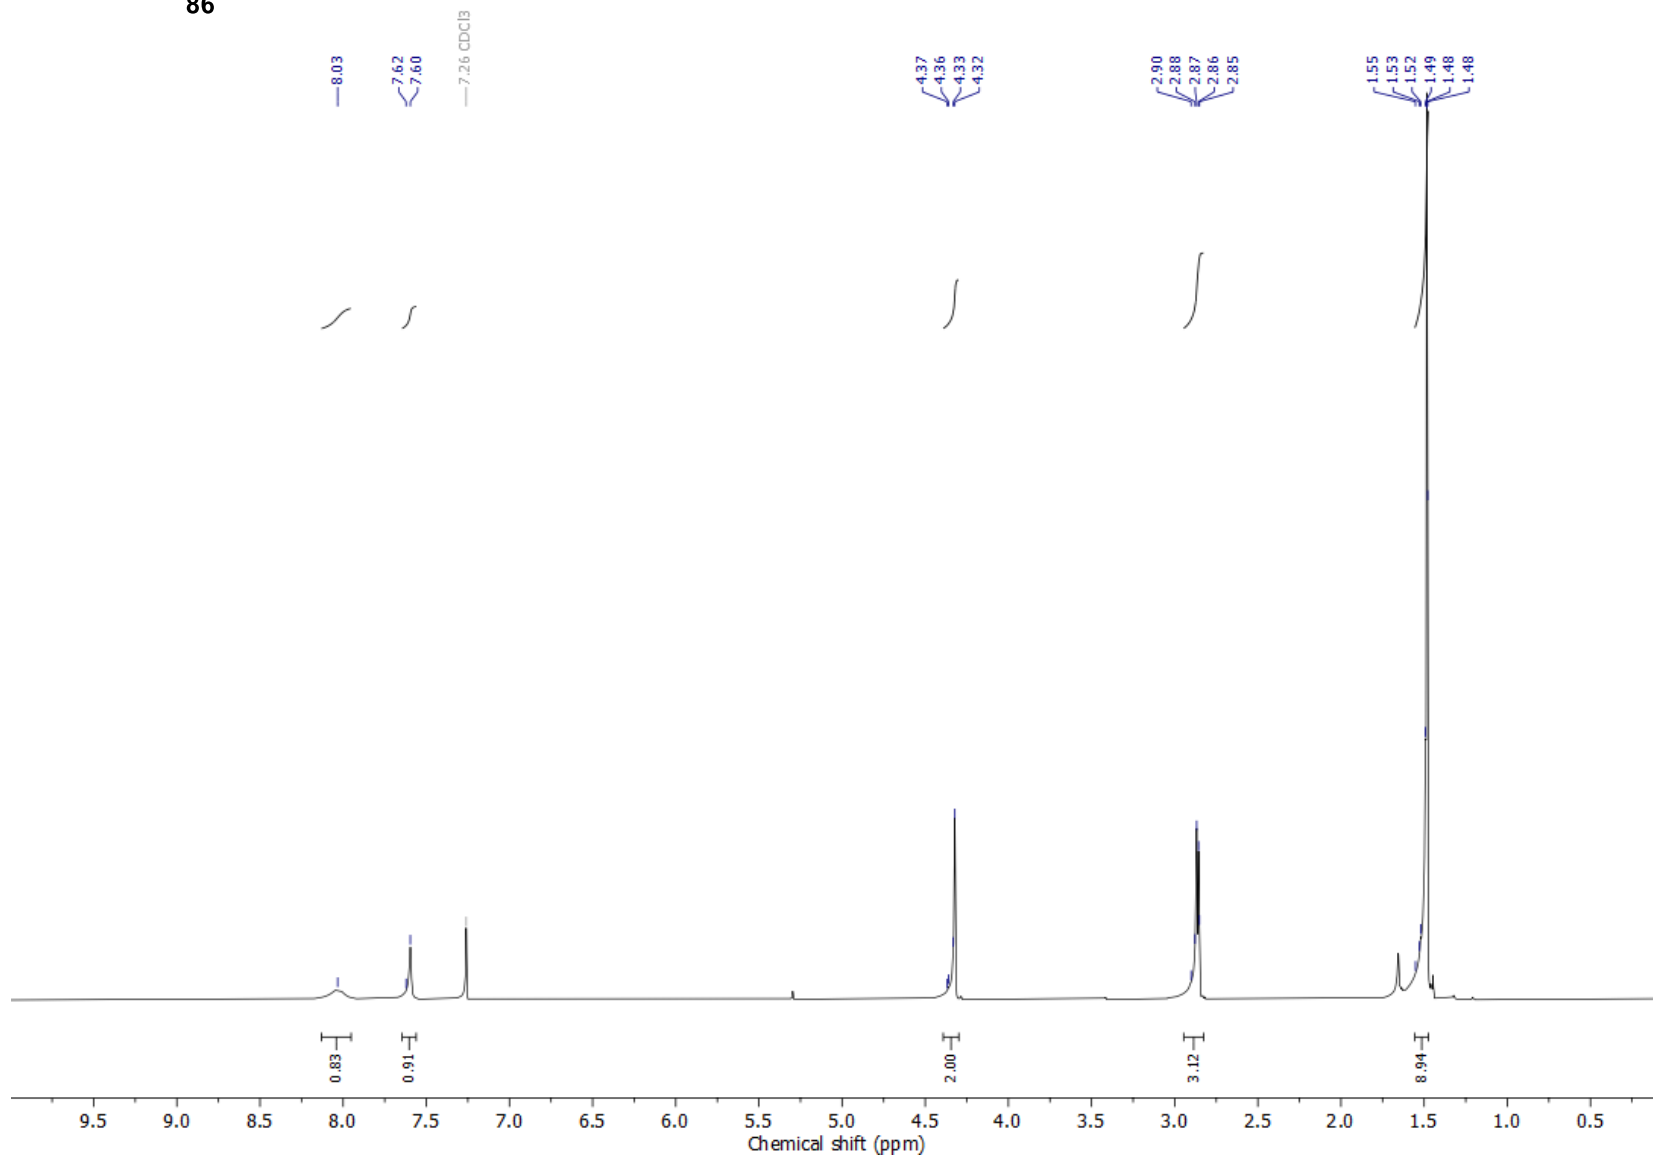

# $^{13}\text{C}$ NMR (100 MHz, $\text{CDCl}_3$ )

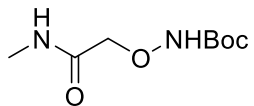

86

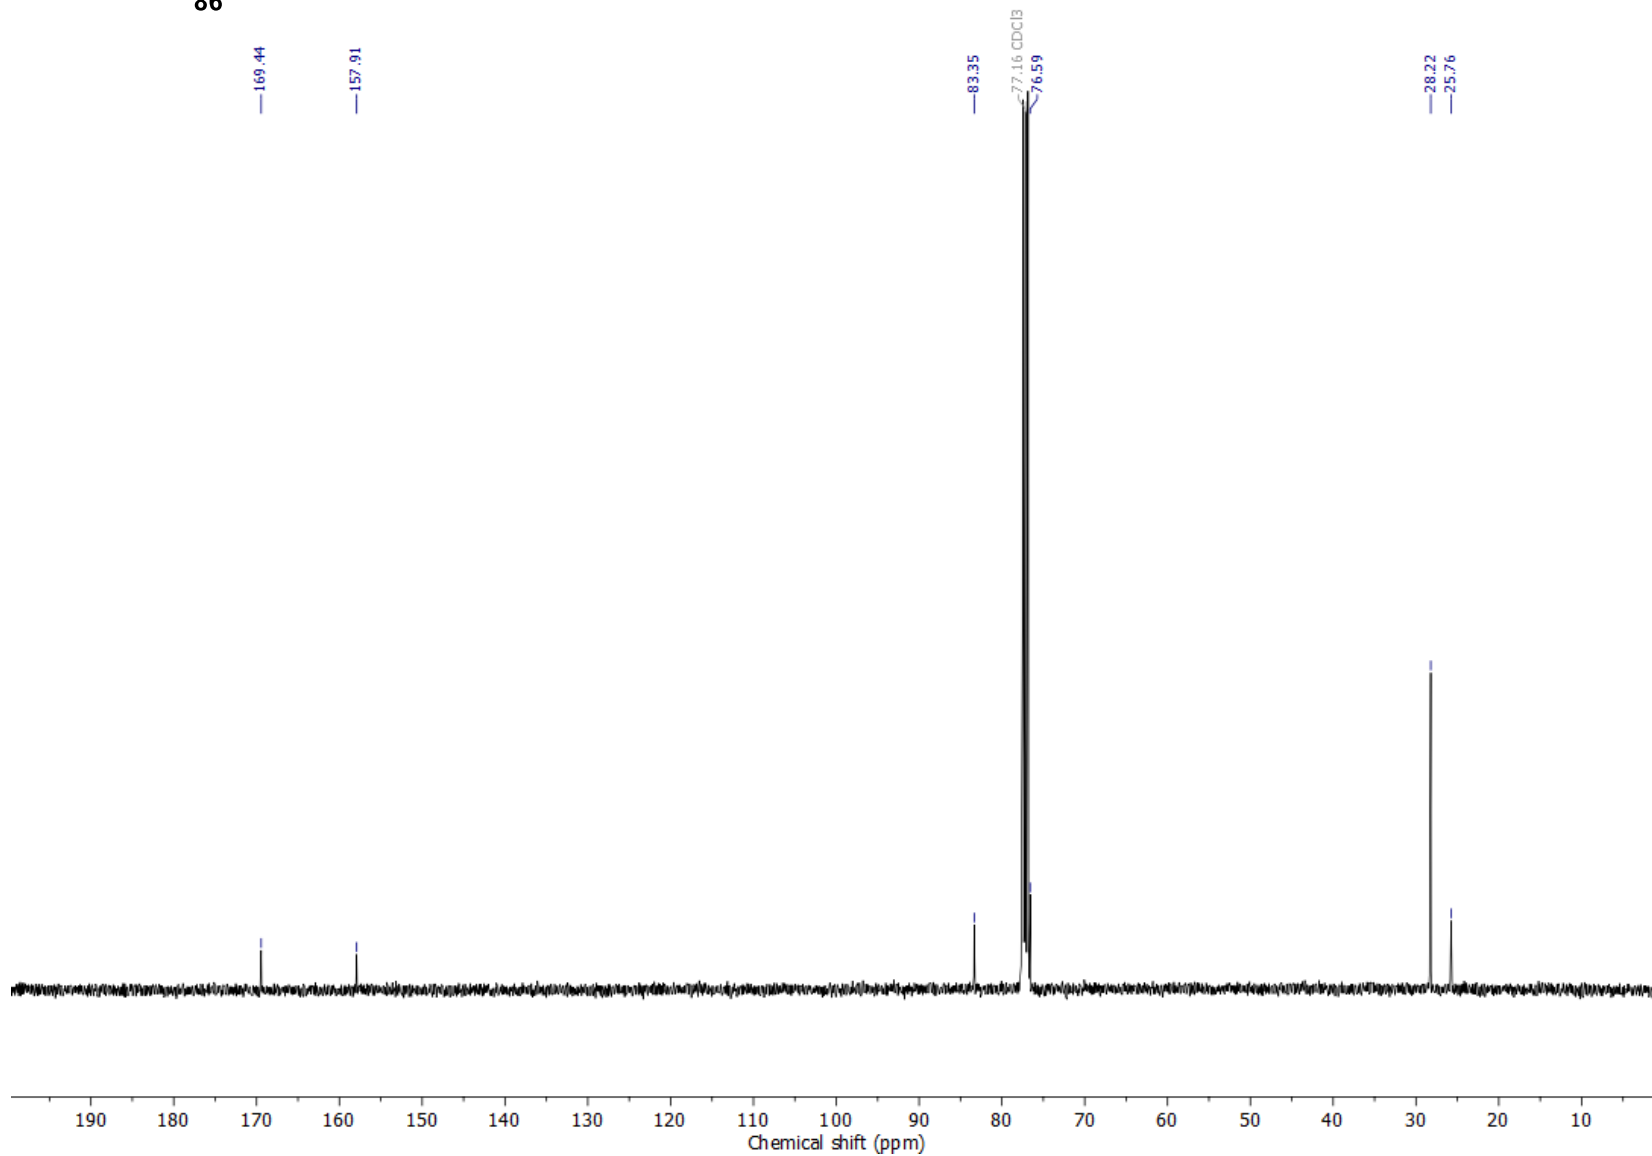

Supplement: d2sc04574e1.pdf [file d2sc04574e1.pdf]
